# Supplementary material for: Site-selective introduction of thiols in unprotected glycosides
Source: Royal Society of Chemistry journal article supplement (doi:10.1039/d3ob00817g), 2023-01-01
Supplement: d3ob00817g1.pdf [file d3ob00817g1.pdf]

## Supporting information

### Site-selective introduction of thiols in unprotected glycosides

Niels R.M. Reintjens, Martin D. Witte, Adriaan J. Minnaard

#### Table of Contents

|                                                                                  |     |
|----------------------------------------------------------------------------------|-----|
| Substitution reactions on 3-chloro sugars .....                                  | S2  |
| Deoxy-thiolation.....                                                            | S4  |
| Experimental procedures.....                                                     | S7  |
| General procedures .....                                                         | S7  |
| Substitution reactions on chloroglycosides .....                                 | S7  |
| Synthesis of epoxides <b>5</b> and <b>6</b> .....                                | S9  |
| Synthesis of $\alpha$ -Glc derivatives.....                                      | S9  |
| Synthesis of Xylose derivatives.....                                             | S11 |
| Synthesis of Gal derivative.....                                                 | S12 |
| Synthesis of maltose derivatives .....                                           | S13 |
| Synthesis of <b>S13</b> and <b>S14</b> .....                                     | S13 |
| Synthesis of $\beta$ -Glc derivative .....                                       | S14 |
| S-glycosides synthesis.....                                                      | S15 |
| Supplemental references .....                                                    | S16 |
| NMR spectra.....                                                                 | S17 |
| NMR spectra of substitution reactions on chloroglycosides .....                  | S17 |
| NMR spectra of epoxides <b>5</b> and <b>6</b> .....                              | S30 |
| NMR spectra of $\alpha$ -Glc derivatives .....                                   | S35 |
| NMR spectra of Xyl derivatives.....                                              | S40 |
| NMR spectra of Gal derivative and side product <b>S10</b> .....                  | S51 |
| NMR spectra of maltose derivative .....                                          | S55 |
| NMR spectra of <b>S13</b> and <b>S14</b> .....                                   | S59 |
| NMR spectra of $\beta$ -glucose derivative and sideproduct <b>S15</b> .....      | S65 |
| NMR of <b>S16</b> , <b>S17</b> , and S-glycosides <b>20</b> and <b>22</b> .....  | S67 |
| HRMS spectra.....                                                                | S76 |
| HRMS spectra of substitution reactions on chloroglycosides.....                  | S76 |
| HRMS spectra of epoxides <b>5</b> and <b>6</b> .....                             | S82 |
| HRMS spectra of $\alpha$ -Glc derivatives .....                                  | S84 |
| HRMS spectra of Xyl derivatives .....                                            | S86 |
| HRMS spectra of Gal derivative .....                                             | S91 |
| HRMS spectra of maltose derivative .....                                         | S92 |
| HRMS spectra of <b>S13</b> and <b>S14</b> .....                                  | S94 |
| HRMS spectra of $\beta$ -Glc derivative .....                                    | S97 |
| HRMS of <b>S16</b> , <b>S17</b> , and S-glycosides <b>20</b> and <b>22</b> ..... | S98 |

## Substitution reactions on 3-chloro sugars

After some experimentation, we found that heating **2**, as a mixture of epimers, with sodium azide in DMA at 130 °C, gave full conversion and provided from a black reaction mixture after column purification 3-azido-glucoside **4** in 37% yield and traces of 2-azido-altroside **S1** (Scheme S1). Similar results were obtained with the substitution of chloro-GlcNAc and chloromaltose.

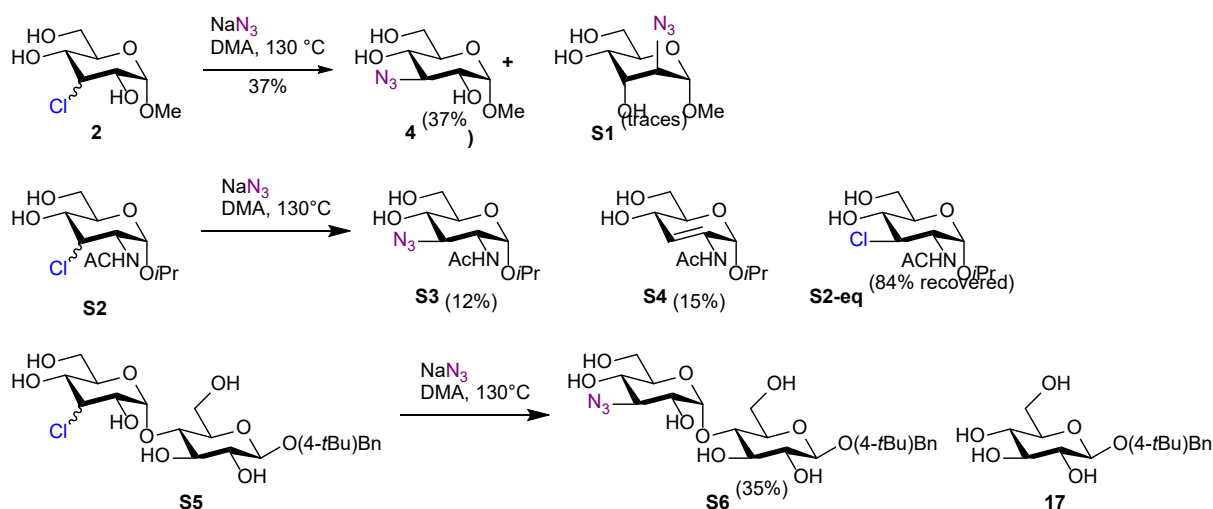

**Scheme S1.** Substitution of 3-Cl Glc (**2**), 3-Cl GlcNAc (**S1**) and 3-Cl maltose (**S4**) with azide. For Glc **2**, a mixture of eq/ax of 1/2.7 was used; for GlcNAc **S1**, a mixture of eq/ax of 1.4/1 was used; for maltose **S4**, a mixture of eq/ax of 1/4.4 was used

To gain insight in the reactivity difference between the axial chloride **2a** and the equatorial chloride **2b**, we separated the isomers and studied their behavior in the substitution reaction (Table S1). Heating **2a** for 2 h at 130 °C in the presence of sodium azide gave a dark colored reaction mixture and, according to NMR analysis, full conversion and formation of **4** in 45% yield (entry 2). This confirms the results of Jones *et al.* that in the presence of sodium azide, the axial chloride substituent is prone to elimination and therefore part of the starting material degrades (Figure S1B).<sup>[1]</sup> Treatment of **2b** in DMA or D<sub>2</sub>O with sodium azide did not lead to the axial azide substituent, but surprisingly gave a mixture of 3-azido-glucoside **4** and 2-azido-altroside **S1** in a ratio of 2:1 (entry 4). The direct substitution reaction is unfavorable due to shielding of the  $\sigma_{\text{C-Cl}}^*$  in the <sup>4</sup>C<sub>1</sub> chair and, apparently, inversion of the chair to the <sup>4</sup>C<sub>1</sub> conformer leads to rapid intramolecular S<sub>N</sub>2 reaction with the C2-hydroxy group (Figure S1B) forming epoxide **5**. Epoxide **5** is subsequently ring-opened by azide providing **4** and **S1**.<sup>[2-4]</sup> Epoxide **5** could be isolated by treatment of **2b** with KO<sup>t</sup>Bu in D<sub>2</sub>O followed by lyophilization. KO<sup>t</sup>Bu was selected as a base for practical reasons, as the small amounts could be weighted out more accurately. Ring-opening of **5** with sodium azide gave a mixture of **4** and **S1** (entry 6). Finally, when we subjected a mixture of **2a** and **2b** to these conditions, **4** and **S1** were formed in a total NMR yield of 86% (entry 8), and could be separated via column chromatography.

Intrigued by the epoxide formation of **2b**, we also subjected chloro-maltoside to KOtBu in D<sub>2</sub>O. This gave epoxide **6** in quantitative yield, which shows the potential of the deoxy-chlorination reaction to obtain epoxides in an unprotected manner.

While these results clearly demonstrate that S<sub>N</sub>2 substitution of chlorides with sodium azide is feasible, the reactions with thiols show that for some nucleophiles an S<sub>N</sub>1 substitution reaction on the more reactive chloro azo compounds may be more suitable.

**Table S1. Screening of substitution reactions on 3-chloro glucose 2**

| Entry | Ratio chloride eq/ax | Solvent          | Nucleophile (eq.)                              | Temperature (°C) | Time (h) | Conversion SM (%)           | NMR yield (%)     |                                 |                                  |
|-------|----------------------|------------------|------------------------------------------------|------------------|----------|-----------------------------|-------------------|---------------------------------|----------------------------------|
|       |                      |                  |                                                |                  |          |                             | Epoxide <b>5</b>  | <b>3-N<sub>3</sub></b> <b>4</b> | <b>2-N<sub>3</sub></b> <b>S1</b> |
| 1     | 0/1                  | DMA              | -                                              | 120              | 1        | 0                           | -                 | 0                               | -                                |
|       |                      |                  |                                                | 130              | 1        | 2                           | -                 | 0                               | -                                |
| 2     | 0/1                  | DMA              | NaN <sub>3</sub> (5)                           | 130              | 2        | 100                         | -                 | 45                              | -                                |
| 3     | 0/1                  | D <sub>2</sub> O | NaN <sub>3</sub> (5)                           | 140              | 4        | 50                          | -                 | <20 <sup>[a]</sup>              | -                                |
| 4     | 1/0                  | DMA              | NaN <sub>3</sub> (5)                           | 130              | 2        | 100                         | -                 | 65                              | 23                               |
| 5     | 1/0                  | D <sub>2</sub> O | NaN <sub>3</sub> (5)                           | 140              | 2        | 100                         | -                 | 65                              | 39                               |
| 6     | 1/0                  | D <sub>2</sub> O | KOtBu (1.1)                                    | 50               | 1.5      | 91                          | 87                | -                               | -                                |
|       |                      | DMA              | NaN <sub>3</sub> (5)<br>NH <sub>4</sub> Cl (1) | 80<br>100        | 1<br>2   | 22<br>84                    | -<br>-            | 13<br>52                        | 0<br>30                          |
| 7     | 1/0                  | D <sub>2</sub> O | KOtBu (1.1)                                    | 50               | 1.5      | 100                         | 89 <sup>[b]</sup> | -                               | -                                |
| 8     | 1/1                  | D <sub>2</sub> O | KOtBu (1.1)                                    | 50               | 1.5      | 100 of ax-Cl<br>12 of eq-Cl | 80                | -                               | -                                |
|       |                      | DMA              | NaN <sub>3</sub> (5)<br>NH <sub>4</sub> Cl (1) | 120              | 3        | 100                         | -                 | 67 <sup>[c]</sup>               | 19 <sup>[c]</sup>                |

<sup>[a]</sup>Due to difficult analysis, the small amounts of **4** are estimated to be max. 20%.

<sup>[b]</sup>This is the isolated yield after column purification.

<sup>[c]</sup>The yields after column purification are: 31% for **4** and 10% for **S1**.

<sup>[d]</sup>After heating for one h, 0.1 eq. DIPEA was added and heated again for an additional h.

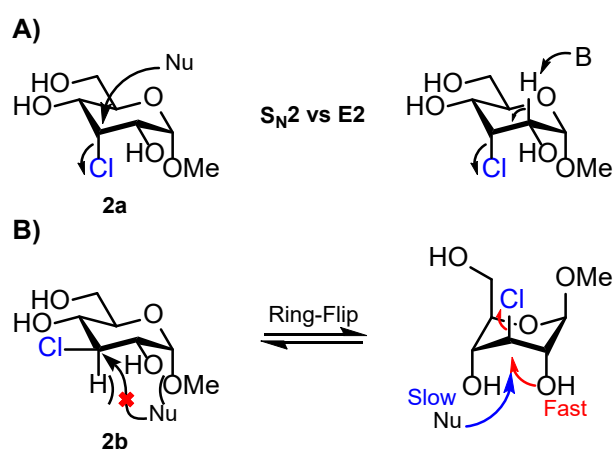

**Figure S1.** A) Substitution of **2** (1/2.7 eq/ax ratio) with sodium azide; B) Substitution versus elimination of the axial chloride; C) The required ring flip of the equatorial chloride to form the epoxide; D) Isolated products after treatment of solely **2a** or **2b** with either KOtBu or NaN<sub>3</sub>; E) Epoxide of maltose.

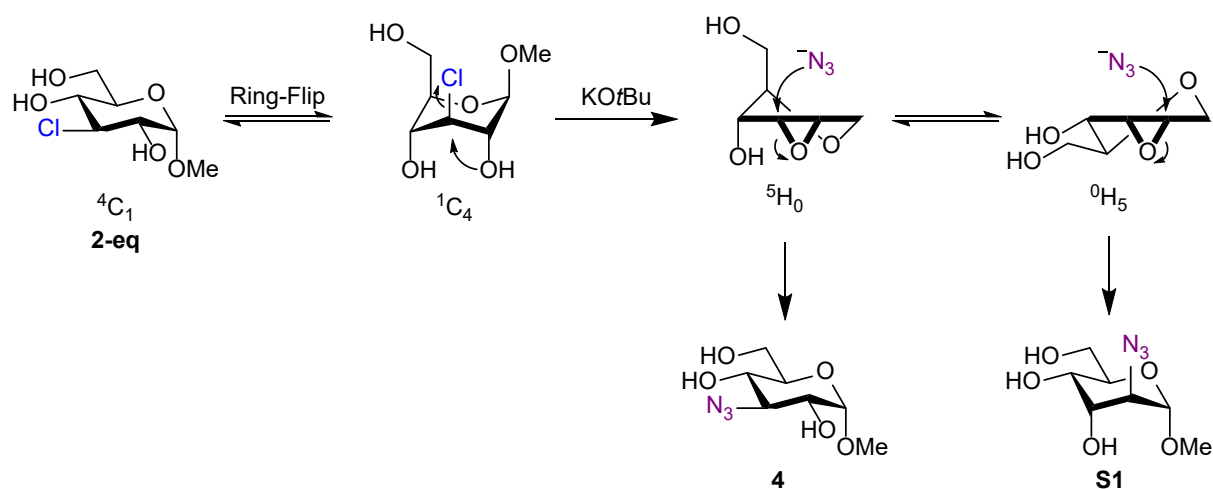

**Scheme S2.** Formation of **4** and **S1** from **2-eq**.

## Deoxy-thiolation

**Table S2.** Dehydroxy-chlorination and deoxy-thiolation reactions

| Entry            | Substrate                | H-donor (eq.)      | Time (min) <sup>[a]</sup> | Temp. (°C) | Yield thiol (Eq/Ax)         | Yield Cl-product (Eq/Ax)   | Yield side-product |
|------------------|--------------------------|--------------------|---------------------------|------------|-----------------------------|----------------------------|--------------------|
| 1 <sup>[b]</sup> | <b>1</b> , $\alpha$ -Glc | <i>t</i> BuSH (80) | 120                       | -20->60    | -                           | 66 ( <b>2</b> )<br>(1/3.5) | -                  |
| 2 <sup>[b]</sup> | <b>1</b> , $\alpha$ -Glc | EtSH (80)          | 120                       | -20->40    | 74 ( <b>3a</b> )<br>(1/2.6) | 19 ( <b>2</b> )<br>(1/1.4) | -                  |
| 3                | <b>1</b> , $\alpha$ -Glc | EtSH (80)          | 310                       | -20->10    | 97 ( <b>3a</b> )<br>(1/3.7) | -                          | -                  |
| 4                | <b>1</b> , $\alpha$ -Glc | PhSH (80)          | O.N.                      | -20->15    | 80 ( <b>3b</b> )<br>(1/1.5) | -                          | -                  |
| 5                | <b>1</b> , $\alpha$ -Glc | BnSH (80)          | O.N.                      | -20->15    | 84 ( <b>3c</b> )<br>(1/5.1) | -                          | -                  |
| 6                | <b>1</b> , $\alpha$ -Glc | BnSH (80)          | O.N.                      | -20->-5    | 77 ( <b>3c</b> )<br>(1/4.6) | -                          | -                  |
| 7                | <b>1</b> , $\alpha$ -Glc | AcSH (80)          | 300                       | -20->5     | 64 ( <b>3d</b> )<br>(1.3/1) | -                          | -                  |
| 8 <sup>[c]</sup> | <b>1</b> , $\alpha$ -Glc | AcSH (80)          | 300                       | -20->5     | 58 ( <b>3d</b> )<br>(1.1/1) | -                          | -                  |
| 9                | <b>1</b> , $\alpha$ -Glc | AcSH (80)          | O.N.                      | -20->-5    | 56 ( <b>3d</b> )<br>(1.2/1) | -                          | -                  |
| 10               | <b>1</b> , $\alpha$ -Glc | AcSH (80)          | O.N.                      | -20->-10   | 52 ( <b>3d</b> )<br>(1/1.1) | -                          | -                  |

<sup>[a]</sup>After addition of the thiol.

<sup>[b]</sup>Earlier published results.<sup>[5]</sup>

<sup>[c]</sup>Scale-up to 6 mmol.

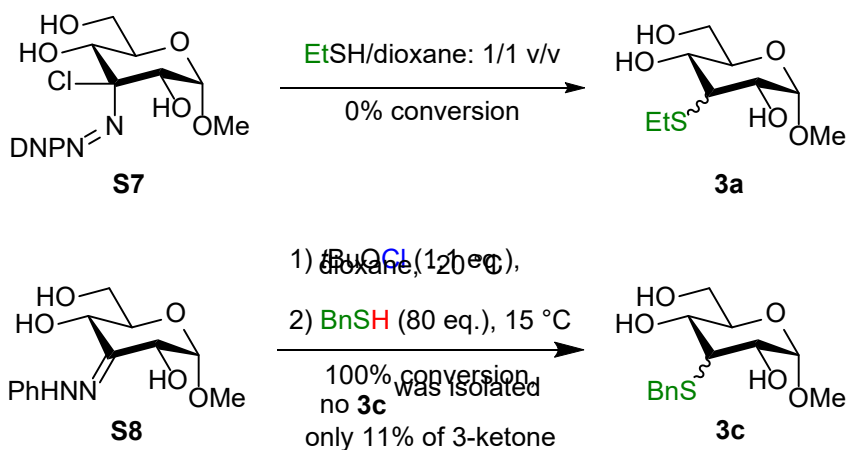

**Scheme S3.** Failed deoxy-thiolation reactions on **S7** and **S8**.

**Table S3.** Deoxy-thiolation reactions

| Entry | Substrate                      | H-donor (eq.) | Time (min) <sup>[a]</sup> | Temp. (°C) | Yield thiol (Eq/Ax)         | Yield Cl-product (Eq/Ax)    | Yield side-product |
|-------|--------------------------------|---------------|---------------------------|------------|-----------------------------|-----------------------------|--------------------|
| 1     | <b>7</b> , Xylose              | EtSH (80)     | O.N.                      | -20->-5    | 41 ( <b>8a</b> )<br>(1/5)   | -                           | -                  |
| 2     | <b>7</b> , Xylose              | BnSH (80)     | O.N.                      | -20->-5    | 41 ( <b>8b</b> )<br>(1/5)   | -                           | -                  |
| 3     | <b>7</b> , Xylose              | AcSH (80)     | O.N.                      | -20->-5    | 36 ( <b>8c</b> )<br>(1.5/1) | -                           | -                  |
| 4     | <b>9</b> ,<br>4-TrtHNN-Gal     | EtSH (80)     | O.N.                      | -20->15    | -                           | 20 ( <b>S9</b> )<br>(1.8/1) | 10 ( <b>S10</b> )  |
| 5     | <b>9</b> ,<br>4-TrtHNN-Gal     | AcSH (80)     | O.N.                      | -20->-5    | 22 ( <b>10</b> )<br>(1/3.7) | 15 ( <b>S9</b> )<br>(1/1.4) | 40 ( <b>S10</b> )  |
| 6     | <b>11</b> , Maltose            | BnSH (80)     | O.N.                      | -20->-5    | 57 ( <b>12</b> )<br>(1/5)   | -                           | -                  |
| 7     | <b>S11</b> , GlcNAc            | EtSH (80)     | O.N.                      | -20->15    | -                           | 39 ( <b>S2</b> )<br>(2/1)   | 15 ( <b>S12</b> )  |
| 8     | <b>S13</b> , Ac- $\alpha$ -Glc | BnSH (80)     | O.N.                      | -20->15    | -                           | 44 ( <b>S14</b> )<br>(3/1)  | -                  |
| 9     | <b>13</b> , $\beta$ -Glc       | BnSH (80)     | O.N.                      | -20->15    | 21 ( <b>14</b> )<br>(1/1.1) | 54 ( <b>15</b> )<br>(1.8/1) | 5 ( <b>S15</b> )   |
| 10    | <b>16</b> , Cellobiose         | AcSH (80)     | O.N.                      | -20->15    | -                           | -                           | 47 ( <b>17</b> )   |
| 11    | <b>16</b> , Cellobiose         | BnSH (80)     | O.N.                      | -20->-5    | -                           | -                           | 50 ( <b>17</b> )   |

<sup>[a]</sup>After addition of the thiol.

<sup>[b]</sup>Scale-up to 6 mmol.

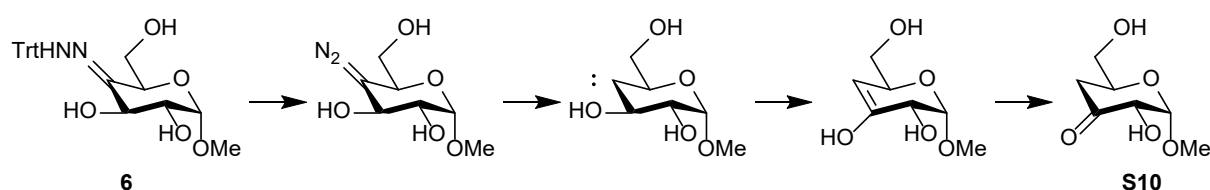

**Scheme S4.** Proposed mechanism formation of **S10**.

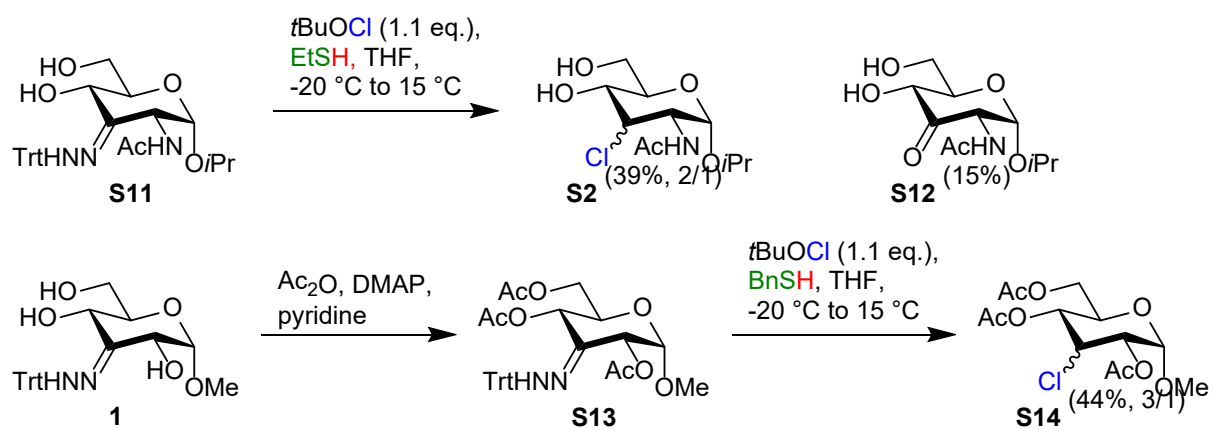

**Scheme S5.** Attempted deoxy-thiolation reactions on N-acetyl glucosamine **S11** and acetylated trityl hydrazone **S13**. The ratios behind the yield are the equatorial/axial ratios.

## Experimental procedures

### General procedures

#### General Information

All solvents used for reaction, extraction, filtration, and chromatography were of commercial grade and used without further purification. Automated flash chromatography was performed on a Reveleris® X2 Flash Chromatography, using Grace® Reveleris Silica flash cartridges (12 grams).  $^1\text{H}$ -,  $^{13}\text{C}$ -, APT-, HSQC-, and COSY-NMR were recorded on a Varian AMX400 spectrometer (400, 101 MHz, respectively) using DMSO- $d_6$ , chloroform- $d$ , or methanol- $d_4$  as solvent. Chemical shifts are given in ppm ( $\delta$ ) relative to the solvent residual peak. Data are reported as follows: chemical shifts ( $\delta$ ), multiplicity (s = singlet, d = doublet, dd = double doublet, ddd = double double doublet, t = triplet, q = quartet, m = multiplet), coupling constants J (Hz), and integration. High Resolution Mass measurements were performed using a ThermoScientific LTQ OrbitrapXL spectrometer. Microwave reactions were performed with Biotage® Initiator+.

#### Preparation of *tert*-butyl hypochlorite

10-15% aqueous NaOCl (100 mL) was diluted with water (150 mL). The solution was cooled to 0 °C and placed in the dark. AcOH (10 mL) and *t*BuOH (15.5 mL) were added in one single portion. The solution was stirred for 15 min. The formed *tert*-butyl hypochlorite formed an immiscible layer on top of the water. The reaction mixture was poured into a separatory funnel and the aqueous layer was discarded. The neat *tert*-butyl hypochlorite layer was washed with sat. aq. NaHCO<sub>3</sub> (1× 100 mL), water (1× 50 mL) and filtered over a pipet filled with CaCl<sub>2</sub>. Neat yellow *tert*-butyl hypochlorite was obtained, which was stored over CaCl<sub>2</sub> under N<sub>2</sub> atmosphere in a fridge for a maximum period of one month. When used in a reaction, it was dissolved in the solvent mentioned.

#### General procedure of following experiments with qNMR.

The starting material was dissolved in a microwave vial with either D<sub>2</sub>O or DMA to obtain a solution with a concentration of 0.1 M, followed by the addition of the internal standard. For experiments in D<sub>2</sub>O DMSO was used as I.S., while for experiments in DMA 1,2-dichlorobenzene was used. In the case of D<sub>2</sub>O, the reaction mixture was shaken and transferred to an NMR tube.  $^1\text{H}$ -NMR was taken (t<sub>0</sub> measurement) with 8 scans (nt=8) and a d1 value of 60 (d1=60). After the NMR measurement, the D<sub>2</sub>O mixture was transferred to the microwave vial. When DMA was used, a small amount was taken and concentrated in vacuo before being dissolved in methanol- $d_4$  followed by t<sub>0</sub> measurement. Next, the additive was added and the reaction mixture was heated to the given temperature. The reaction was followed by using the NMR-sample preparation method mentioned earlier.

#### Substitution reactions on chloroglycosides

##### Methyl 3-azido-3-deoxy- $\alpha$ -D-glucopyranoside (**4**)

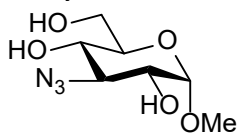

NaN<sub>3</sub> (71 mg, 1.1 mmol, 5.0 eq.) was added in a microwave vial, followed by the addition of a solution of compound **2** (46 mg, 0.22 mmol, 1.0 eq., ax/eq ratio: 1/1) in DMA (2.2 mL). The vial was closed with a cap and heated for two hours at 100 °C in a microwave.

NMR analysis showed only 5% conversion, therefore the vial was heated once more for two hours at 130 °C. NMR analysis showed full conversion and the reaction mixture was concentrated *in vacuo*. Purification by Grace flash chromatography on a 15 g silica cartridge using DCM/MeOH (0 to 10% MeOH in DCM) gave the title compound (19 mg, 80  $\mu\text{mol}$ , 73% starting from the axial chloride) as an oil. HRMS (ESI neg)  $m/z$  calcd for C<sub>7</sub>H<sub>12</sub>N<sub>3</sub>O<sub>5</sub> [M-H]<sup>-</sup>: 218.0782, found: 218.0782.  $^1\text{H}$  NMR (400 MHz, Methanol- $d_4$ )  $\delta$  = 4.68 (d,  $J$ =3.6, 1H), 3.81 (dd,  $J$ =11.8, 1.9, 1H), 3.69 (dd,  $J$ =11.8, 5.3, 1H), 3.61 – 3.51 (m, 2H), 3.48 – 3.38 (m, 4H), 3.37 – 3.27 (m, 1H).  $^{13}\text{C}$  NMR (101 MHz, Chloroform- $d$ )  $\delta$  = 100.6, 73.5, 72.3, 70.2, 68.7, 62.3, 55.6.

### Methyl 2-azido-2-deoxy- $\alpha$ -D-altropyranoside (**S1**)

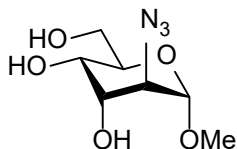

Compound **2** (38.6 mg, 0.18 mmol, ax/eq ratio: 1/1) was dissolved in D<sub>2</sub>O (1.8 mL). DMSO (13  $\mu$ L, 0.18 mmol, 1.0 eq.) was added as internal standard. qNMR (t<sub>0</sub>) was measured as described in the general procedure. The azide was introduced as described in the general procedure. KOtBu (20 mg, 0.18 mmol, 1.0 eq.) was added and the reaction mixture was heated for 1.5 hours at 50 °C in a microwave. qNMR analysis showed full conversion of the equatorial chloride **2-*eq*** to epoxide **5**. After lyophilization, the crude was dissolved in DMA (1.8 mL) in a microwave vial, followed by the addition of 1,2-dichlorobenzene (20  $\mu$ L, 0.18 mmol, 1.0 eq.). qNMR (t<sub>0</sub>) was measured with 50  $\mu$ L of the reaction mixture. NaN<sub>3</sub> (59 mg, 0.91 mmol, 5.0 eq.) and NH<sub>4</sub>Cl (9.7 mg, 0.18 mmol, 1.0 eq.) were added and the reaction mixture was heated to 120 °C for three hours, after which qNMR (t<sub>1</sub>) showed full conversion of **2-*ax*** and **5**. The reaction mixture was concentrated *in vacuo* and purified by Grace flash chromatography on a 15 g silica cartridge using DCM/MeOH (0 to 10% MeOH in DCM) to give **4** (12.5 mg, 57  $\mu$ mol, 31%) and **S1** (4.0 mg, 18  $\mu$ mol, 10%). The analysis of **4** is described *vide supra*. HRMS (ESI neg) *m/z* calcd for C<sub>7</sub>H<sub>12</sub>N<sub>3</sub>O<sub>5</sub> [M-H]<sup>-</sup>: 218.0782, found: 218.0784. <sup>1</sup>H NMR (400 MHz, Methanol-*d*<sub>4</sub>)  $\delta$  4.58 (d, *J* = 3.7 Hz, 1H), 3.84 (td, *J* = 6.6, 3.2 Hz, 1H), 3.80 – 3.75 (m, 3H), 3.75 – 3.72 (m, 1H), 3.71 – 3.64 (m, 2H), 3.43 (s, 3H). <sup>13</sup>C NMR (101 MHz, Methanol-*d*<sub>4</sub>)  $\delta$  101.4, 73.8, 70.6, 67.1, 64.3, 63.0, 55.9.

### Isopropyl 2-acetamido-3-azido-2,3-dideoxy- $\alpha$ -D-glucopyranoside (**S3**)

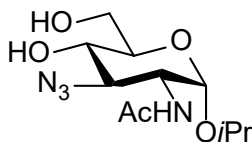

NaN<sub>3</sub> (41 mg, 0.63 mmol, 5.0 eq.) was added in a microwave vial, followed by the addition of a solution of compound **S2**<sup>[5]</sup> (36 mg, 0.13 mmol, 1.0 eq., ax/eq ratio: 1/1.4) in DMA (2.5 mL). The vial was closed with a cap and heated for two hours at 130 °C in a microwave. The reaction mixture was concentrated *in vacuo*. Purification by Grace flash chromatography on a 15 g silica cartridge using DCM/MeOH (0 to 10% MeOH in DCM) gave two fractions. One was a mixture of the title compound (4.3 mg, 15  $\mu$ mol 29% starting from the axial chloride) and unreacted equatorial chloride **S2-*eq*** (17.4 mg, 62  $\mu$ mol, 83% recovered). The other fraction contained compound **S4** (4.7 mg, 19  $\mu$ mol). The analysis of **S4** is described *vide infra*. HRMS (ESI) *m/z* calcd for C<sub>11</sub>H<sub>20</sub>N<sub>4</sub>O<sub>5</sub>Na [M+Na]<sup>+</sup>: 311.1326, found: 311.1322. Because of the overlap with the spectrum of **S2-*eq***, only two signals from **S3** can be observed in <sup>1</sup>H NMR. <sup>1</sup>H NMR (400 MHz, Methanol-*d*<sub>4</sub>)  $\delta$  = 3.61 (dd, *J* = 11.2, 9.3 Hz, 1H), 3.41 (t, *J* = 9.3 Hz, 1H). <sup>13</sup>C NMR (101 MHz, Methanol-*d*<sub>4</sub>)  $\delta$  = 173.3, 96.1, 73.8, 71.2, 71.1, 65.6, 62.4, 53.5, 23.6, 22.4, 21.6.

### Side product of the azide introduction in GlcNAc (**S4**)

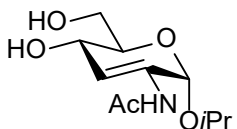

Compound **S4** (4.7 mg, 19  $\mu$ mol) was isolated during the synthesis of **S3**. HRMS (ESI) *m/z* calcd for C<sub>11</sub>H<sub>19</sub>NO<sub>5</sub>Na [M+Na]<sup>+</sup>: 268.1155, found: 268.1151. <sup>1</sup>H NMR (400 MHz, Methanol-*d*<sub>4</sub>)  $\delta$  = 6.12 (d, *J*=2.1, 1H), 5.28 (s, 1H), 4.13 (d, *J*=8.9, 1H), 4.02 (p, *J*=6.2, 1H), 3.82 (d, *J*=10.0, 1H), 3.75 – 3.64 (m, 2H), 2.01 (s, 3H), 1.25 (d, *J*=6.2, 3H), 1.18 (d, *J*=6.1, 3H). <sup>13</sup>C NMR (101 MHz, Methanol-*d*<sub>4</sub>)  $\delta$  = 172.1, 134.8, 118.1, 94.0, 73.6, 72.0, 64.3, 62.7, 24.1, 23.5, 22.3.

### 4-*tert*-butylbenzyl-3-azido-3-deoxy- $\alpha$ -D-maltoside (**S6**)

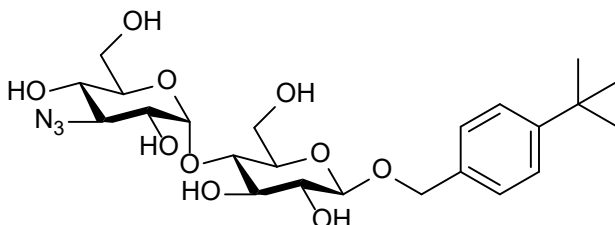

NaN<sub>3</sub> (26 mg, 0.40 mmol, 5.3 eq.) was added in a microwave vial, followed by the addition of a solution of compound **S5**<sup>[5]</sup> (38 mg, 75  $\mu$ mol, 1.0 eq., ax/eq ratio: 4.4/1) in DMA (1.5 mL). The vial was closed with a cap and heated for two hours at 130 °C in a microwave. NMR analysis showed full conversion and the reaction mixture was concentrated *in vacuo*. Purification by Grace flash chromatography on a 15 g silica cartridge using DCM/MeOH (0 to 25% MeOH in DCM) gave a mixture of the title compound (13 mg, 26  $\mu$ mol, 43% starting from the axial chloride) and side product **17** (7.6 mg, 23  $\mu$ mol, 38% starting from the axial chloride) which could not be separated. HRMS (ESI) *m/z* calcd for C<sub>23</sub>H<sub>35</sub>N<sub>3</sub>O<sub>10</sub>Na [M+Na]<sup>+</sup>: 536.2215, found: 536.2203. <sup>1</sup>H NMR (400 MHz,



Methanol-*d*<sub>4</sub>)  $\delta$  = 7.38 (q, *J*=8.4, 4H), 5.21 (d, *J*=3.7, 1H), 4.90 (d, *J*=11.7, 1H), 4.66 (d, *J*=11.6, 1H), 4.38 (dd, *J*=12.8, 7.7, 1H), 3.97 – 3.89 (m, 1H), 3.88 – 3.81 (m, 2H), 3.77 – 3.59 (m, 4H), 3.59 – 3.52 (m, 1H), 3.46 (dd, *J*=10.2, 3.6, 1H), 3.44 – 3.39 (m, 1H), 3.36 – 3.22 (m, 8H), 1.33 (s, 9H). <sup>13</sup>C NMR (101 MHz, Methanol-*d*<sub>4</sub>)  $\delta$  = 151.9, 136.0, 129.2, 126.2, 103.1, 102.0, 81.0, 77.8, 76.6, 74.8, 74.6, 72.8, 71.7, 70.0, 68.8, 62.4, 62.2, 35.4, 31.8.

#### 4-*tert*-butylbenzyl- $\beta$ -D-glucopyranoside (**17**)

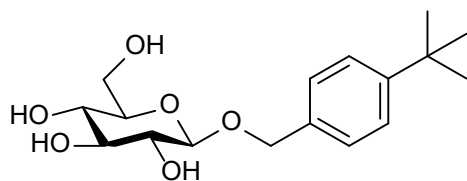

Compound **17** was formed during the attempted deoxy-thiolation of **16** (Table S3, entry 10 & 11) and the synthesis of **S6**. HRMS (ESI) *m/z* calcd for C<sub>17</sub>H<sub>26</sub>NO<sub>6</sub>Na [M+Na]<sup>+</sup>: 349.1622, found: 349.1622. <sup>1</sup>H NMR (400 MHz, Methanol-*d*<sub>4</sub>)  $\delta$  = 7.43 – 7.33 (m, 4H), 4.91 (d, *J*=11.6, 1H), 4.66 (d, *J*=11.6, 1H), 4.37 (d, *J*=7.7, 1H), 3.92 (dd, *J*=11.9, 2.1, 1H), 3.72 (dd, *J*=11.9, 5.6, 1H), 3.39 – 3.24 (m, 4H), 1.33 (s, 9H). <sup>13</sup>C NMR (101 MHz, Methanol-*d*<sub>4</sub>)  $\delta$  = 151.8, 135.9, 129.2, 126.1, 103.1, 78.0, 77.9, 75.1, 71.5, 62.8, 35.3, 31.8.

### Synthesis of epoxides **5** and **6**

#### Methyl 2,3-anhydro- $\alpha$ -D-glucopyranoside (**5**)

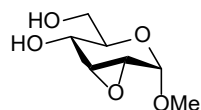

Compound **2-eq**<sup>[5]</sup> (0.13 g, 0.62 mmol, 1.0 eq.) was dissolved in D<sub>2</sub>O (6.2 mL). DMSO (44  $\mu$ L, 0.62 mmol, 1.0 eq.) was added as internal standard. KO<sup>t</sup>Bu (76 mg, 0.68 mmol, 1.1 eq.) was added and the reaction mixture was heated for 1.5 hours at 50 °C in a microwave. qNMR analysis showed full conversion. After lyophilization, the crude was purified by Grace flash chromatography on a 15 g silica cartridge using DCM/MeOH (0 to 10% MeOH in DCM) and lyophilization gave the title compound (83 mg, 0.44 mmol, 70%). HRMS (ESI neg) *m/z* calcd for C<sub>7</sub>H<sub>11</sub>O<sub>5</sub> [M-H]<sup>-</sup>: 175.0612, found: 175.0614. <sup>1</sup>H NMR (400 MHz, Methanol-*d*<sub>4</sub>)  $\delta$  4.92 (d, *J* = 3.2 Hz, 1H), 3.87 – 3.78 (m, 2H), 3.68 – 3.59 (m, 2H), 3.54 (dd, *J* = 4.2, 3.2 Hz, 1H), 3.46 (s, 3H), 3.42 – 3.39 (m, 1H). <sup>13</sup>C NMR (101 MHz, Methanol-*d*<sub>4</sub>)  $\delta$  96.0, 70.9, 66.4, 62.5, 55.9, 55.7, 55.1. <sup>1</sup>H NMR (400 MHz, Deuterium Oxide)  $\delta$  5.07 (d, *J* = 3.1 Hz, 1H), 3.96 (dd, *J* = 9.6, 1.7 Hz, 1H), 3.87 (dd, *J* = 12.2, 2.1 Hz, 1H), 3.75 – 3.66 (m, 2H), 3.65 – 3.57 (m, 2H), 3.48 (s, 3H).

#### 4-*tert*-butylbenzyl-2,3-anhydro- $\alpha$ -D-maltoside (**6**)

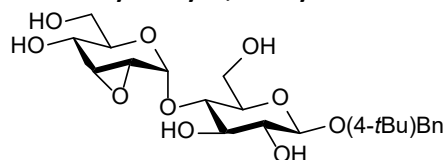

4-*tert*-butylbenzyl-3-chloro-3-deoxy- $\beta$ -D-maltoside<sup>[5]</sup> (5.0 mg, 9.9  $\mu$ mol, 1.0 eq.) was dissolved in D<sub>2</sub>O (0.47 mL) in an NMR tube. DMSO (1  $\mu$ L, 9.9  $\mu$ mol, 1.0 eq.) was added as internal standard. A solution of KO<sup>t</sup>Bu in D<sub>2</sub>O (0.5 M, 30  $\mu$ g, 15  $\mu$ mol, 1.5 eq.) was added and the reaction mixture was heated for 1.5 hours at 50 °C. NMR analysis showed full conversion. After lyophilization, the title compound was obtained in quantitative yield (5.5 mg). HRMS (ESI pos) *m/z* calcd for C<sub>23</sub>H<sub>34</sub>O<sub>10</sub>Na [M+Na]<sup>+</sup>: 493.2044, found: 493.2041. <sup>1</sup>H NMR (400 MHz, Methanol-*d*<sub>4</sub>)  $\delta$  7.36 (d, *J* = 8.4 Hz, 2H), 7.31 (d, *J* = 8.5 Hz, 2H), 5.56 (d, *J* = 3.0 Hz, 1H), 4.85 (d, *J* = 11.7 Hz, 1H), 4.61 (d, *J* = 11.6 Hz, 1H), 4.33 (d, *J* = 7.8 Hz, 1H), 3.85 – 3.76 (m, 3H), 3.75 – 3.67 (m, 3H), 3.58 – 3.51 (m, 3H), 3.36 (dd, *J* = 4.3, 1.1 Hz, 1H), 3.33 – 3.29 (m, 1H), 3.23 (dd, *J* = 9.3, 7.8 Hz, 1H), 1.29 (s, 9H). <sup>13</sup>C NMR (101 MHz, Methanol-*d*<sub>4</sub>)  $\delta$  134.5, 127.7, 124.7, 101.7, 93.9, 77.4, 75.0, 73.9, 73.9, 70.6, 70.1, 65.2, 61.6, 60.4, 54.6, 53.8, 30.3.

### Synthesis of $\alpha$ -Glc derivatives

#### Methyl 3-*S*-ethyl-3-deoxy- $\alpha$ -D-allo/glucopyranoside (**3a**)

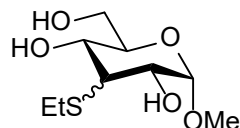

A 100 mL flask equipped with a magnetic stir bar was charged with trityl hydrazone **1**<sup>[5]</sup> (186 mg, 0.40 mmol, 1.0 eq.) and THF (4 mL). The resulting solution was evacuated and backfilled with N<sub>2</sub> (3 times) and then cooled to -20 °C (external temperature). *tert*-Butyl

hypochlorite (1.24 M in DCM, 0.35 mL, 1.1 eq.) was added dropwise to the cooled solution of hydrazone and stirred for 15 minutes. The resulting light-yellow solution was then frozen in a liquid N<sub>2</sub> bath and degassed by two freeze-pump-thaw cycles, each time thawing in a -20 °C bath. After backfilling with N<sub>2</sub>, the reaction was maintained at an external temperature ≤ -15 °C for 20 minutes. During this time EtSH was purged for 5 minutes with N<sub>2</sub>. Excess EtSH (2.3 mL, 32 mmol, 80 eq.) was added to the cooled reaction. The reaction flask was subsequently allowed to warm-up to 10 °C over 5 h, after which the reaction mixture was concentrated *in vacuo*. Purification by Grace flash chromatography on a 15 g silica cartridge using DCM/MeOH (0 to 10% MeOH in DCM) gave the title compound (93 mg, 0.39 mmol, 97%). The NMR shows the ratio of equatorial and axial is 1/3.7. Analysis was in agreement with literature.<sup>[5]</sup>

#### Methyl 3-S-phenyl-3-deoxy- $\alpha$ -D-allo/glucoopyranoside (**3b**)

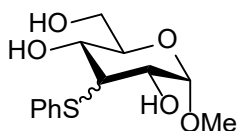

A 100 mL flask equipped with a magnetic stir bar was charged with trityl hydrazone **1**<sup>[5]</sup> (189 mg, 0.40 mmol, 1.0 eq.) and THF (4 mL). The resulting solution was evacuated and backfilled with N<sub>2</sub> (3 times) and then cooled to -20 °C (external temperature). *tert*-Butyl hypochlorite (1.24 M in DCM, 0.35 mL, 1.1 eq.) was added dropwise to the cooled solution of hydrazone and stirred for 15 minutes. The resulting light-yellow solution was then frozen in a liquid N<sub>2</sub> bath and degassed by two freeze-pump-thaw cycles, each time thawing in a -20 °C bath. After backfilling with N<sub>2</sub>, the reaction was maintained at an external temperature ≤ -15 °C for 20 minutes. During this time PhSH was purged for 5 minutes with N<sub>2</sub>. Excess PhSH (3.3 mL, 32 mmol, 80 eq.) was added to the cooled reaction. The reaction flask was subsequently allowed to warm-up to 15 °C overnight in the dark. The reaction mixture was concentrated *in vacuo* and the remaining crude was diluted with pentane/Et<sub>2</sub>O (1/1 v/v) and extracted with H<sub>2</sub>O (2x). The combined aqueous layers were concentrated *in vacuo* and purification by Grace flash chromatography on a 15 g silica cartridge using DCM/MeOH (0 to 10% MeOH in DCM) gave the title compound (92 mg, 0.32 mmol, 80%). The NMR shows the ratio of equatorial and axial is 1/1.5. HRMS (ESI) *m/z* calcd for C<sub>13</sub>H<sub>18</sub>O<sub>5</sub>SNa [M+Na]<sup>+</sup>: 309.0767, found: 309.0767. Reported NMR data is for the major isomer. <sup>1</sup>H NMR (400 MHz, Methanol-*d*<sub>4</sub>) δ = 7.70 – 7.65 (m, 1H), 7.64 – 7.59 (m, 2H), 7.39 – 7.24 (m, 2H), 4.65 (d, *J*=3.5, 1H), 4.01 – 3.96 (m, 1H), 3.93 – 3.64 (m, 5H), 3.44 (s, 3H). <sup>13</sup>C NMR (101 MHz, Methanol-*d*<sub>4</sub>) δ = 140.6, 135.8, 132.4, 129.7, 129.7, 100.5, 70.6, 69.0, 67.9, 62.4, 61.7, 55.4.

#### Methyl 3-S-benzyl-3-deoxy- $\alpha$ -D-allo/glucoopyranoside (**3c**)

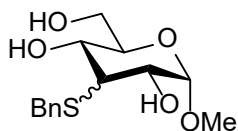

A 100 mL flask equipped with a magnetic stir bar was charged with trityl hydrazone **1**<sup>[5]</sup> (189 mg, 0.40 mmol, 1.0 eq.) and THF (4 mL). The resulting solution was evacuated and backfilled with N<sub>2</sub> (3 times) and then cooled to -20 °C (external temperature). *tert*-Butyl hypochlorite (1.24 M in DCM, 0.35 mL, 1.1 eq.) was added dropwise to the cooled solution of hydrazone and stirred for 15 minutes. The resulting light-yellow solution was then frozen in a liquid N<sub>2</sub> bath and degassed by two freeze-pump-thaw cycles, each time thawing in a -20 °C bath. After backfilling with N<sub>2</sub>, the reaction was maintained at an external temperature ≤ -15 °C for 20 minutes. During this time BnSH was purged for 5 minutes with N<sub>2</sub>. Excess BnSH (3.8 mL, 32 mmol, 80 eq.) was added to the cooled reaction. The reaction flask was subsequently allowed to warm-up to 15 °C overnight in the dark. The reaction mixture was concentrated *in vacuo* and the remaining crude was diluted with pentane/Et<sub>2</sub>O (1/1 v/v) and extracted with H<sub>2</sub>O (2x). The combined aqueous layers were concentrated *in vacuo* and purification by Grace flash chromatography on a 15 g silica cartridge using DCM/MeOH (0 to 10% MeOH in DCM) gave the title compound (101 mg, 0.34 mmol, 84%). The NMR shows the ratio of equatorial and axial is 1/5.1. HRMS (ESI) *m/z* calcd for C<sub>14</sub>H<sub>20</sub>O<sub>5</sub>SNa [M+Na]<sup>+</sup>: 323.0924, found: 323.0921. Reported NMR data is for the major isomer. <sup>1</sup>H NMR (400 MHz, Methanol-*d*<sub>4</sub>) δ = 7.45 – 7.37 (m, 2H), 7.34 – 7.28 (m, 2H), 7.26 – 7.18 (m, 1H), 4.54 (d, *J*=3.5, 1H), 3.92 – 3.84 (m, 2H), 3.84 – 3.79 (m, 2H), 3.79 – 3.71 (m, 3H), 3.41 – 3.38 (m, 1H), 3.36 (s, 3H). <sup>13</sup>C NMR (101 MHz, Methanol-*d*<sub>4</sub>) δ = 139.9, 130.3, 129.4, 127.9, 100.4, 70.4, 68.9, 68.7, 62.5, 55.9, 55.3, 40.7.

### Methyl 3-*S*-acetyl-3-deoxy- $\alpha$ -D-allo/glucofuranoside (**3d**)

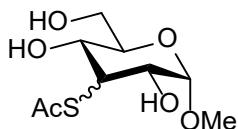

A 100 mL flask equipped with a magnetic stir bar was charged with trityl hydrazone **1**<sup>[5]</sup> (186 mg, 0.40 mmol, 1.0 eq.) and THF (4 mL). The resulting solution was evacuated and backfilled with N<sub>2</sub> (3 times) and then cooled to -20 °C (external temperature). *tert*-Butyl hypochlorite (1.24 M in DCM, 0.35 mL, 1.1 eq.) was added dropwise to the cooled solution of hydrazone and stirred for 15 minutes. The resulting light-yellow solution was then frozen in a liquid N<sub>2</sub> bath and degassed by two freeze-pump-thaw cycles, each time thawing in a -20 °C bath. After backfilling with N<sub>2</sub>, the reaction was maintained at an external temperature  $\leq$  -15 °C for 20 minutes. During this time AcSH was purged for 5 minutes with N<sub>2</sub>. Excess AcSH (2.3 mL, 32 mmol, 80 eq.) was added to the cooled reaction. The reaction flask was subsequently allowed to warm-up to 5 °C over 7.5 h in the dark, after which TLC analysis showed full conversion. The reaction mixture was concentrated *in vacuo* and purification by Grace flash chromatography on a 15 g silica cartridge using DCM/MeOH (0 to 10% MeOH in DCM) gave the title compound (65 mg, 0.26 mmol, 64%). The NMR shows the ratio of equatorial and axial is 1.3/1.0. Analysis was in agreement with literature.<sup>[5]</sup>

### Synthesis of Xylose derivatives

#### Methyl 3-deoxy-3-*S*-ethyl- $\alpha$ -D-ribose/xylofuranoside (**8a**)

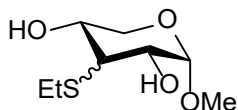

A 100 mL flask equipped with a magnetic stir bar was charged with trityl hydrazone **7**<sup>[5]</sup> (167 mg, 0.38 mmol, 1.0 eq.) and THF (4 mL). The resulting yellow solution was evacuated and backfilled with N<sub>2</sub> (3 times) and then cooled to -20 °C (external temperature), *tert*-butyl hypochlorite (1.24 M in DCM, 0.35 mL, 1.1 eq.) was added dropwise over 1 minute to the cooled solution of hydrazone and stirred for 15 minutes. The resulting light-yellow solution was then frozen in a liquid N<sub>2</sub> bath and degassed by two freeze-pump-thaw cycles, each time thawing in a -20 °C bath. After backfilling with N<sub>2</sub>, the reaction was maintained at an external temperature  $\leq$  -15 °C for 35 minutes. During this time EtSH was degassed in a separated flask by purging with N<sub>2</sub> for 5 minutes, after which 2.3 mL (30.4 mmol, 80 eq.) was added to the cooled reaction. The reaction flask was subsequently allowed to warm-up to -5 °C overnight in the dark. The reaction mixture was concentrated *in vacuo* and purified by Grace flash chromatography on a 15 g silica cartridge using heptane/EtOAc (0 to 100% EtOAc in heptane). The products were obtained as an oil (40 mg, 0.19 mmol, 50%). Two fraction were collected of which one fraction contains the axial product and the other contains a mixture of axial- and equatorial-product. The ratio between equatorial- and axial-product is 1/5.3. **3-equatorial/3-axial mix**: HRMS (ESI) *m/z* calcd for C<sub>8</sub>H<sub>16</sub>O<sub>4</sub>SNa [M+Na]<sup>+</sup>: 231.0662, found: 231.0660. **3-equatorial**: <sup>1</sup>H NMR (400 MHz, Methanol-*d*<sub>4</sub>)  $\delta$  4.61 (d, *J* = 3.5 Hz, 1H), 3.65 – 3.59 (m, 1H), 3.50 – 3.46 (m, 2H), 3.45 – 3.42 (m, 4H), 2.81 – 2.69 (m, 3H), 1.28 (t, *J* = 7.4 Hz, 3H). <sup>13</sup>C NMR (101 MHz, Methanol-*d*<sub>4</sub>)  $\delta$  100.6, 72.3, 69.9, 63.9, 55.5, 53.8, 49.6, 49.4, 49.2, 49.0, 48.8, 48.6, 48.4, 26.5, 15.3. **3-Axial**: HRMS (ESI) *m/z* calcd for C<sub>6</sub>H<sub>11</sub>ClO<sub>4</sub>Na [M+Na]<sup>+</sup>: 231.06620, found: 231.0660. <sup>1</sup>H NMR (400 MHz, Methanol-*d*<sub>4</sub>)  $\delta$  4.39 (d, *J* = 1.8 Hz, 1H), 3.92 (dd, *J* = 11.8, 4.7 Hz, 1H), 3.85 – 3.78 (m, 2H), 3.56 (dd, *J* = 11.8, 2.3 Hz, 1H), 3.48 (s, 3H), 3.12 (t, *J* = 3.3 Hz, 1H), 2.69 – 2.55 (m, 2H), 1.28 (t, *J* = 7.4 Hz, 3H). <sup>13</sup>C NMR (101 MHz, Methanol-*d*<sub>4</sub>)  $\delta$  102.8, 70.8, 68.7, 67.3, 56.4, 52.0, 27.2, 15.3.

#### Methyl 3-*S*-benzyl-3-deoxy- $\alpha$ -D-ribose/xylofuranoside (**8b**)

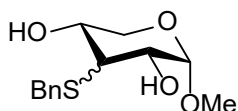

A 100 mL flask equipped with a magnetic stir bar was charged with trityl hydrazone **7**<sup>[5]</sup> (167 mg, 0.38 mmol, 1.0 eq.) and THF (4 mL). The resulting yellow solution was evacuated and backfilled with N<sub>2</sub> (3 times) and then cooled to -20 °C (external temperature), *tert*-butyl hypochlorite (1.24 M in DCM, 0.35 mL, 1.1 eq.) was added dropwise over 1 minute to the cooled solution of hydrazone and stirred for 15 minutes. The resulting light yellow solution was then frozen in a liquid N<sub>2</sub> bath and degassed by two freeze-pump-thaw cycles, each time thawing in a -20 °C bath. After backfilling with N<sub>2</sub>, the reaction was maintained at an external temperature  $\leq$  -15 °C for 35 minutes. During this time BnSH was degassed in a separated flask by purging with N<sub>2</sub> for 5 minutes, after which

3.6 mL (30.4 mmol, 80 eq.) was added to the cooled reaction. The reaction flask was subsequently allowed to warm-up to -5 °C overnight in the dark. The reaction mixture was concentrated *in vacuo* and the remaining crude was diluted with pentane/Et<sub>2</sub>O (1/1 v/v) and extracted with H<sub>2</sub>O (2x). The combined aqueous layers were concentrated *in vacuo* and the mixture was purified by Grace flash chromatography on a 15 g silica cartridge using heptane/EtOAc (0 to 70% EtOAc in heptane). The products were obtained as an oil (32 mg, 0.14 mmol, 38%). The equatorial- and axial-products were isolated separately with a ratio of 1/5. **3-equatorial**: HRMS (ESI) *m/z* calcd for C<sub>13</sub>H<sub>18</sub>O<sub>4</sub>SNa [M+Na]<sup>+</sup>: 293.0818, found: 293.0814. <sup>1</sup>H NMR (400 MHz, Methanol-*d*<sub>4</sub>) δ = 7.42 – 7.12 (m, 5H), 4.59 (d, *J*=3.5, 1H), 3.97 (d, *J*=1.5, 2H), 3.61 – 3.55 (m, 1H), 3.52 – 3.42 (m, 4H), 3.41 (s, 3H), 2.86 – 2.79 (m, 1H). <sup>13</sup>C NMR (101 MHz, Methanol-*d*<sub>4</sub>) δ = 140.0, 130.2, 129.4, 127.9, 100.7, 72.5, 70.0, 64.0, 55.5, 53.9, 49.4, 49.2, 49.0, 48.8, 48.6, 37.0. **3-axial**: HRMS (ESI) *m/z* calcd for C<sub>13</sub>H<sub>18</sub>O<sub>4</sub>SNa [M+Na]<sup>+</sup>: 293.0818, found: 293.0815. <sup>1</sup>H NMR (400 MHz, Methanol-*d*<sub>4</sub>) δ = 7.39 – 7.19 (m, 5H), 4.26 (d, *J*=1.6, 1H), 3.90 (dd, *J*=11.9, 4.4, 1H), 3.85 – 3.75 (m, 2H), 3.75 – 3.68 (m, 2H), 3.47 (dd, *J*=11.9, 2.1, 1H), 3.43 (s, 3H), 2.99 (t, *J*=3.1, 1H). <sup>13</sup>C NMR (101 MHz, Methanol-*d*<sub>4</sub>) δ = 139.9, 130.1, 129.5, 128.0, 102.8, 70.8, 68.8, 56.5, 49.2, 49.0, 48.8, 48.6, 37.2.

#### Methyl 3-*S*-acetyl-3-deoxy- $\alpha$ -D-ribose/xylopyranoside (**8c**)

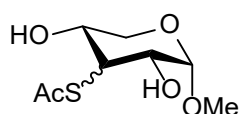

A 100 mL flask equipped with a magnetic stir bar was charged with trityl hydrazone **7**<sup>[5]</sup> (167 mg, 0.38 mmol, 1.0 eq.) and THF (4 mL). The resulting yellow solution was evacuated and backfilled with N<sub>2</sub> (3 times) and then cooled to -20 °C (external temperature), *tert*-butyl hypochlorite (1.24 M in DCM, 0.35 mL, 1.1 eq.) was added dropwise over 1 minute to the cooled solution of hydrazone and stirred for 15 minutes. The resulting light yellow solution was then frozen in a liquid N<sub>2</sub> bath and degassed by two freeze-pump-thaw cycles, each time thawing in a -20 °C bath. After backfilling with N<sub>2</sub>, the reaction was maintained at an external temperature ≤ -15 °C for 35 minutes. During this time AcSH was degassed in a separated flask by purging with N<sub>2</sub> for 5 minutes, after which 2.3 mL (30.4 mmol, 80 eq.) was added to the cooled reaction. The reaction flask was subsequently allowed to warm-up to -5 °C overnight in the dark. The reaction mixture was concentrated *in vacuo* and purified by Grace flash chromatography on a 15 g silica cartridge using heptane/EtOAc (0 to 100% EtOAc in heptane). The products were obtained as an oil (32 mg, 0.14 mmol, 38%). The product was isolated as a mixture of equatorial- and axial-product, with a ratio of 1.5/1. Reported NMR data is for the major isomer. HRMS (ESI) *m/z* calcd for C<sub>8</sub>H<sub>13</sub>O<sub>6</sub>S [M-H]<sup>-</sup>: 221.0489, found: 221.0486. <sup>1</sup>H NMR (400 MHz, Methanol-*d*<sub>4</sub>) δ 4.62 (d, *J* = 3.5 Hz, 1H), 3.72 – 3.65 (m, 1H), 3.64 – 3.56 (m, 2H), 3.56 – 3.49 (m, 2H), 3.44 (s, 3H), 2.35 (s, 3H). <sup>13</sup>C NMR (101 MHz, Methanol-*d*<sub>4</sub>) δ 197.5, 197.2, 100.5, 100.5, 70.9, 68.9, 63.9, 55.5, 52.3, 49.4, 49.2, 49.0, 48.8, 48.6, 30.7.

#### Synthesis of Gal derivative

##### Methyl 4-*S*-acetyl-4-deoxy- $\alpha$ -D-galacto/gluco-pyranoside (**10**)

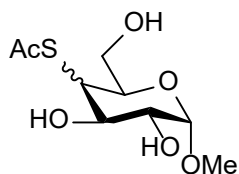

A 100 mL flask equipped with a magnetic stir bar was charged with trityl hydrazone **9**<sup>[5]</sup> (179 mg, 0.40 mmol, 1.0 eq.) and THF (4 mL). The resulting yellow solution was evacuated and backfilled with N<sub>2</sub> (3 times) and then cooled to -20 °C (external temperature), *tert*-butyl hypochlorite (1.24 M in DCM, 0.35 mL, 1.1 eq.) was added dropwise over 1 minute to the cooled solution of hydrazone and stirred for 25 minutes. The resulting light yellow solution was then frozen in a liquid N<sub>2</sub> bath and degassed by two freeze-pump-thaw cycles, each time thawing in a -20 °C bath. After backfilling with N<sub>2</sub>, the reaction was maintained at an external temperature ≤ -15 °C for 30 minutes. During this time AcSH was degassed in a separated flask by purging with N<sub>2</sub> for 5 minutes, after which 2.3 mL (32 mmol, 80 eq.) was added to the cooled reaction. The reaction flask was subsequently allowed to warm-up to -5 °C overnight in the dark. The reaction mixture was concentrated *in vacuo* purified by Grace flash chromatography on a 15 g silica cartridge using DCM/MeOH (0 to 10% MeOH in DCM). Three fractions were obtained: I) 12 mg methyl 4-chloro-4-deoxy- $\alpha$ -D-galacto/gluco-pyranoside **S9**<sup>[5]</sup> (58  $\mu$ mol, 15%, eq/ax ratio: 1/1.4); II) 22 mg **10** (88  $\mu$ mol, 22%, eq/ax 1/3.7); III) 28 mg **S10** (0.16 mmol, 40%). The equatorial and axial product could not be separated. HRMS (ESI) *m/z* calcd for C<sub>9</sub>H<sub>16</sub>O<sub>6</sub>SNa [M+Na]<sup>+</sup>: 275.0560, found:

275.0554. Reported NMR data is for the major isomer (axial).  $^1\text{H}$  NMR (400 MHz, Methanol- $d_4$ )  $\delta$  4.77 (d,  $J$  = 3.7 Hz, 1H), 3.75 – 3.63 (m, 3H), 3.59 (dd,  $J$  = 12.1, 6.5 Hz, 1H), 3.48 (dd,  $J$  = 9.3, 3.6 Hz, 1H), 3.42 (s, 3H), 3.41 – 3.36 (m, 1H), 2.37 (s, 3H).  $^{13}\text{C}$  NMR (101 MHz, Methanol- $d_4$ )  $\delta$  196.2, 101.2, 74.8, 73.0, 71.3, 63.4, 55.6, 48.0, 30.6.

#### Methyl 3-keto-3,4-deoxy- $\alpha$ -D-glucopyranoside (S10)

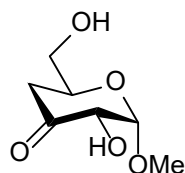

Compound **S10** was isolated during the synthesis of **10**.  $^1\text{H}$  NMR (400 MHz, Methanol- $d_4$ )  $\delta$  5.07 (d,  $J$  = 4.1 Hz, 1H), 4.33 (dd,  $J$  = 4.1, 1.3 Hz, 1H), 4.08 – 4.00 (m, 1H), 3.69 (dd,  $J$  = 11.8, 3.5 Hz, 1H), 3.62 (dd,  $J$  = 11.9, 5.2 Hz, 1H), 3.42 (s, 3H), 2.71 – 2.61 (m, 1H), 2.38 (dd,  $J$  = 13.9, 3.0 Hz, 1H).  $^{13}\text{C}$  NMR (101 MHz, Methanol- $d_4$ )  $\delta$  206.4, 103.9, 76.9, 71.8, 65.0, 55.7, 43.3. NMR analysis in DMSO- $d_6$  was in agreement with literature.<sup>[6]</sup>

#### Synthesis of maltose derivatives

##### 4-*tert*-butylbenzyl-3-*S*-benzyl-3-deoxy- $\alpha$ -D-maltoside (**12**)

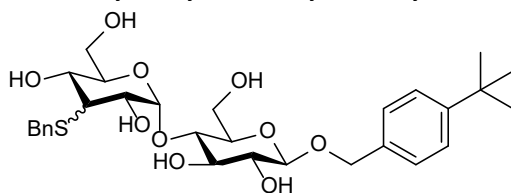

A 100 mL flask equipped with a magnetic stir bar was charged with trityl hydrazone **11**<sup>[5]</sup> (196 mg, 0.26 mmol, 1.0 eq.) and THF (2.6 mL). The resulting solution was evacuated and backfilled with  $\text{N}_2$  (3 times) and then cooled to  $-20\text{ }^\circ\text{C}$  (external temperature). *tert*-Butyl hypochlorite (1.24 M in DCM, 0.23 mL, 1.1 eq.) was added dropwise to the cooled solution of

hydrazone and stirred for 15 minutes. The resulting light-yellow solution was then frozen in a liquid  $\text{N}_2$  bath and degassed by two freeze-pump-thaw cycles, each time thawing in a  $-20\text{ }^\circ\text{C}$  bath. After backfilling with  $\text{N}_2$ , the reaction was maintained at an external temperature  $\leq -15\text{ }^\circ\text{C}$  for 20 minutes. During this time BnSH was degassed by purging with  $\text{N}_2$  for 5 minutes. Excess BnSH (2.4 mL, 32 mmol, 80 eq.) was added to the cooled reaction. The reaction flask was subsequently allowed to warm-up to  $-5\text{ }^\circ\text{C}$  overnight in the dark. The reaction mixture was concentrated *in vacuo* and the remaining crude was diluted with pentane/Et $_2$ O (1/1 v/v) and extracted with  $\text{H}_2\text{O}$  (2x). The combined aqueous layers were concentrated *in vacuo* and the mixture was purified by Grace flash chromatography on a 15 g silica cartridge using DCM/MeOH (0 to 10% MeOH in DCM). The title compound was obtained as an oil (86 mg, 0.15 mmol, 57%, eq/ax 1/5). The equatorial- and axial-products were partially isolated. **3-equatorial**: HRMS (ESI)  $m/z$  calcd for  $\text{C}_{30}\text{H}_{42}\text{O}_{10}\text{SNa}$  [ $\text{M}+\text{Na}$ ] $^+$ : 617.2390, found: 617.2377.  $^1\text{H}$  NMR (400 MHz, Methanol- $d_4$ )  $\delta$  7.44 – 7.19 (m, 9H), 5.16 (d,  $J$  = 3.3 Hz, 1H), 4.90 (d,  $J$  = 11.7 Hz, 1H), 4.66 (d,  $J$  = 11.6 Hz, 1H), 4.39 (d,  $J$  = 7.8 Hz, 1H), 4.05 – 3.90 (m, 3H), 3.88 – 3.78 (m, 2H), 3.73 – 3.64 (m, 2H), 3.64 – 3.53 (m, 3H), 3.42 – 3.28 (m, 3H), 2.86 (t,  $J$  = 10.7 Hz, 1H), 1.33 (s, 9H).  $^{13}\text{C}$  NMR (101 MHz, Methanol- $d_4$ )  $\delta$  139.8, 130.3, 129.4, 129.2, 128.0, 126.2, 103.1, 102.3, 81.4, 77.8, 76.7, 75.6, 74.7, 73.2, 71.6, 69.5, 62.9, 62.2, 53.5, 36.9, 35.4, 31.8. **3-axial**: HRMS (ESI)  $m/z$  calcd for  $\text{C}_{30}\text{H}_{43}\text{O}_{10}\text{S}$  [ $\text{M}+\text{H}$ ] $^+$ : 595.2571, found: 595.2561.  $^1\text{H}$  NMR (400 MHz, Methanol- $d_4$ )  $\delta$  7.42 – 7.19 (m, 9H), 5.13 (d,  $J$  = 3.4 Hz, 1H), 4.90 (overlap with  $\text{H}_2\text{O}$  peak, 1H), 4.63 (d,  $J$  = 11.6 Hz, 1H), 4.36 (d,  $J$  = 7.8 Hz, 1H), 3.95 – 3.85 (m, 6H), 3.83 – 3.70 (m, 3H), 3.68 – 3.55 (m, 2H), 3.41 – 3.36 (m, 1H), 3.36 – 3.32 (m, 1H), 3.31 – 3.26 (m, 1H), 1.33 (d,  $J$  = 2.1 Hz, 9H).  $^{13}\text{C}$  NMR (101 MHz, Methanol- $d_4$ )  $\delta$  151.8, 139.9, 135.9, 130.4, 129.4, 129.1, 127.9, 126.1, 103.1, 101.1, 79.2, 77.8, 76.7, 75.0, 71.7, 71.6, 69.4, 68.9, 62.6, 62.2, 55.2, 40.7, 35.3, 31.8.

#### Synthesis of S13 and S14

##### Methyl-2,4,6-*O*-acetyl-3-(trityl)hydrazone- $\alpha$ -D-glucopyranoside (S13)

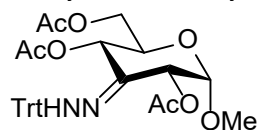

To a solution of **1**<sup>[5]</sup> (0.30 g, 0.67 mmol, 1.0 eq.) in pyridine (3.3 mL) was added DMAP (11 mg, 90  $\mu\text{mol}$ , 0.14 eq.) and  $\text{Ac}_2\text{O}$  (0.19 mL, 2.0 mmol, 3.0 eq.) at  $0\text{ }^\circ\text{C}$ , after which the reaction was allowed to warm-up to room temperature and stirred for three hours.

The reaction mixture was quenched by the addition of MeOH at  $0\text{ }^\circ\text{C}$  and diluted with EtOAc. The organic layer was washed with sat. aq.  $\text{NaHCO}_3$  (1x), brine (1x), dried over  $\text{Na}_2\text{SO}_4$ , filtered, and concentrated *in vacuo*. Purification by Grace flash chromatography on a 15 g silica cartridge with heptane/EtOAc (0 to 100% EtOAc in heptane) gave the title compound (0.21 g, 0.32 mmol, 47%). HRMS (ESI pos)  $m/z$  calcd for

$C_{32}H_{35}N_2O_8$  [M+H]<sup>+</sup>: 575.2388, found: 575.2374. <sup>1</sup>H NMR (400 MHz, Chloroform-*d*)  $\delta$  7.73 (s, 1H), 7.34 – 7.18 (m, 15H), 5.57 (d, *J* = 3.3 Hz, 1H), 5.04 (d, *J* = 9.3 Hz, 1H), 4.83 (d, *J* = 3.3 Hz, 1H), 4.18 (d, *J* = 3.8 Hz, 2H), 3.82 (dt, *J* = 9.0, 3.7 Hz, 1H), 3.32 (s, 3H), 2.08 (s, 6H), 1.54 (s, 2H). <sup>13</sup>C NMR (101 MHz, Chloroform-*d*)  $\delta$  170.7, 169.4, 169.0, 145.8, 130.0, 129.3, 129.2, 127.7, 127.6, 126.7, 97.7, 73.2, 72.8, 70.3, 69.2, 62.6, 55.2, 20.8, 20.8, 20.3.

#### Methyl 2,4,6-tri-*O*-acetyl-3-chloro-3-deoxy- $\alpha$ -D-allo/glucofuranoside (**S14**)

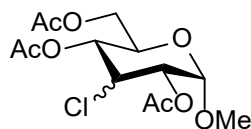

A 100 mL flask equipped with a magnetic stir bar was charged with trityl hydrazone **S13** (113 mg, 0.20 mmol, 1.0 eq.) and THF (2.0 mL). The resulting solution was evacuated and backfilled with N<sub>2</sub> (3 times) and then cooled to -20 °C (external temperature). *tert*-Butyl hypochlorite (1.24 M in DCM, 0.18 mL, 1.1 eq.) was added dropwise to the cooled solution of hydrazone and stirred for 15 minutes. The resulting light-yellow solution was then frozen in a liquid N<sub>2</sub> bath and degassed by two freeze-pump-thaw cycles, each time thawing in a -20 °C bath. After backfilling with N<sub>2</sub>, the reaction was maintained at an external temperature  $\leq$  -15 °C for 20 minutes. During this time BnSH was degassed by purging with N<sub>2</sub> for 5 minutes. Excess BnSH (1.8 mL, 16 mmol, 80 eq.) was added to the cooled reaction. The reaction flask was subsequently allowed to warm-up to 15 °C overnight in the dark. The reaction mixture was concentrated *in vacuo* and the remaining crude was dissolved in MeCN (+/- 5 mL) and washed several times with heptane (total of 150 mL) till TLC analysis showed that all benzyl thiol was removed. The MeCN layer was concentrated *in vacuo* and purification by Grace flash chromatography on a 15 g silica cartridge using heptane/EtOAc (0 to 40% EtOAc in heptane) gave the title compound (29 mg, 86  $\mu$ mol, 44%, eq/ax 3/1). The equatorial- and axial-products were isolated separately. **3-equatorial**: HRMS (ESI pos) *m/z* calcd for C<sub>13</sub>H<sub>19</sub>O<sub>8</sub>ClNa [M+Na]<sup>+</sup>: 361.0661 and 363.0631, found: 361.0662 and 363.0632. <sup>1</sup>H NMR (400 MHz, Chloroform-*d*)  $\delta$  5.16 (t, *J* = 10.1 Hz, 1H), 4.97 (dd, *J* = 10.9, 3.6 Hz, 1H), 4.90 (d, *J* = 3.5 Hz, 1H), 4.29 – 4.18 (m, 2H), 4.10 (dd, *J* = 12.3, 2.4 Hz, 1H), 3.89 (ddd, *J* = 10.0, 4.7, 2.4 Hz, 1H), 3.40 (s, 3H), 2.15 (s, 3H), 2.11 (s, 3H), 2.10 (s, 3H). <sup>13</sup>C NMR (101 MHz, Chloroform-*d*)  $\delta$  170.8, 170.1, 169.4, 96.9, 72.7, 70.4, 68.2, 62.1, 58.1, 55.6, 20.9, 20.8, 20.7. **3-axial**: HRMS (ESI pos) *m/z* calcd for C<sub>13</sub>H<sub>19</sub>O<sub>8</sub>ClNa [M+Na]<sup>+</sup>: 361.0661 and 363.0631, found: 361.0660 and 363.0630. <sup>1</sup>H NMR (400 MHz, Chloroform-*d*)  $\delta$  5.09 (t, *J* = 4.1 Hz, 1H), 4.97 (dd, *J* = 9.3, 3.6 Hz, 1H), 4.88 (d, *J* = 4.2 Hz, 1H), 4.81 (t, *J* = 3.8 Hz, 1H), 4.40 – 4.31 (m, 2H), 4.27 – 4.18 (m, 1H), 3.45 (s, 3H), 2.18 (s, 3H), 2.11 (s, 3H), 2.10 (s, 3H). <sup>13</sup>C NMR (101 MHz, Chloroform-*d*)  $\delta$  170.8, 170.0, 169.6, 97.4, 67.8, 67.0, 63.4, 62.2, 56.8, 56.2, 20.9, 20.9, 20.8.

#### Synthesis of $\beta$ -Glc derivative

##### Methyl 3-*S*-benzyl-3-deoxy- $\beta$ -D-allo/glucofuranoside (**14**)

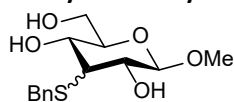

A 100 mL flask equipped with a magnetic stir bar was charged with trityl hydrazone **13**<sup>[5]</sup> (193 mg, 0.40 mmol, 1.0 eq.) and THF (4 mL). The resulting solution was evacuated and backfilled with N<sub>2</sub> (3 times) and then cooled to -20 °C (external temperature). *tert*-Butyl hypochlorite (1.24 M in DCM, 0.35 mL, 1.1 eq.) was added dropwise to the cooled solution of hydrazone and stirred for 15 minutes. The resulting light-yellow solution was then frozen in a liquid N<sub>2</sub> bath and degassed by two freeze-pump-thaw cycles, each time thawing in a -20 °C bath. After backfilling with N<sub>2</sub>, the reaction was maintained at an external temperature  $\leq$  -15 °C for 20 minutes. During this time BnSH was purged for 5 minutes with N<sub>2</sub>. Excess BnSH (3.8 mL, 32 mmol, 80 eq.) was added to the cooled reaction. The reaction flask was subsequently allowed to warm-up to 15 °C overnight in the dark. The reaction mixture was concentrated *in vacuo* and the remaining crude was diluted with pentane/Et<sub>2</sub>O (1/1 v/v) and extracted with H<sub>2</sub>O (2x). The combined aqueous layers were concentrated *in vacuo* and purification by Grace flash chromatography on a 15 g silica cartridge using DCM/MeOH (0 to 10% MeOH in DCM) gave a mixture of the title compound (25 mg, 83  $\mu$ mol, 21%, eq/ax 1/1.1) and rearrangement side product **S15** (4 mg, 20  $\mu$ mol, 5%). Methyl 3-chloro-3-deoxy- $\beta$ -D-allo/glucofuranoside **15**<sup>[5]</sup> (46 mg, 0.22 mmol, 54%, eq/ax 1.8/1) was also isolated. The reported NMR data is for the equatorial isomer, not all signals are given due to overlap. HRMS (ESI) *m/z* calcd for C<sub>14</sub>H<sub>20</sub>O<sub>5</sub>Sn [M+Na]<sup>+</sup>: 323.0924, found: 323.0932. <sup>1</sup>H NMR (400 MHz, Methanol-*d*<sub>4</sub>)  $\delta$  7.44 – 7.20 (m, 5H), 4.20 (d, *J* = 7.5 Hz, 1H), 4.00 (s, 2H), 3.83 – 3.76 (m, 1H), 3.74 – 3.67 (m, 2H), 3.55 (s, 3H), 3.40 – 3.31 (m, 1H), 3.27 (dd, *J* = 10.7, 7.6 Hz, 1H),

2.61 – 2.54 (m, 1H). <sup>13</sup>C NMR (101 MHz, Methanol-*d*<sub>4</sub>) δ 139.8, 130.3, 129.4, 127.9, 106.6, 73.9, 62.9, 57.2, 56.8, 36.8.

#### Rearrangement side product (S15)

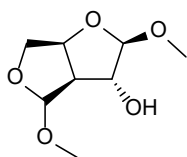

Compound **S15** was isolated as a minor product during the synthesis of **14**. Peaks of OMe are not given due to overlap with **14**. <sup>1</sup>H NMR (400 MHz, Methanol-*d*<sub>4</sub>) δ 5.01 (d, *J* = 1.5 Hz, 1H), 4.96 (dd, *J* = 6.5, 3.5 Hz, 1H), 4.82 (s, 1H), 4.22 – 4.16 (m, 1H), 3.95 – 3.92 (m, 1H), 3.92 – 3.86 (m, 1H), 2.63 (d, *J* = 6.4 Hz, 1H). <sup>13</sup>C NMR (101 MHz, Methanol-*d*<sub>4</sub>) δ 111.8, 109.4, 85.3, 79.5, 74.0, 59.6.

#### S-glycosides synthesis

##### Methyl 2,3,4,6-tri-*O*-acetyl-3-*S*-acetyl-3-deoxy- $\alpha$ -D-allo/glucofuranoside (**S16** + **S17**)

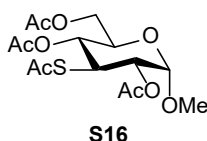

**S16**

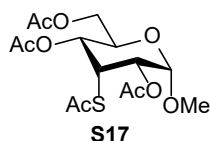

**S17**

To a solution of compound **3d** (0.14 g, 0.54 mmol, 1.0 eq. eq/ax: 1.1/1) in pyridine (1.8 mL) was added Ac<sub>2</sub>O (1.8 mL, 20 mmol, 36 eq.) at 0 °C. After 15 minutes, the reaction mixture was allowed to warm-up to room temperature and stirred for an additional hour. The reaction mixture was quenched by the addition of methanol at 0 °C, diluted with EtOAc and the organic layer was washed with 1 M HCl (2x), sat. aq. NaHCO<sub>3</sub> (2x), brine (1x), dried over Na<sub>2</sub>SO<sub>4</sub>, filtered, and concentrated *in vacuo*. A mixture of the title compounds was obtained in 98% yield (0.20 g, 0.53 mmol). With flash chromatography pentane/EtOAc (0 to 60% EtOAc in pentane) the two compounds could partly be separated to give pure **S16** (32 mg, 85  $\mu$ mol) and pure **S17** (31 mg, 82  $\mu$ mol), together with a mix fraction (0.14 g) that contained both **S16** and **S17**. **S16**: <sup>1</sup>H NMR (400 MHz, Chloroform-*d*) δ 5.05 (dd, *J* = 11.0, 9.9 Hz, 1H), 4.93 (dd, *J* = 11.8, 3.6 Hz, 1H), 4.87 (d, *J* = 3.5 Hz, 1H), 4.21 (dd, *J* = 12.3, 4.7 Hz, 1H), 4.15 – 4.03 (m, 2H), 3.99 (ddd, *J* = 9.9, 4.7, 2.4 Hz, 1H), 3.42 (s, 3H), 2.31 (s, 3H), 2.06 (d, *J* = 8.5 Hz, 6H), 2.00 (s, 3H). <sup>13</sup>C NMR (101 MHz, Chloroform-*d*) δ 193.3, 170.8, 170.1, 169.5, 96.6, 69.8, 68.6, 67.6, 62.4, 55.4, 44.8, 30.8, 20.9, 20.8, 20.7. HRMS (ESI pos) *m/z* calcd for C<sub>15</sub>H<sub>22</sub>O<sub>9</sub>SNa [M+Na]<sup>+</sup>: 401.0877, found: 401.0873. **S17**: <sup>1</sup>H NMR (400 MHz, Chloroform-*d*) δ 5.23 (dd, *J* = 5.1, 3.5 Hz, 1H), 5.13 (dd, *J* = 10.3, 4.2 Hz, 1H), 4.79 (d, *J* = 3.4 Hz, 1H), 4.56 (t, *J* = 4.7 Hz, 1H), 4.26 (dd, *J* = 12.2, 4.7 Hz, 1H), 4.13 (dd, *J* = 12.2, 2.2 Hz, 1H), 4.02 – 3.93 (m, 1H), 3.42 (s, 3H), 2.34 (s, 3H), 2.07 (d, *J* = 4.0 Hz, 6H), 1.93 (s, 3H). <sup>13</sup>C NMR (101 MHz, Chloroform-*d*) δ 195.6, 170.8, 169.7, 169.1, 96.6, 77.5, 77.2, 76.8, 67.5, 65.6, 65.3, 62.1, 55.4, 44.0, 30.4, 20.9, 20.8, 20.7. HRMS (ESI pos) *m/z* calcd for C<sub>15</sub>H<sub>22</sub>O<sub>9</sub>SNa [M+Na]<sup>+</sup>: 401.0877, found: 401.0875.

##### Methyl 3-deoxy-3-thio- $\alpha$ -D-glucopyranoside (**18**)

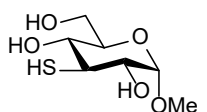

To a solution of **S16** (31 mg, 83  $\mu$ mol, 1.0 eq.) in MeOH (0.4 mL) was added a solution of sodium methoxide in methanol (4.4 M, 38  $\mu$ L, 0.24 mmol, 2.0 eq.). After stirring for one hour, TLC showed full conversion of the starting material. The reaction mixture was neutralized with dowex H<sup>+</sup> resin, filtered and concentrated *in vacuo* to give the title compound (15 mg, 69  $\mu$ mol, 83%). NMR analysis was in agreement with literature.<sup>[7]</sup>

##### Methyl 3-*S*- $\beta$ -D-glucopyranosyl-3-deoxy-3-thio- $\alpha$ -D-glucopyranoside (**20**)

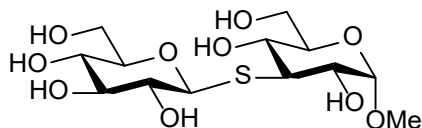

Thiol **18** (15 mg, 69  $\mu$ mol, 1.0 eq.) was dissolved in MilliQ-H<sub>2</sub>O (0.2 mL) and transferred to an Eppendorf containing  $\alpha$ -D-glucopyranosyl fluoride<sup>[7]</sup> (38 mg, 0.21 mmol, 3.0 eq.) and Ca(OH)<sub>2</sub> (15 mg, 0.21 mmol, 3.0 eq.). The reaction was stirred vigorously for five hours, after which the reaction mixture was neutralized with 2 M HCl and concentrated *in vacuo*. Purification by Grace flash chromatography on a 15 g spherical silica cartridge using DCM/MeOH (0 to 30% MeOH in DCM) gave the title compound (12 mg, 32  $\mu$ mol, 47%). HRMS (ESI pos) *m/z* calcd for C<sub>13</sub>H<sub>24</sub>O<sub>10</sub>SNa [M+Na]<sup>+</sup>: 395.0982, found: 395.0984. <sup>1</sup>H NMR (400 MHz, Methanol-*d*<sub>4</sub>) δ 4.72 (d, *J* = 3.5 Hz, 1H), 4.59 (d, *J* = 9.8 Hz, 1H), 3.89 – 3.80 (m, 2H),

3.75 – 3.64 (m, 2H), 3.63 – 3.53 (m, 2H), 3.46 (s, 3H), 3.41 – 3.32 (m, 4H), 3.26 (dd,  $J = 9.6, 8.5$  Hz, 1H), 3.06 (t,  $J = 10.7$  Hz, 1H).  $^{13}\text{C}$  NMR (101 MHz, Methanol- $d_4$ )  $\delta$  100.5, 86.3, 81.9, 79.4, 74.3, 72.2, 71.2, 69.2, 62.8, 62.6, 55.4, 53.6.

#### Methyl 3-deoxy-3-thio- $\alpha$ -D-allopyranoside (**21**)

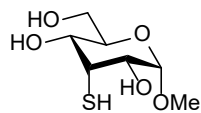

To a solution of **S17** (46 mg, 0.12 mmol, 1.0 eq.) in MeOH (0.6 mL) was added a solution of sodium methoxide in methanol (4.4 M, 55  $\mu\text{L}$ , 0.24 mmol, 2.0 eq.). After stirring for one hour, TLC showed full conversion of the starting material. The reaction mixture was neutralized with dowex  $\text{H}^+$  resin, filtered and concentrated *in vacuo* to give the title compound (18 mg, 84  $\mu\text{mol}$ , 70%). NMR analysis was in agreement with literature.<sup>[7]</sup>

#### Methyl 3-S- $\beta$ -D-glucopyranosyl-3-deoxy-3-thio- $\alpha$ -D-allopyranoside (**22**)

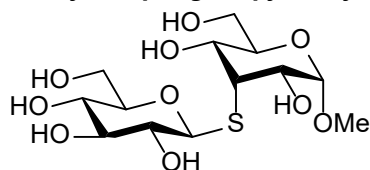

Thiol **21** (18 mg, 84  $\mu\text{mol}$ , 1.0 eq.) was dissolved in MilliQ- $\text{H}_2\text{O}$  (0.1 mL) and transferred to a vial  $\alpha$ -D-glucopyranosyl fluoride<sup>[7]</sup> (46 mg, 0.25 mmol, 3.0 eq.) and  $\text{Ca}(\text{OH})_2$  (19 mg, 0.25 mmol, 3.0 eq.). The reaction was stirred vigorously for five hours, after which the reaction mixture was neutralized with 2 M HCl and concentrated *in vacuo*. Purification by Grace flash chromatography on a 15 g spherical silica cartridge using DCM/MeOH (0 to 30% MeOH in DCM) gave the title compound (12 mg, 33  $\mu\text{mol}$ , 39%). HRMS (ESI pos)  $m/z$  calcd for  $\text{C}_{13}\text{H}_{24}\text{O}_{10}\text{SNa}$   $[\text{M}+\text{Na}]^+$ : 395.0982, found: 395.0982.  $^1\text{H}$  NMR (400 MHz, Methanol- $d_4$ )  $\delta$  4.61 (d,  $J = 3.4$  Hz, 1H), 4.34 (d,  $J = 9.8$  Hz, 1H), 3.99 – 3.93 (m, 1H), 3.91 – 3.76 (m, 3H), 3.75 (t, 1H), 3.72 – 3.61 (m, 3H), 3.40 – 3.34 (m, 4H), 3.37 – 3.29 (m, 3H), 3.30 – 3.23 (m, 1H).  $^{13}\text{C}$  NMR (101 MHz, Methanol- $d_4$ )  $\delta$  100.4, 87.7, 82.2, 79.4, 74.7, 71.3, 70.6, 68.9, 67.9, 62.7, 62.4, 55.3, 53.4.

## Supplemental references

- [1] B. T. Lawton, W. A. Szarek, J. K. N. Jones, *Carbohydr. Res.* **1970**, *15*, 397–402.
- [2] A. H. Haines, *Chem. Commun.* **1998**, 817–818.
- [3] T. Morikawa, K. Tsujihara, M. Takeda, Y. Arai, *Chem. Pharm. Bull.* **1982**, *30*, 4365–4372.
- [4] H. Okazaki, K. Hanaya, M. Shoji, N. Hada, T. Sugai, *Tetrahedron* **2013**, *69*, 7931–7935.
- [5] J. Zhang, N. R. M. Reintjens, J. Dhineshkumar, M. D. Witte, A. J. Minnaard, *Org. Lett.* **2022**, *24*, 5339–5344.
- [6] N. N. H. M. Eisink, M. D. Witte, A. J. Minnaard, *ACS Catal.* **2017**, *7*, 1438–1445.
- [7] P. Wen, P. Jia, Q. Fan, B. J. McCarty, W. Tang, *ChemSusChem* **2022**, *15*, No. e202102483.



## NMR spectra

### NMR spectra of substitution reactions on chloroglycosides

Comparison of  $^1\text{H}$ -NMR between compounds **2-ax**, **2-eq**, **4**, **5**, **S1** in  $\text{CD}_3\text{OD}$ .

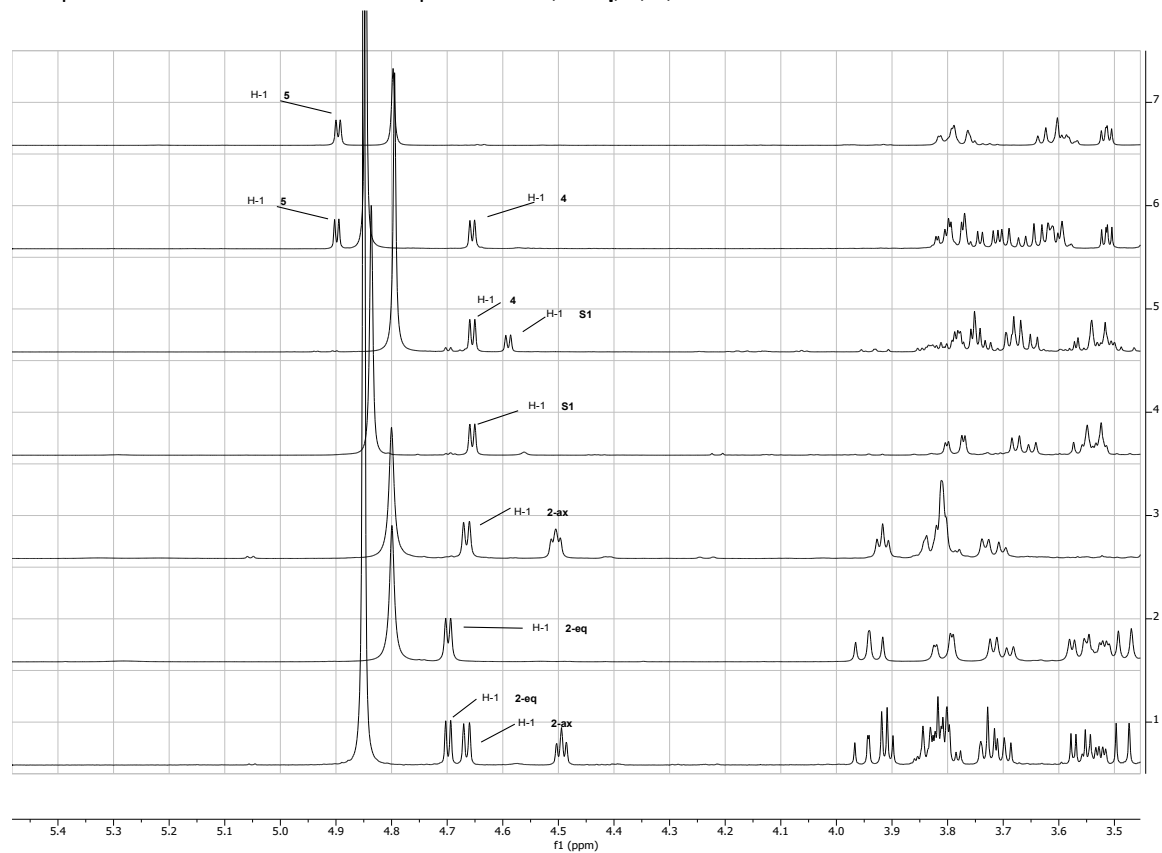

### Methyl 3-azido-3-deoxy- $\alpha$ -D-glucopyranoside (4)

$^1\text{H}$  NMR, 400 MHz,  $\text{CD}_3\text{OD}$  of compound 4

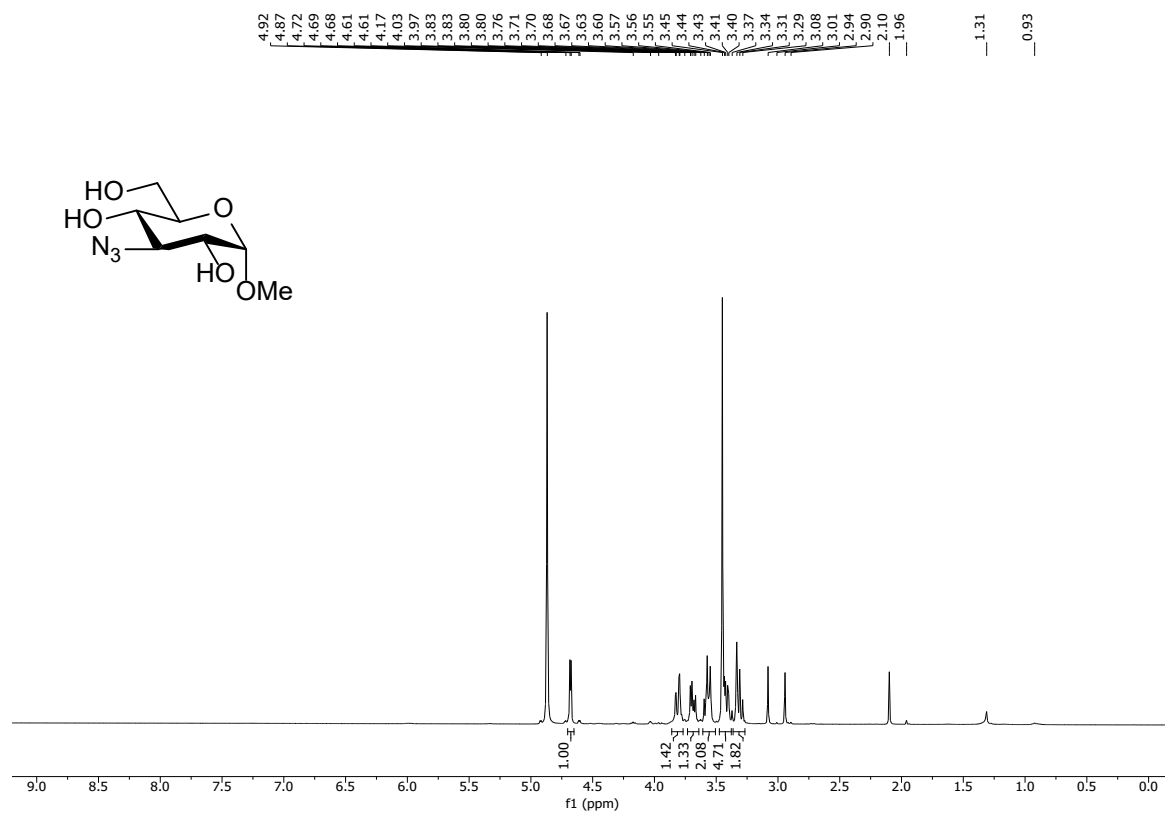

$^{13}\text{C}$  NMR, 101 MHz,  $\text{CD}_3\text{OD}$  of compound 4

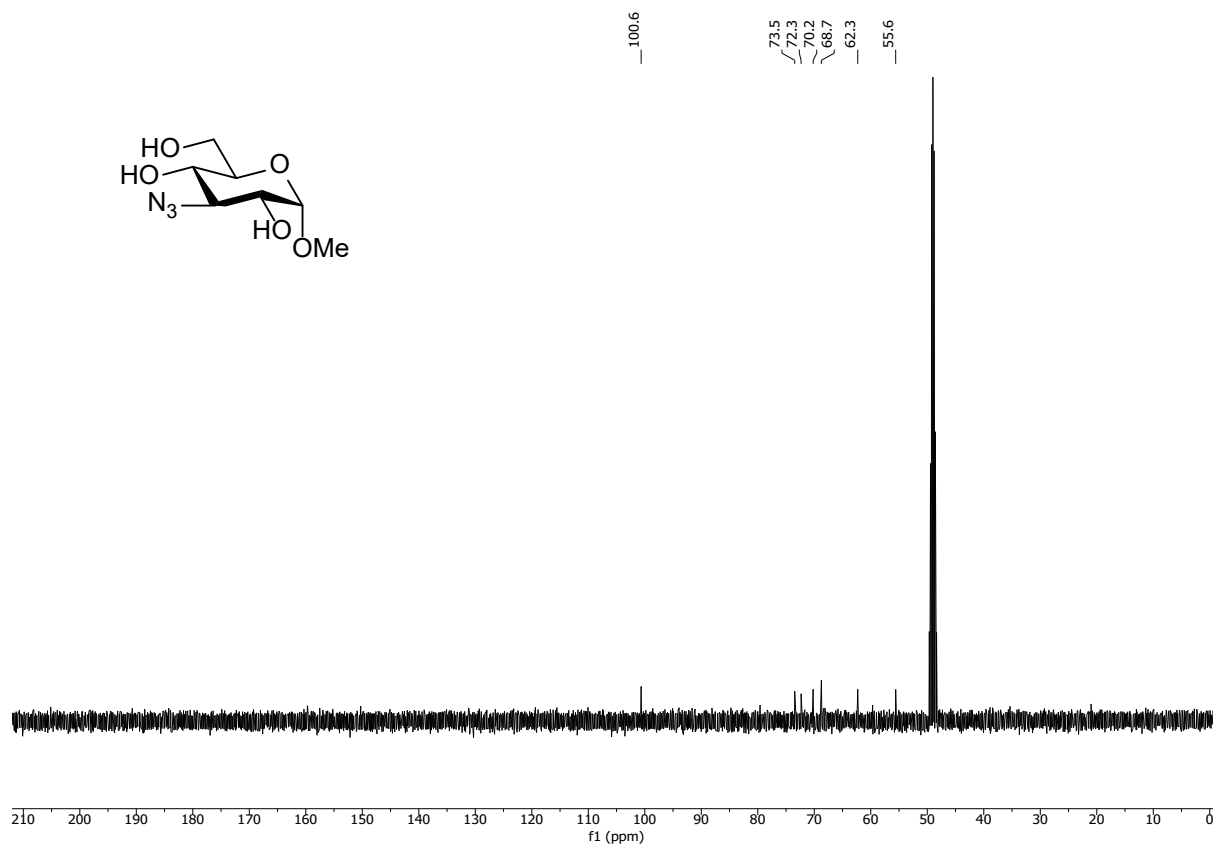

$^1\text{H}$ - $^1\text{H}$  COSY of compound **4**

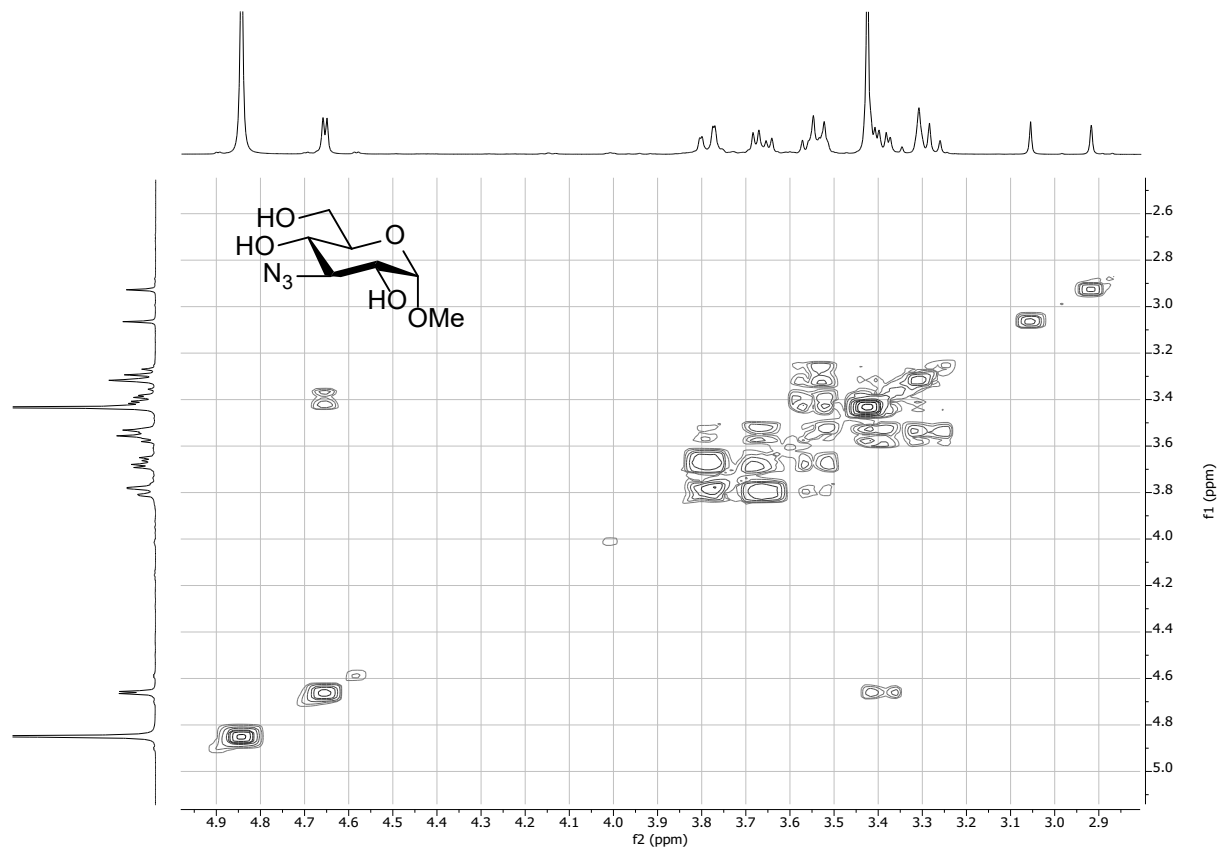

$^1\text{H}$ - $^{13}\text{C}$  HSQC of compound **4**

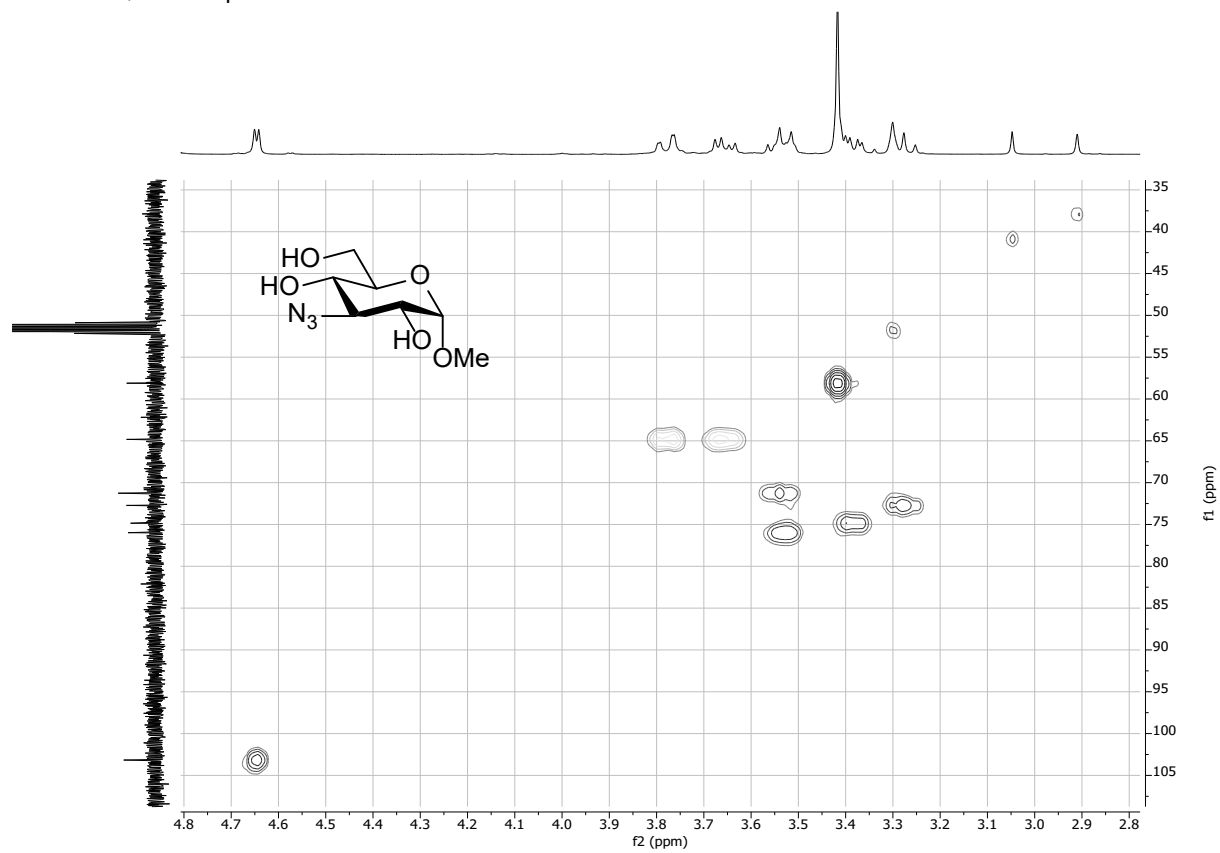

### Methyl 2-azido-2-deoxy- $\alpha$ -D-altropyranoside (S1)

$^1\text{H}$  NMR, 400 MHz,  $\text{CD}_3\text{OD}$  of compound S1

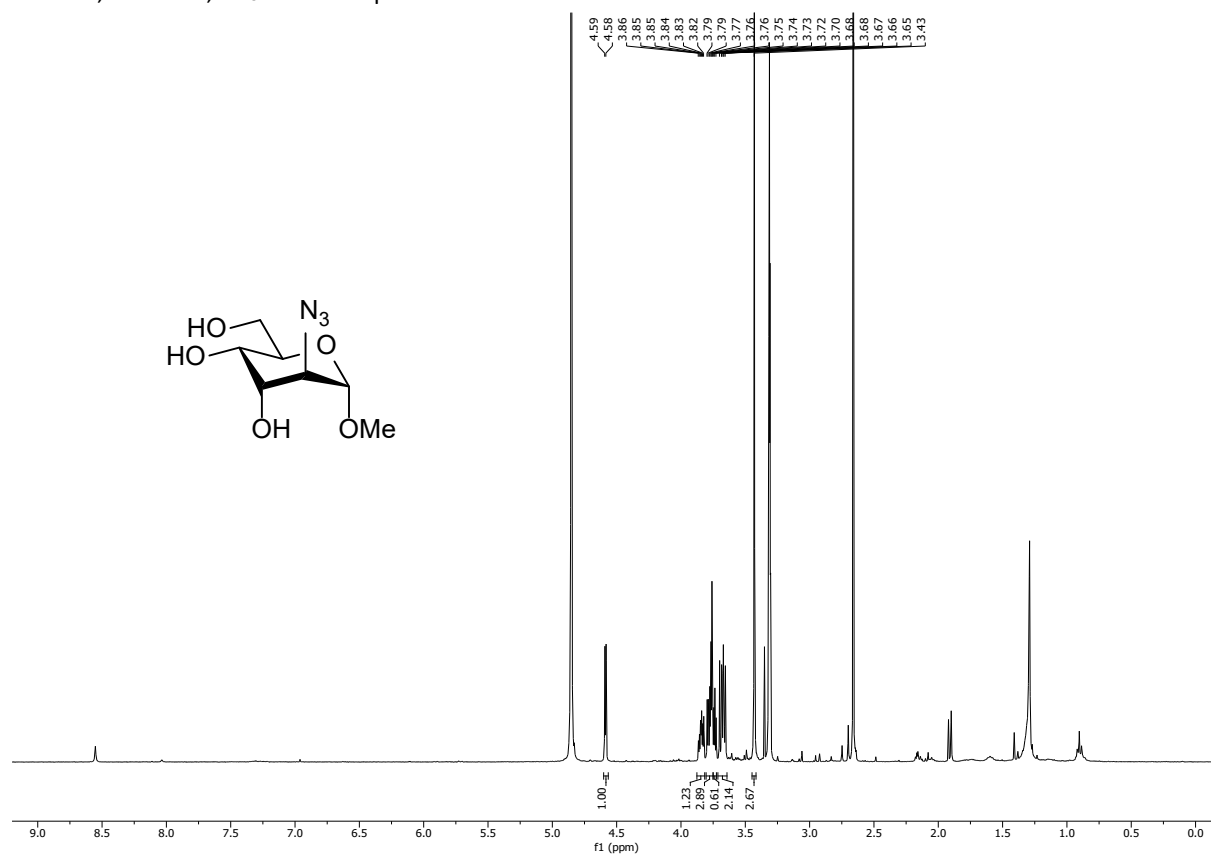

$^{13}\text{C}$  NMR, 101 MHz,  $\text{CD}_3\text{OD}$  of compound S1

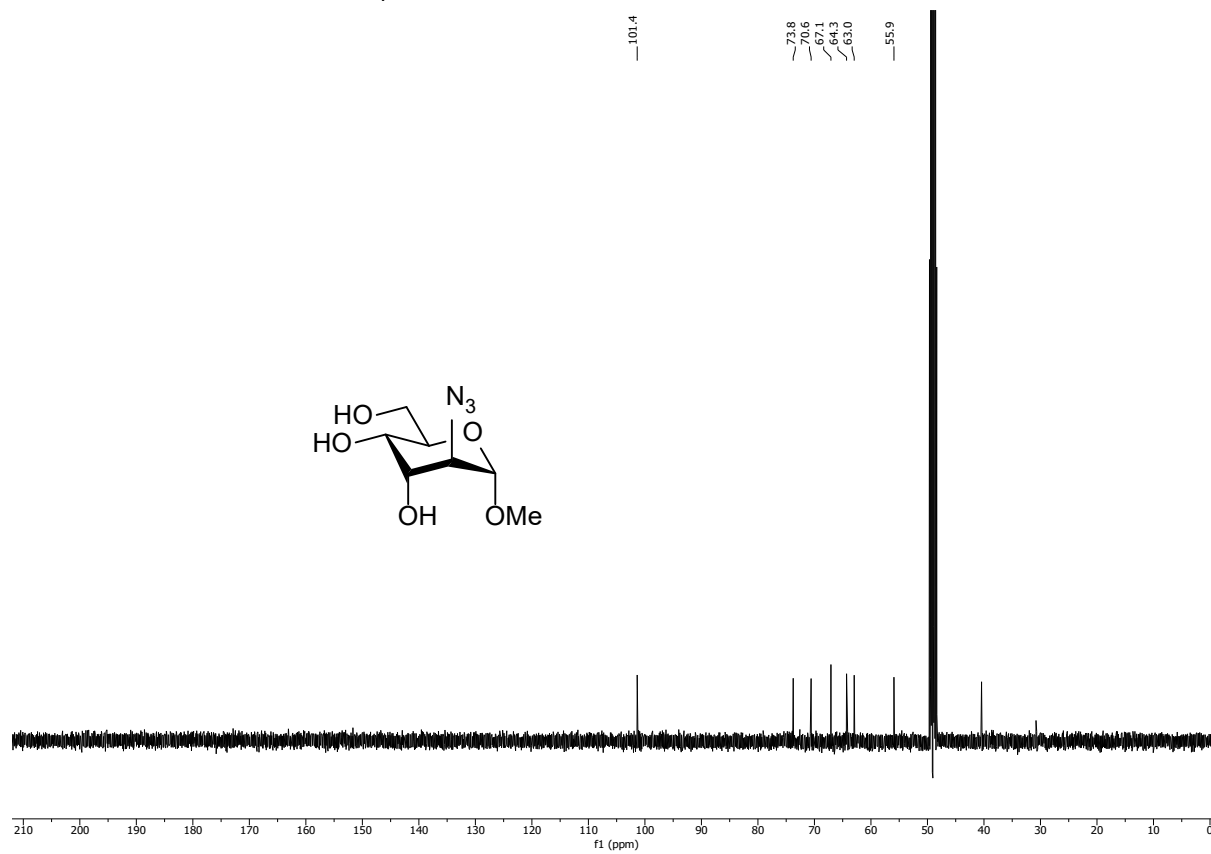

$^1\text{H}$ - $^1\text{H}$  COSY of compound **S1**

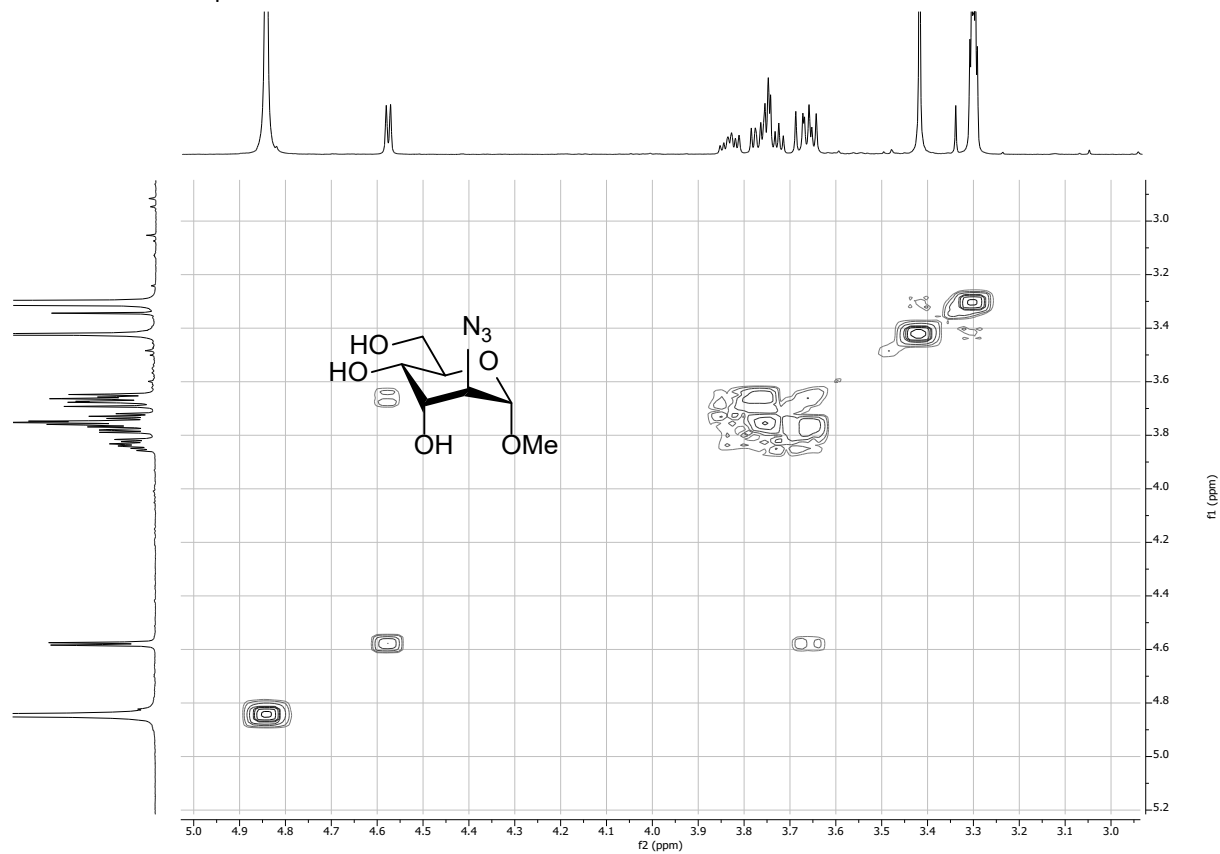

$^1\text{H}$ - $^{13}\text{C}$  HSQC of compound **S1**

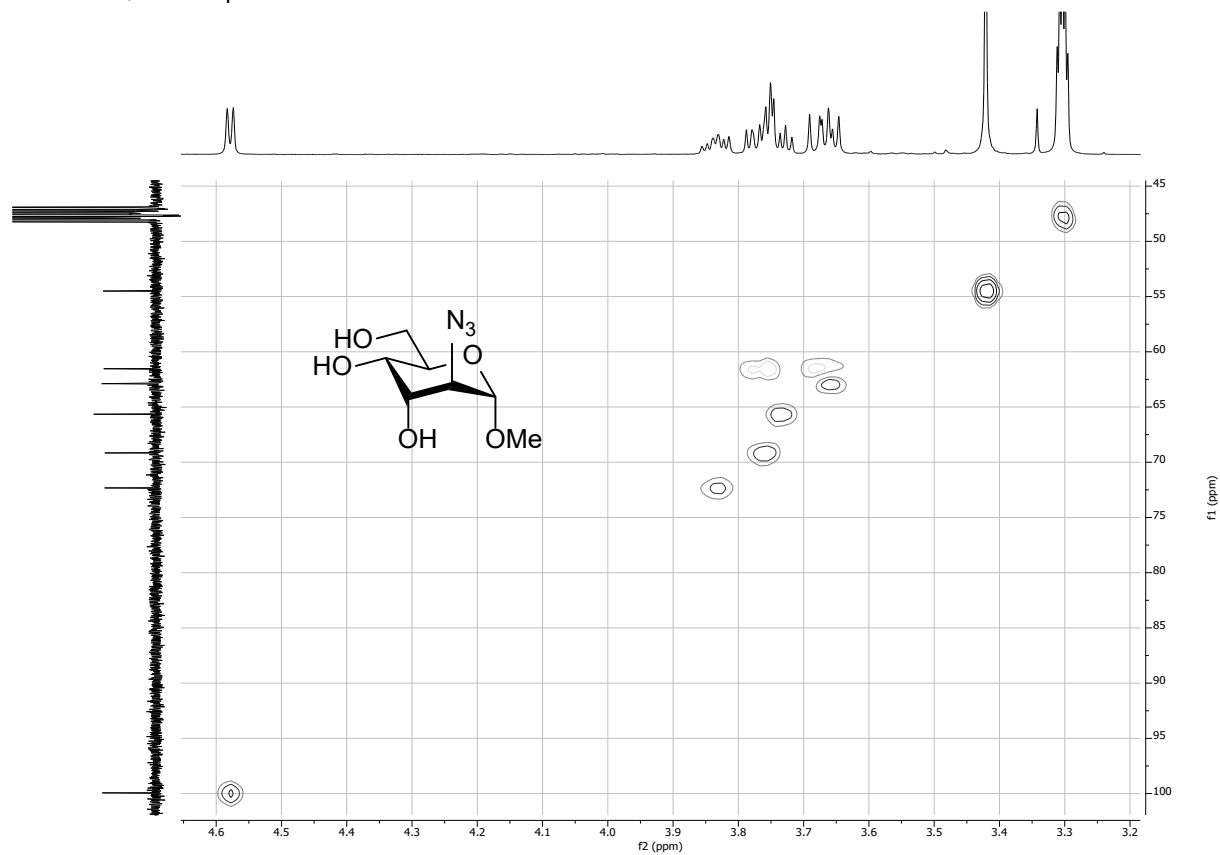

**Isopropyl 2-acetamido-3-azido-2,3-dideoxy- $\alpha$ -D-glucopyranoside (S3)**

$^1\text{H}$  NMR, 400 MHz,  $\text{CD}_3\text{OD}$  of compound **S3**

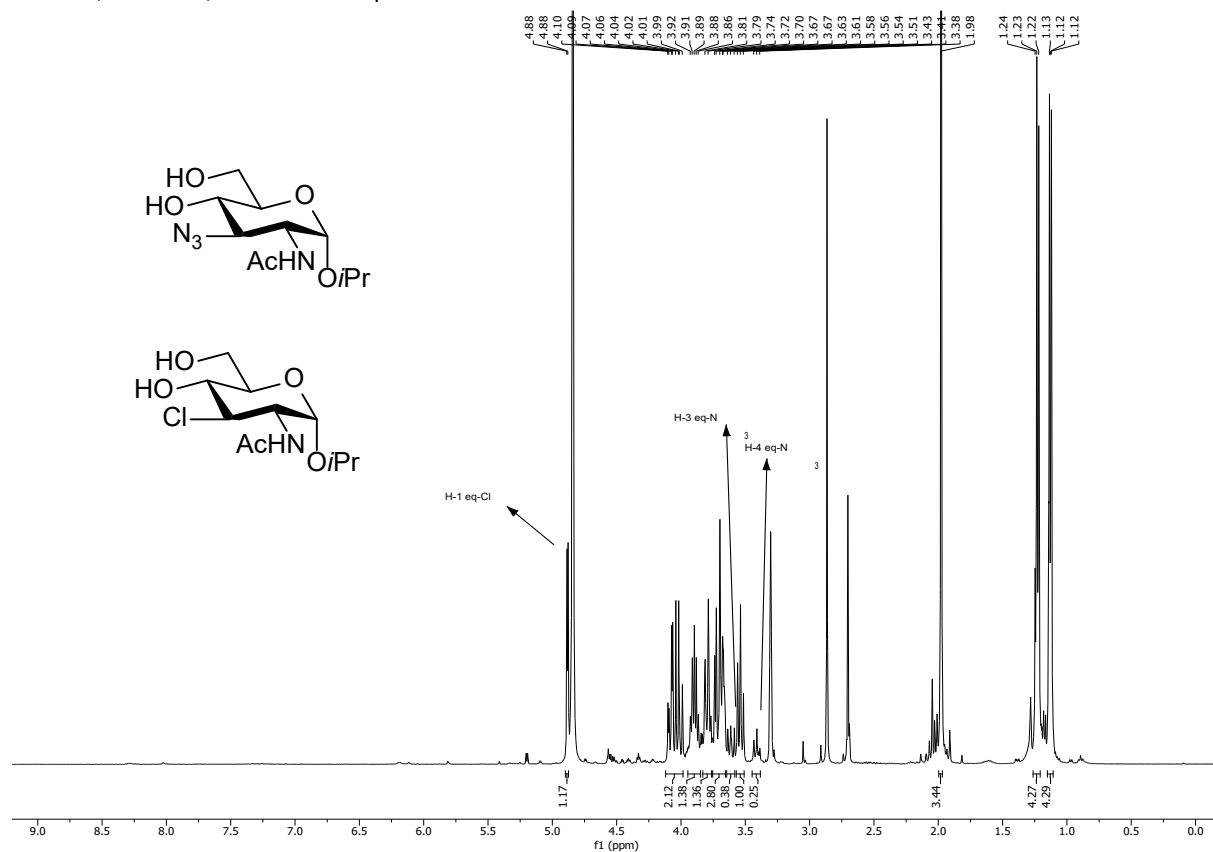

$^{13}\text{C}$  NMR, 101 MHz,  $\text{CD}_3\text{OD}$  of compound **S3 (the minor peaks)**

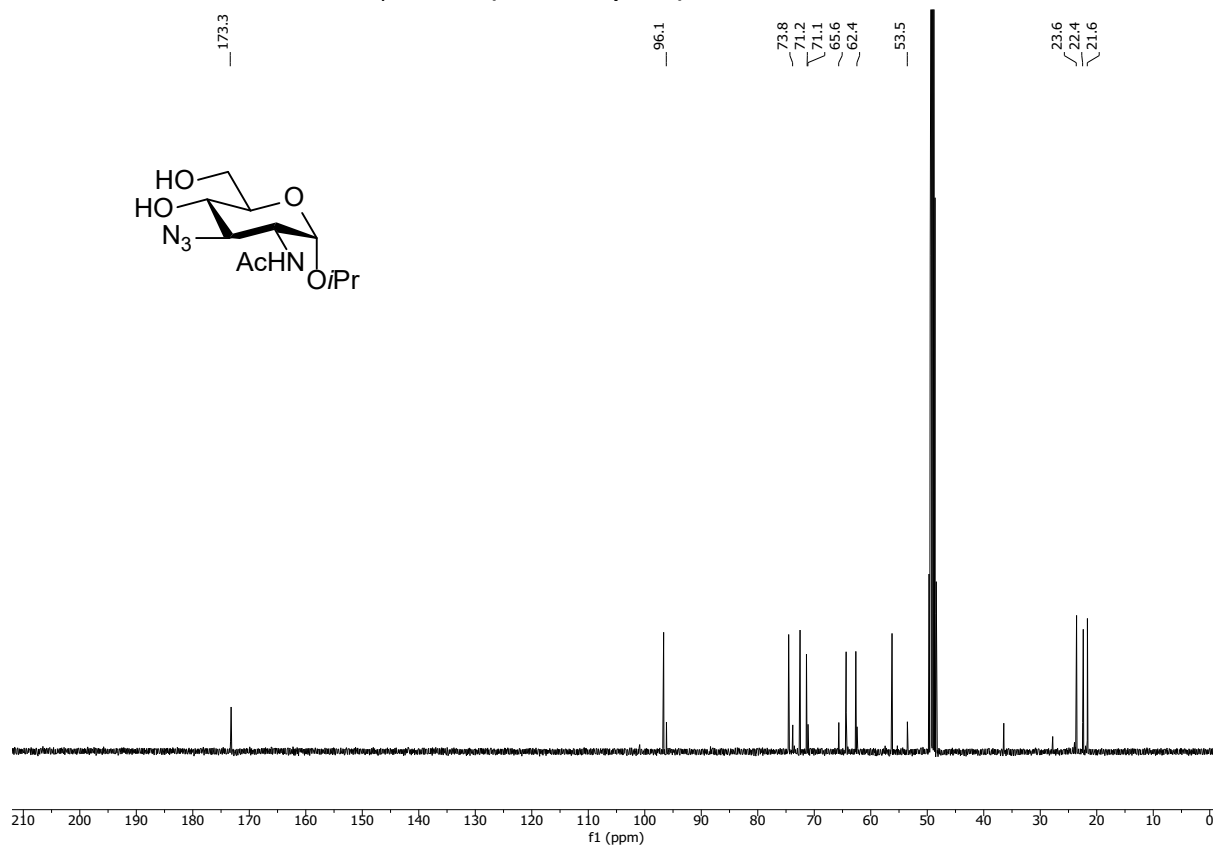

$^1\text{H}$ - $^1\text{H}$  COSY of compound **S3**

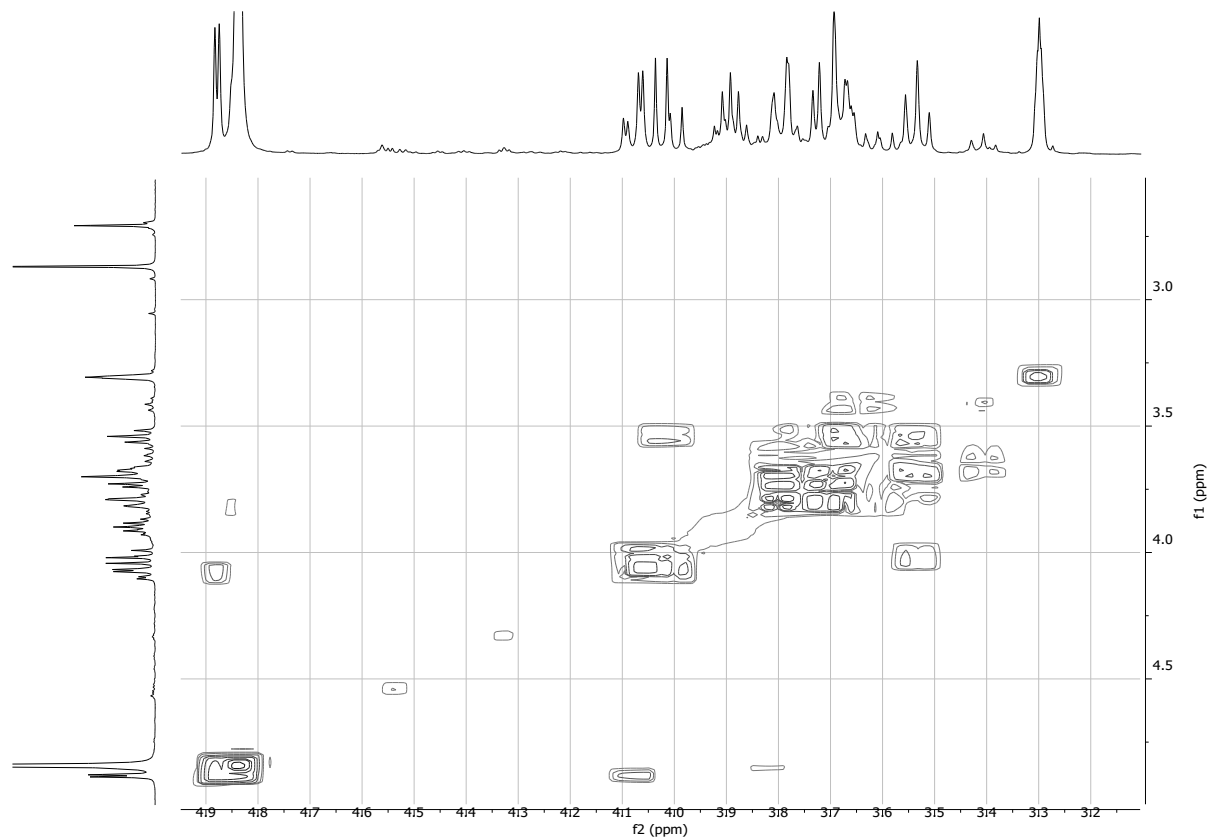

$^1\text{H}$ - $^{13}\text{C}$  HSQC of compound **S3**

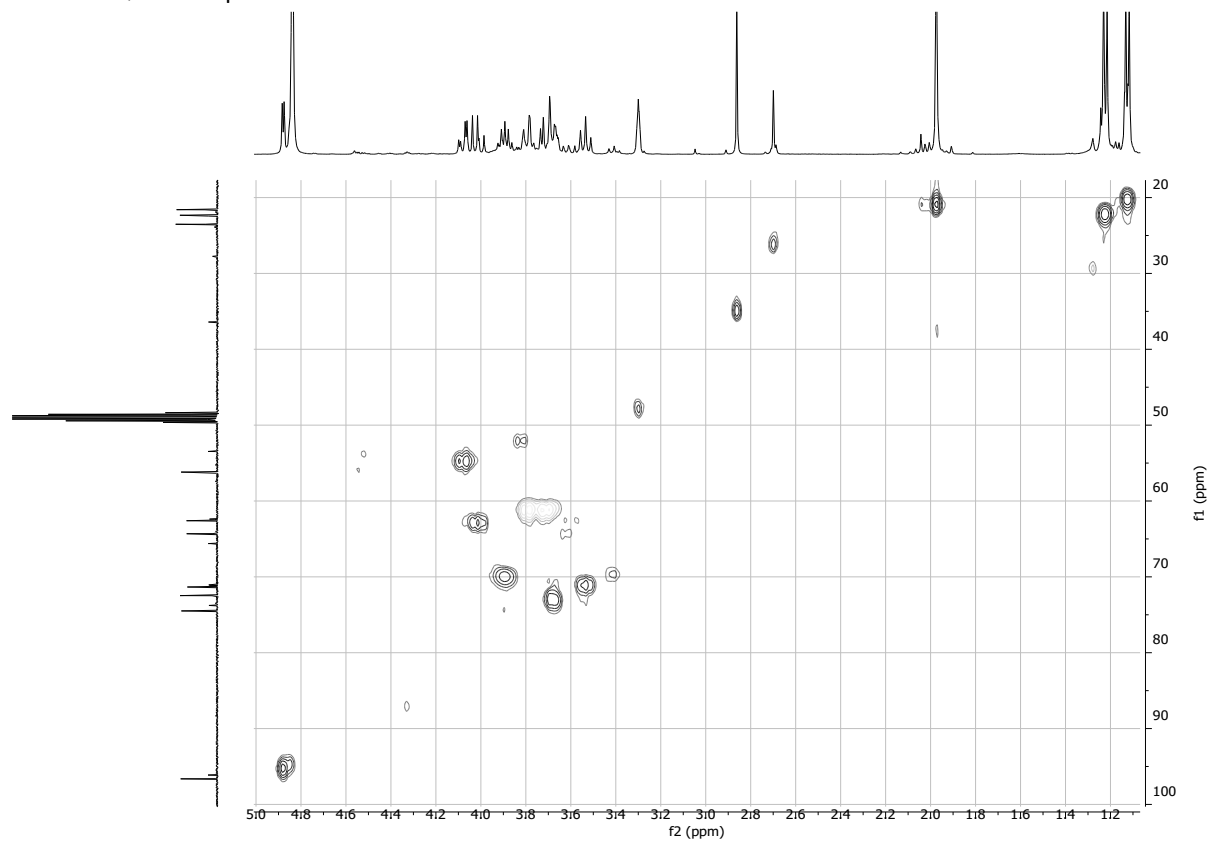

### Sideproduct of the azide introduction in GlcNAc (S4)

$^1\text{H}$  NMR, 400 MHz,  $\text{CD}_3\text{OD}$  of compound **S4**

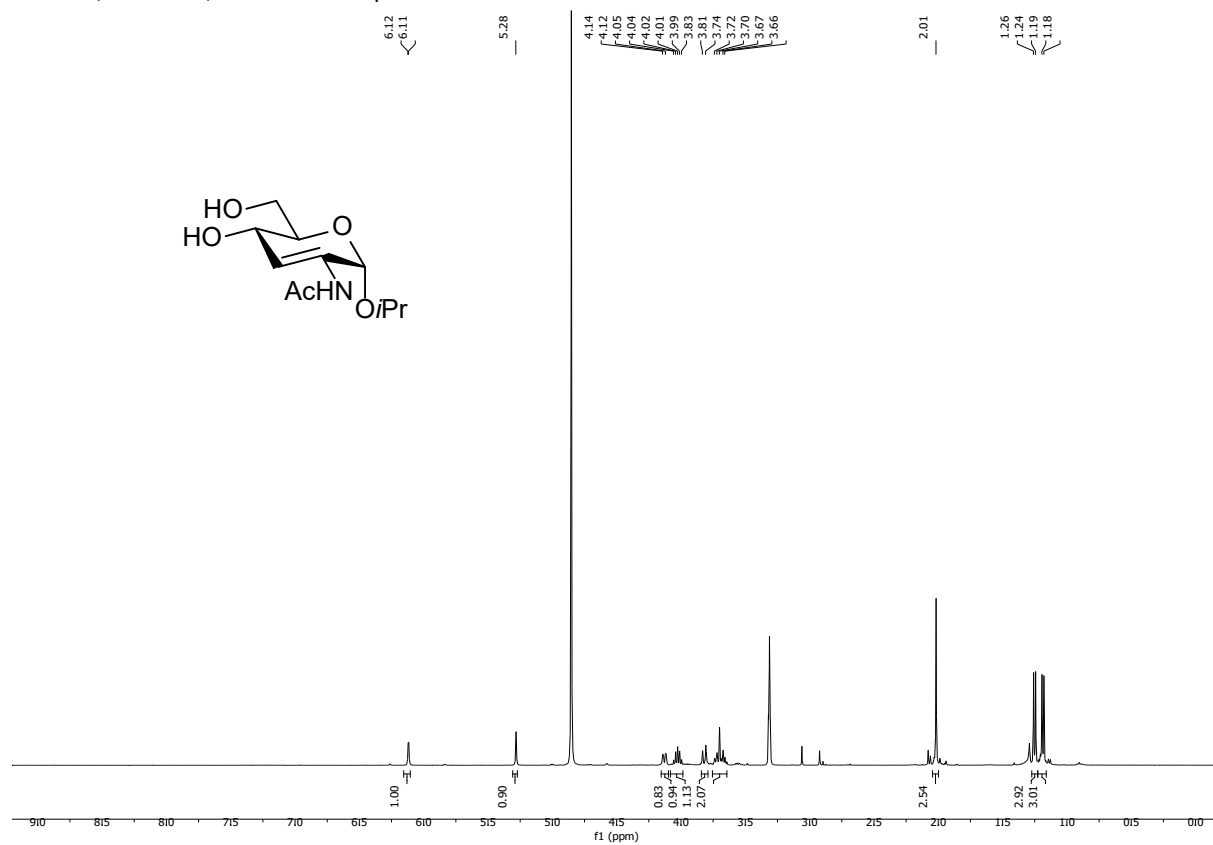

$^{13}\text{C}$  NMR, 101 MHz,  $\text{CD}_3\text{OD}$  of compound **S4**

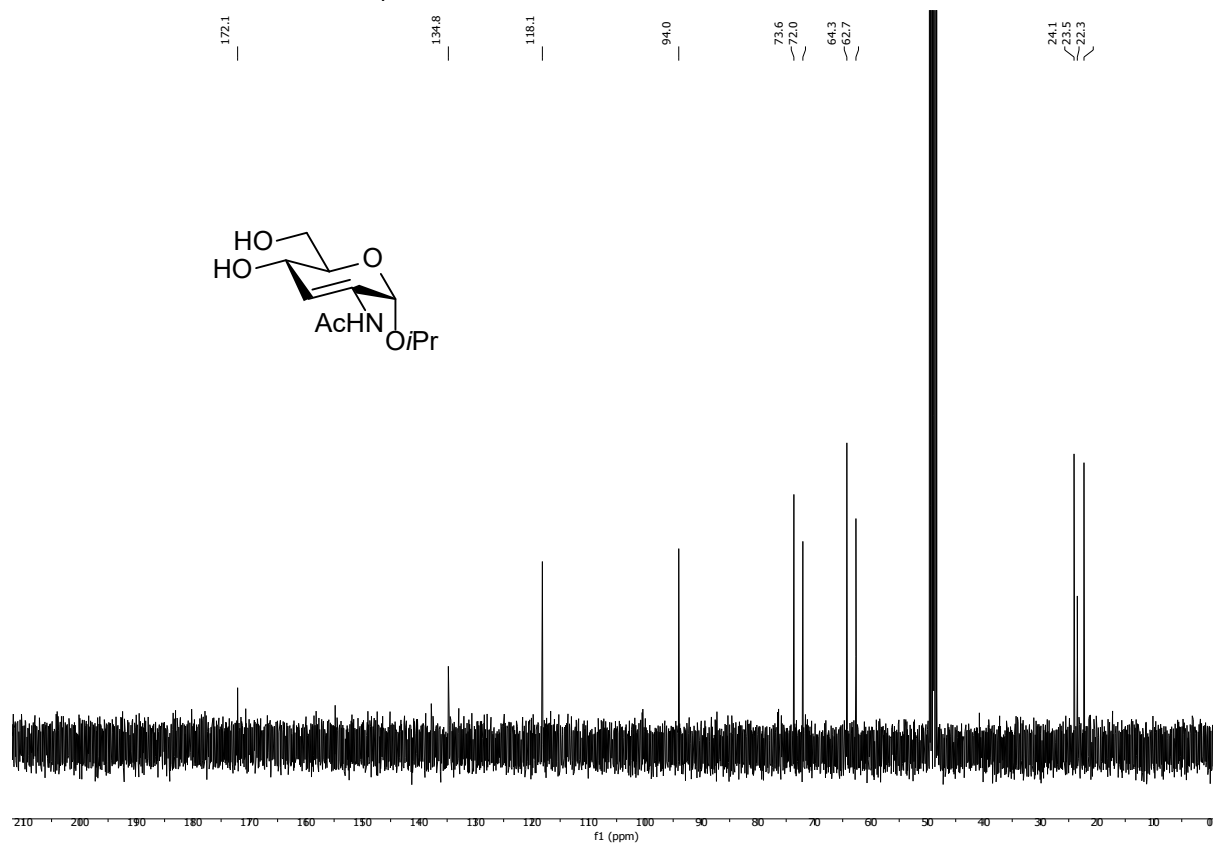



$^1\text{H}$ - $^1\text{H}$  COSY of compound **S4**

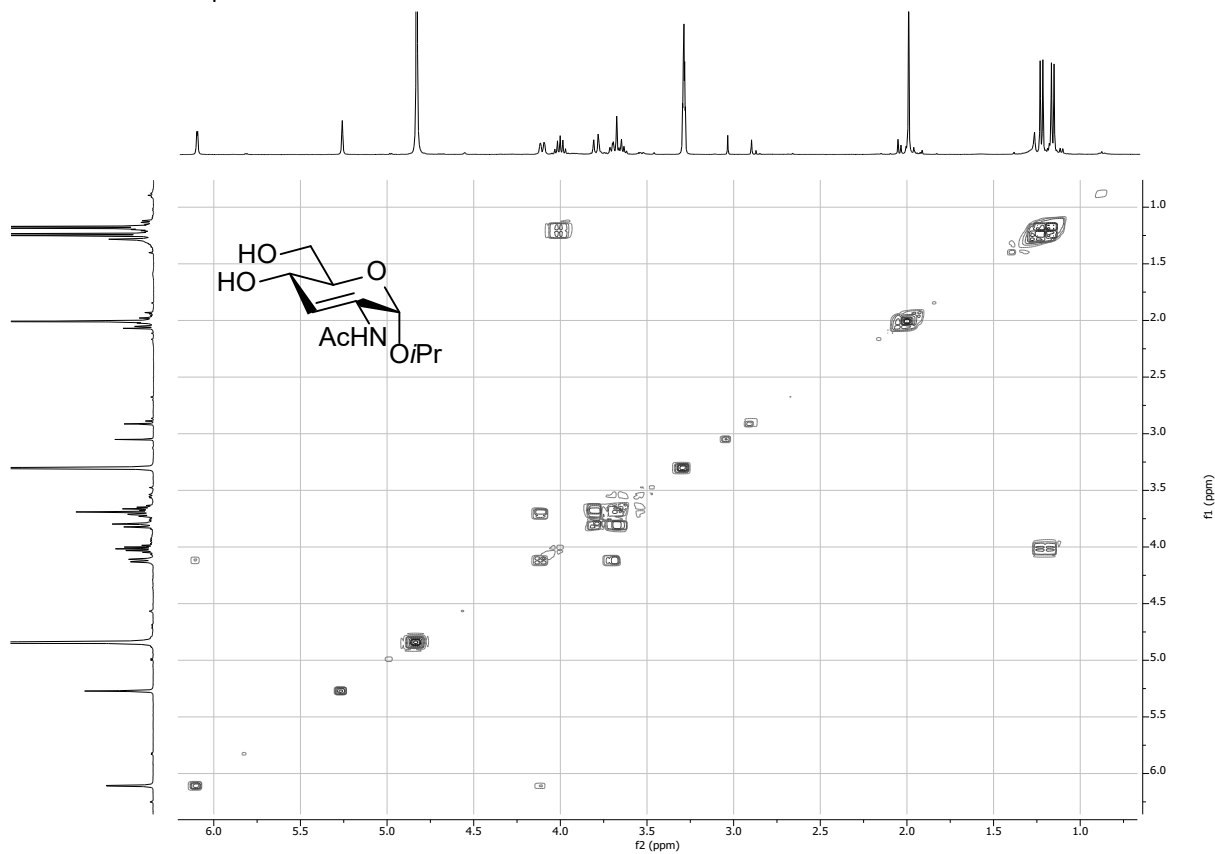

$^1\text{H}$ - $^{13}\text{C}$  HSQC of compound **S4**

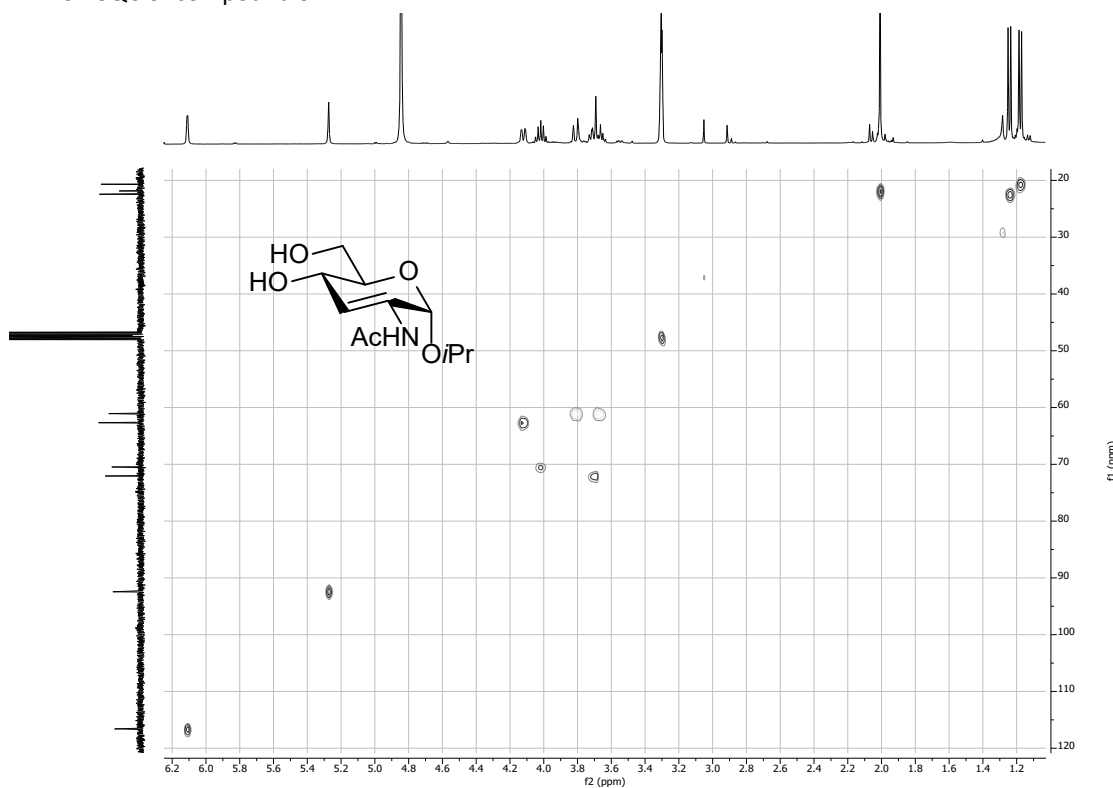

**4-tert-butylbenzyl-3-azido-3-deoxy- $\alpha$ -D-maltoside (S6)**

$^1\text{H}$  NMR, 400 MHz,  $\text{CD}_3\text{OD}$  of compound S6

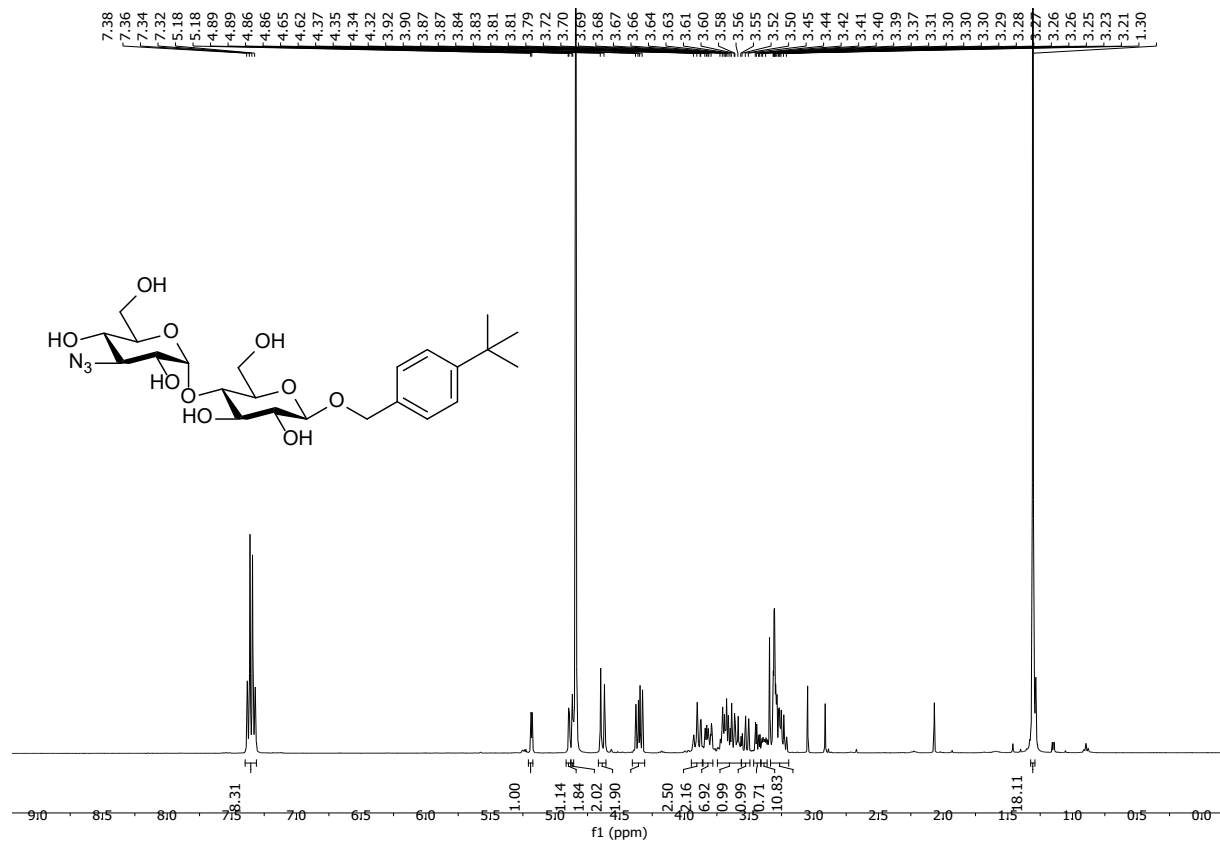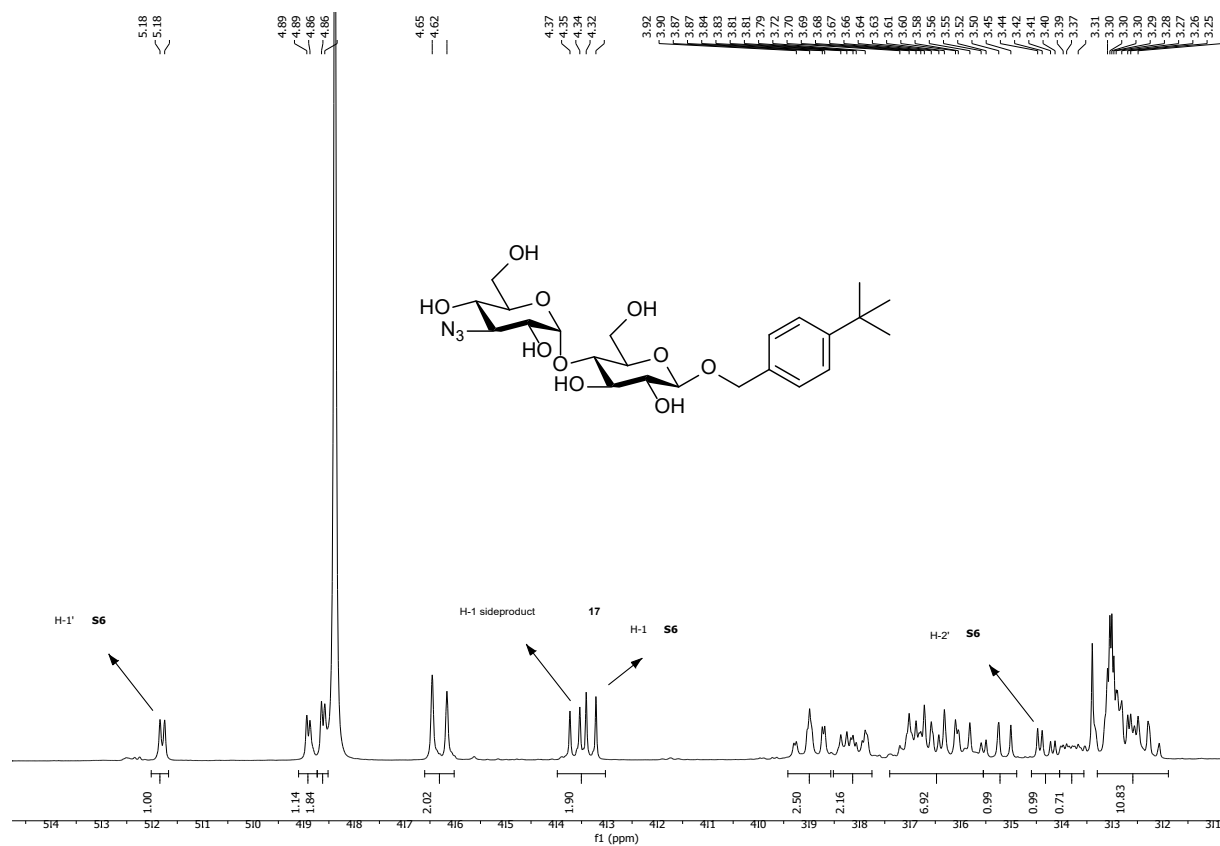

<sup>13</sup>C NMR, 101 MHz, CD<sub>3</sub>OD of compound **S6**

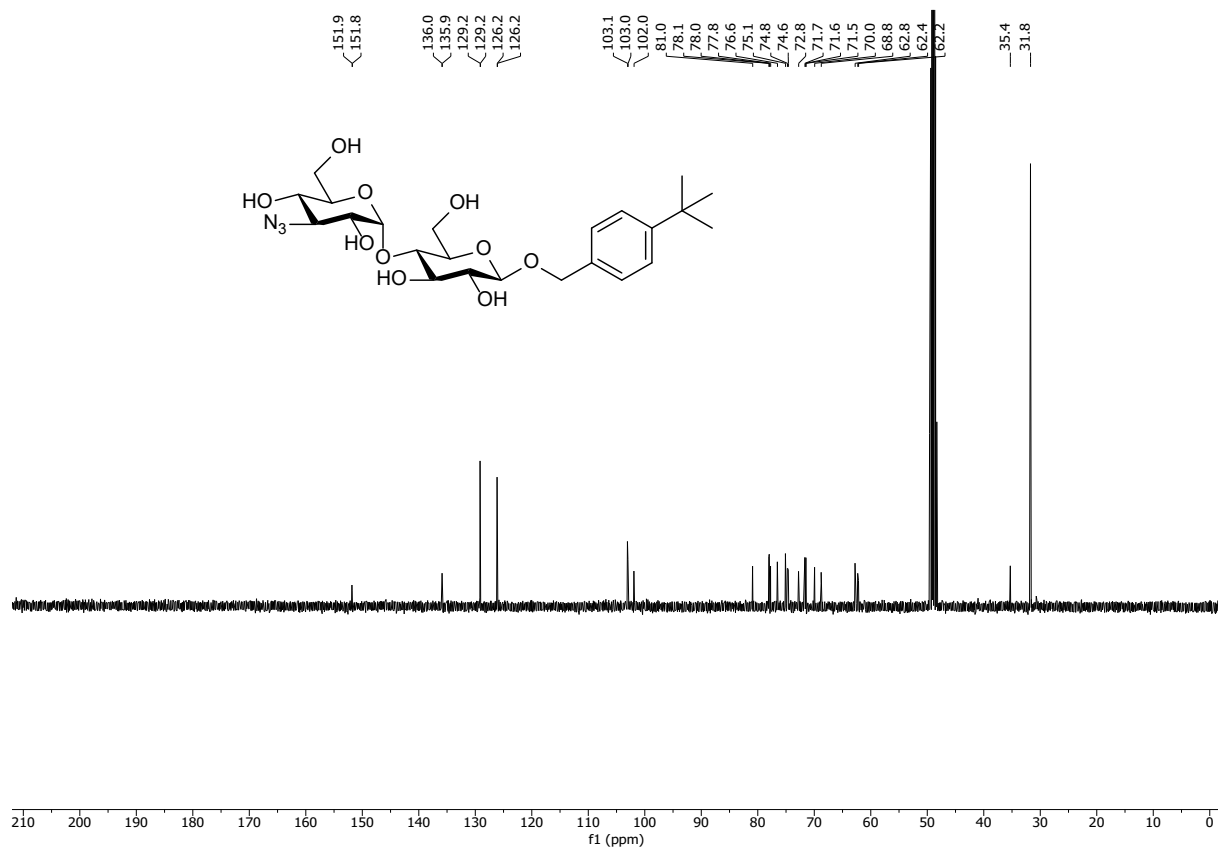

<sup>1</sup>H-<sup>1</sup>H COSY of compound **S6**

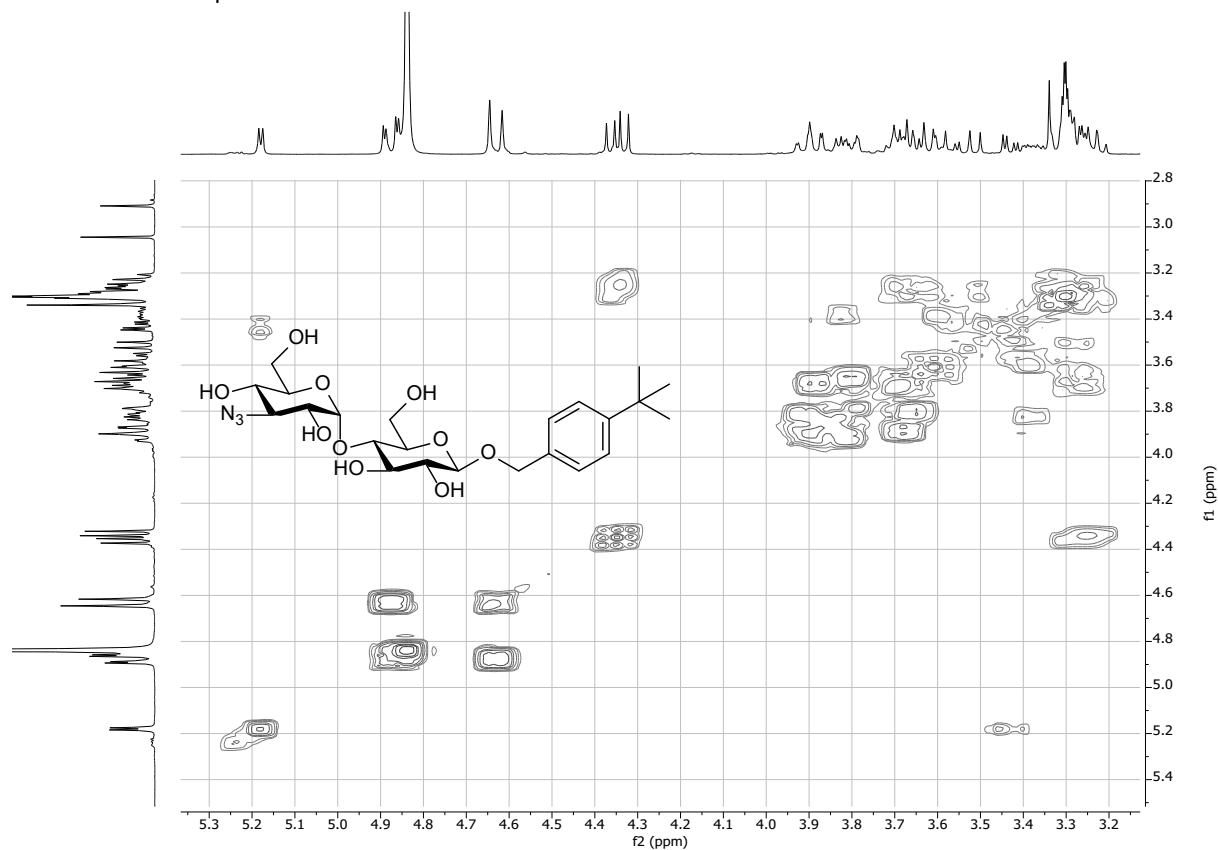

$^1\text{H}$ - $^{13}\text{C}$  HSQC of compound **S6**

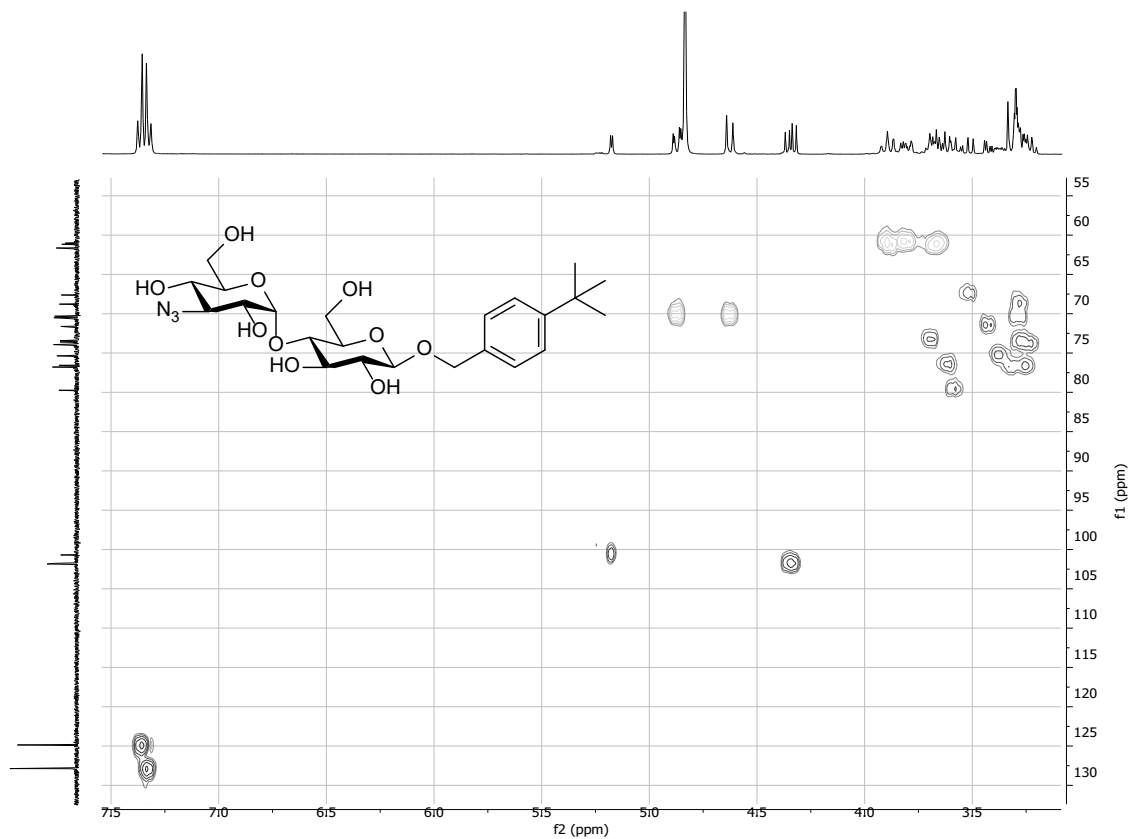

**4-tert-butylbenzyl- $\beta$ -D-glucopyranoside (17)**

$^1\text{H}$  NMR, 400 MHz,  $\text{CD}_3\text{OD}$  of compound **17**

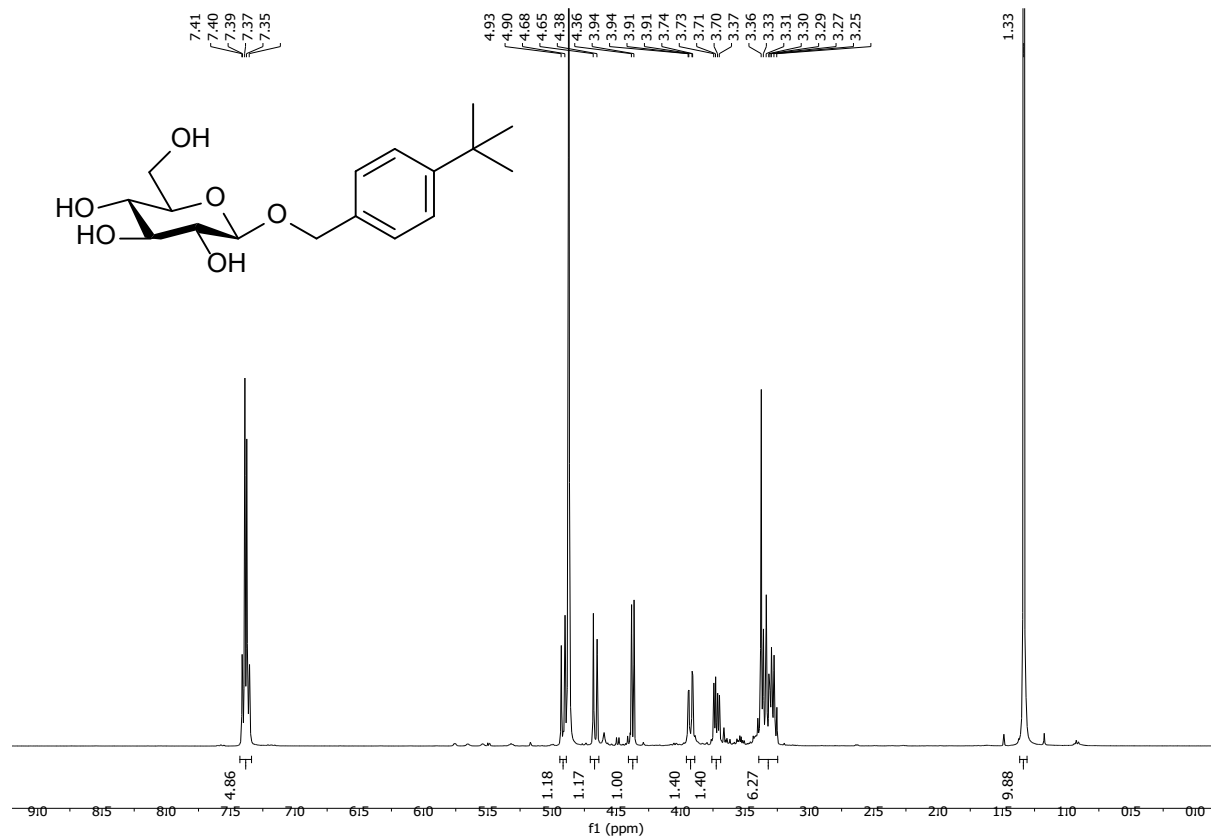

<sup>13</sup>C NMR, 101 MHz, CD<sub>3</sub>OD of compound **17**

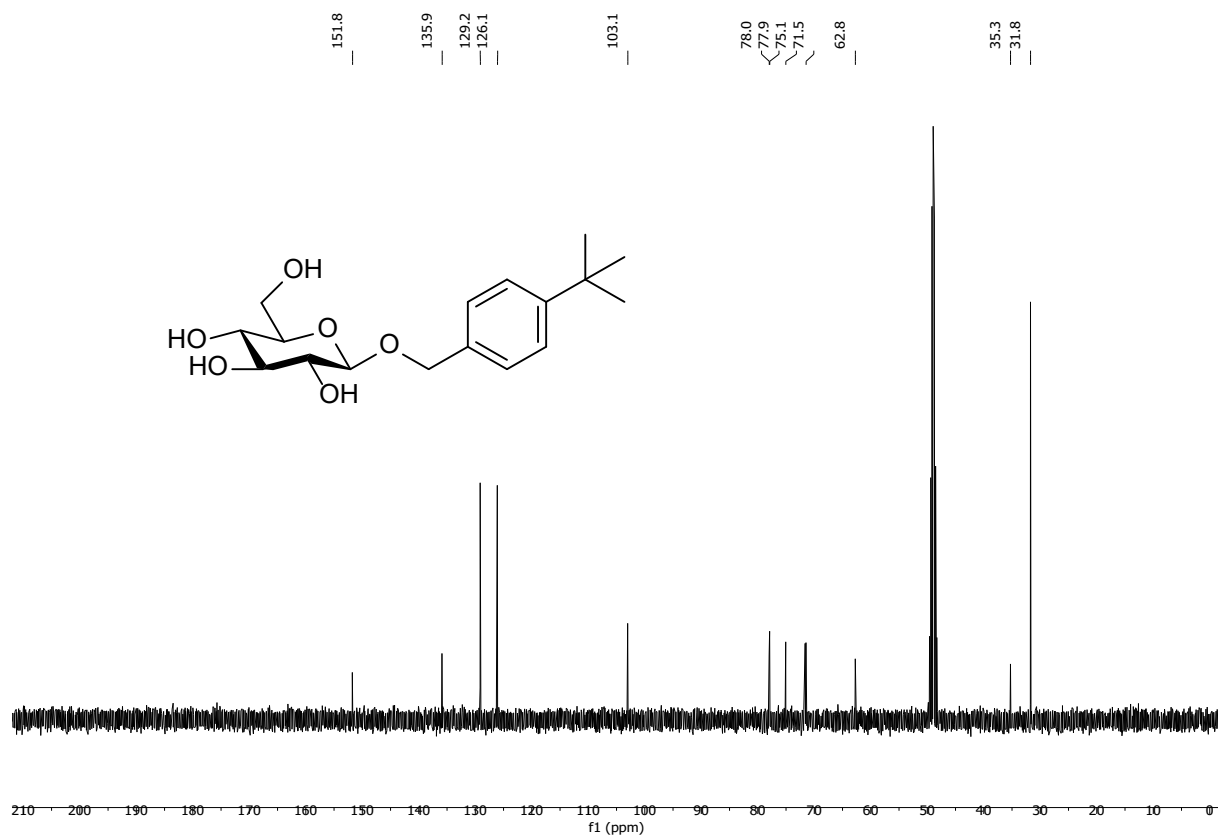

<sup>1</sup>H-<sup>1</sup>H COSY of compound **17**

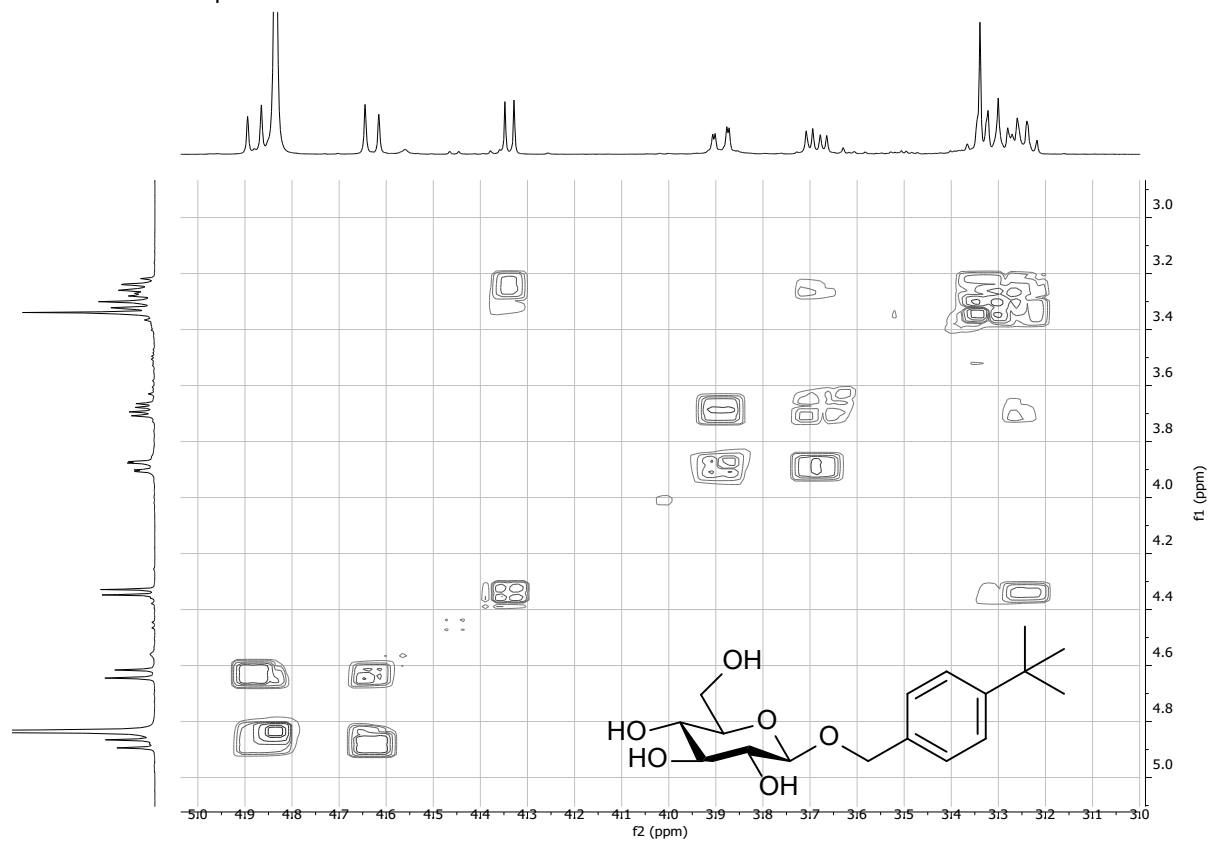

$^1\text{H}$ - $^{13}\text{C}$  HSQC of compound 17

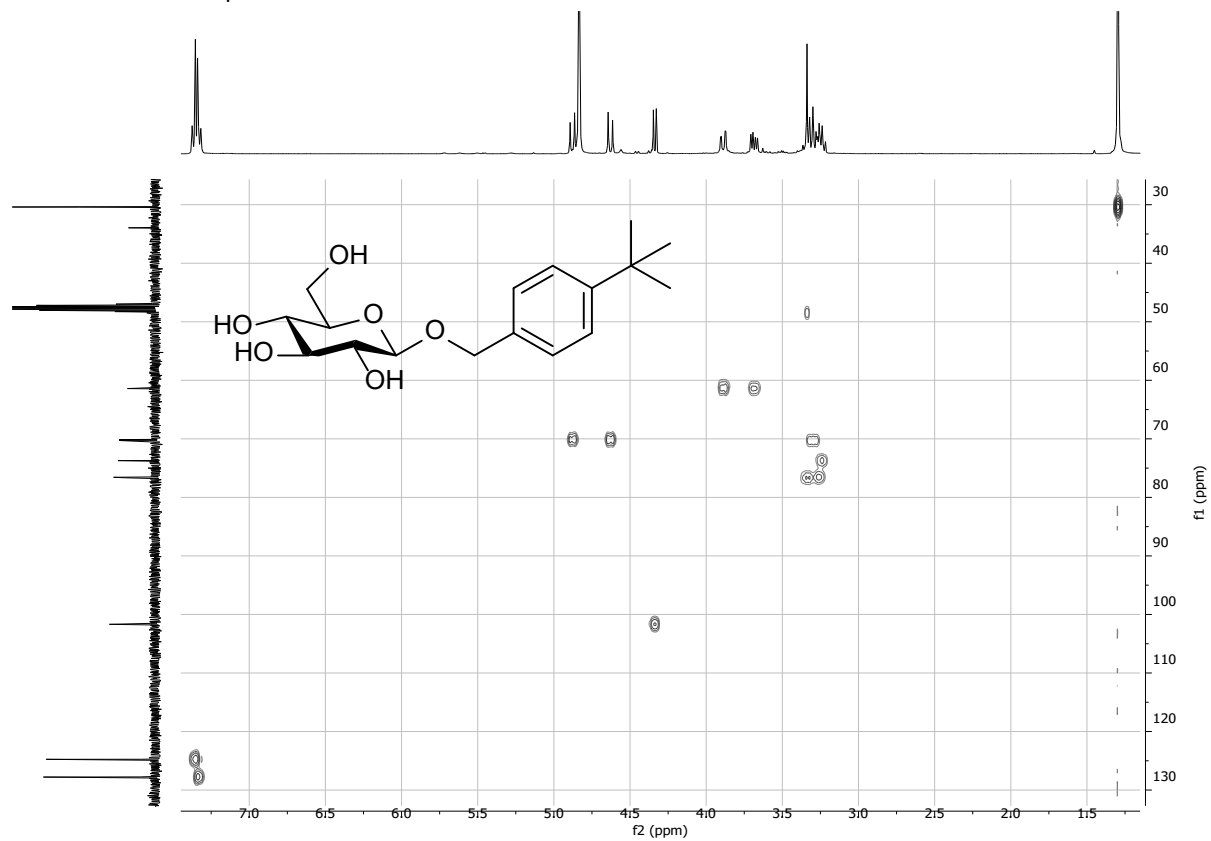

NMR spectra of epoxides 5 and 6

Methyl 2,3-anhydro- $\alpha$ -D-glucopyranoside (5)

$^1\text{H}$  NMR, 400 MHz,  $\text{CD}_3\text{OD}$  of compound 5

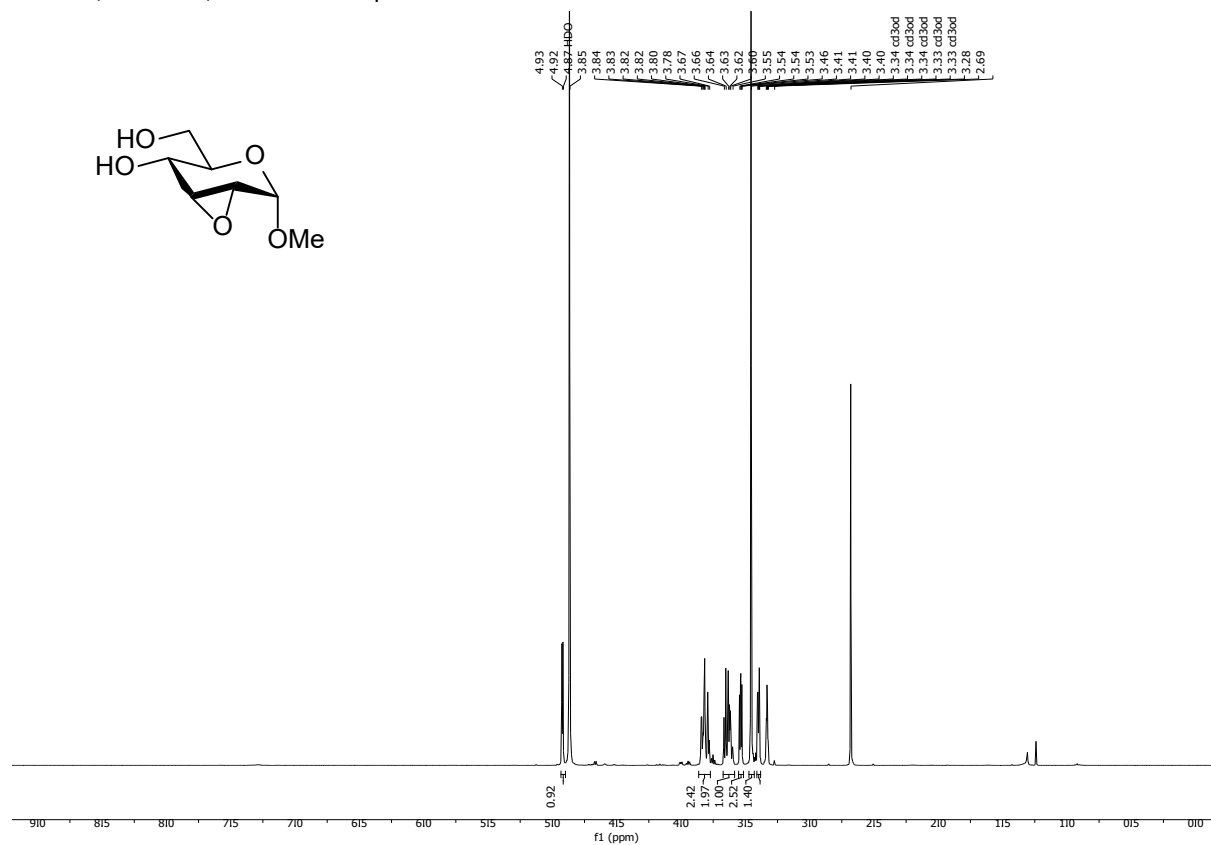

$^{13}\text{C}$  NMR, 101 MHz,  $\text{CD}_3\text{OD}$  of compound 5

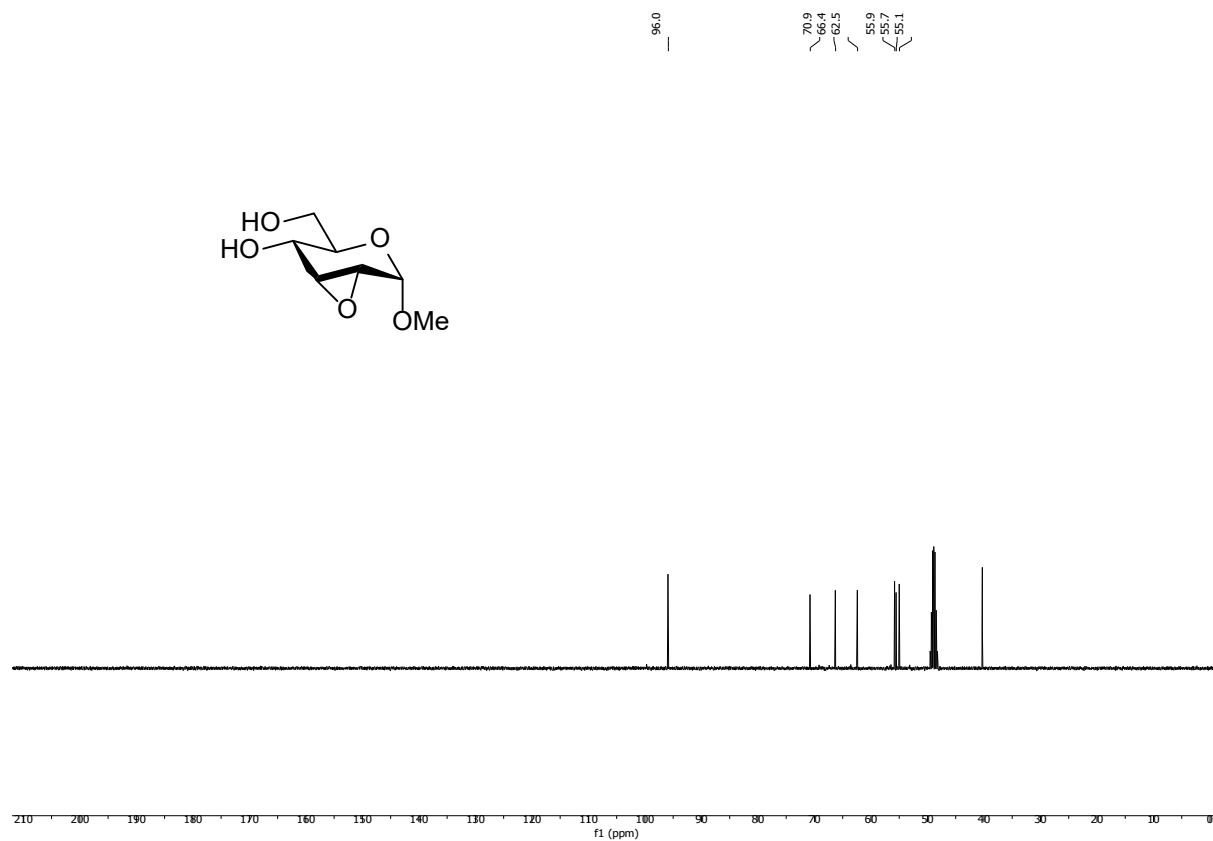

$^1\text{H}$ - $^1\text{H}$  COSY of compound 5 in  $\text{CD}_3\text{OD}$

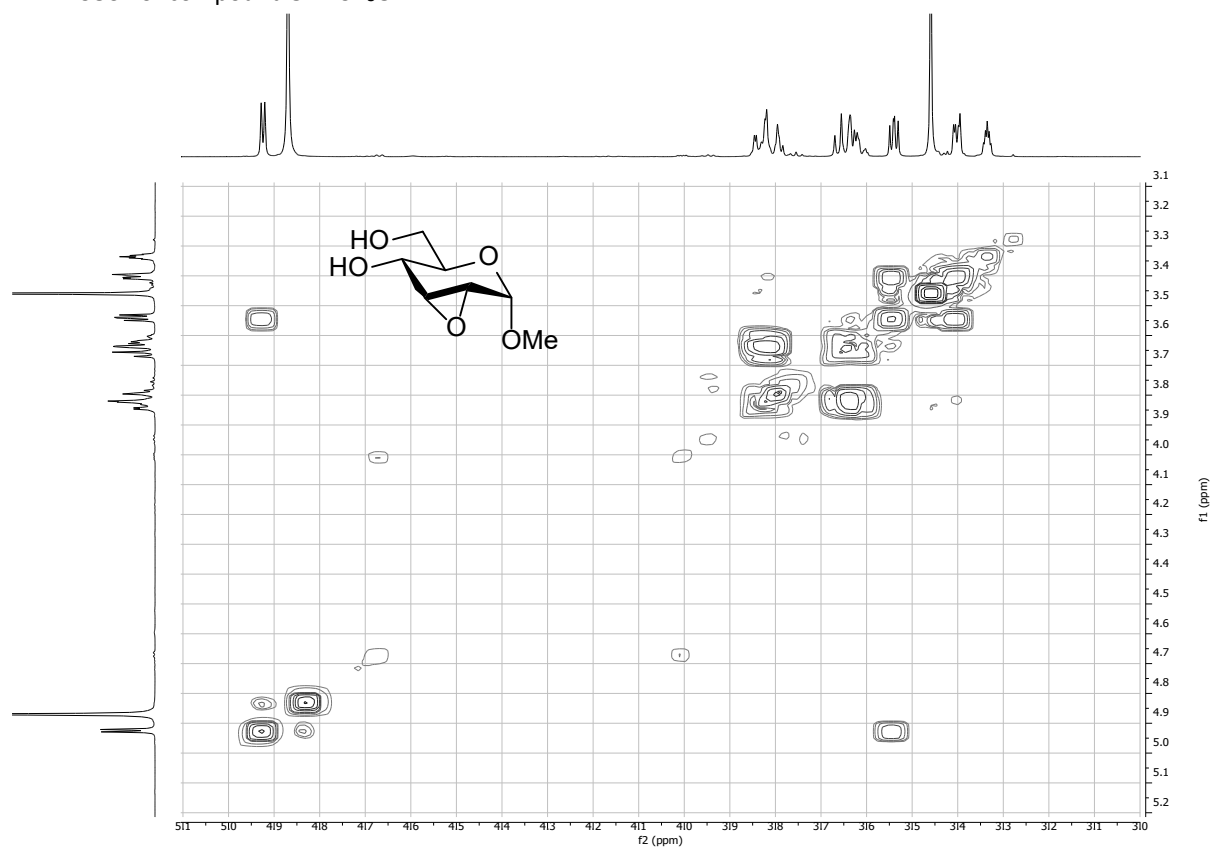

$^1\text{H}$ - $^{13}\text{C}$  HSQC of compound 5 in  $\text{CD}_3\text{OD}$

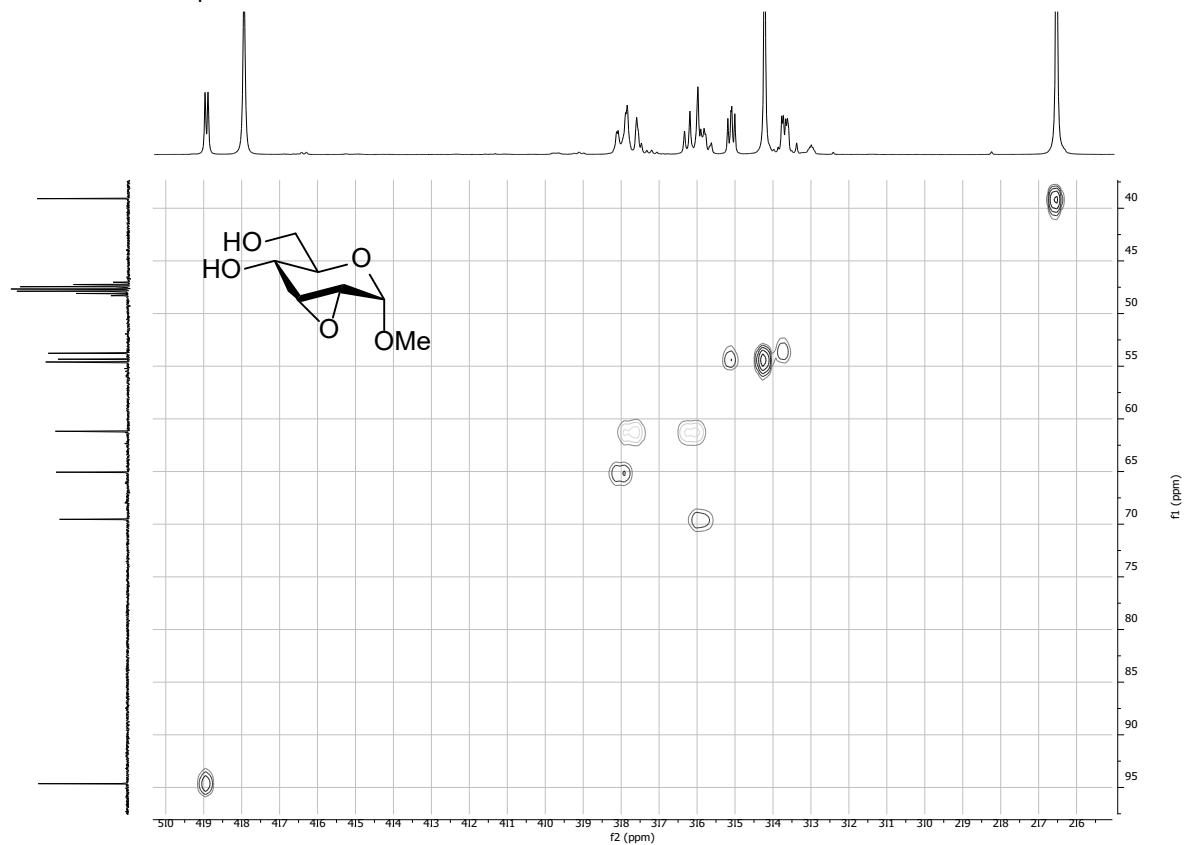

$^1\text{H}$  NMR, 400 MHz,  $\text{D}_2\text{O}$  of compound 5

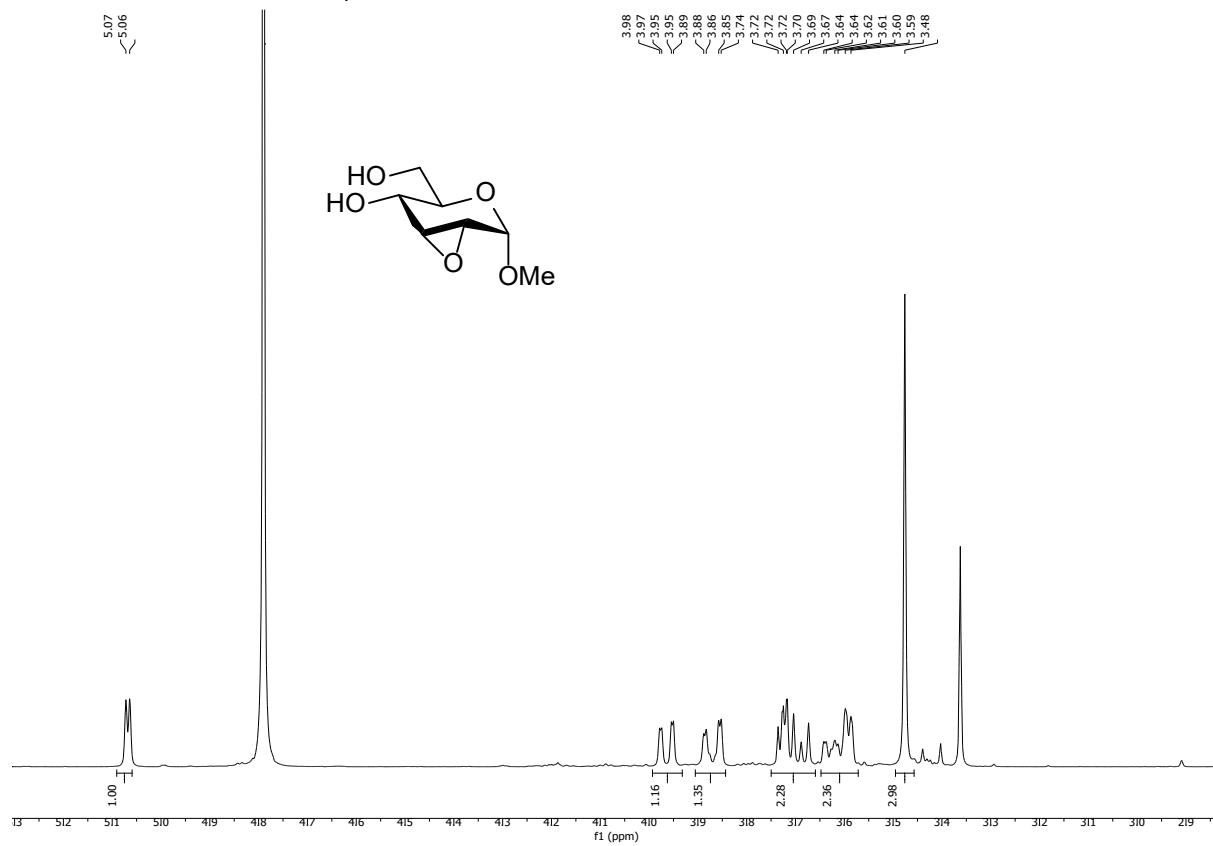



### 4-tert-butylbenzyl-2,3-anhydro- $\alpha$ -D-maltoside (6)

$^1\text{H}$  NMR, 400 MHz,  $\text{CD}_3\text{OD}$  of compound 6

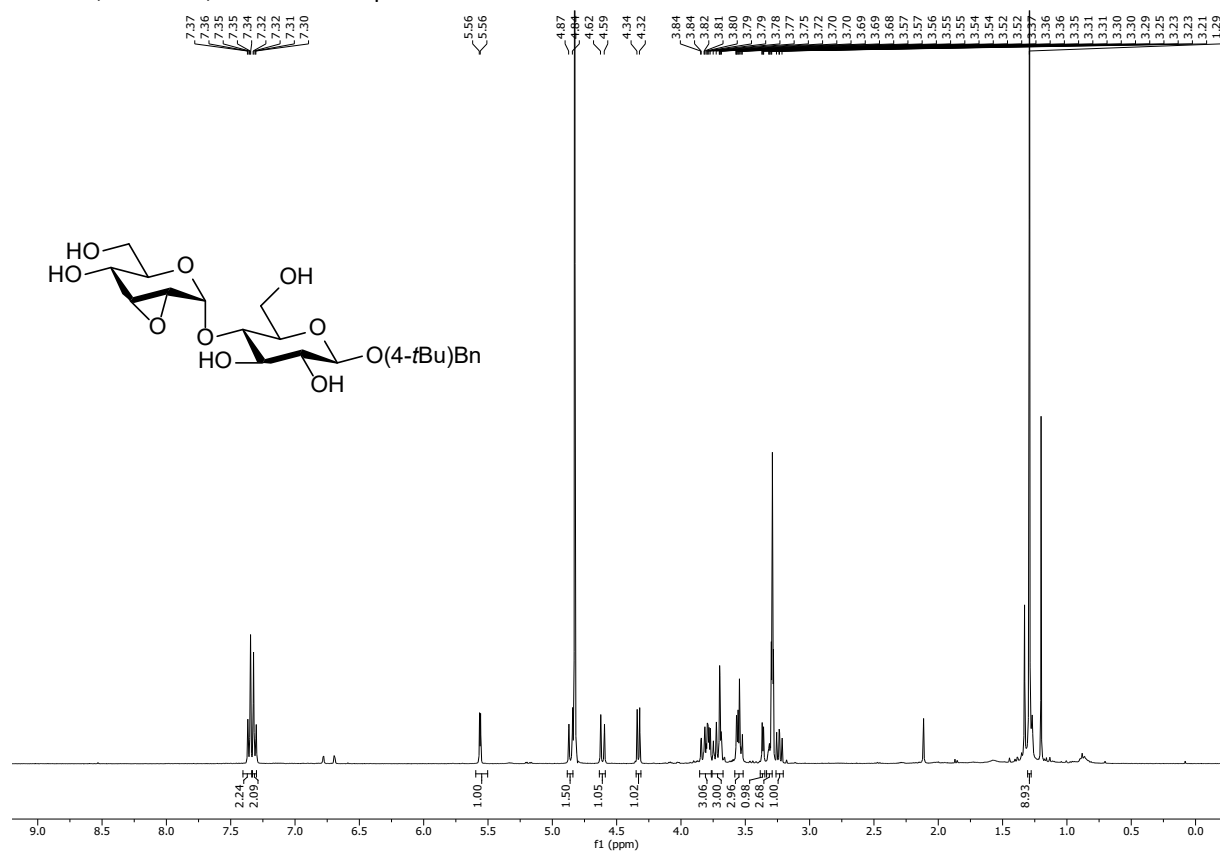

$^{13}\text{C}$  NMR, 101 MHz,  $\text{CD}_3\text{OD}$  of compound 6

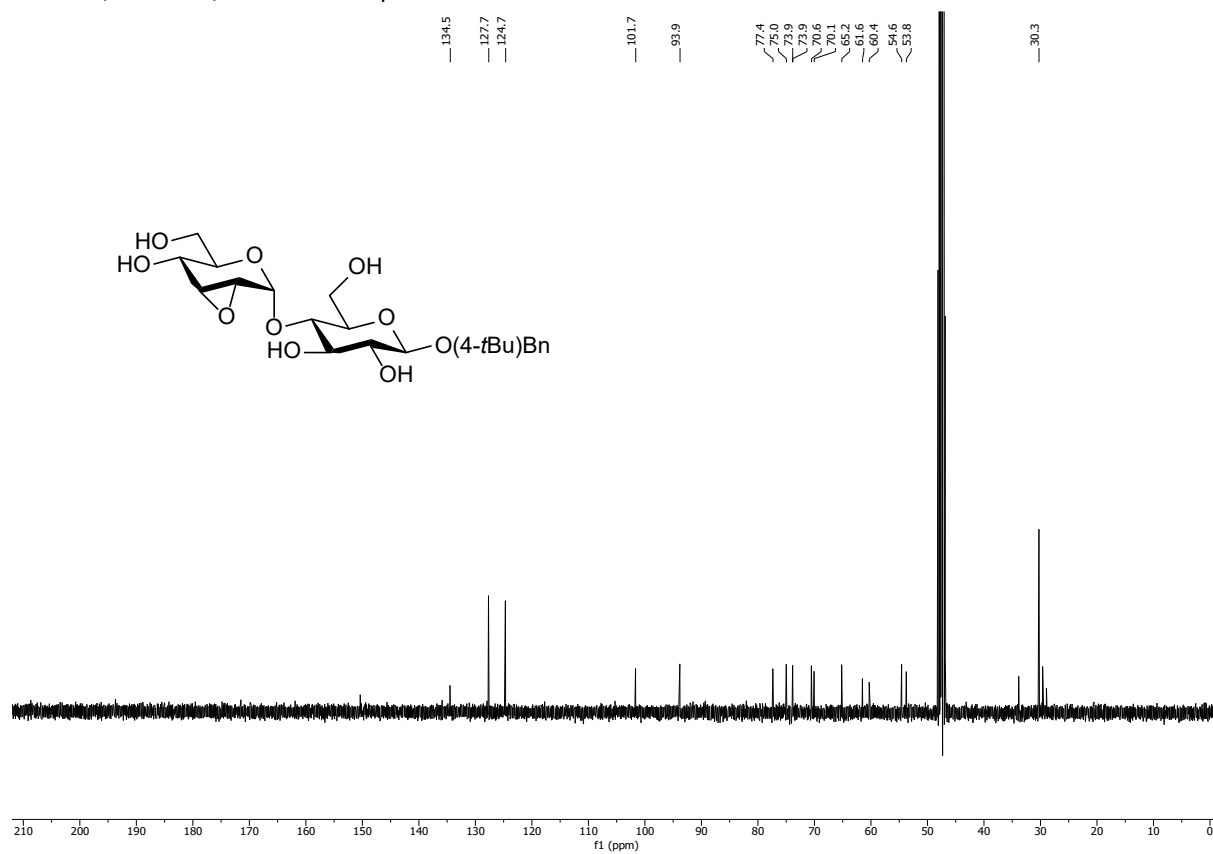

$^1\text{H}$ - $^1\text{H}$  COSY of compound **6** in  $\text{CD}_3\text{OD}$

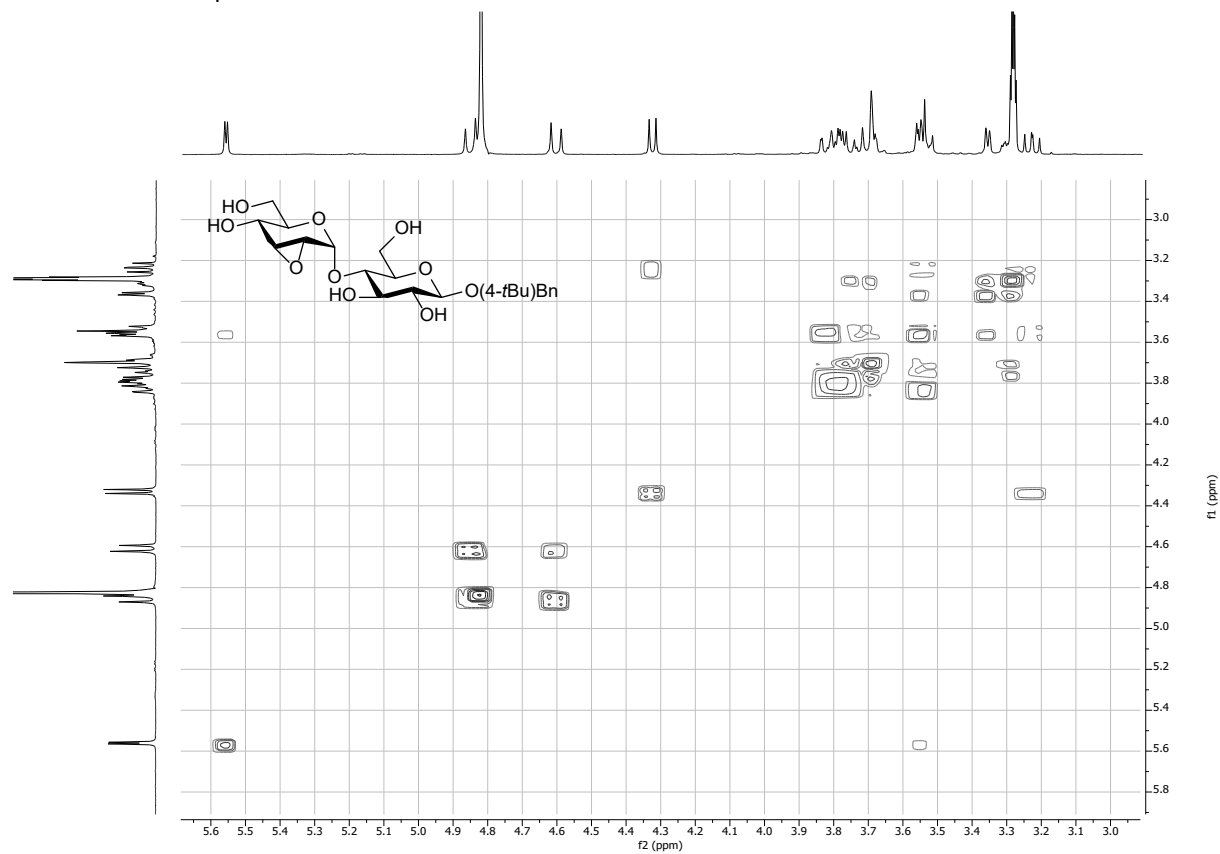

$^1\text{H}$ - $^{13}\text{C}$  HSQC of compound **6** in  $\text{CD}_3\text{OD}$

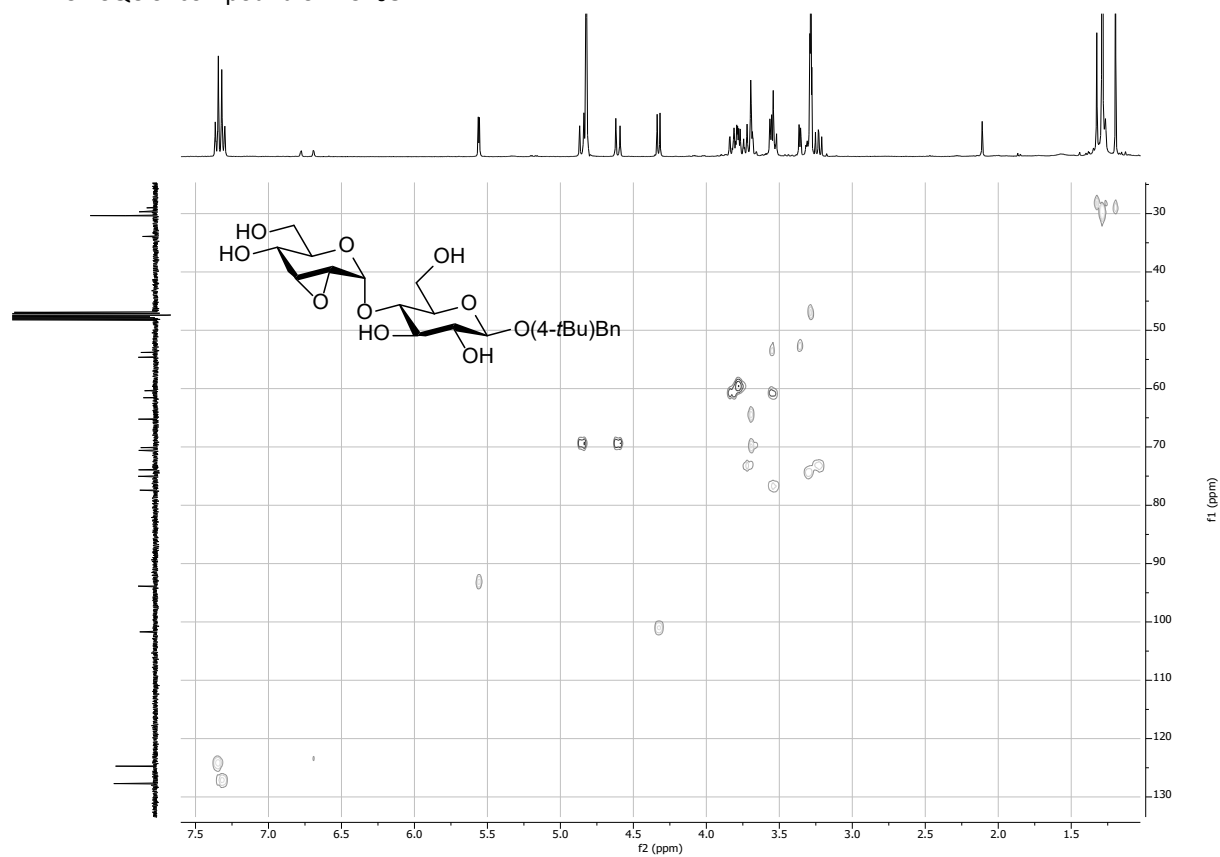

# NMR spectra of $\alpha$ -Glc derivatives

## Methyl 3-S-phenyl-3-deoxy- $\alpha$ -D-allo/glucofuranoside (**3b**)

$^1\text{H}$  NMR, 400 MHz,  $\text{CD}_3\text{OD}$  of compound **3b**

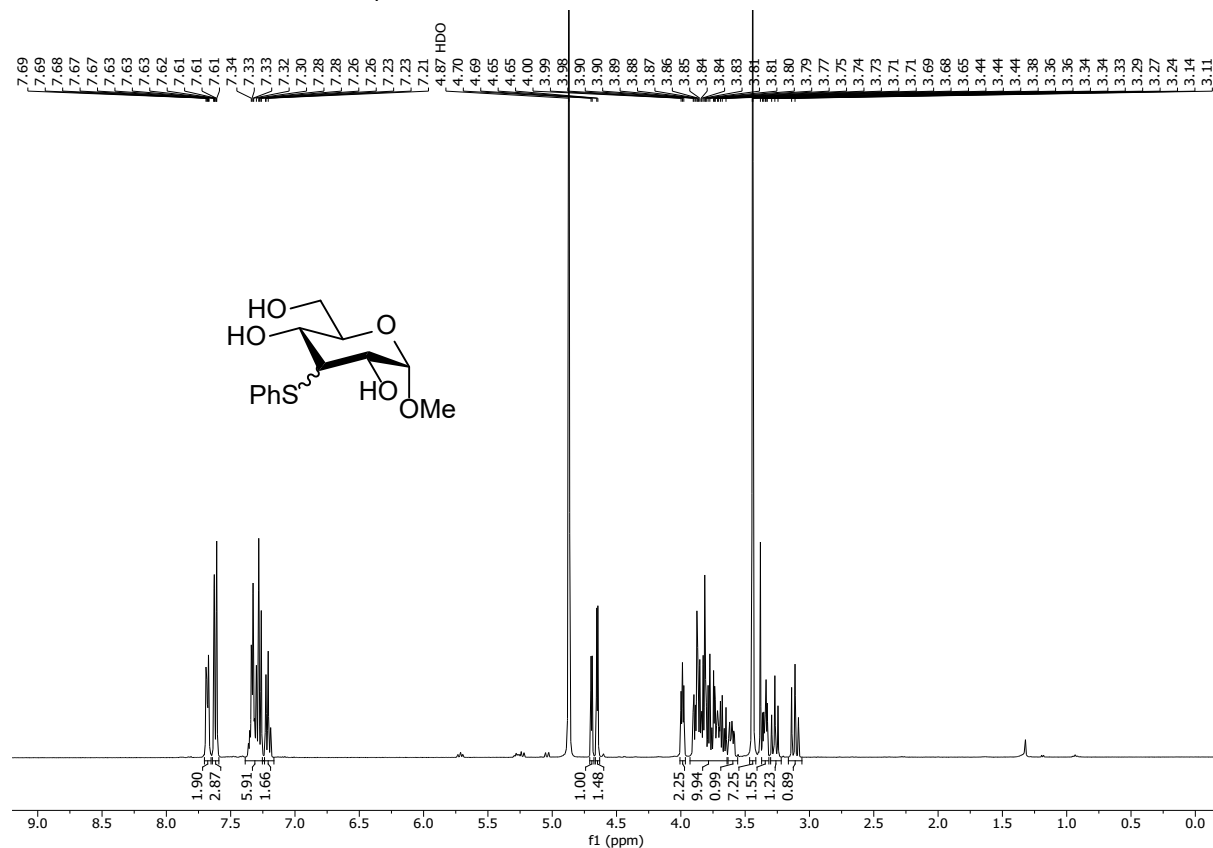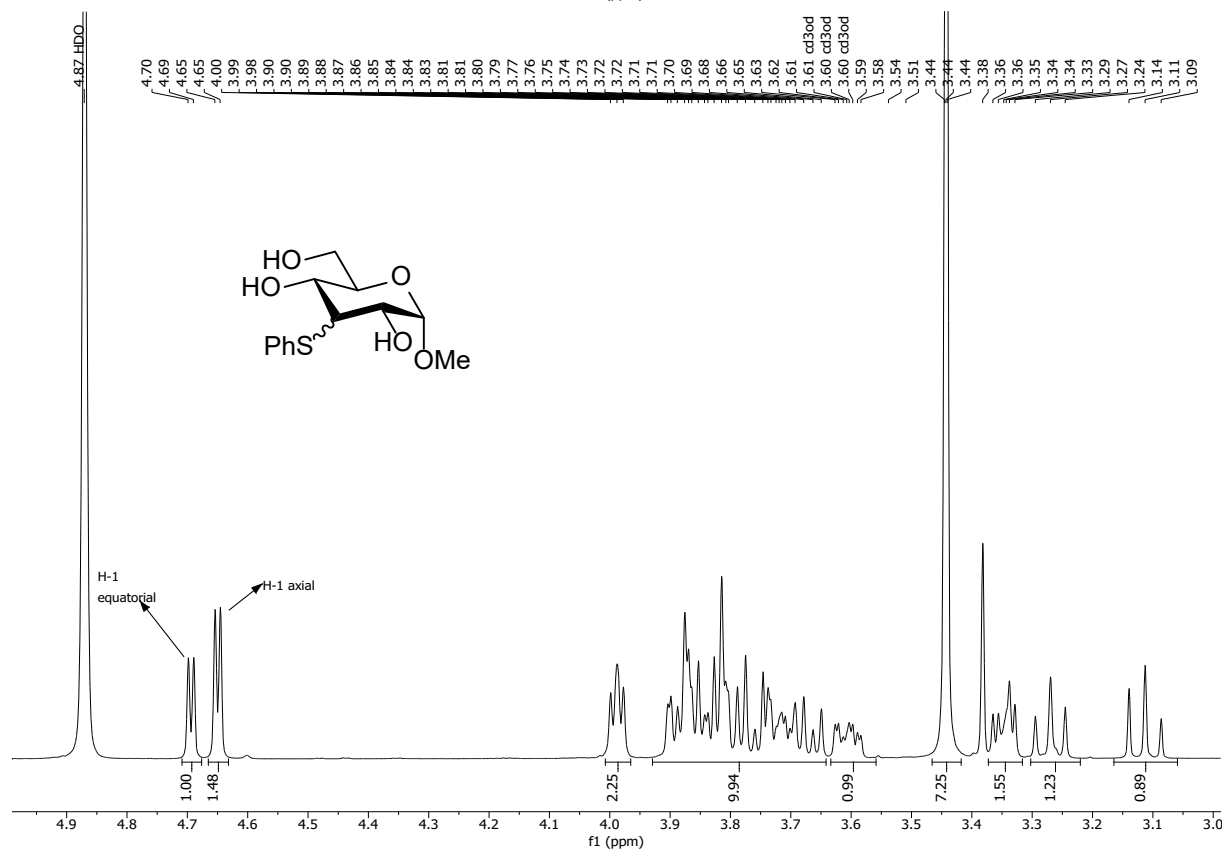

$^{13}\text{C}$  NMR, 101 MHz,  $\text{CD}_3\text{OD}$  of compound **3b**

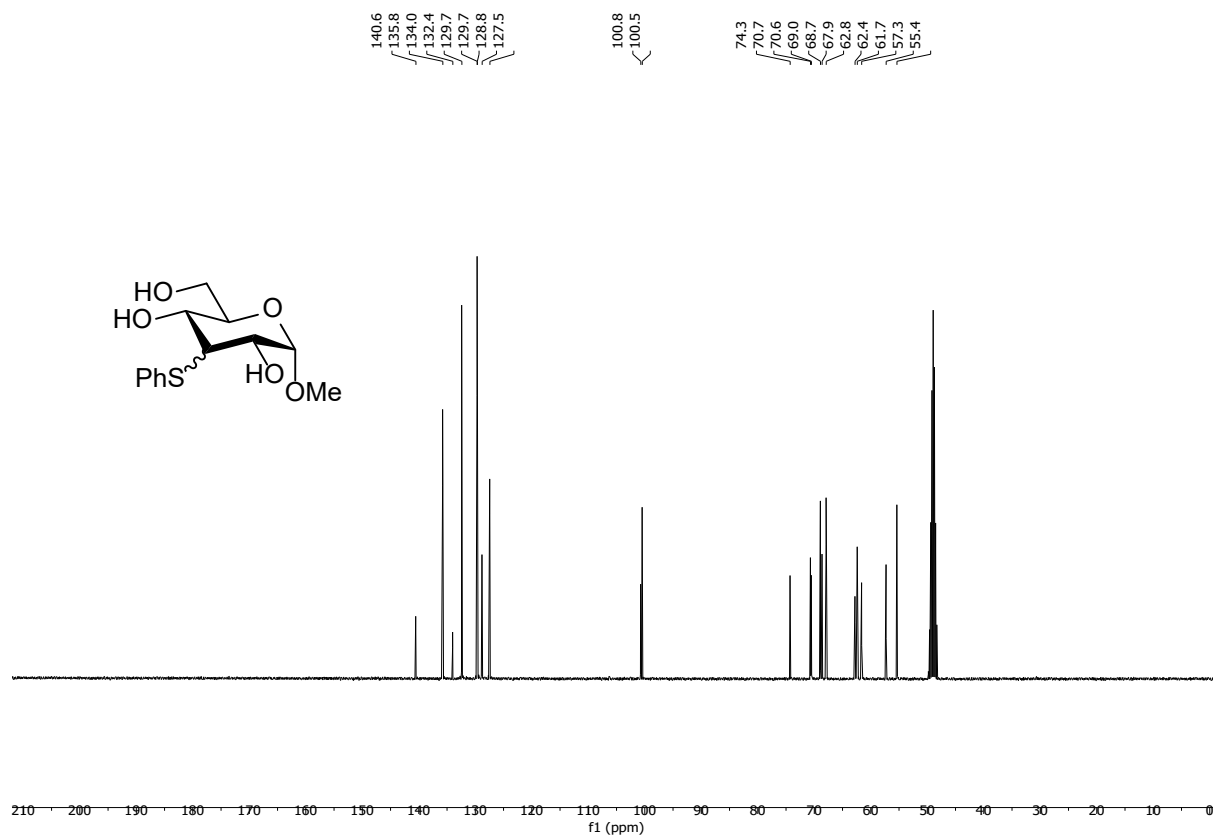

$^1\text{H}$ - $^1\text{H}$  COSY of compound **3b**

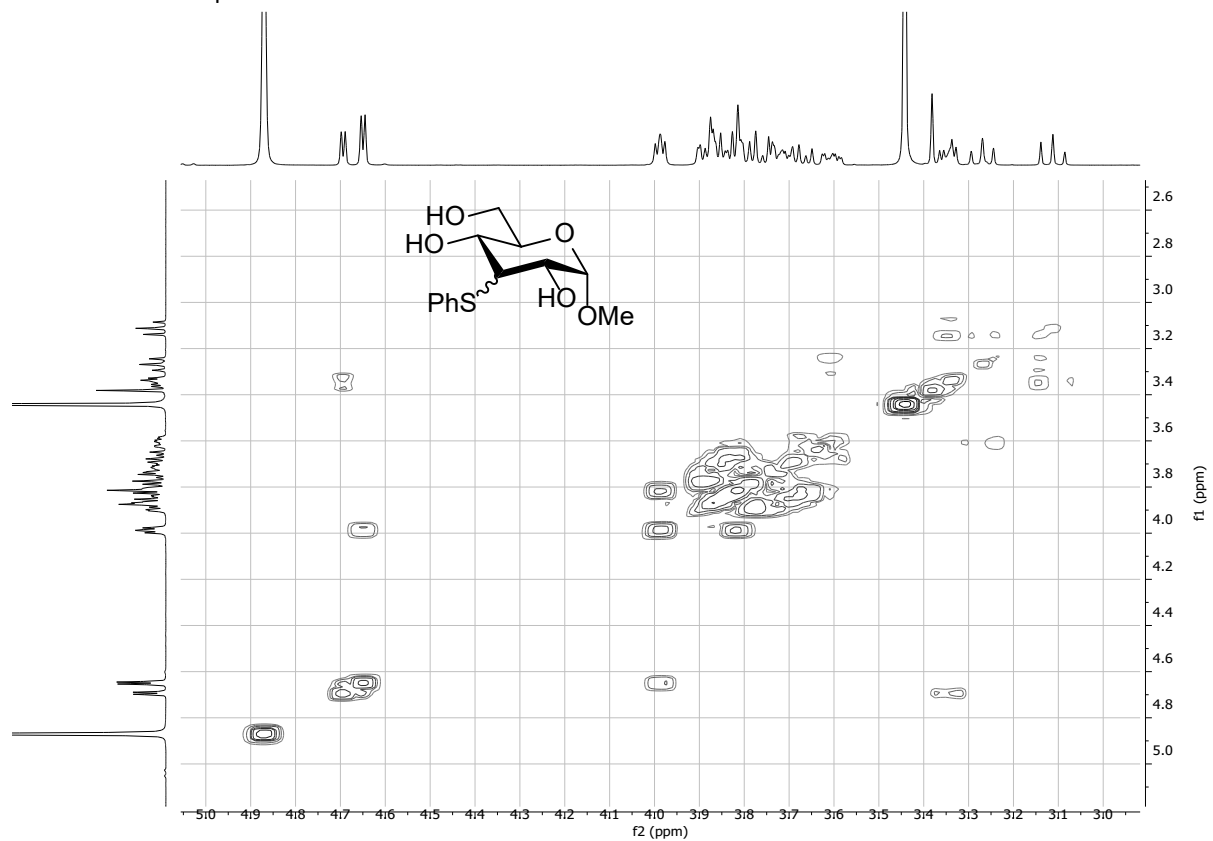

$^1\text{H}$ - $^{13}\text{C}$  HSQC of compound **3b**

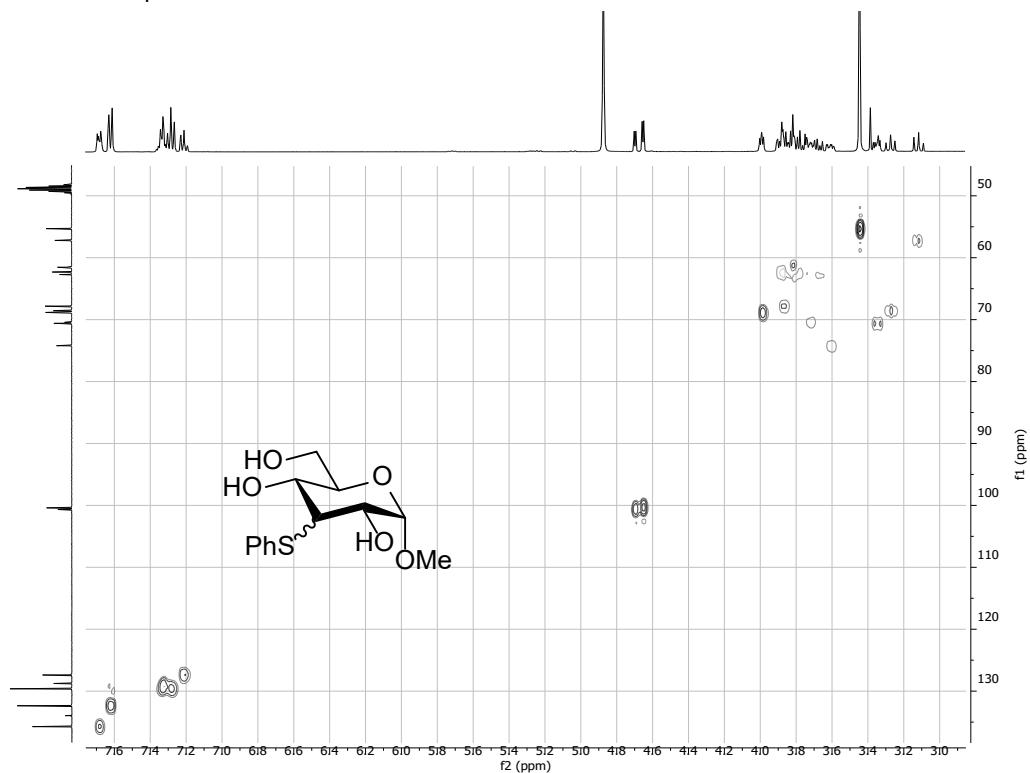

Methyl 3-S-phenyl-3-deoxy- $\alpha$ -D-allo/glucoyranoside (**3c**)

$^1\text{H}$  NMR, 400 MHz,  $\text{CD}_3\text{OD}$  of compound **3c**

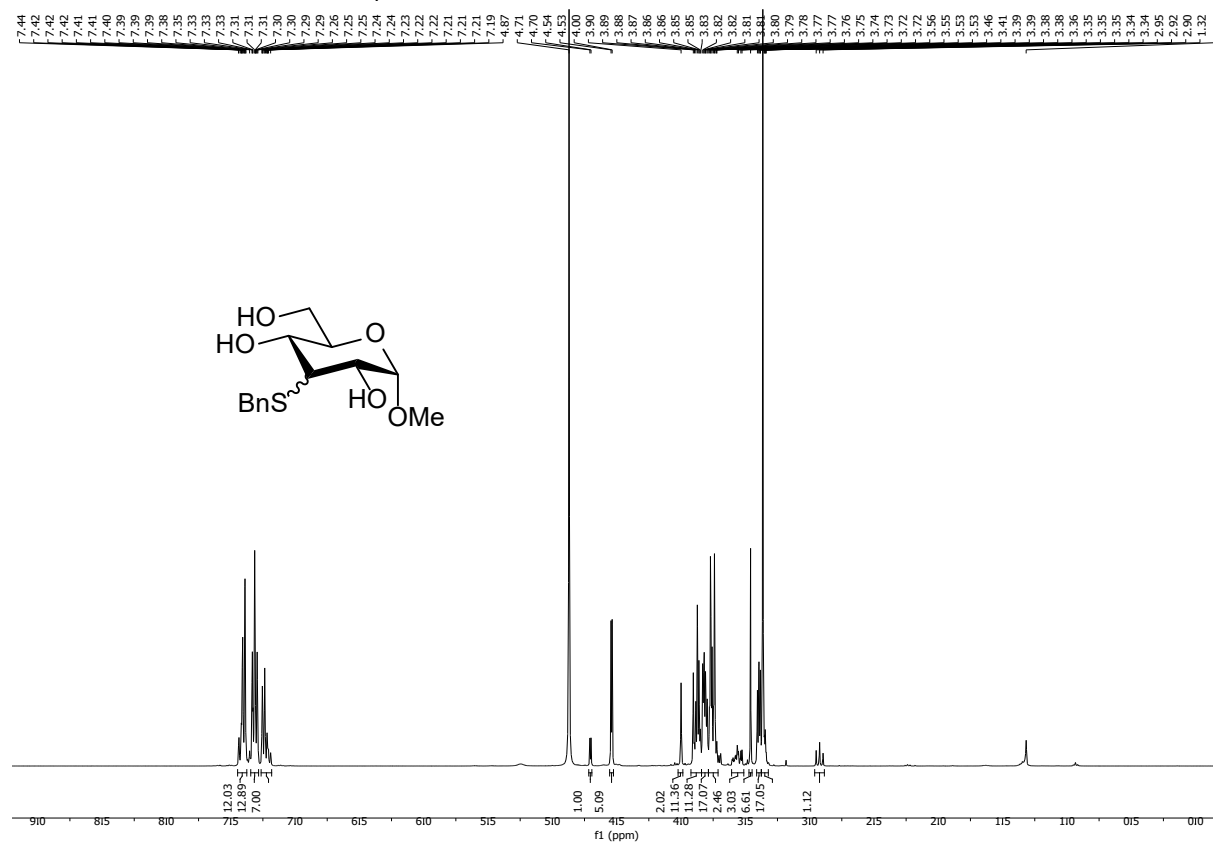

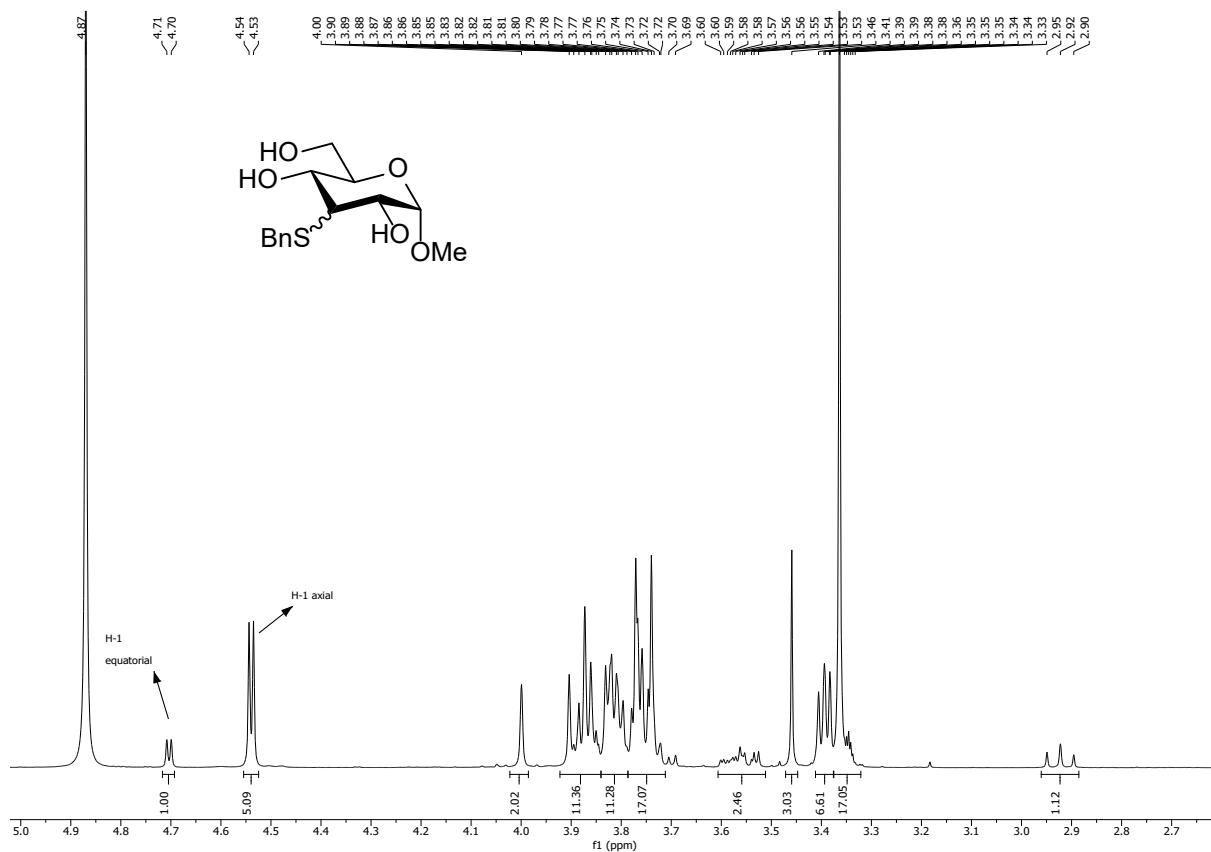

<sup>13</sup>C NMR, 101 MHz, CD<sub>3</sub>OD of compound 3c

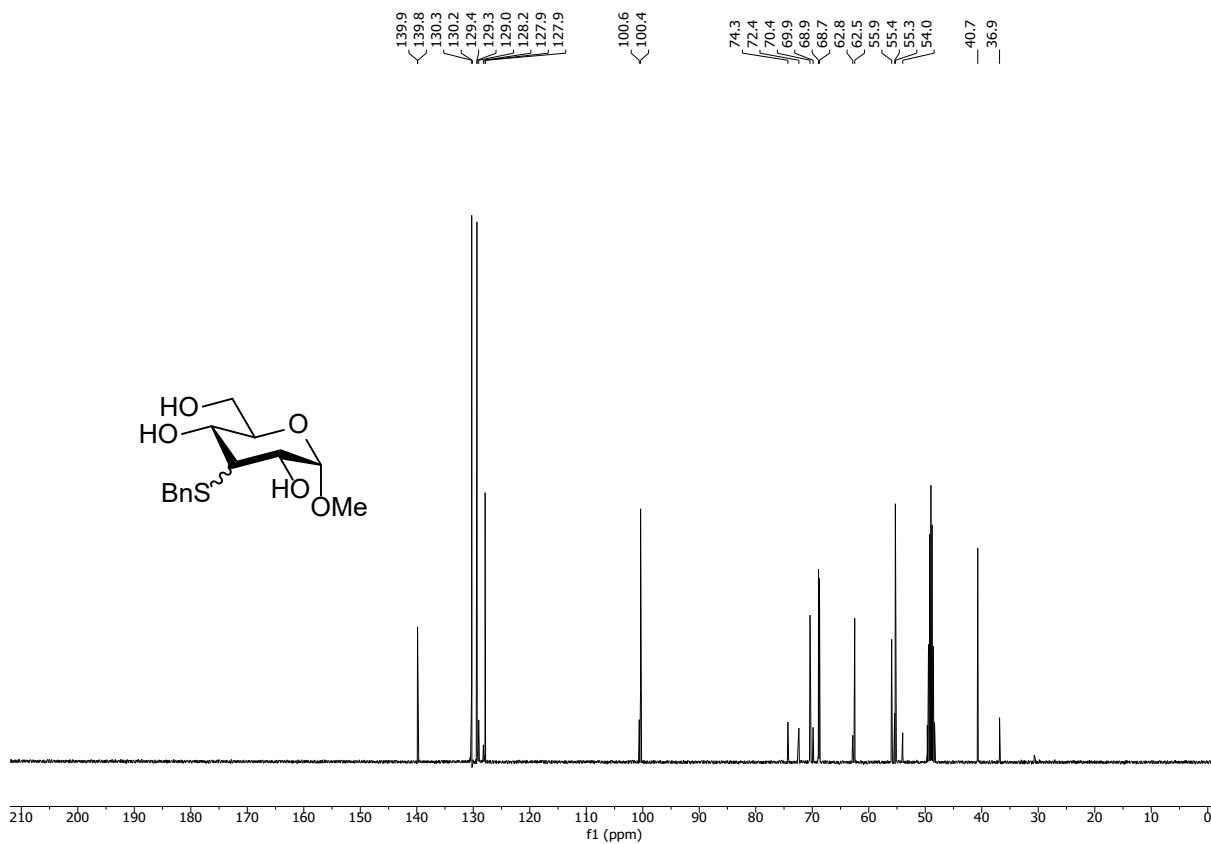

$^1\text{H}$ - $^1\text{H}$  COSY of compound **3c**

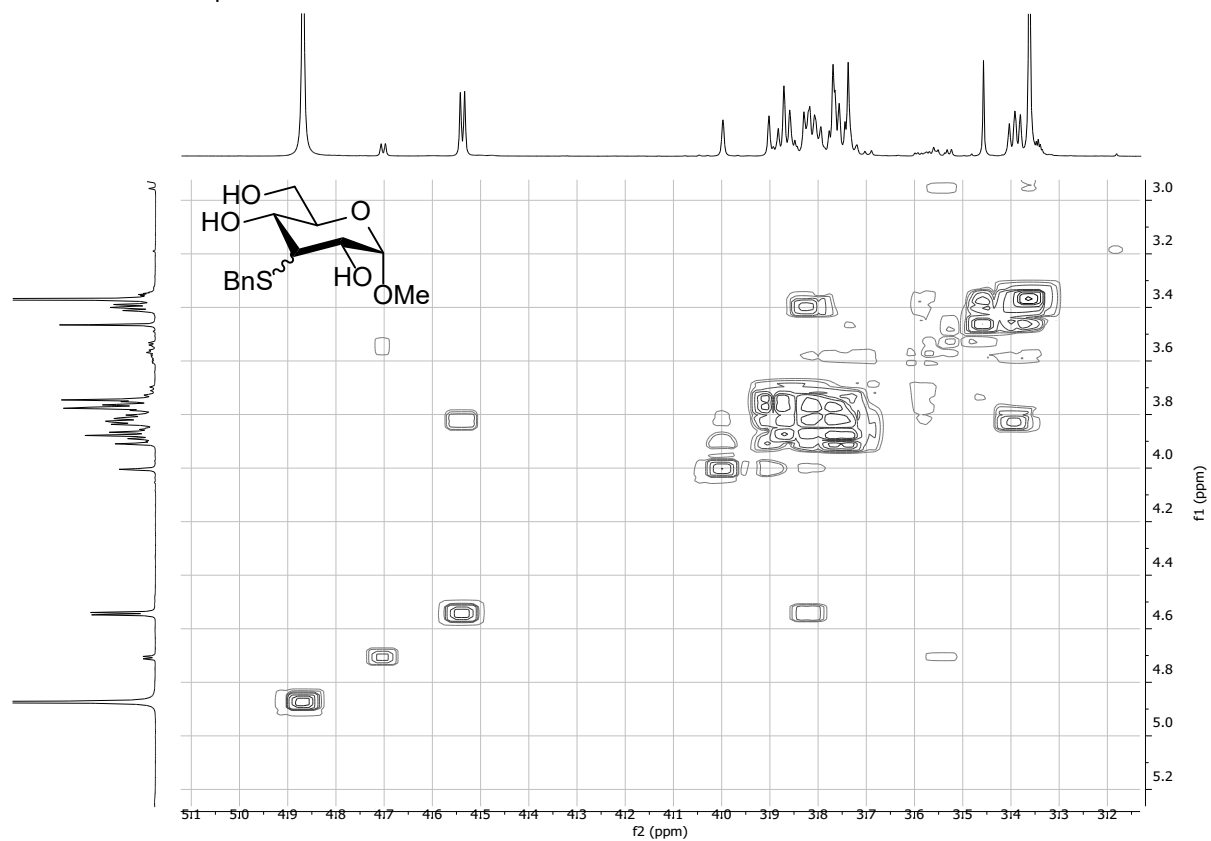

$^1\text{H}$ - $^{13}\text{C}$  HSQC of compound **3c**

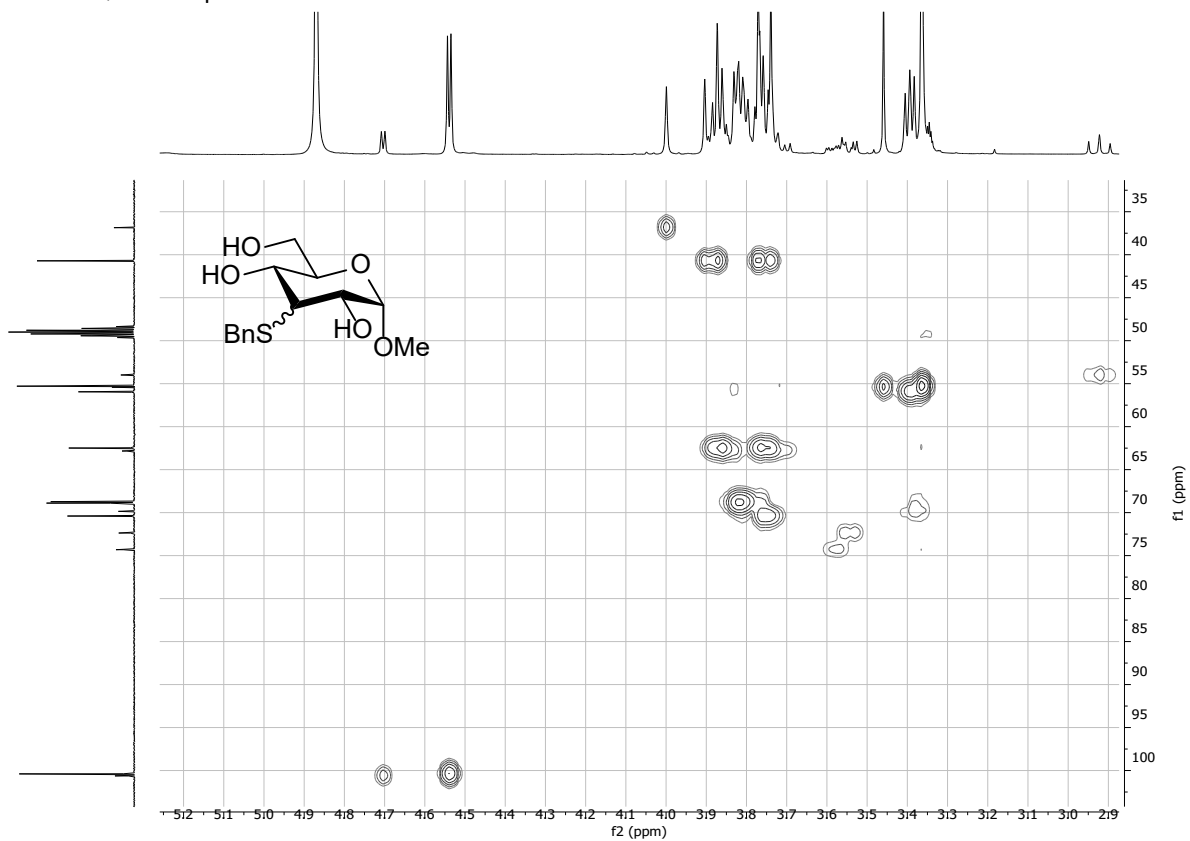

## NMR spectra of Xyl derivatives

### Methyl 3-deoxy-3-S-ethyl- $\alpha$ -D-ribose/xylopyranoside (**8a**)

Equatorial/axial mixture:

$^1\text{H}$  NMR, 400 MHz,  $\text{CD}_3\text{OD}$  of compound **8a**

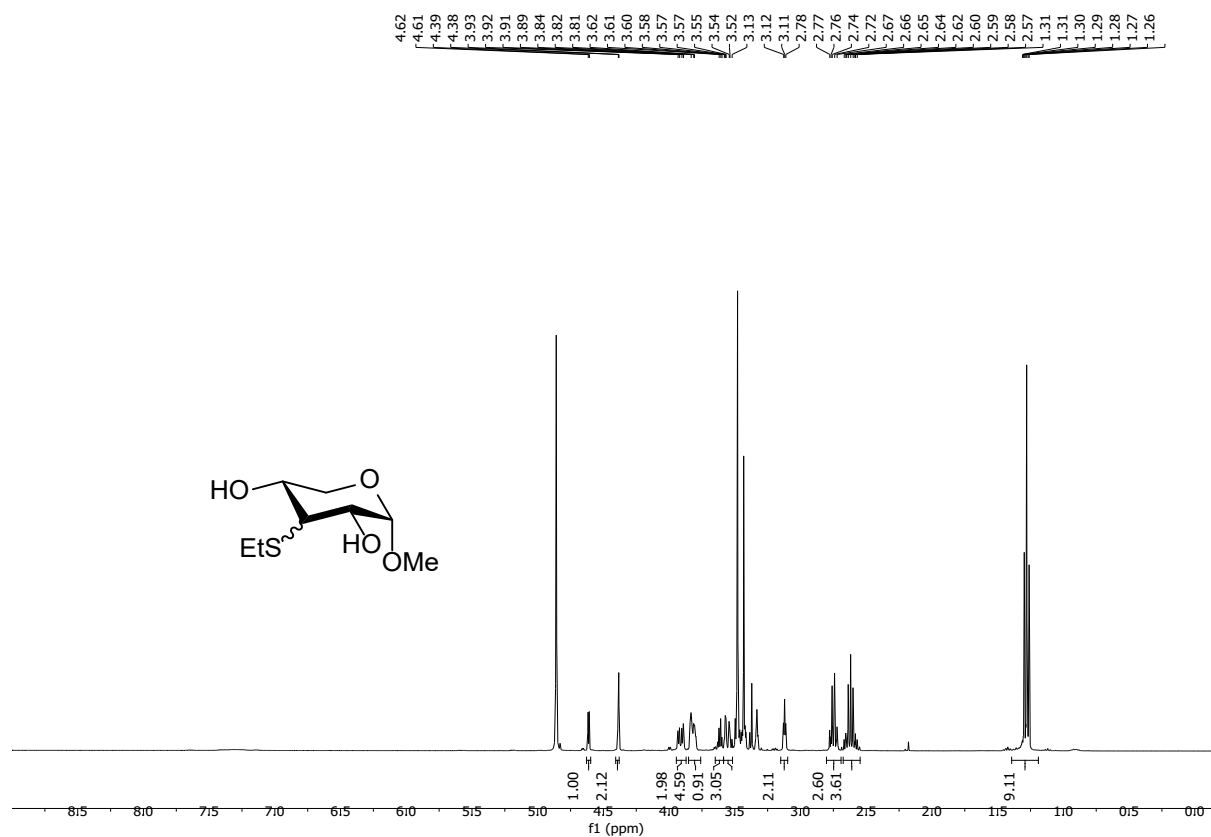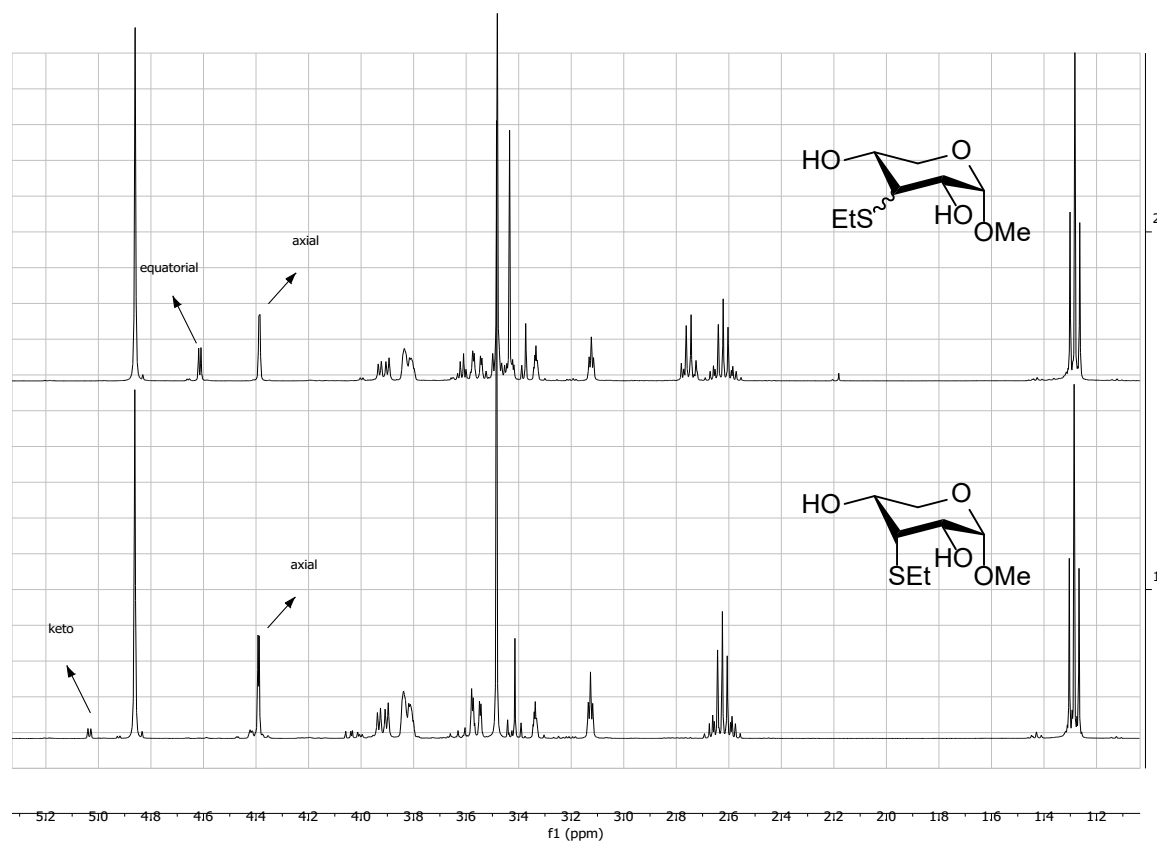



$^{13}\text{C}$  NMR, 101 MHz,  $\text{CD}_3\text{OD}$  of compound **8a**

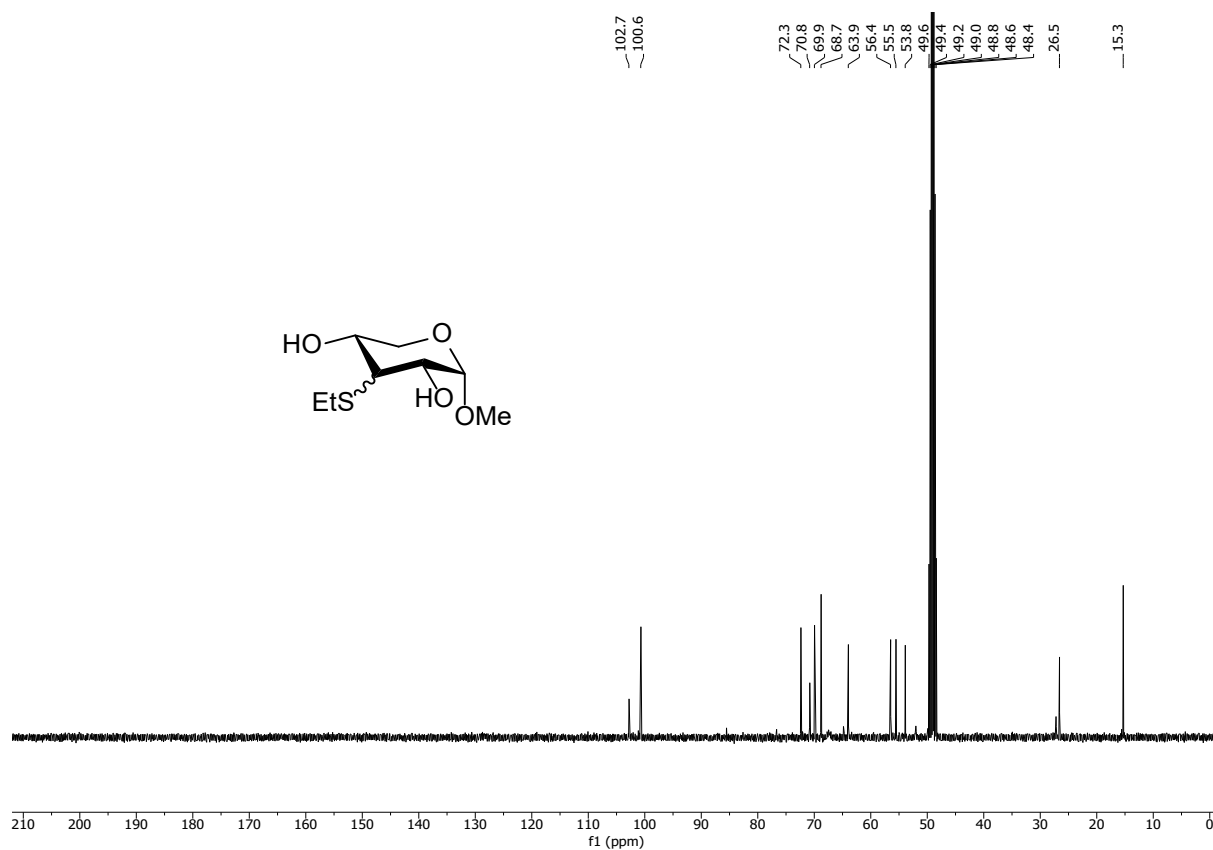

$^1\text{H}$ - $^1\text{H}$  COSY of compound **8a**

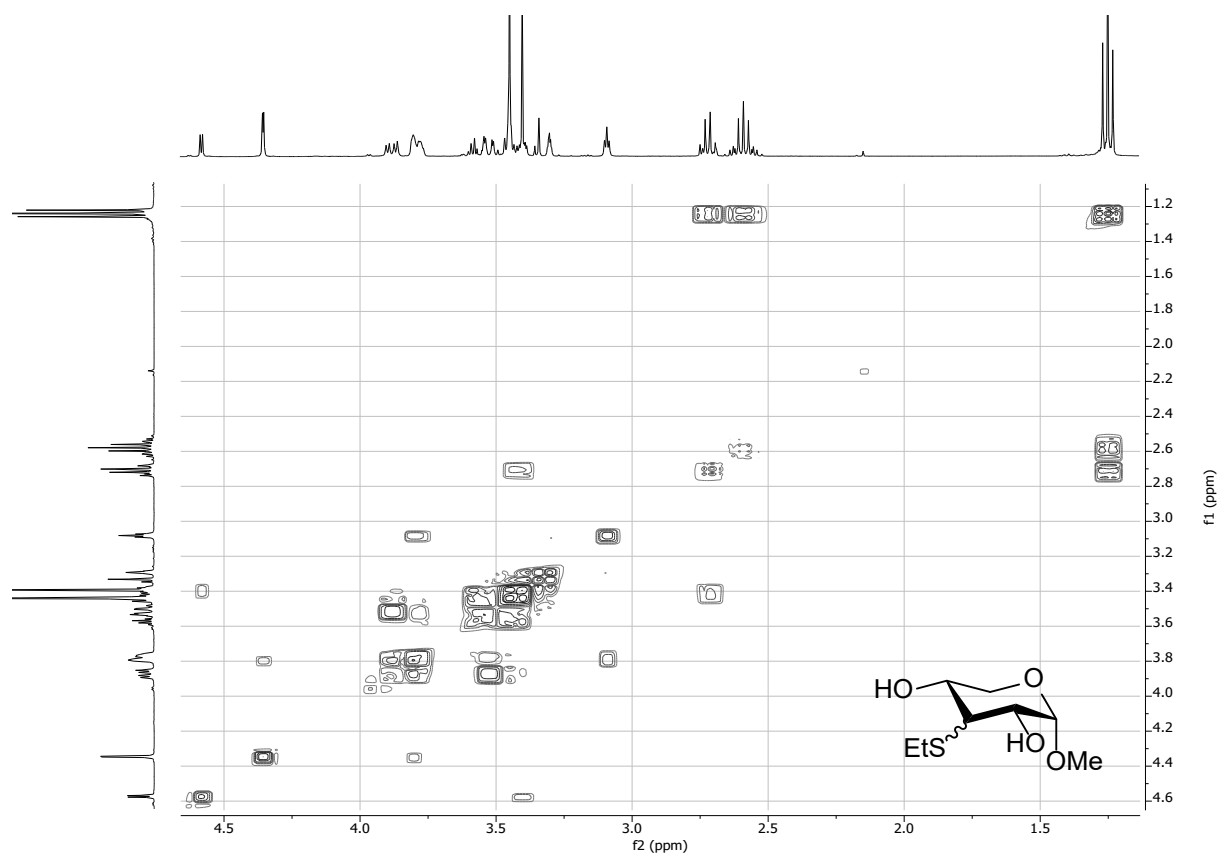

$^1\text{H}$ - $^{13}\text{C}$  HSQC of compound **8a**

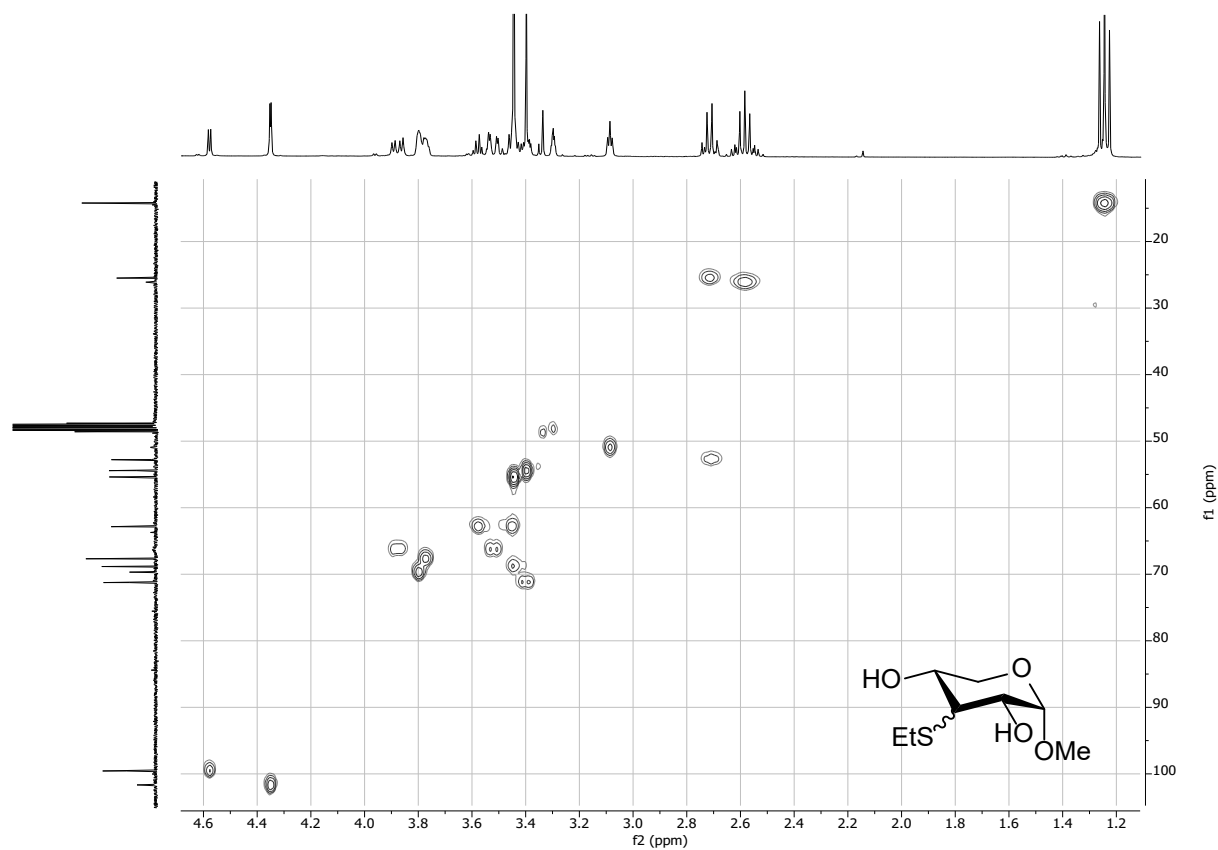

$^1\text{H}$  NMR, 400 MHz,  $\text{CD}_3\text{OD}$  of compound **8a**

Axial:

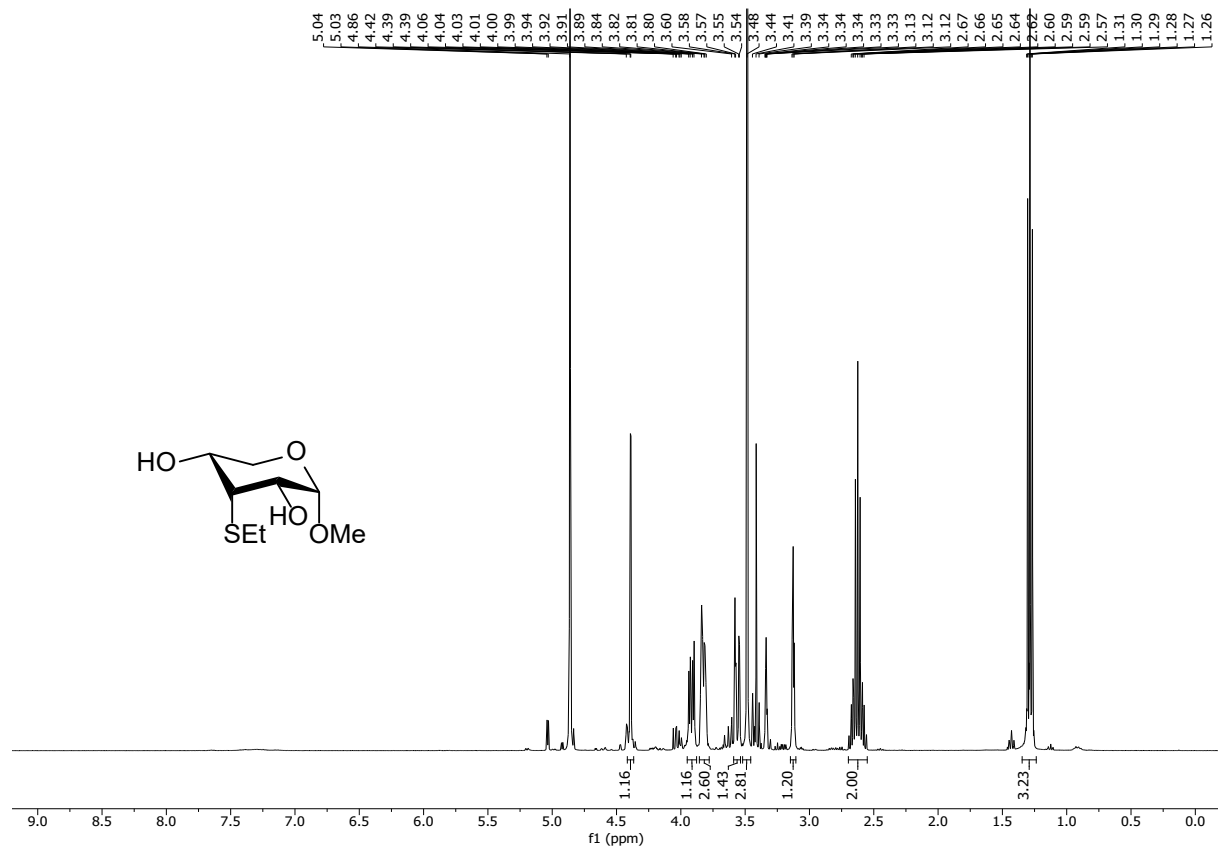

$^{13}\text{C}$  NMR, 101 MHz,  $\text{CD}_3\text{OD}$  of compound **8a**

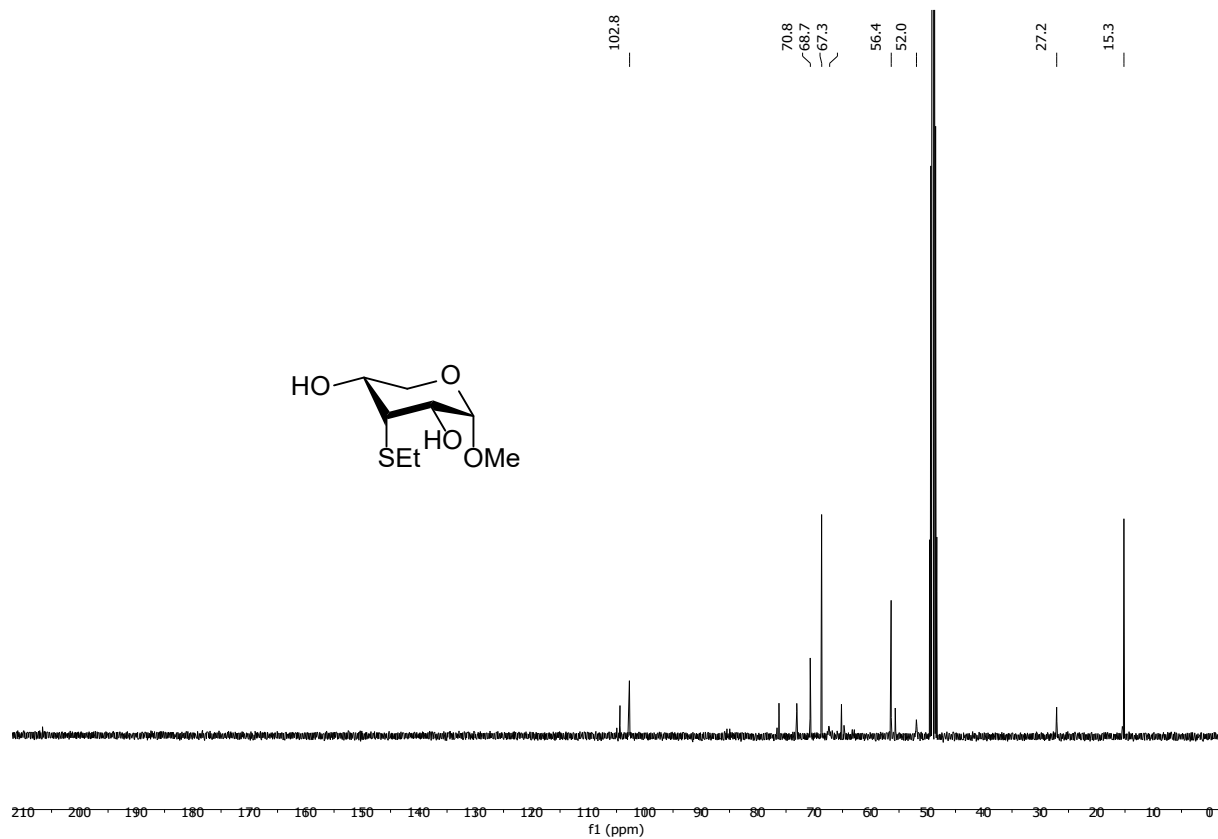

$^1\text{H}$ - $^1\text{H}$  COSY of compound **8a**

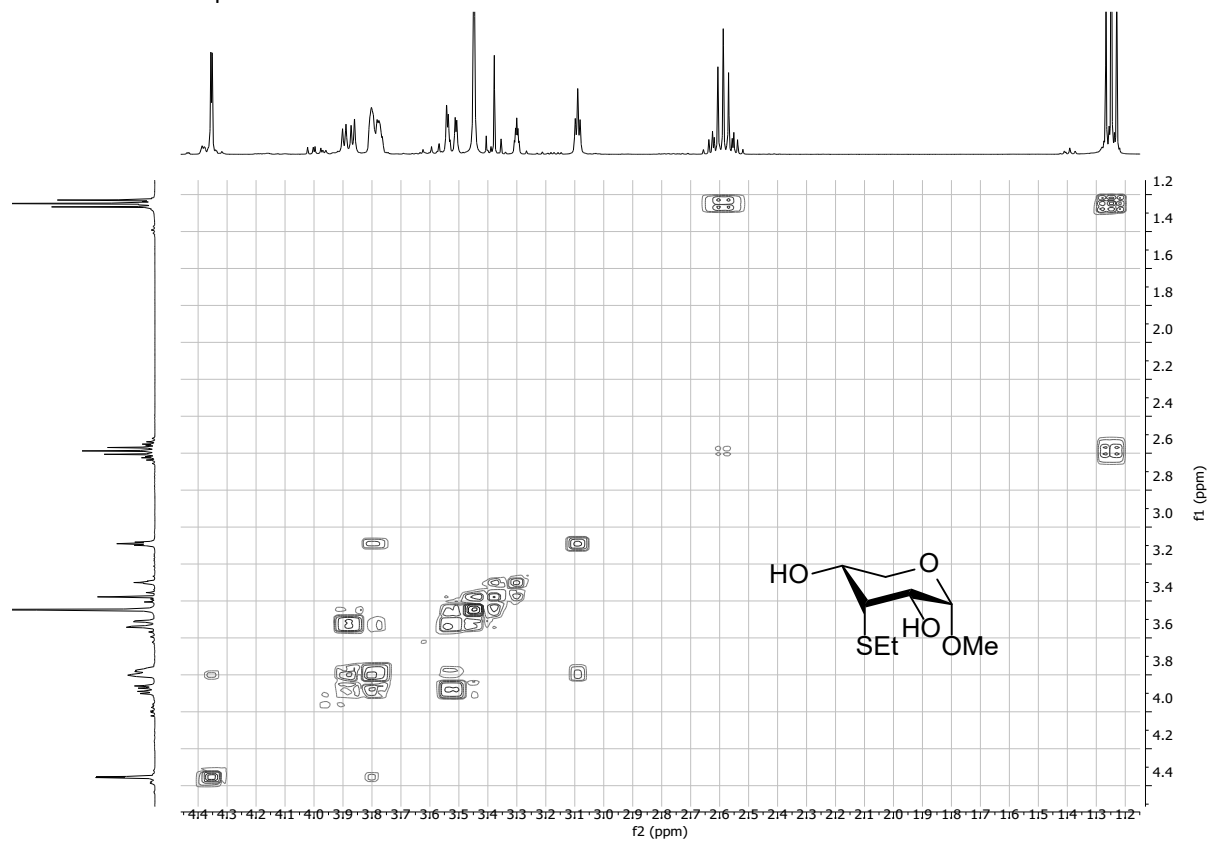

$^1\text{H}$ - $^{13}\text{C}$  HSQC of compound **8a**

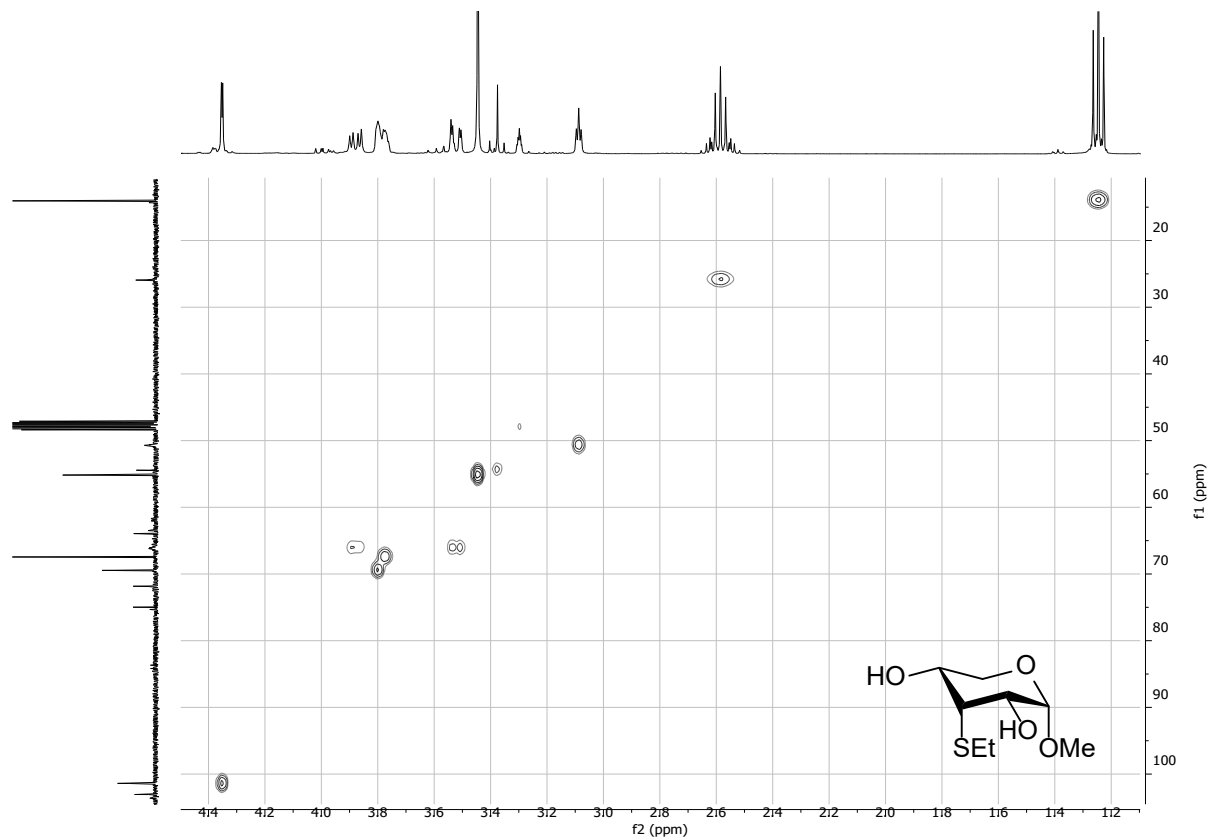

Methyl 3-S-benzyl-3-deoxy- $\alpha$ -D-ribo/xylopyranoside (**8b**)

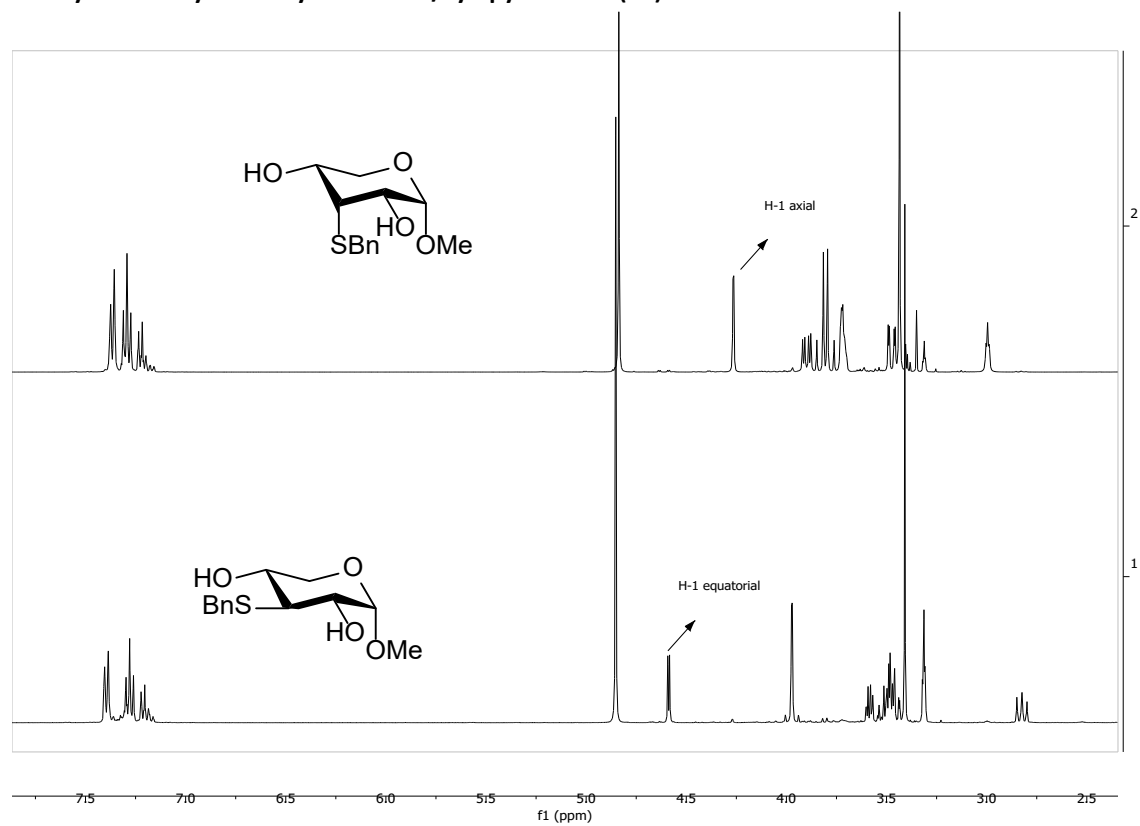

Equatorial:

$^1\text{H}$  NMR, 400 MHz,  $\text{CD}_3\text{OD}$  of compound **8b**

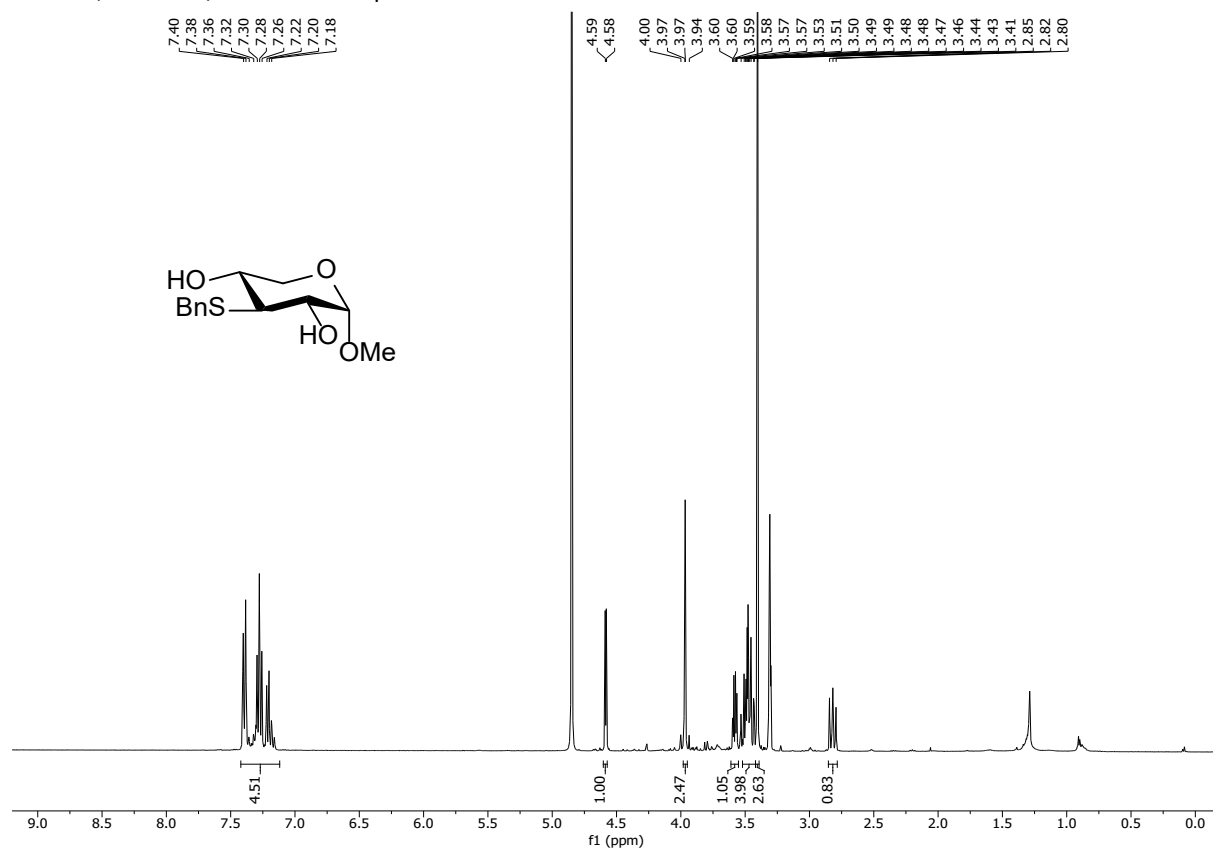

$^{13}\text{C}$  NMR, 101 MHz,  $\text{CD}_3\text{OD}$  of compound **8b**

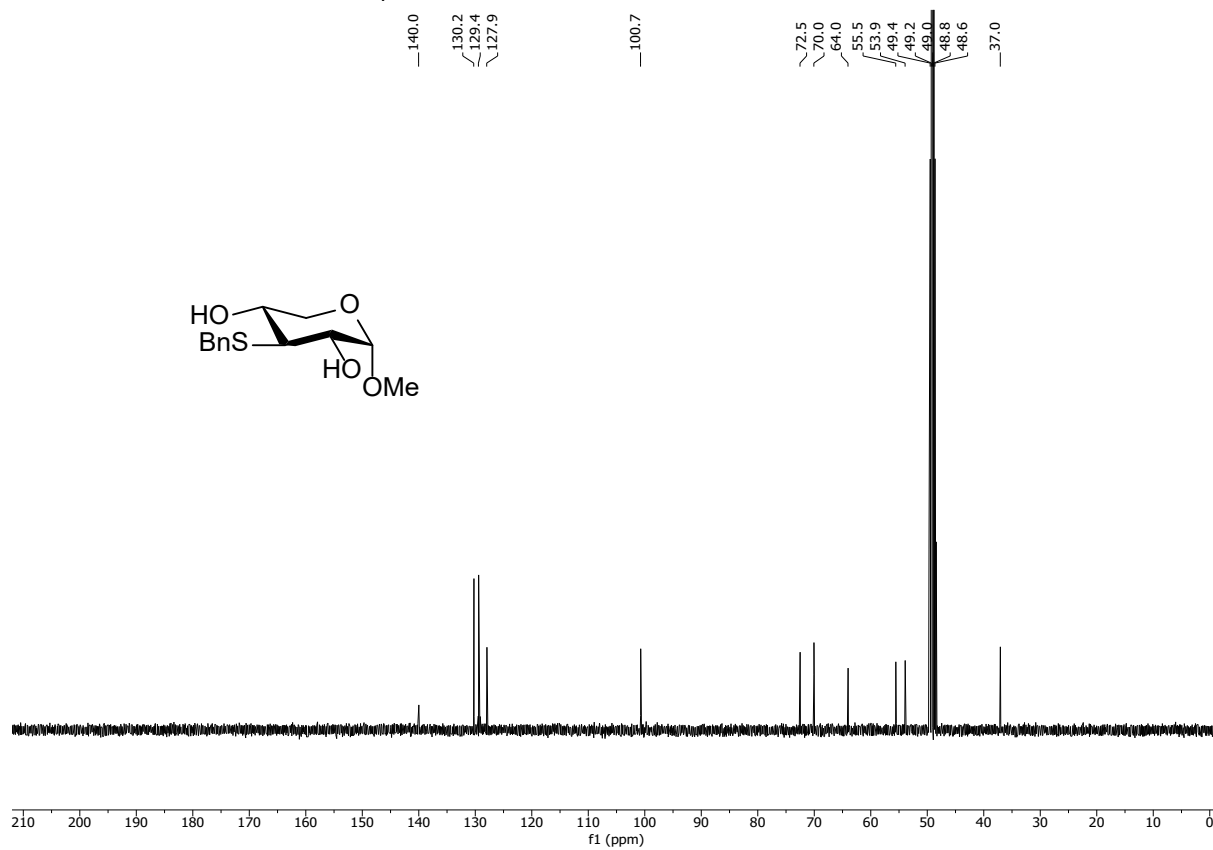

$^1\text{H}$ - $^1\text{H}$  COSY of compound **8b**

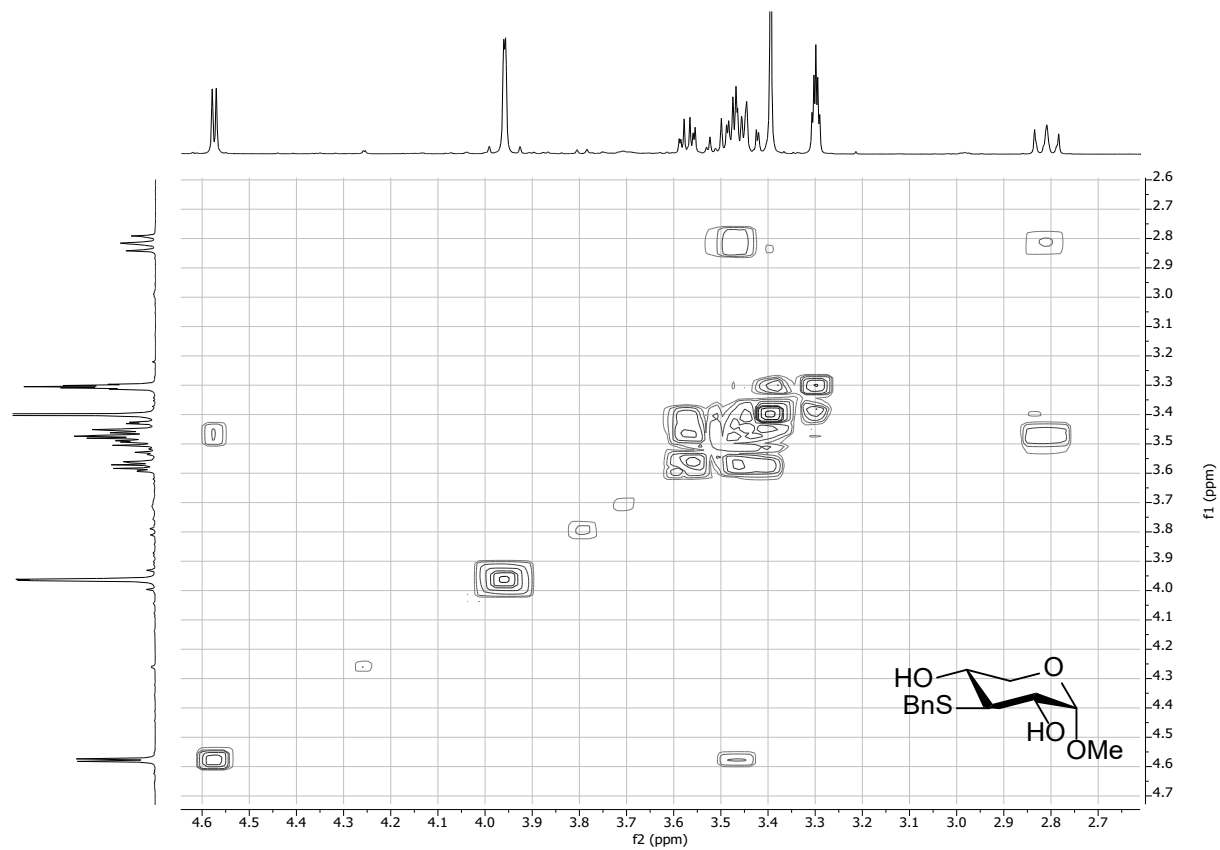

$^1\text{H}$ - $^{13}\text{C}$  HSQC of compound **8b**

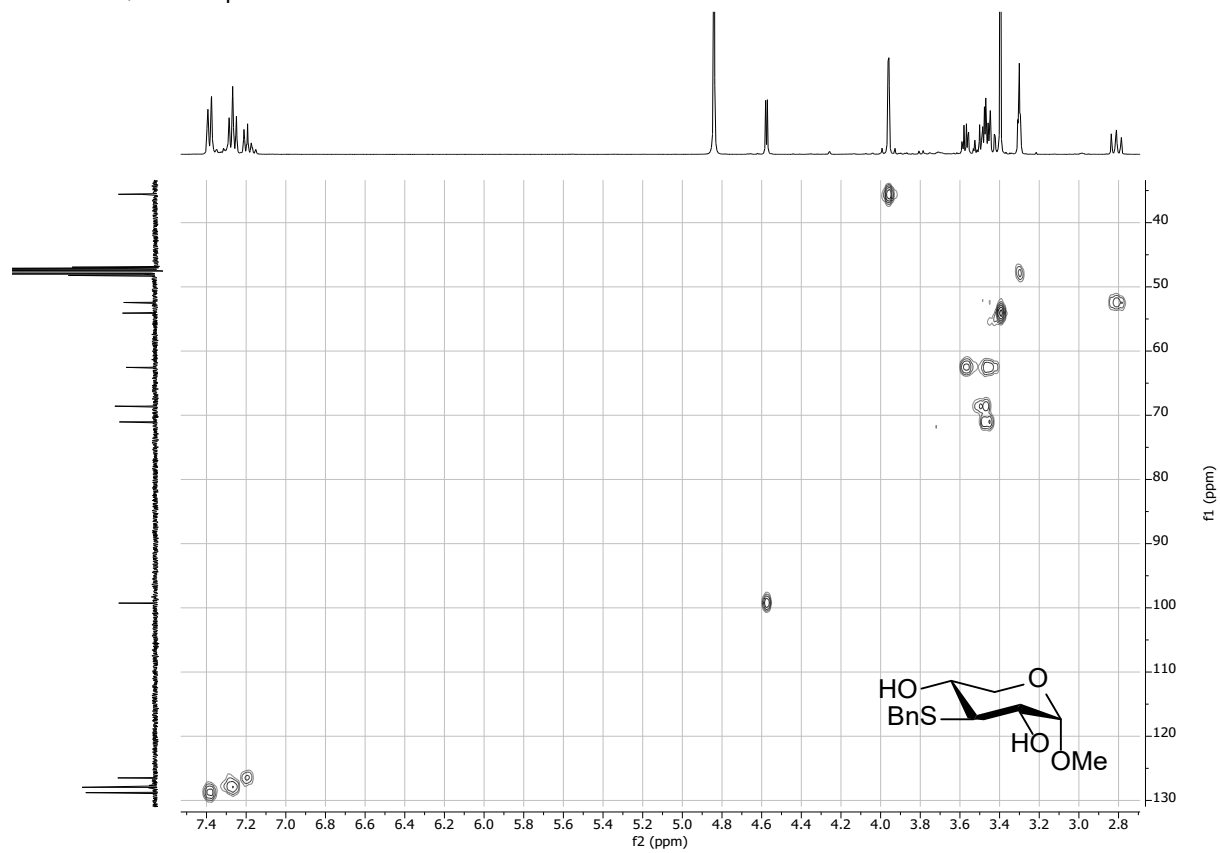

Axial:

$^1\text{H}$  NMR, 400 MHz,  $\text{CD}_3\text{OD}$  of compound **8b**

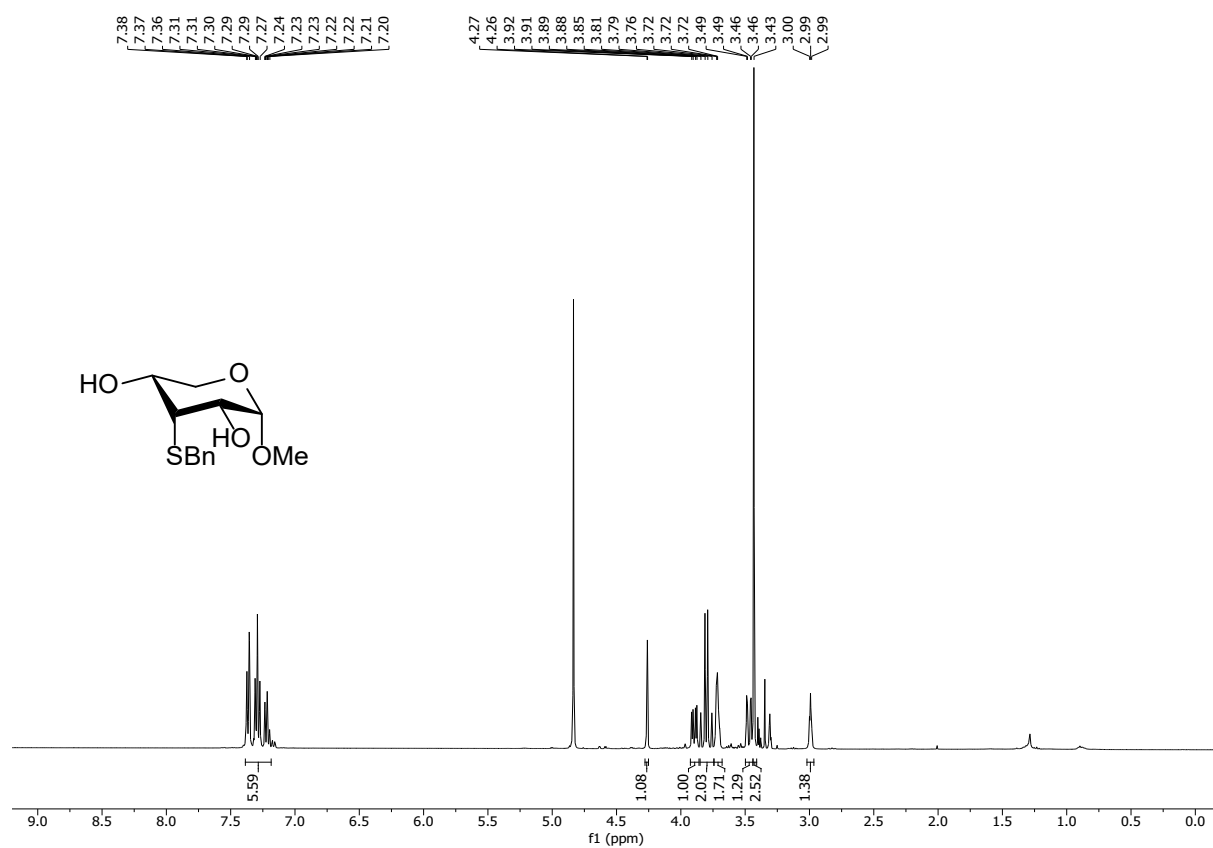

$^{13}\text{C}$  NMR, 101 MHz,  $\text{CD}_3\text{OD}$  of compound **8b**

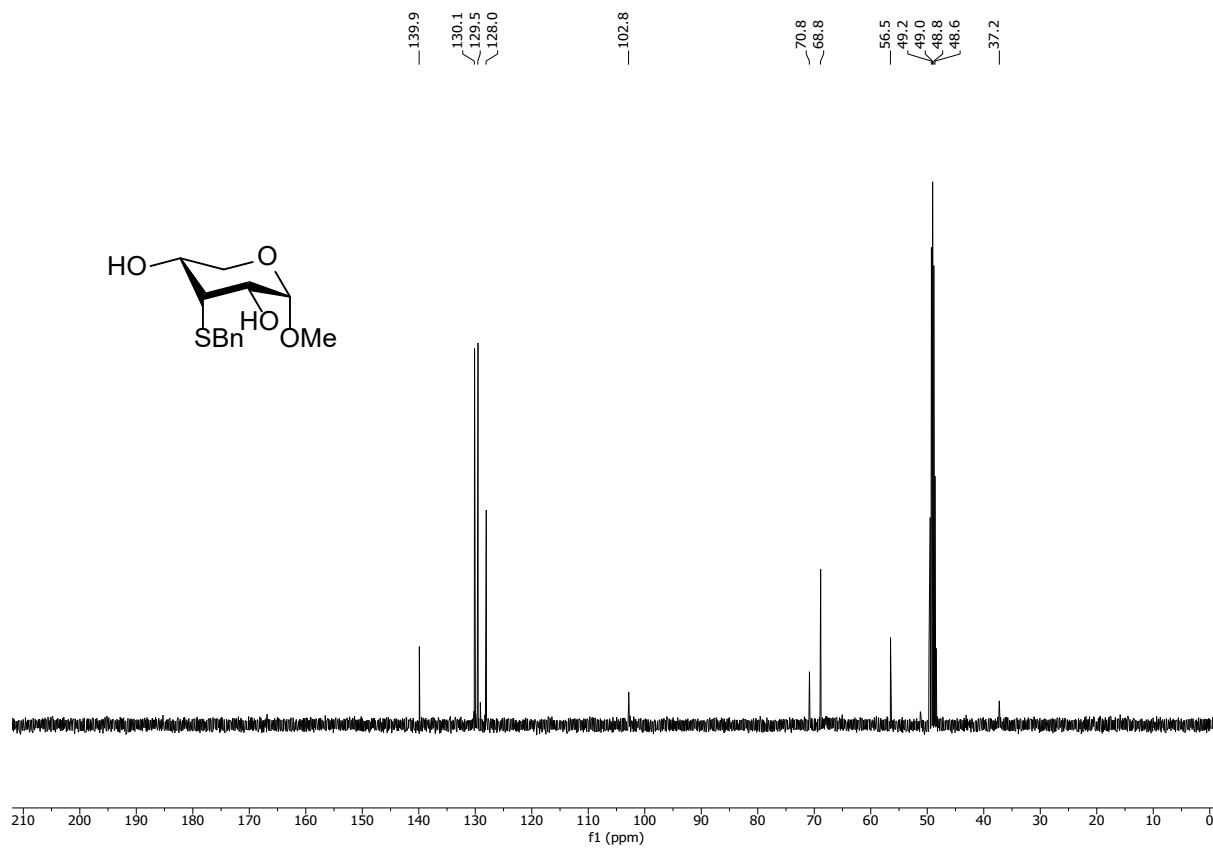

$^1\text{H}$ - $^1\text{H}$  COSY of compound **8b**

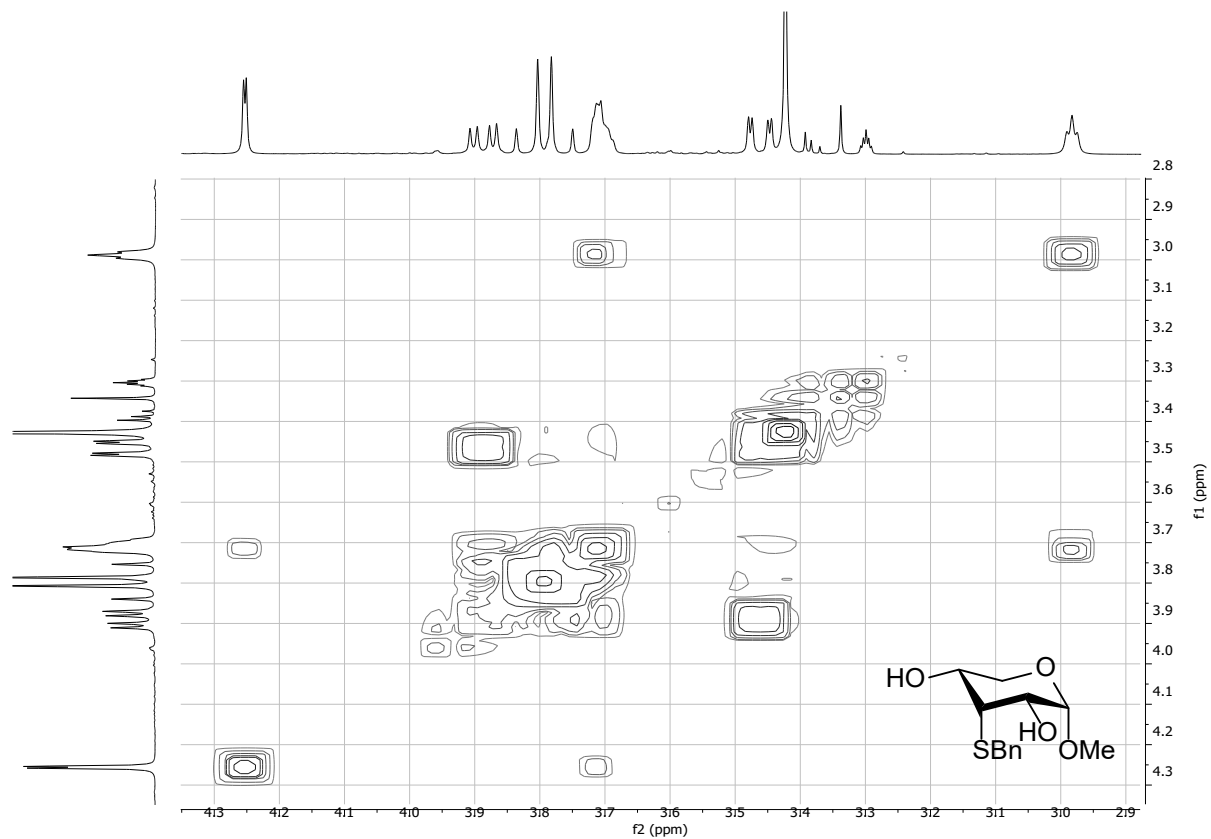

$^1\text{H}$ - $^{13}\text{C}$  HSQC of compound **8b**

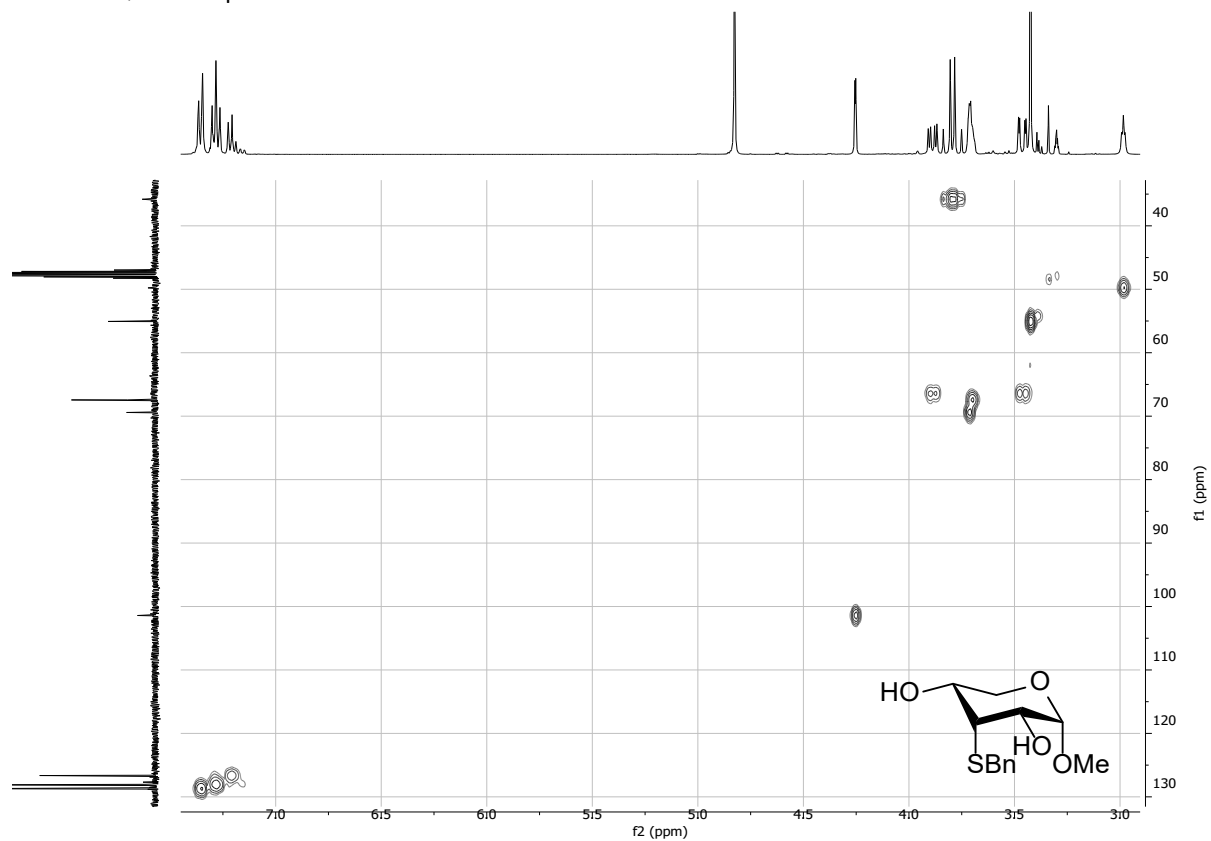



### Methyl 3-S-acetyl-3-deoxy- $\alpha$ -D-ribo/xylopyranoside (**8c**)

$^1\text{H}$  NMR, 400 MHz,  $\text{CD}_3\text{OD}$  of compound **8c**

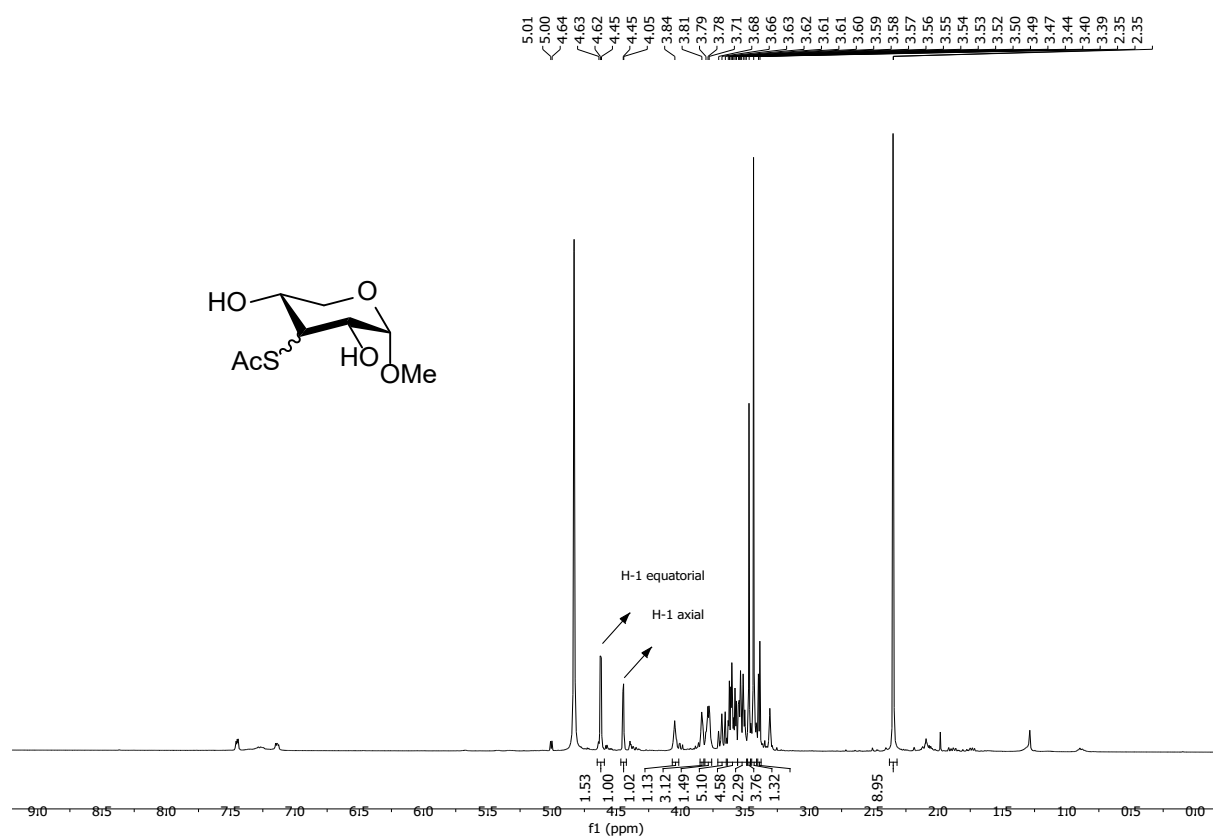

$^{13}\text{C}$  NMR, 101 MHz,  $\text{CD}_3\text{OD}$  of compound **8c**

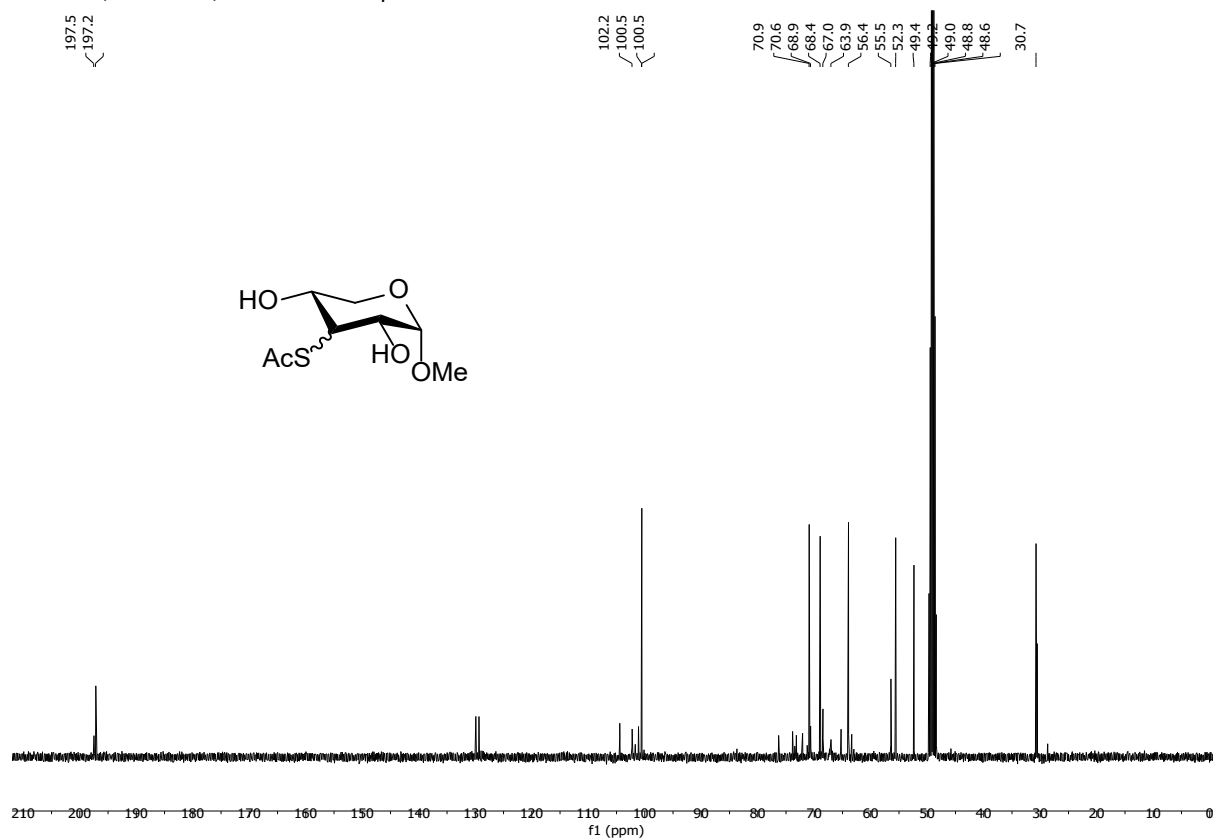

$^1\text{H}$ - $^1\text{H}$  COSY of compound **8c**

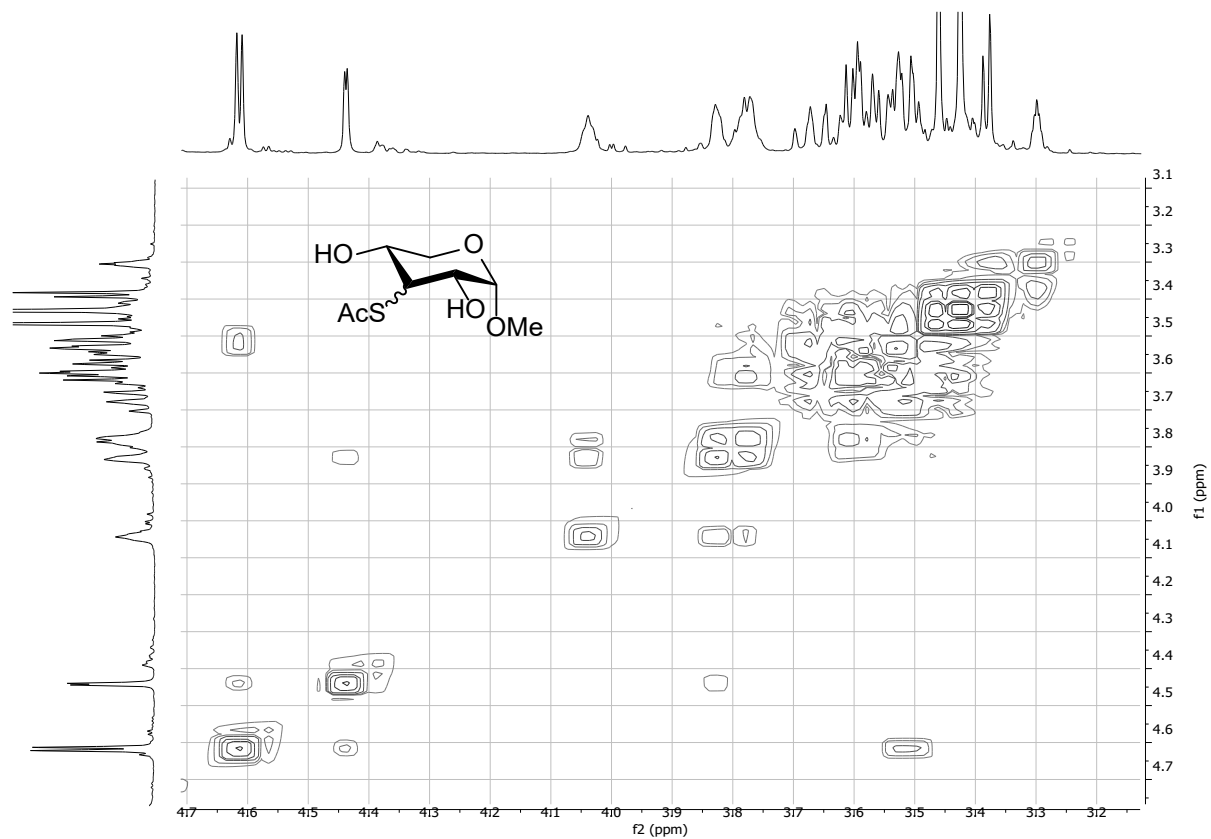

$^1\text{H}$ - $^{13}\text{C}$  HSQC of compound **8c**

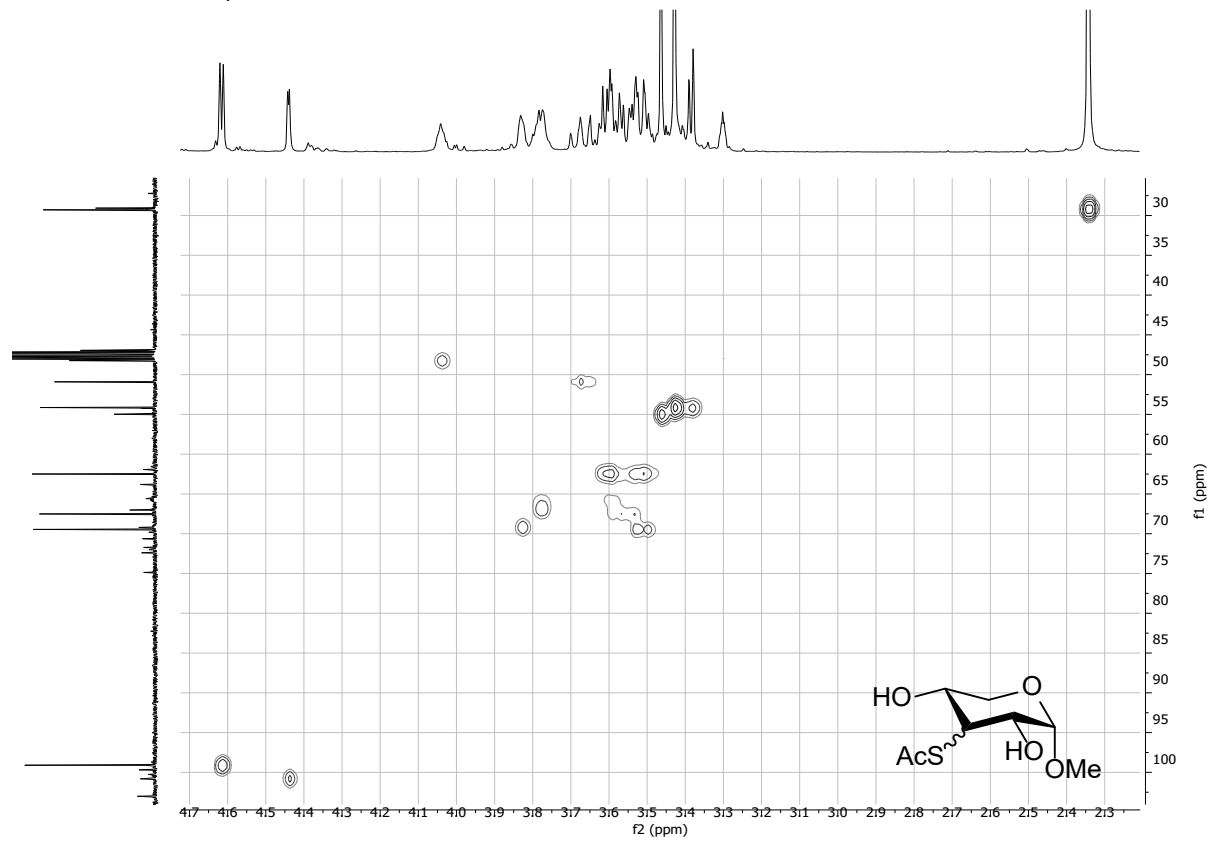

**NMR spectra of Gal derivative and side product S10**  
**Methyl 4-S-acetyl-4-deoxy- $\alpha$ -D-galacto/glucofuranoside (10)**

$^1\text{H}$  NMR, 400 MHz,  $\text{CD}_3\text{OD}$  of compound **10**

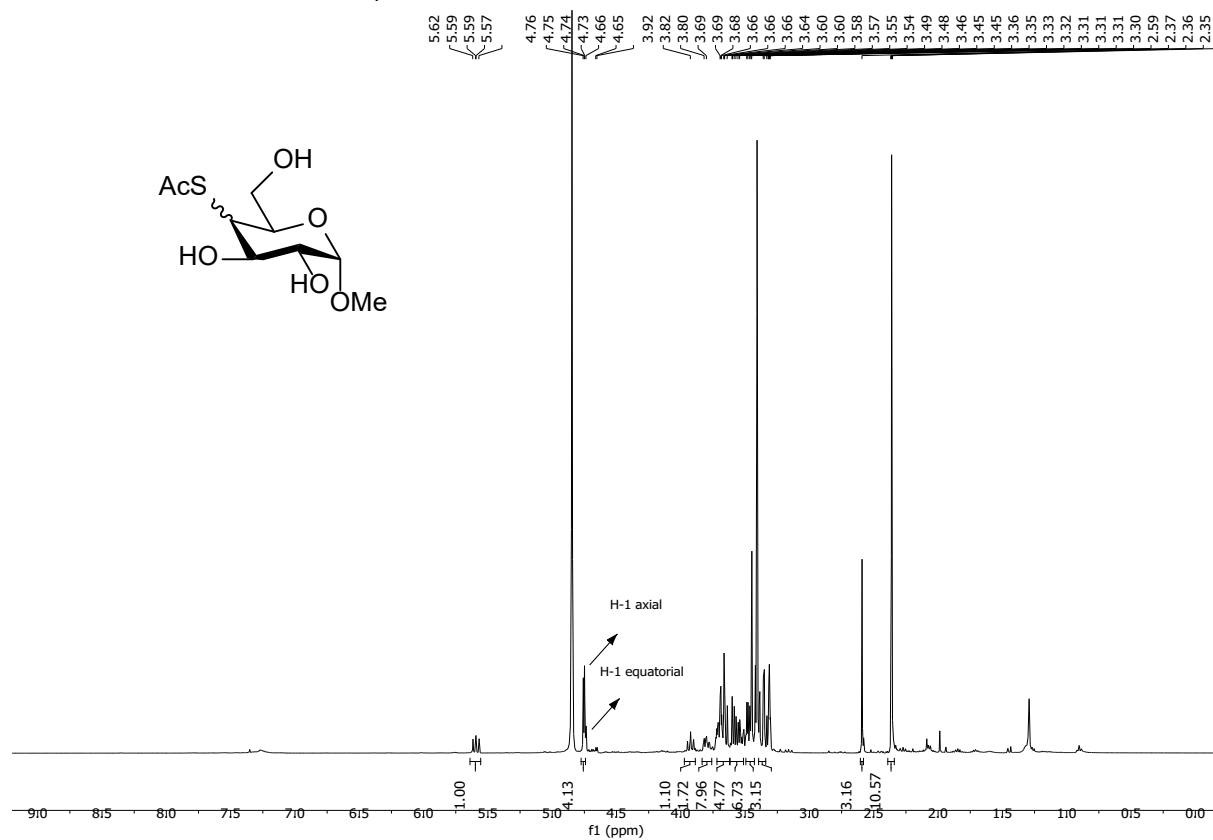

$^{13}\text{C}$  NMR, 101 MHz,  $\text{CD}_3\text{OD}$  of compound **10**

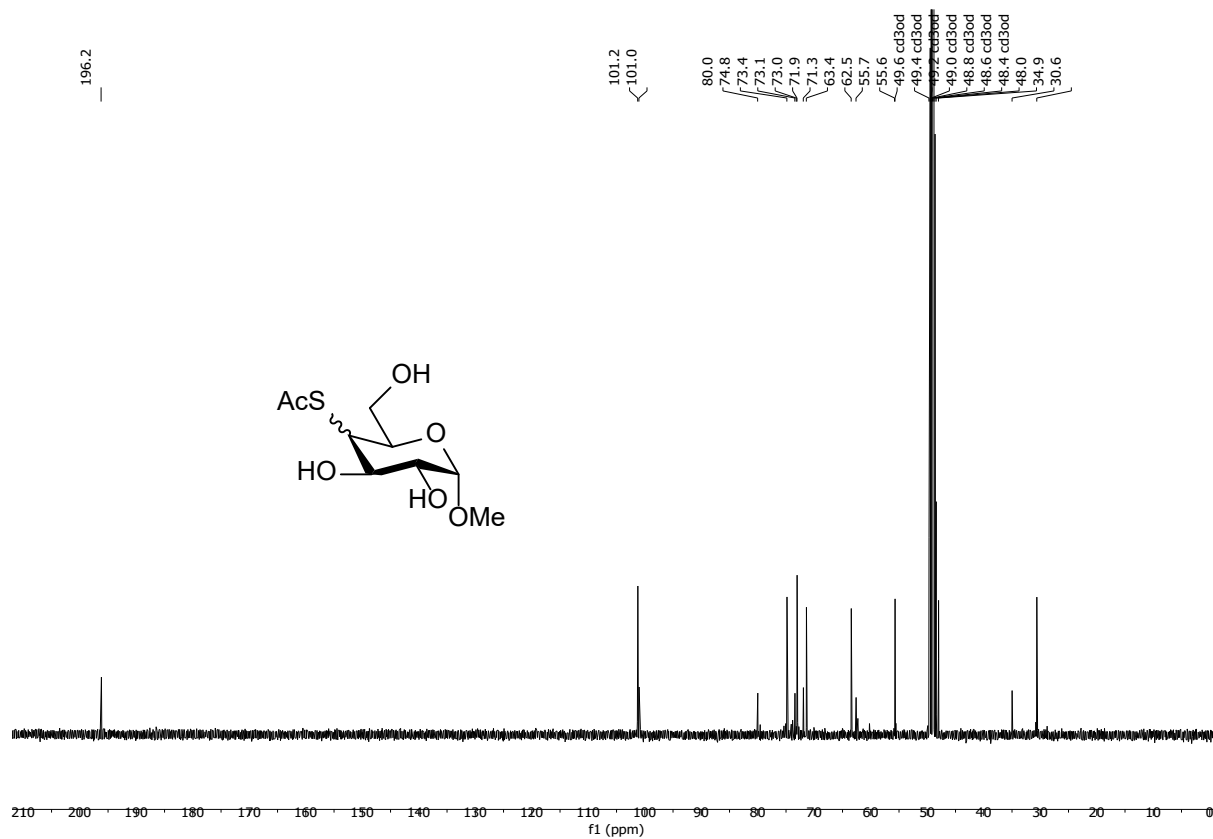

$^1\text{H}$ - $^1\text{H}$  COSY of compound **10**

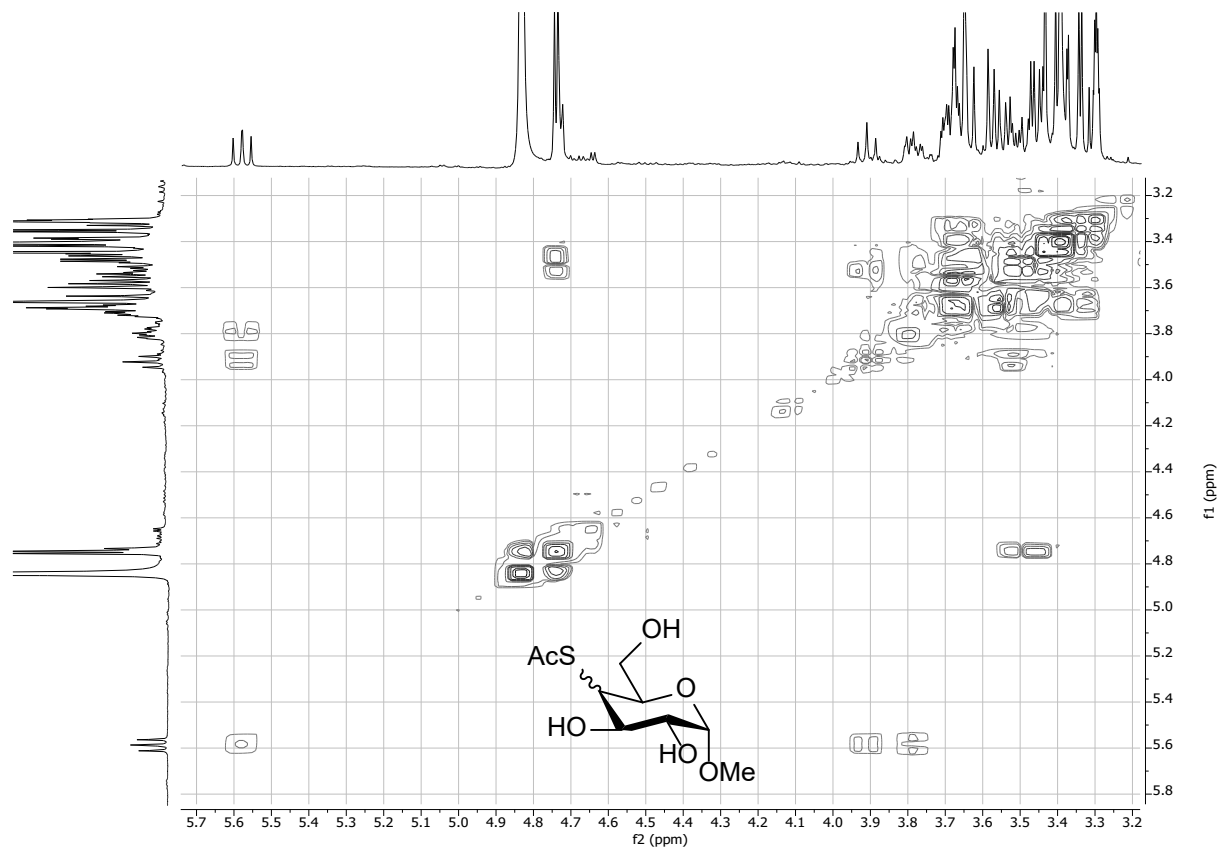

$^1\text{H}$ - $^{13}\text{C}$  HSQC of compound **10**

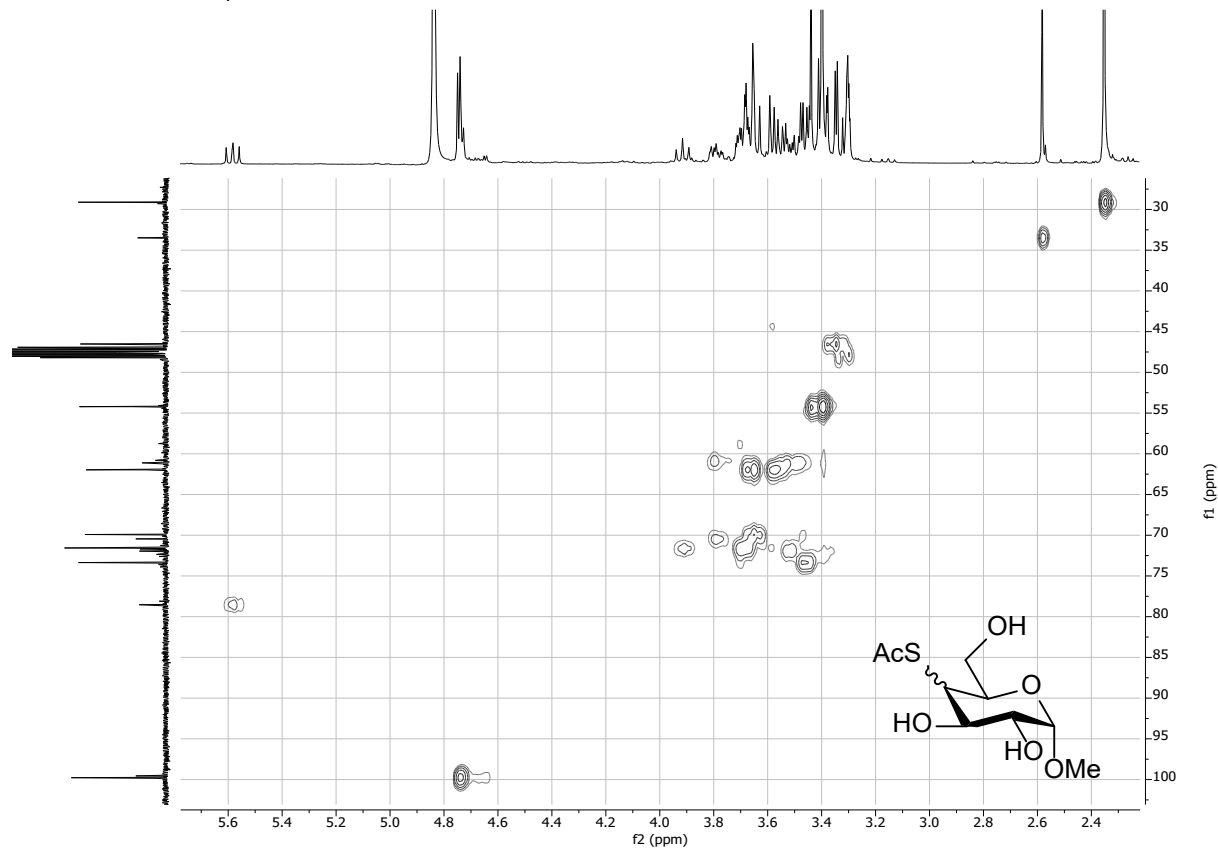

### Methyl 3-keto-3,4-deoxy- $\alpha$ -D-glucopyranoside (S10)

$^1\text{H}$  NMR, 400 MHz,  $\text{CD}_3\text{OD}$  of compound S10

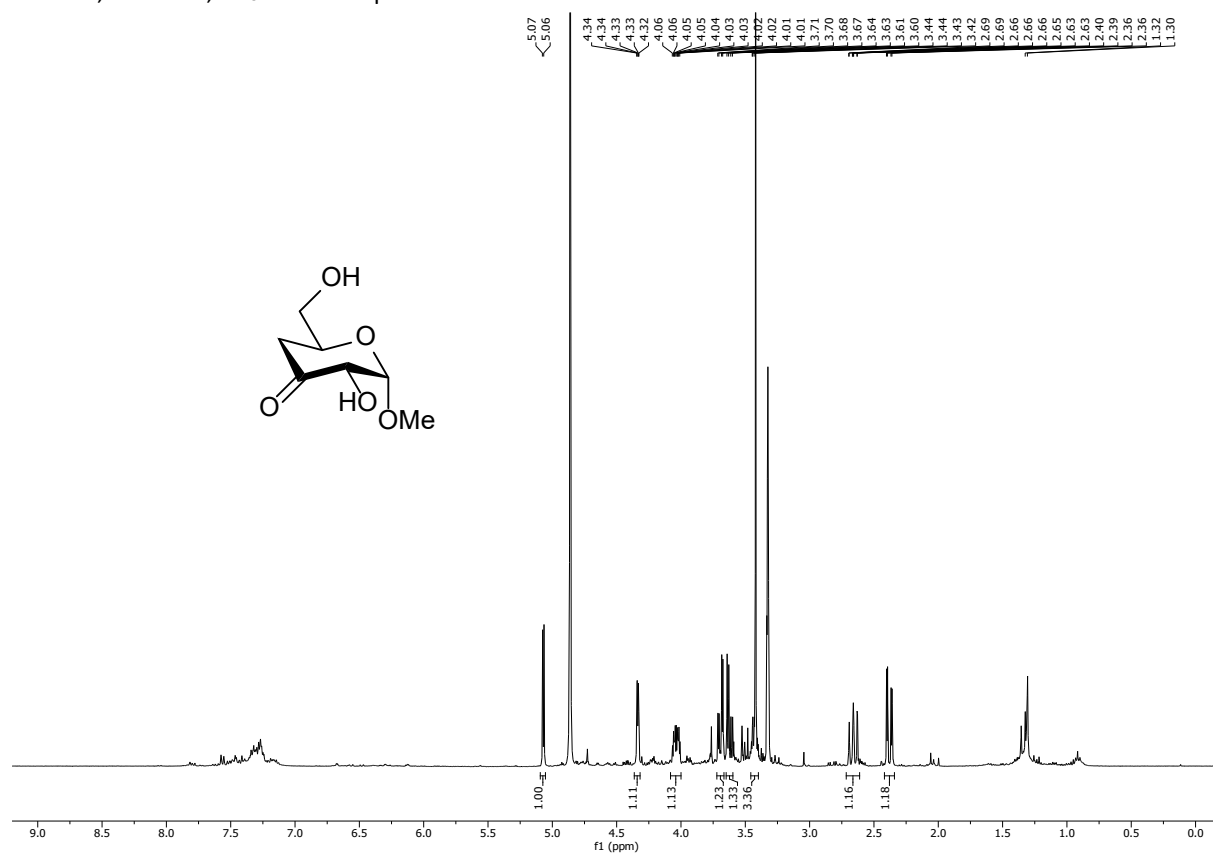

$^{13}\text{C}$  NMR, 101 MHz,  $\text{CD}_3\text{OD}$  of compound S10

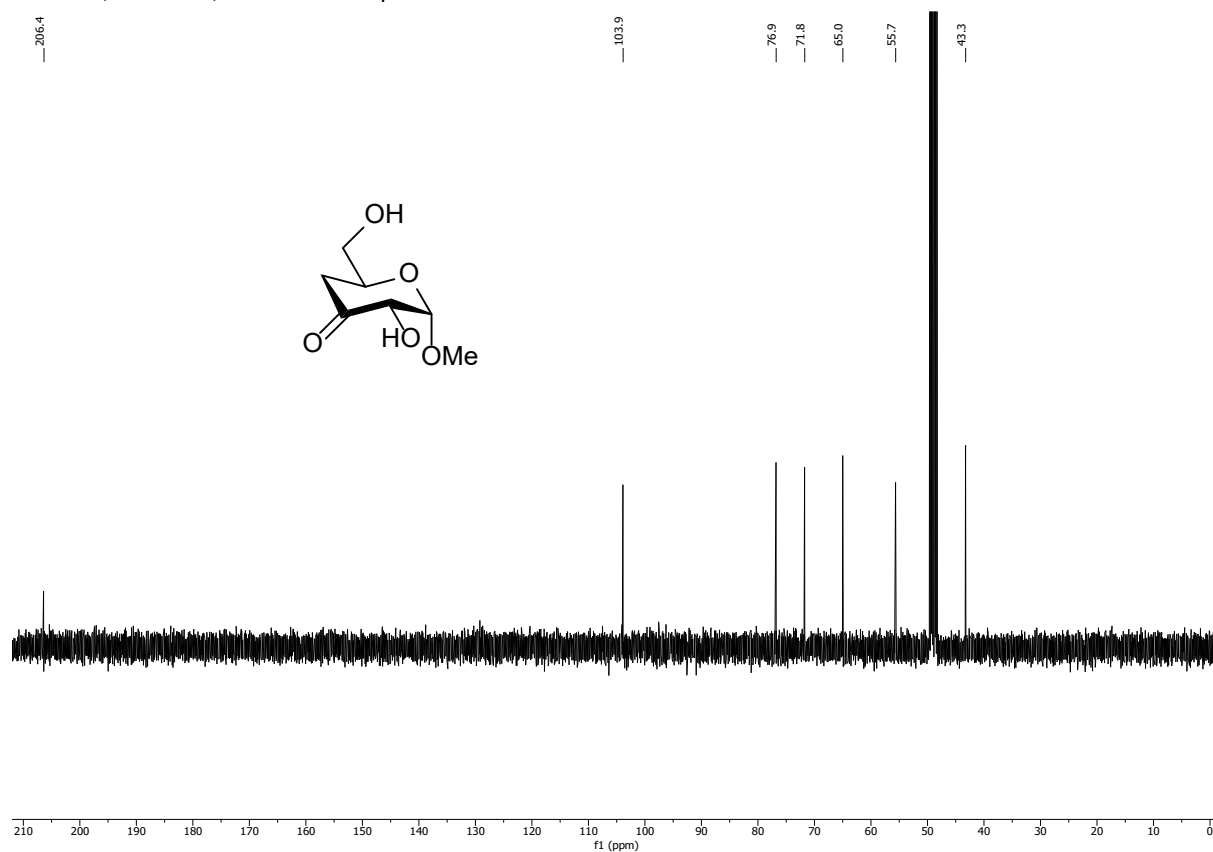

$^1\text{H}$ - $^1\text{H}$  COSY of compound **S10**

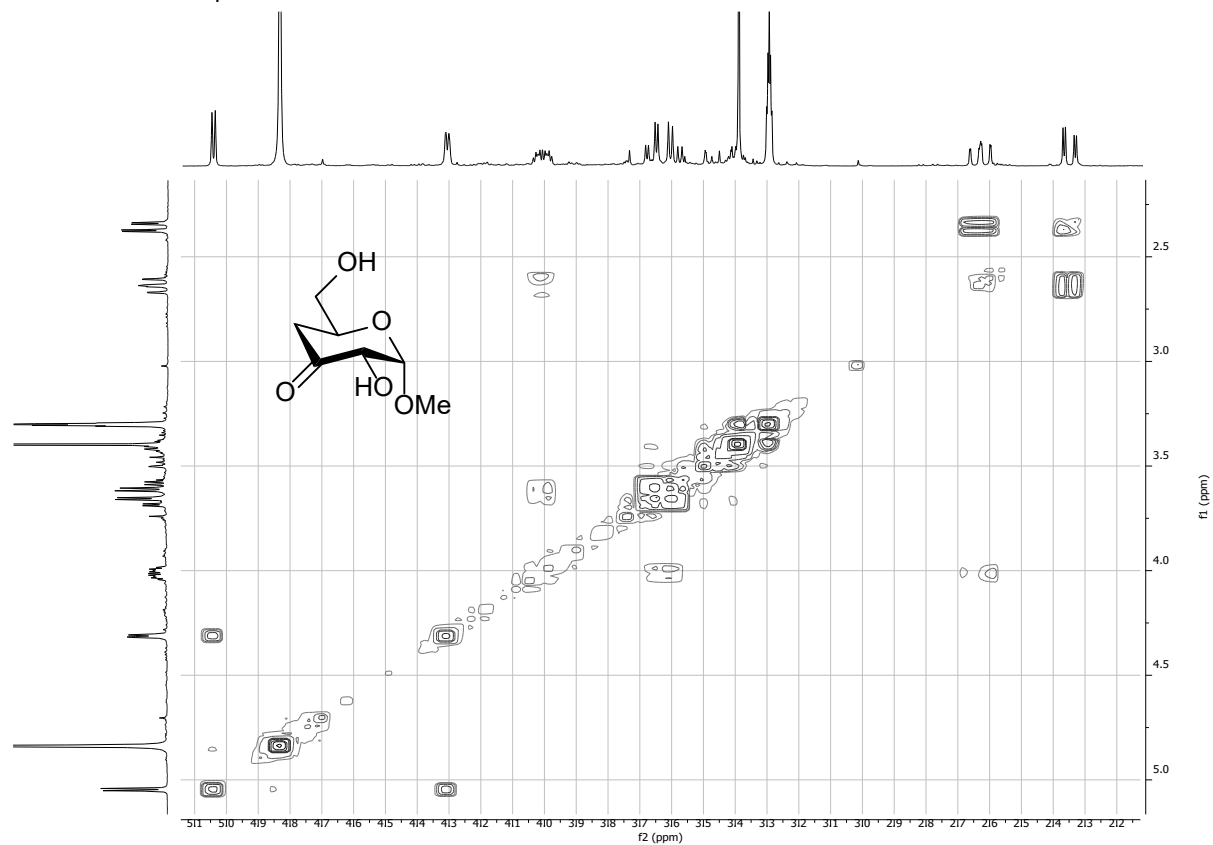

$^1\text{H}$ - $^{13}\text{C}$  HSQC of compound **S10**

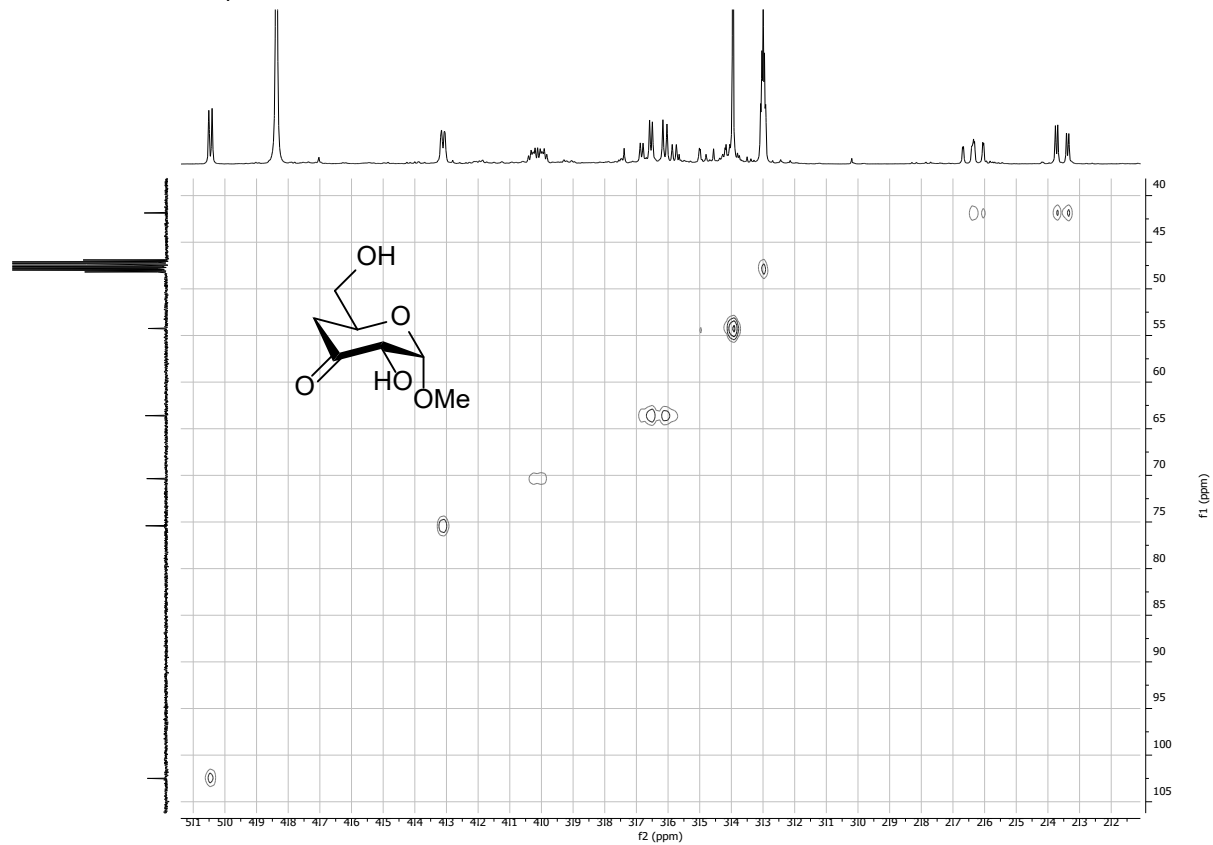

### NMR spectra of maltose derivative

#### 4-tert-butylbenzyl-3-S-benzyl-3-deoxy- $\alpha$ -D-maltoside (**12**)

Equatorial:

$^1\text{H}$  NMR, 400 MHz,  $\text{CD}_3\text{OD}$  of compound **12**

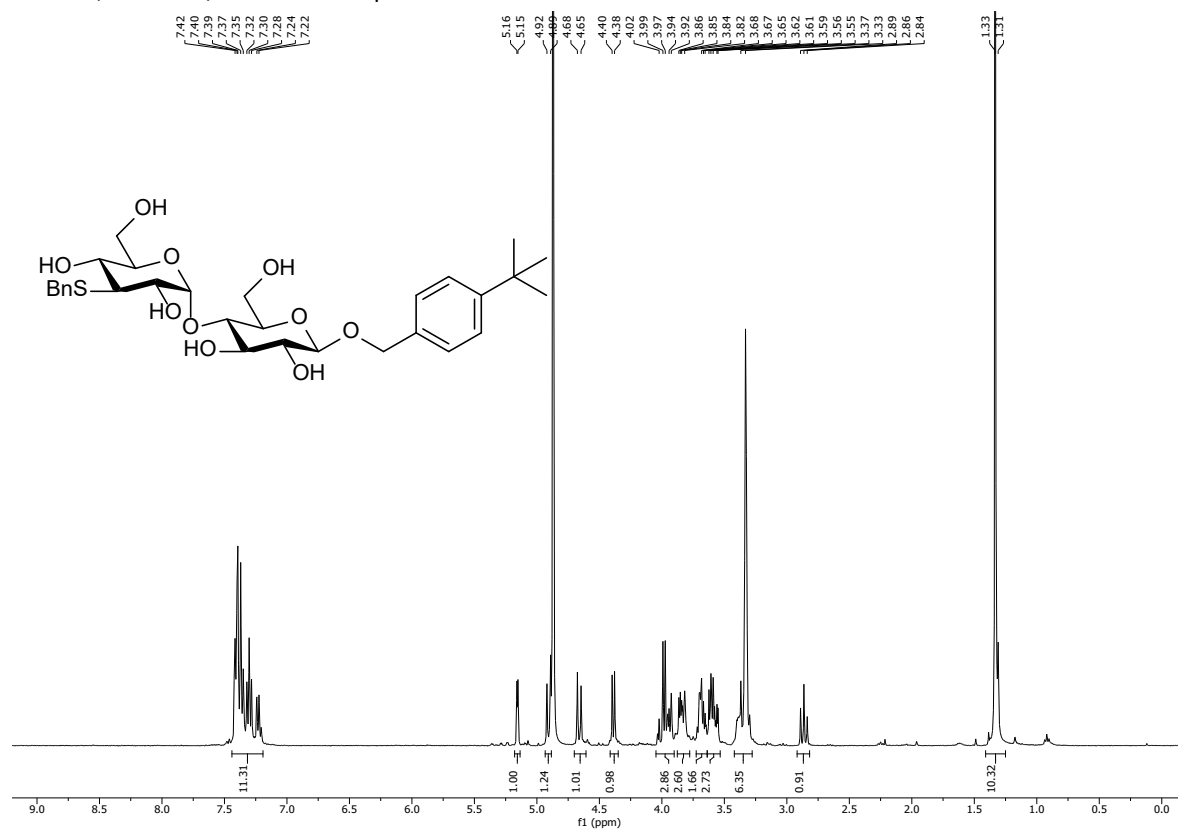

$^{13}\text{C}$  NMR, 101 MHz,  $\text{CD}_3\text{OD}$  of compound **12**

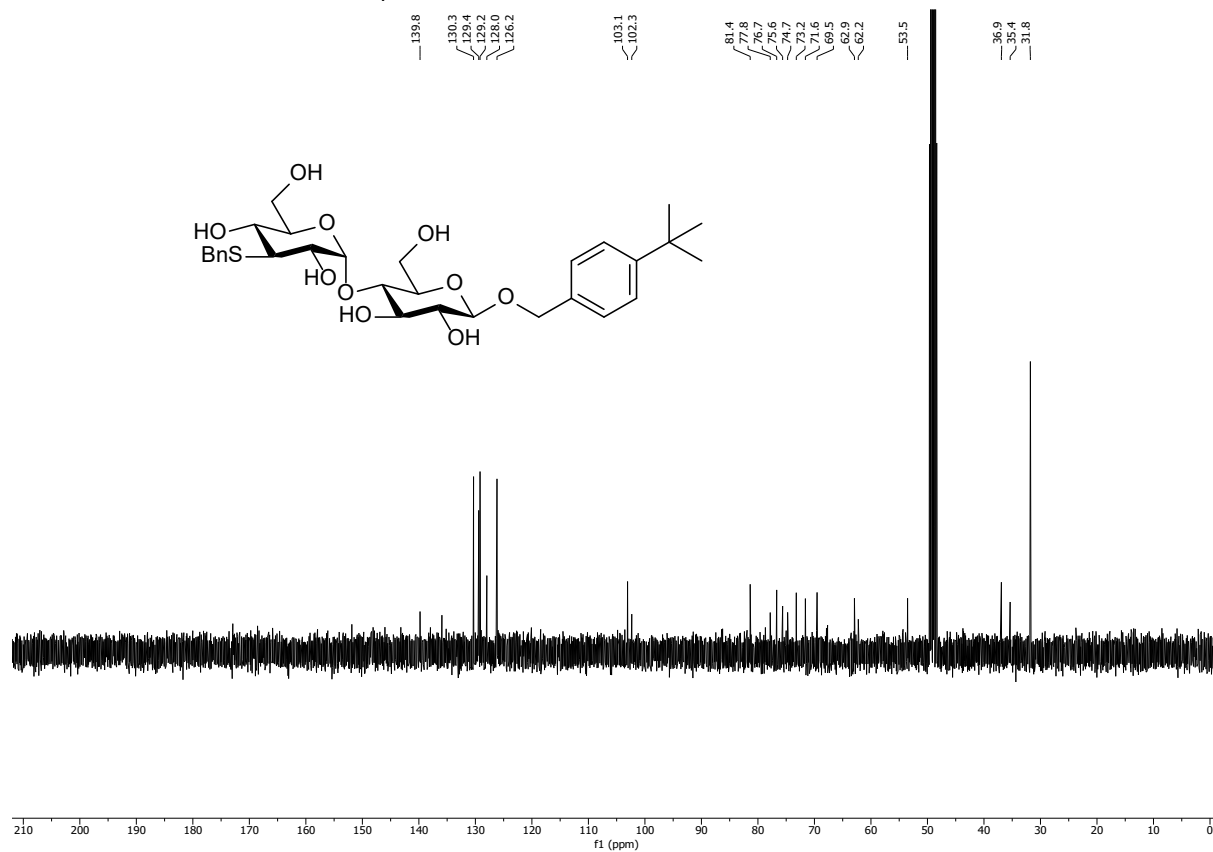

$^1\text{H}$ - $^1\text{H}$  COSY of compound **12**

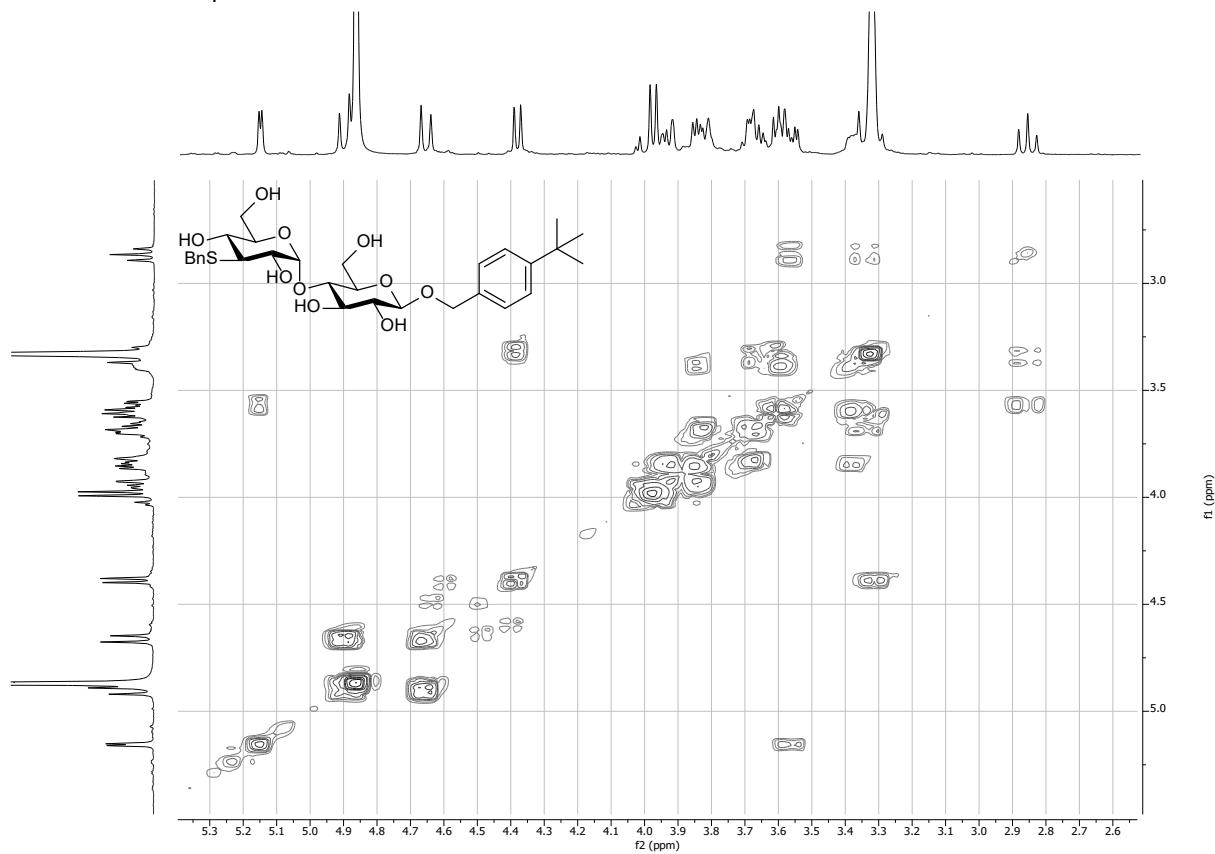

$^1\text{H}$ - $^{13}\text{C}$  HSQC of compound **12**

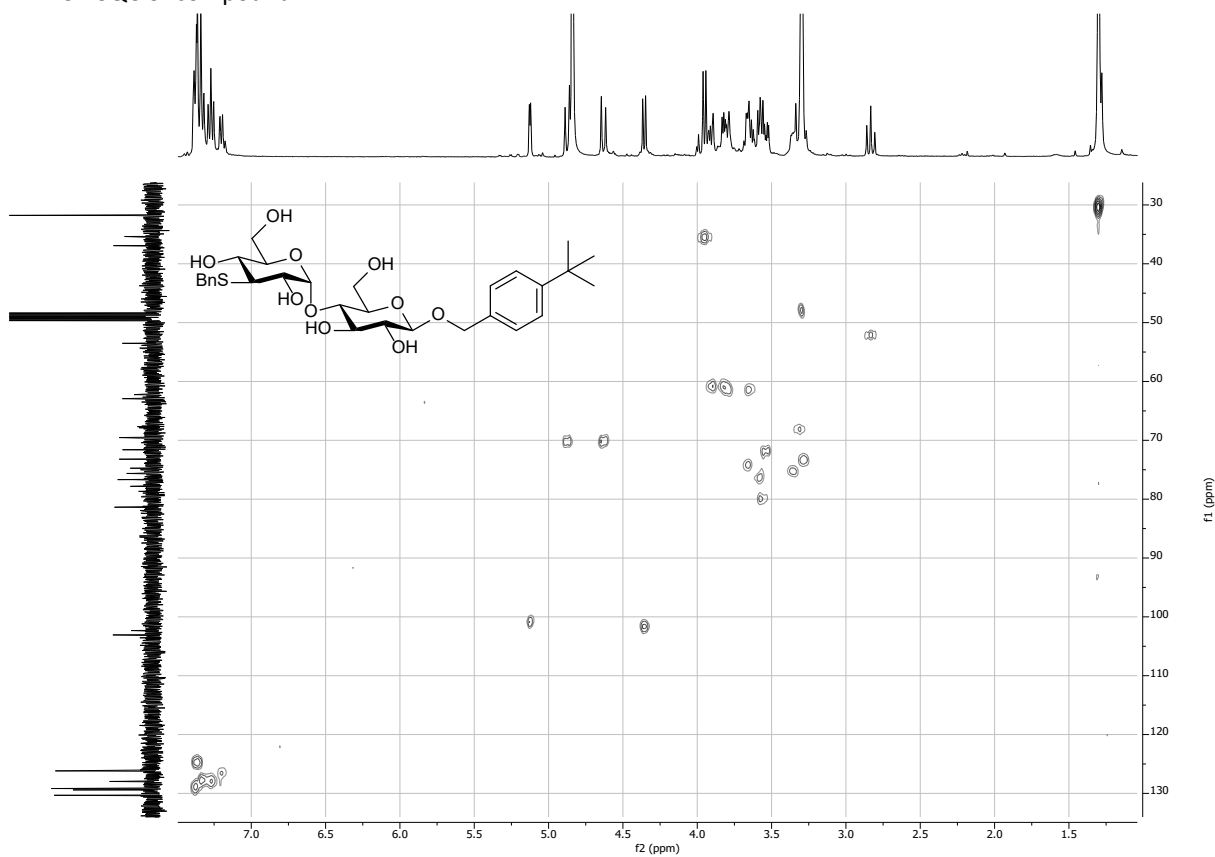



Axial:

$^1\text{H}$  NMR, 400 MHz,  $\text{CD}_3\text{OD}$  of compound **12**

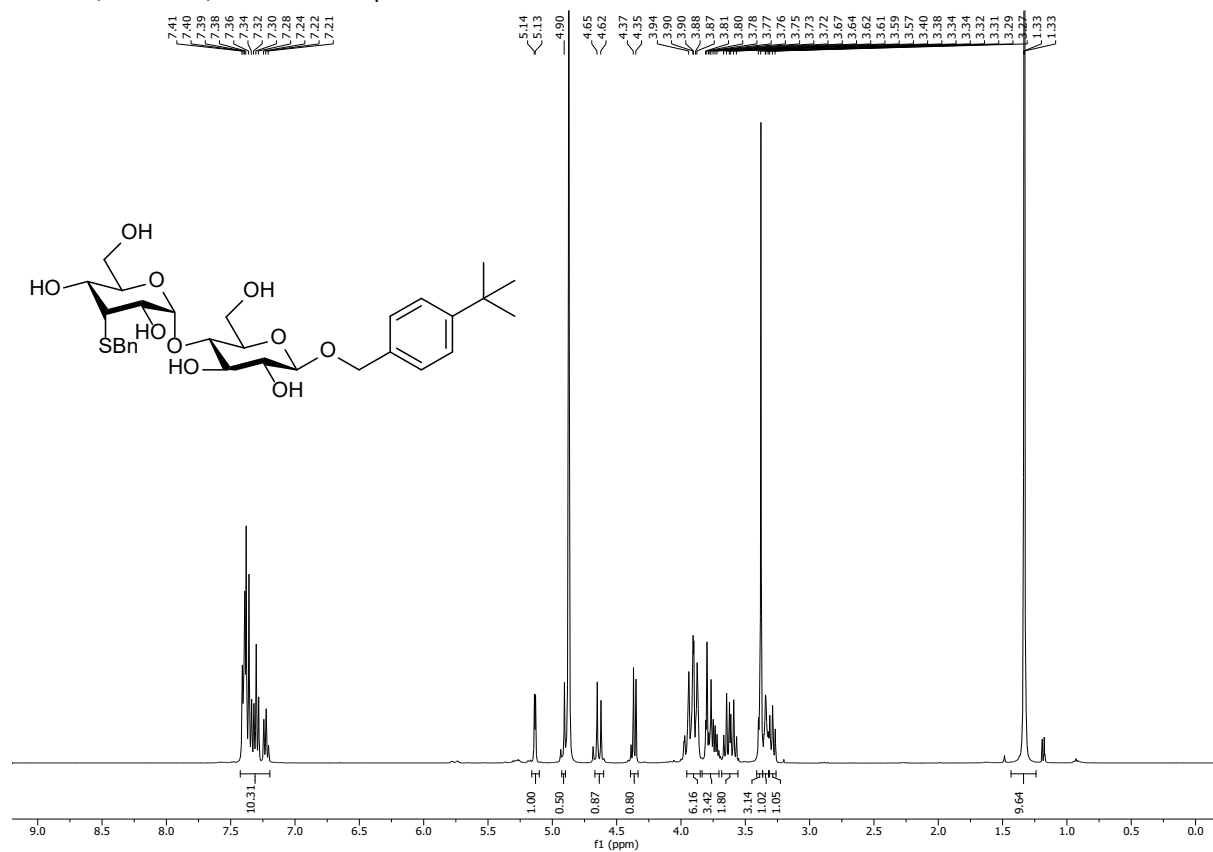

$^{13}\text{C}$  NMR, 101 MHz,  $\text{CD}_3\text{OD}$  of compound **12**

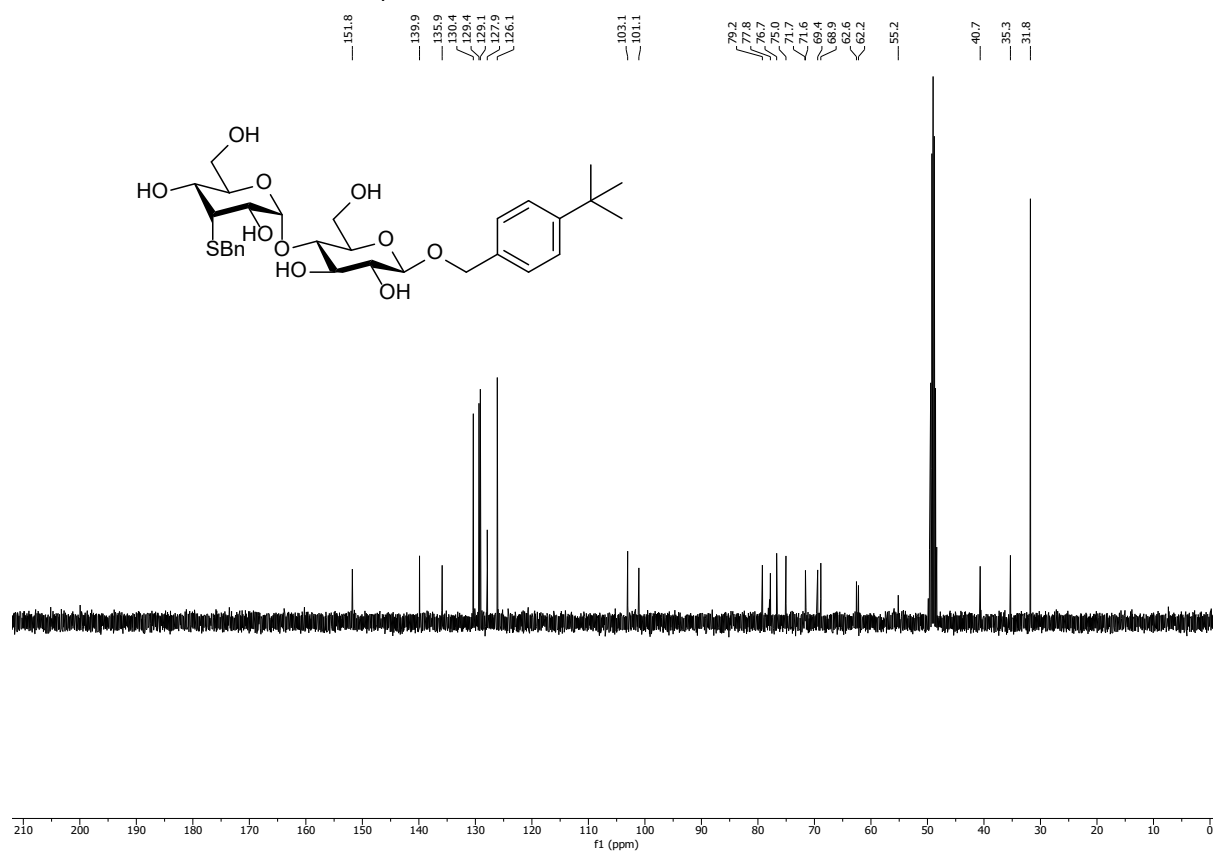

$^1\text{H}$ - $^1\text{H}$  COSY of compound **12**

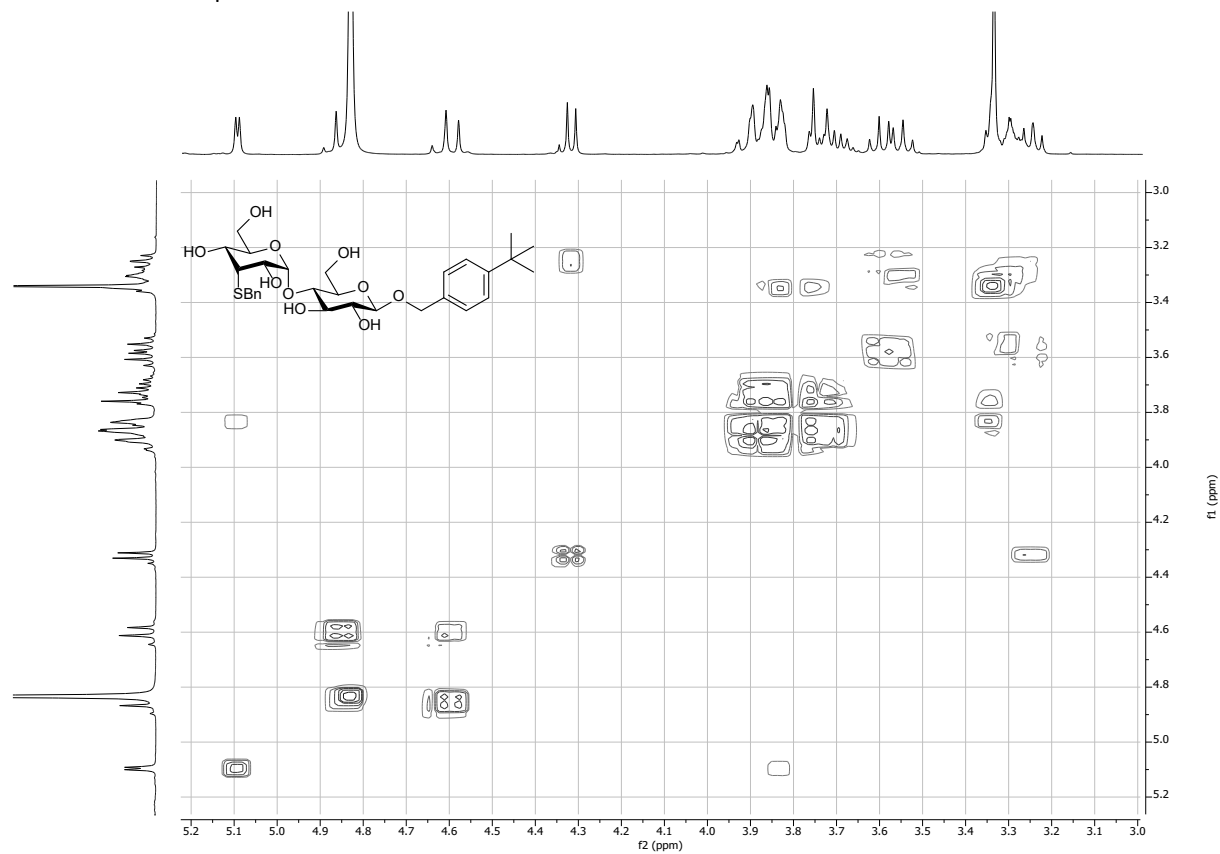

$^1\text{H}$ - $^{13}\text{C}$  HSQC of compound **12**

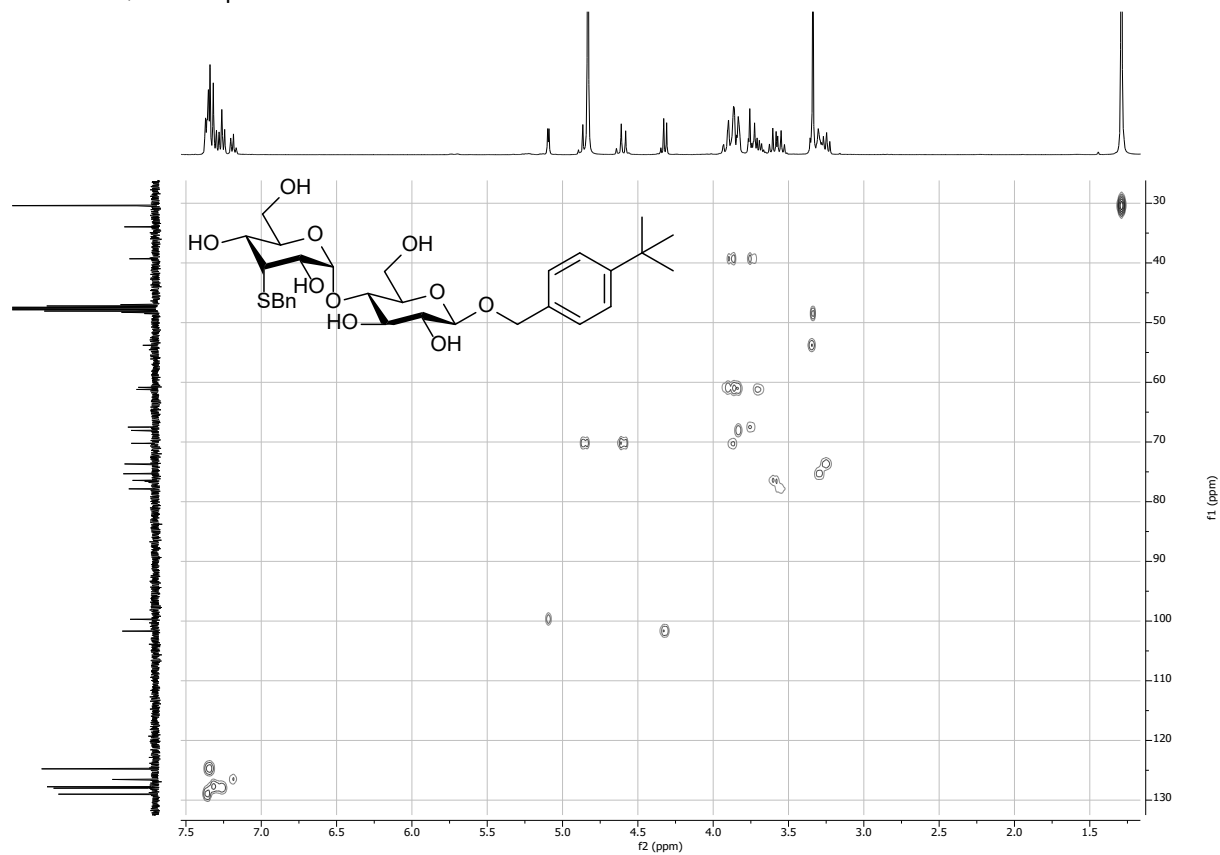

**NMR spectra of S13 and S14**

**Methyl-2,4,6-O-acetyl-3-(trityl)hydrazone)- $\alpha$ -D-glucopyranoside (S13)**

$^1\text{H}$  NMR, 400 MHz,  $\text{CDCl}_3$  of compound S13

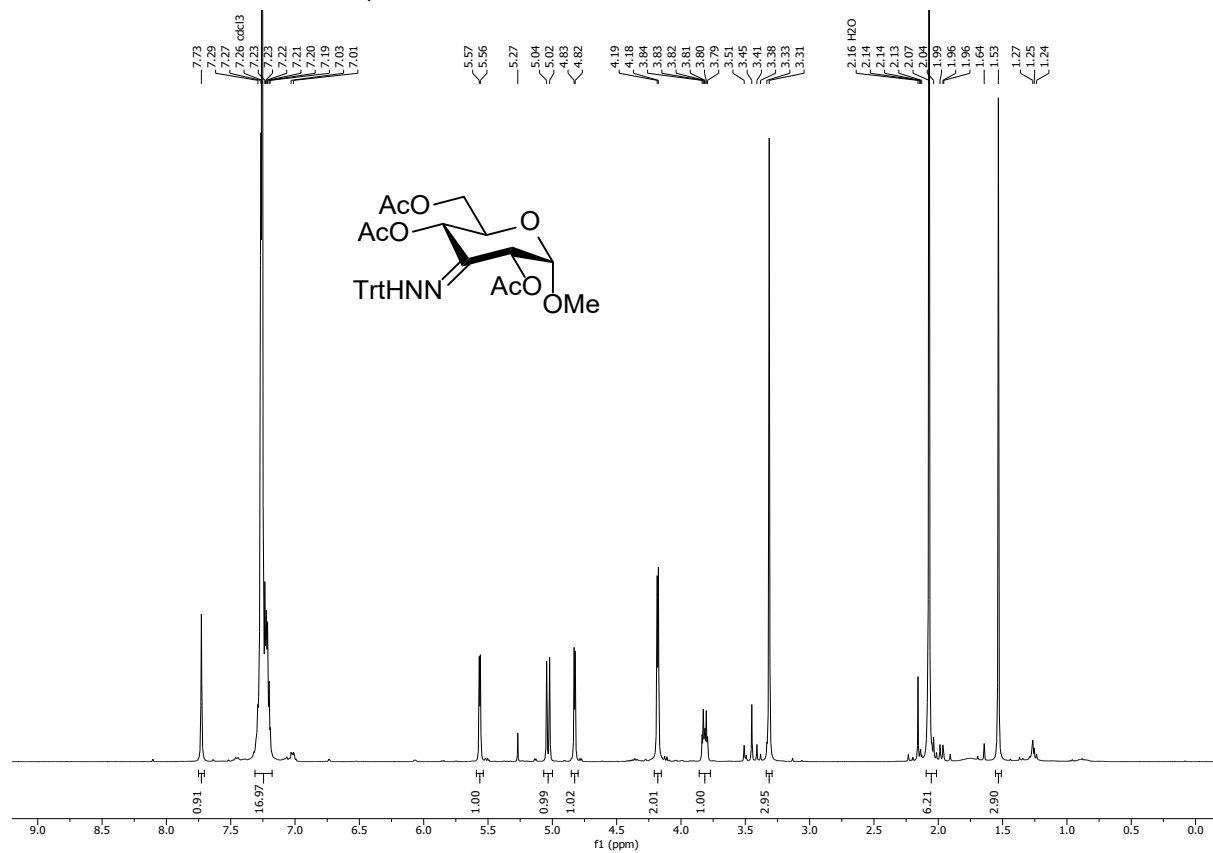

$^{13}\text{C}$  NMR, 101 MHz,  $\text{CDCl}_3$  of compound S13

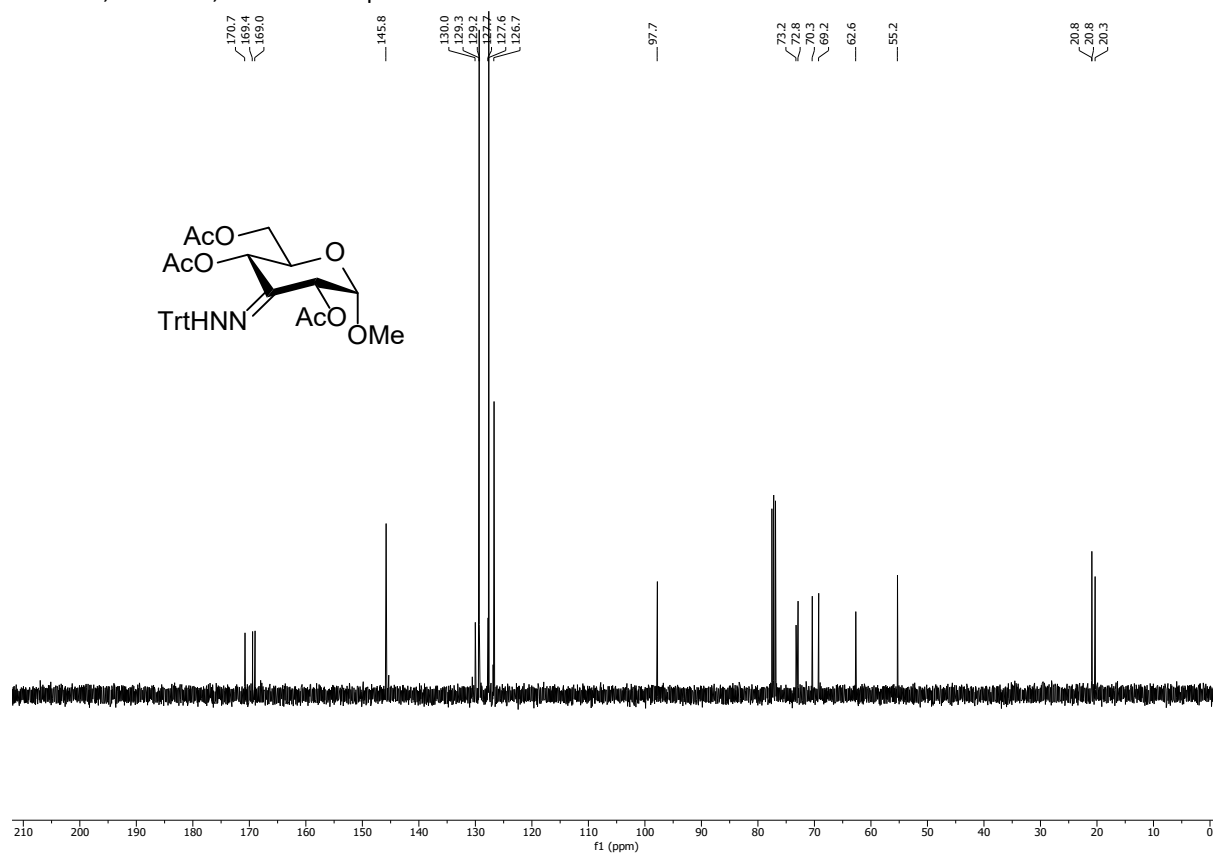

$^1\text{H}$ - $^1\text{H}$  COSY of compound **S13**

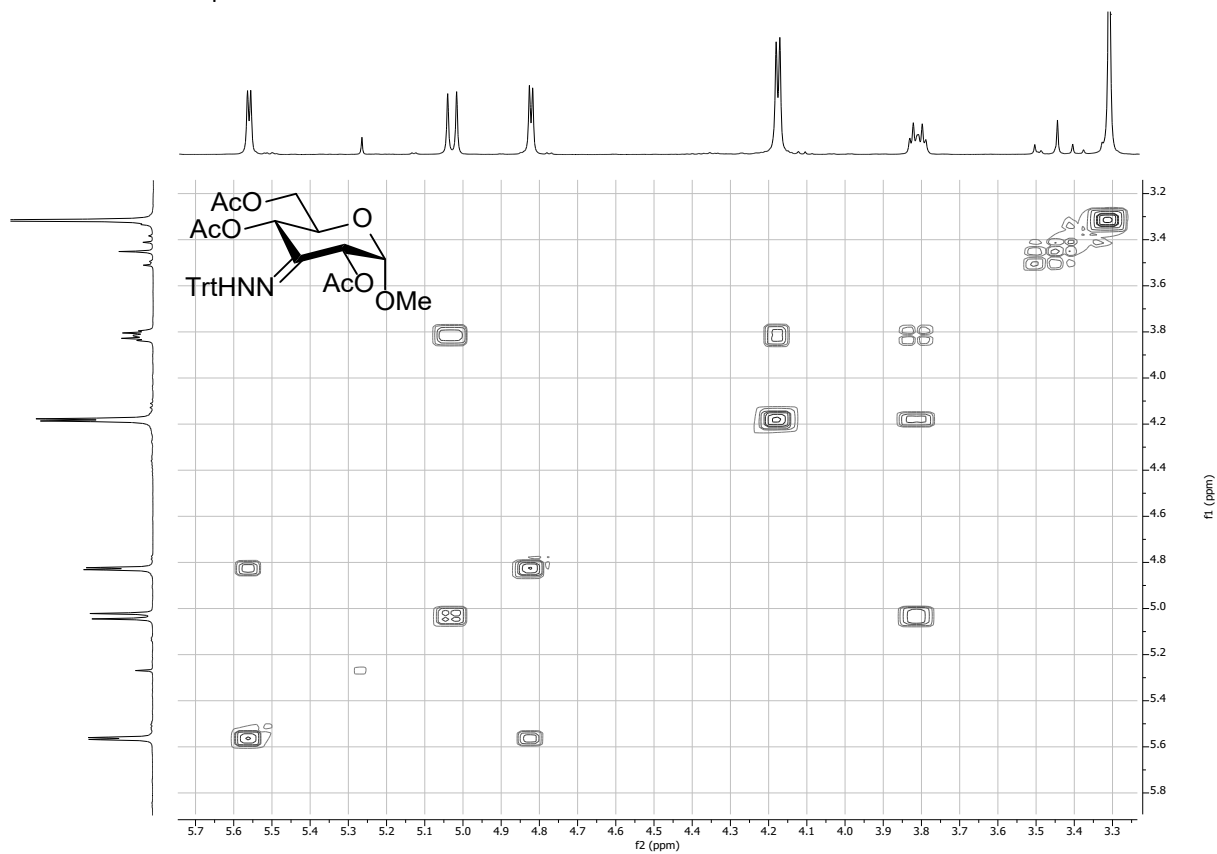

$^1\text{H}$ - $^{13}\text{C}$  HSQC of compound **S13**

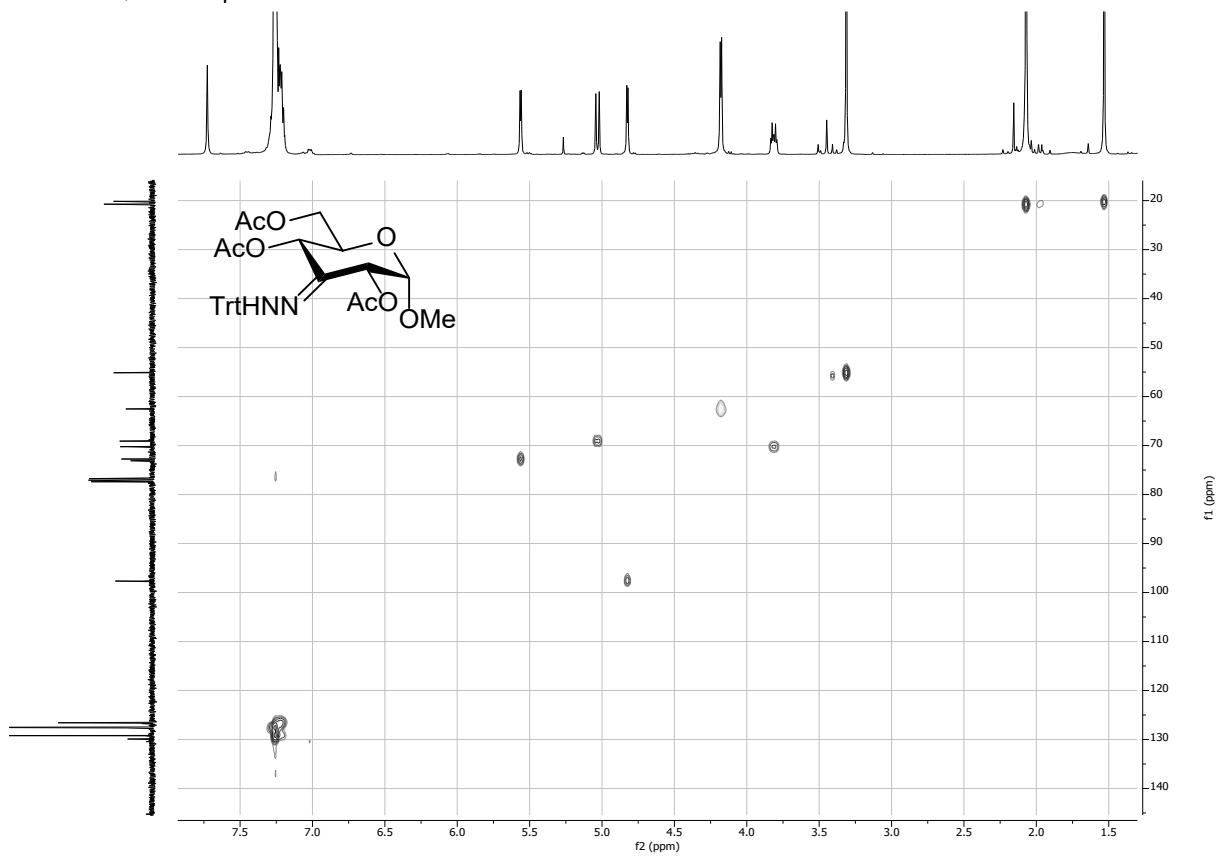

# Methyl 2,4,6-tri-O-acetyl-3-chloro- $\alpha$ -D-allo/glucofuranoside (S14)

Equatorial:

$^1\text{H}$  NMR, 400 MHz,  $\text{CDCl}_3$  of compound S14

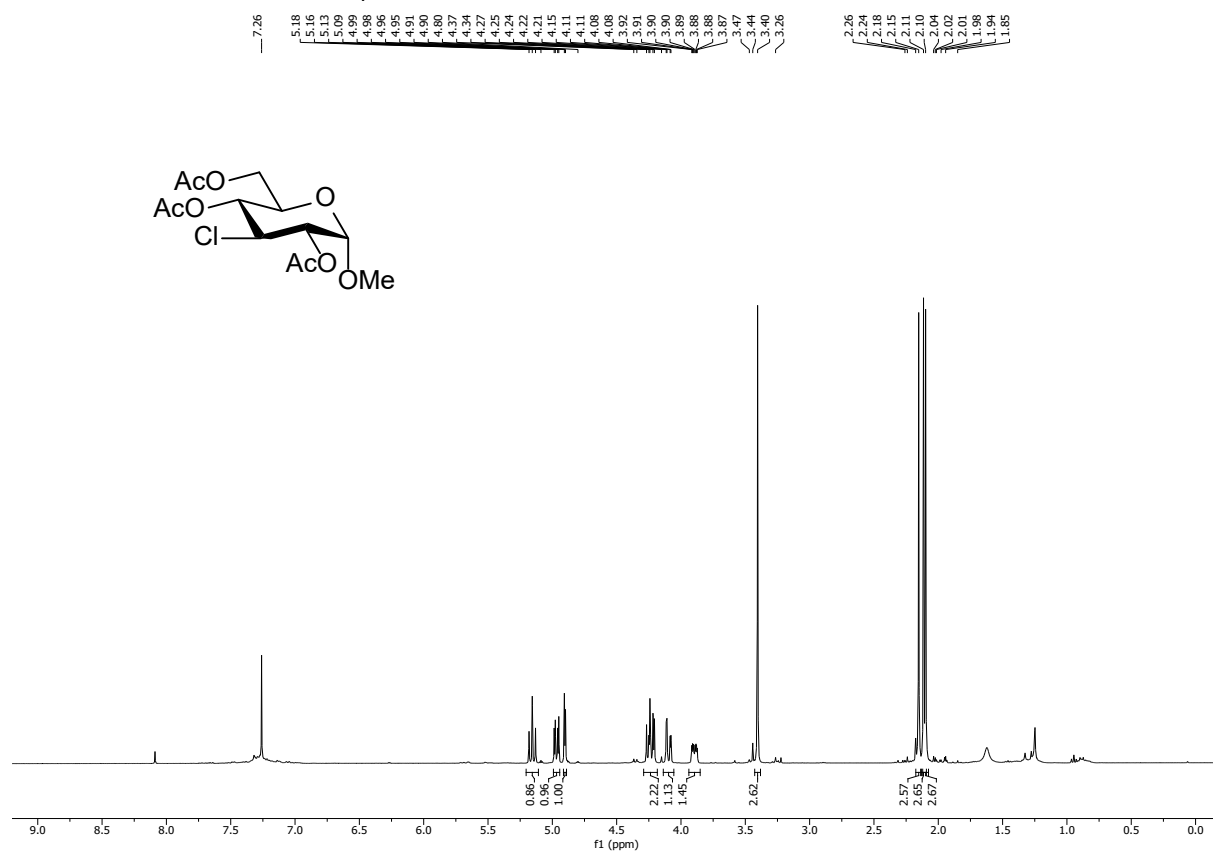

$^{13}\text{C}$  NMR, 101 MHz,  $\text{CDCl}_3$  of compound S14

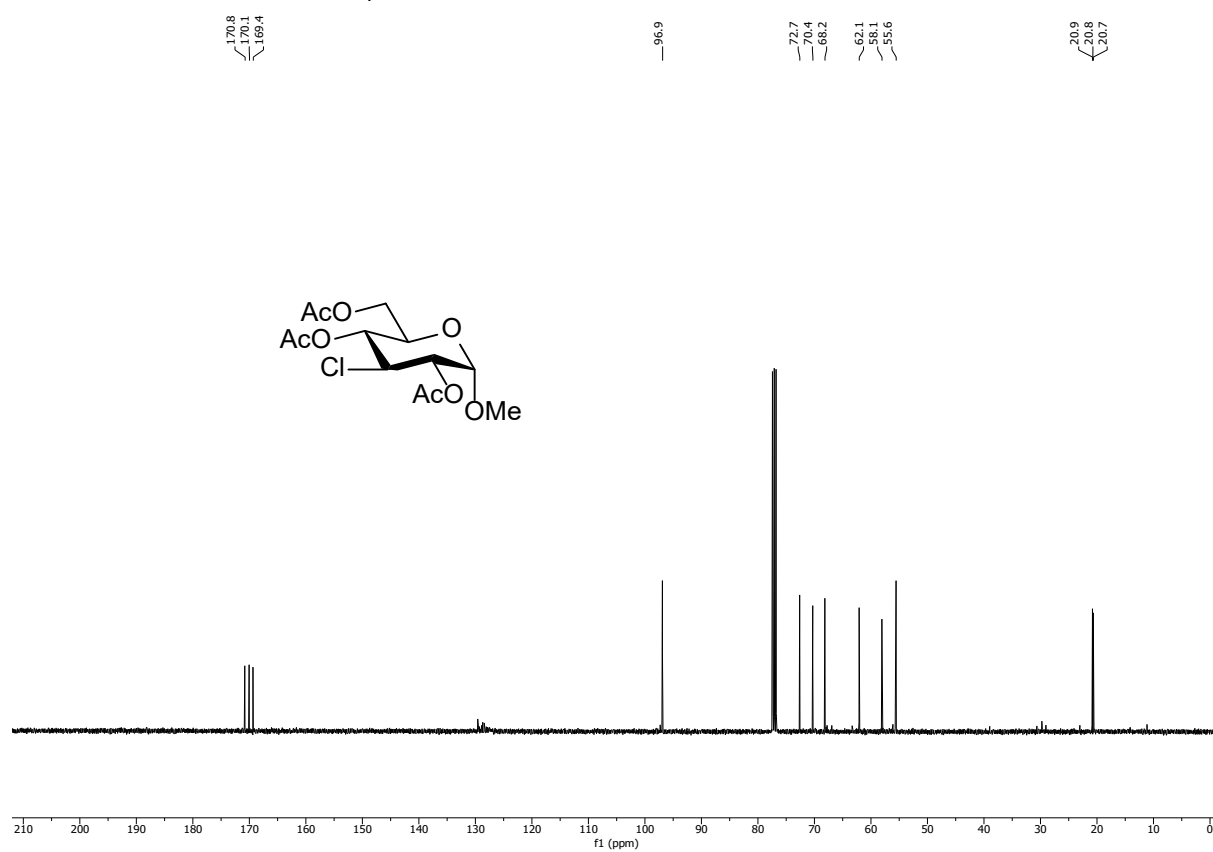

$^1\text{H}$ - $^1\text{H}$  COSY of compound **S14**

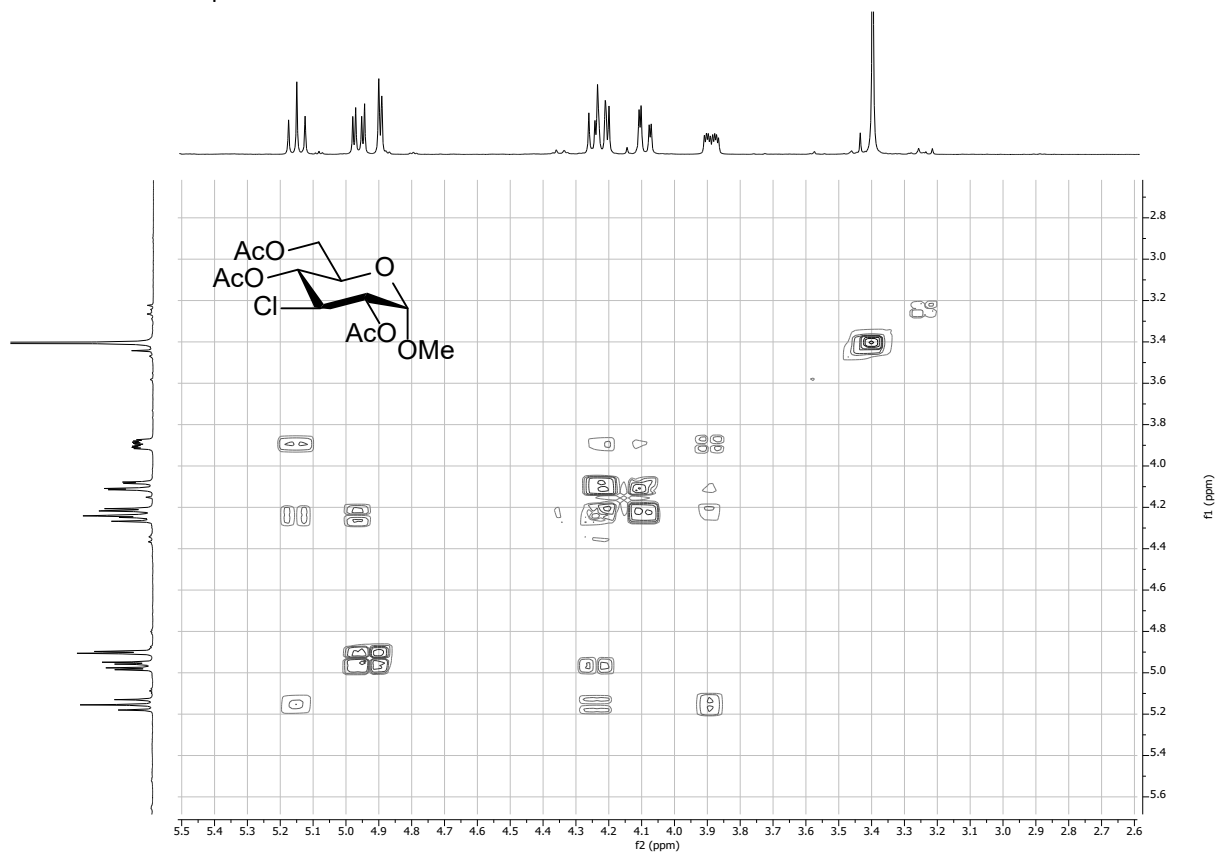

$^1\text{H}$ - $^{13}\text{C}$  HSQC of compound **S14**

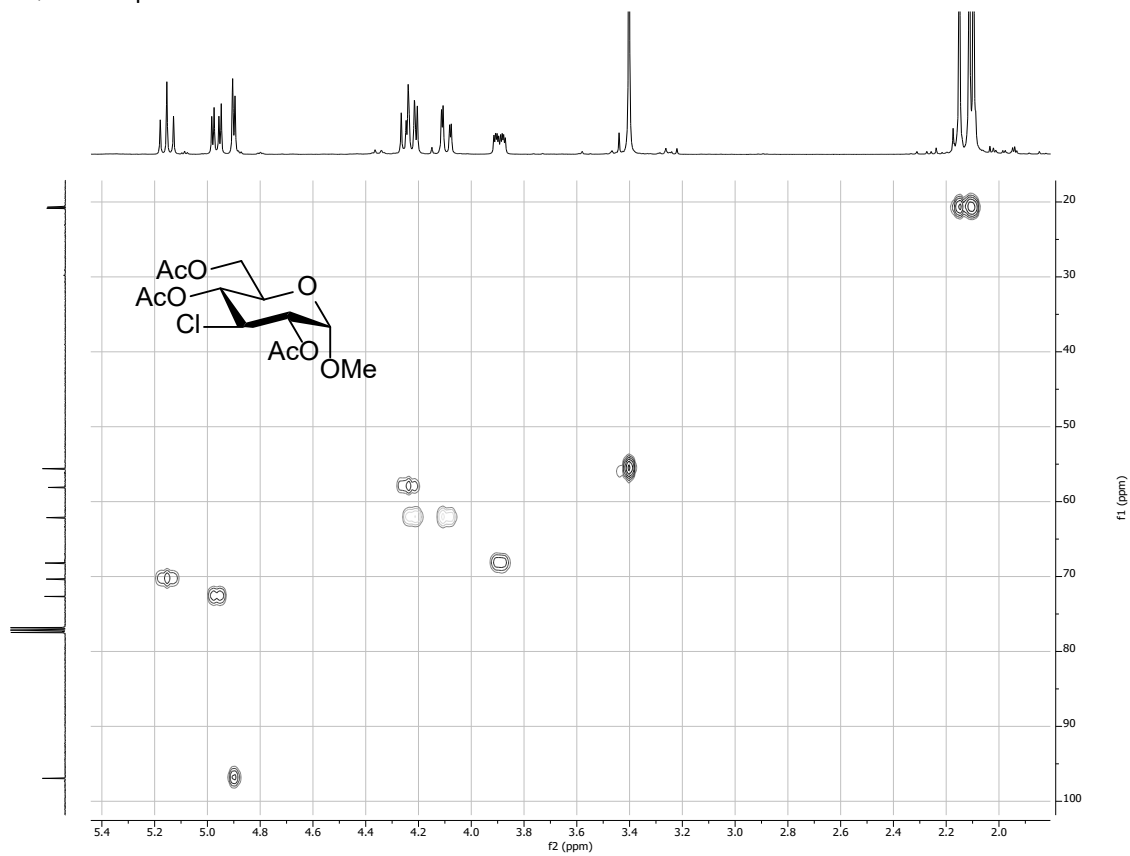

Axial:

$^1\text{H}$  NMR, 400 MHz,  $\text{CDCl}_3$  of compound **S14**

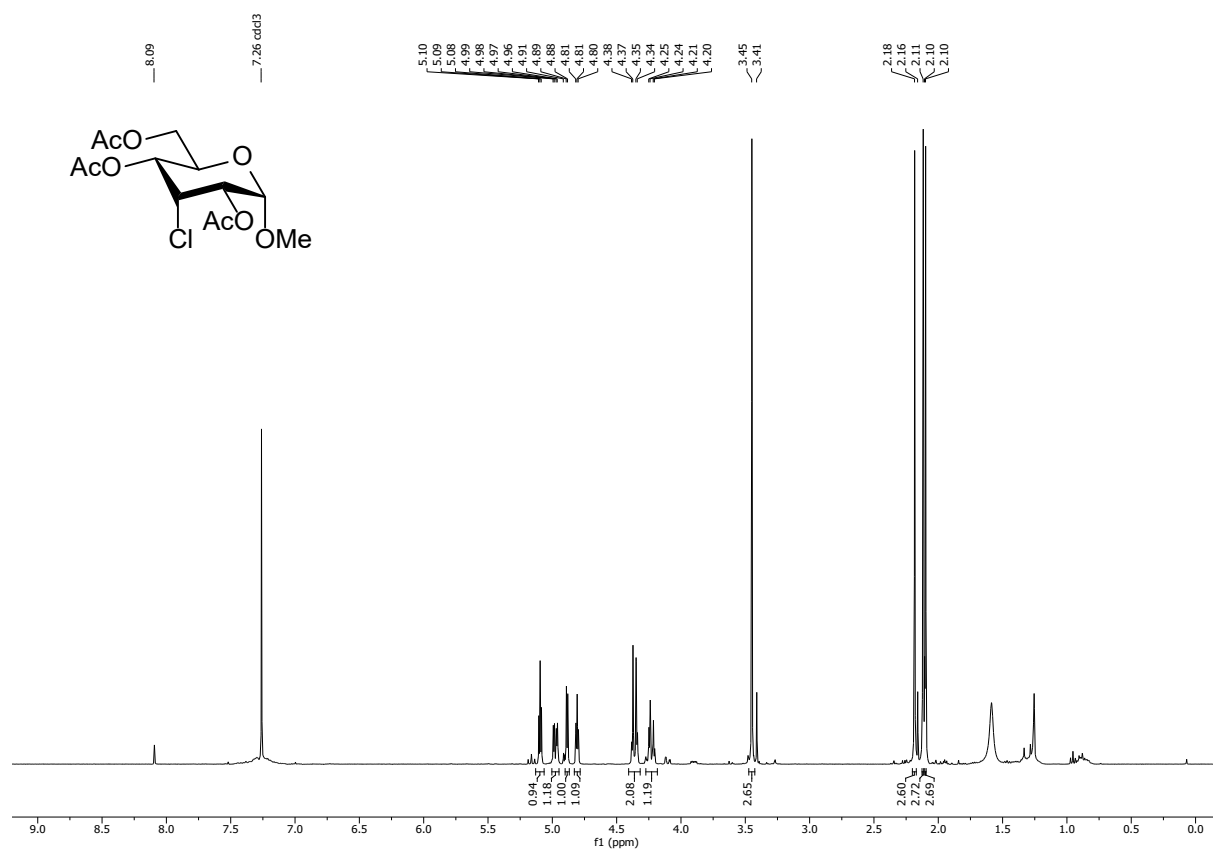

$^{13}\text{C}$  NMR, 101 MHz,  $\text{CDCl}_3$  of compound **S14**

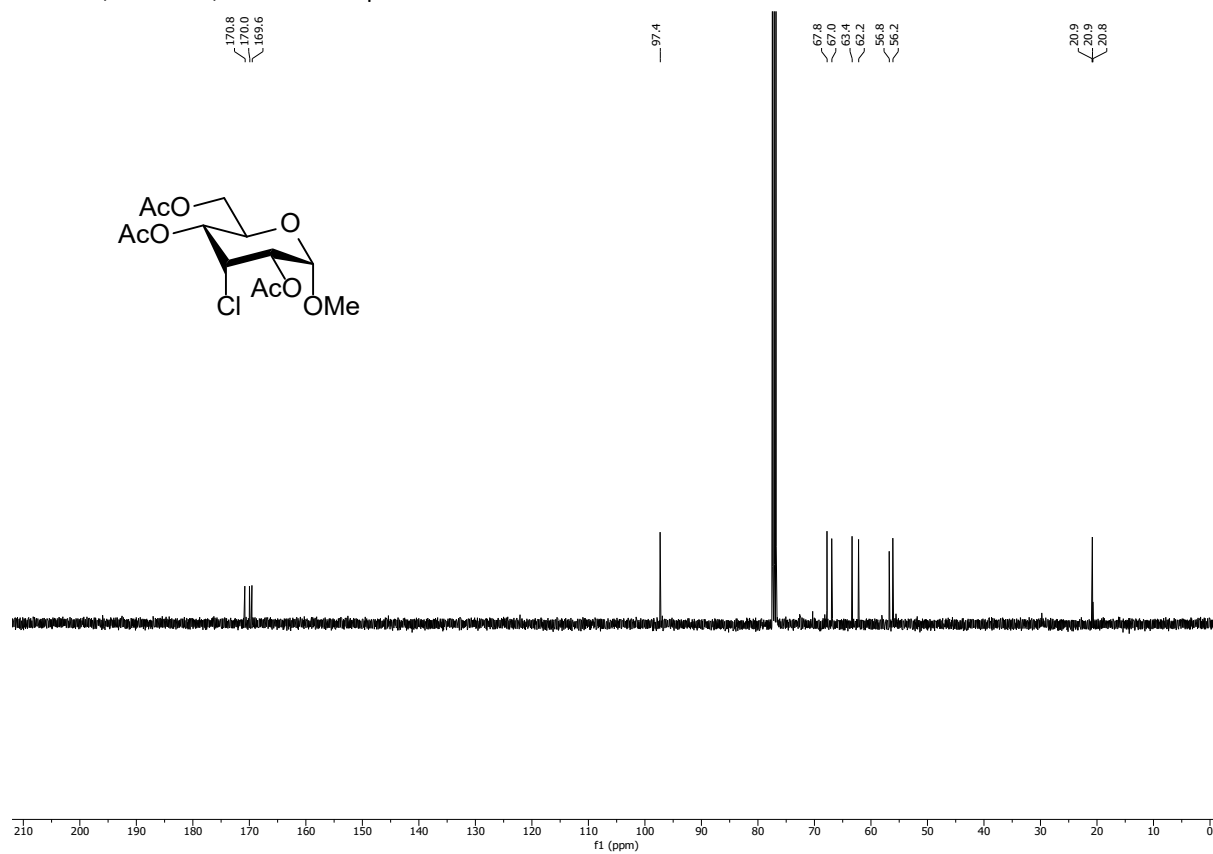

<sup>1</sup>H-<sup>1</sup>H COSY of compound **S14**

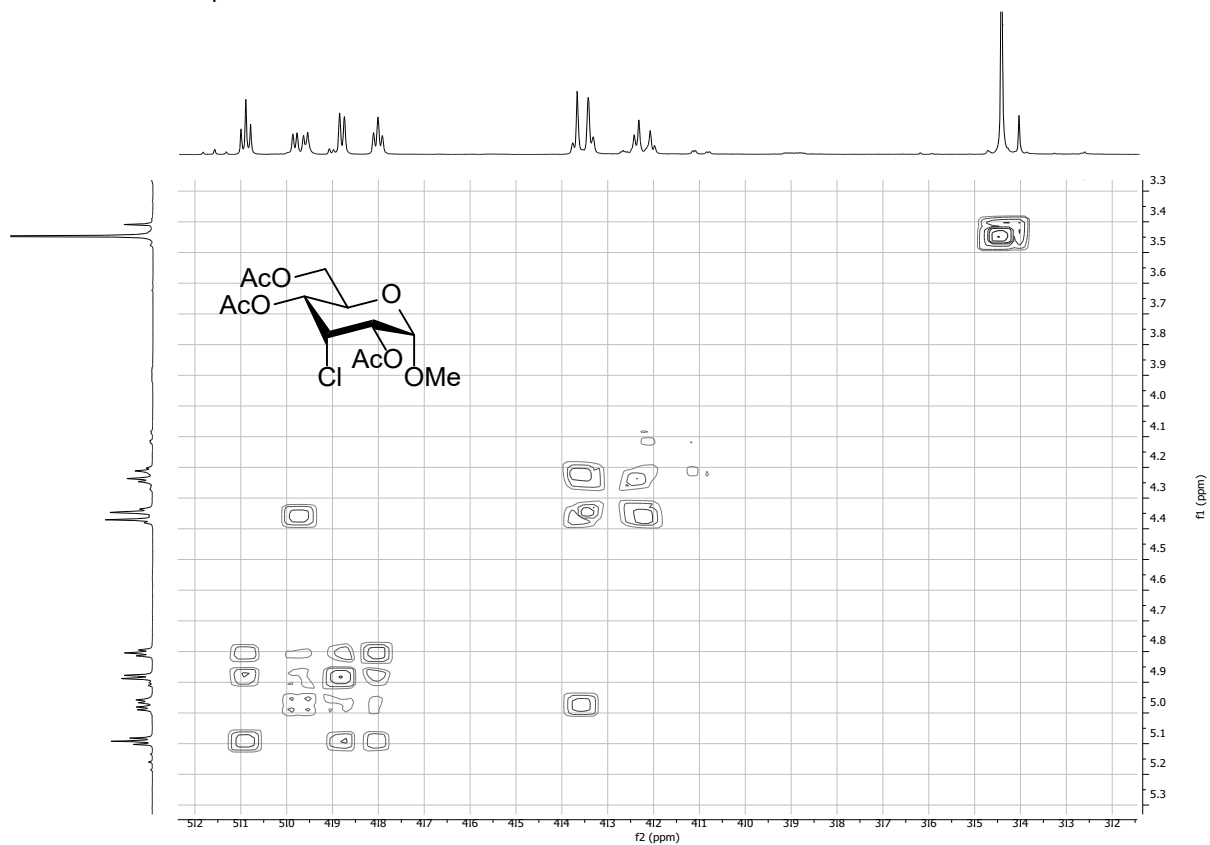

<sup>1</sup>H-<sup>13</sup>C HSQC of compound **S14**

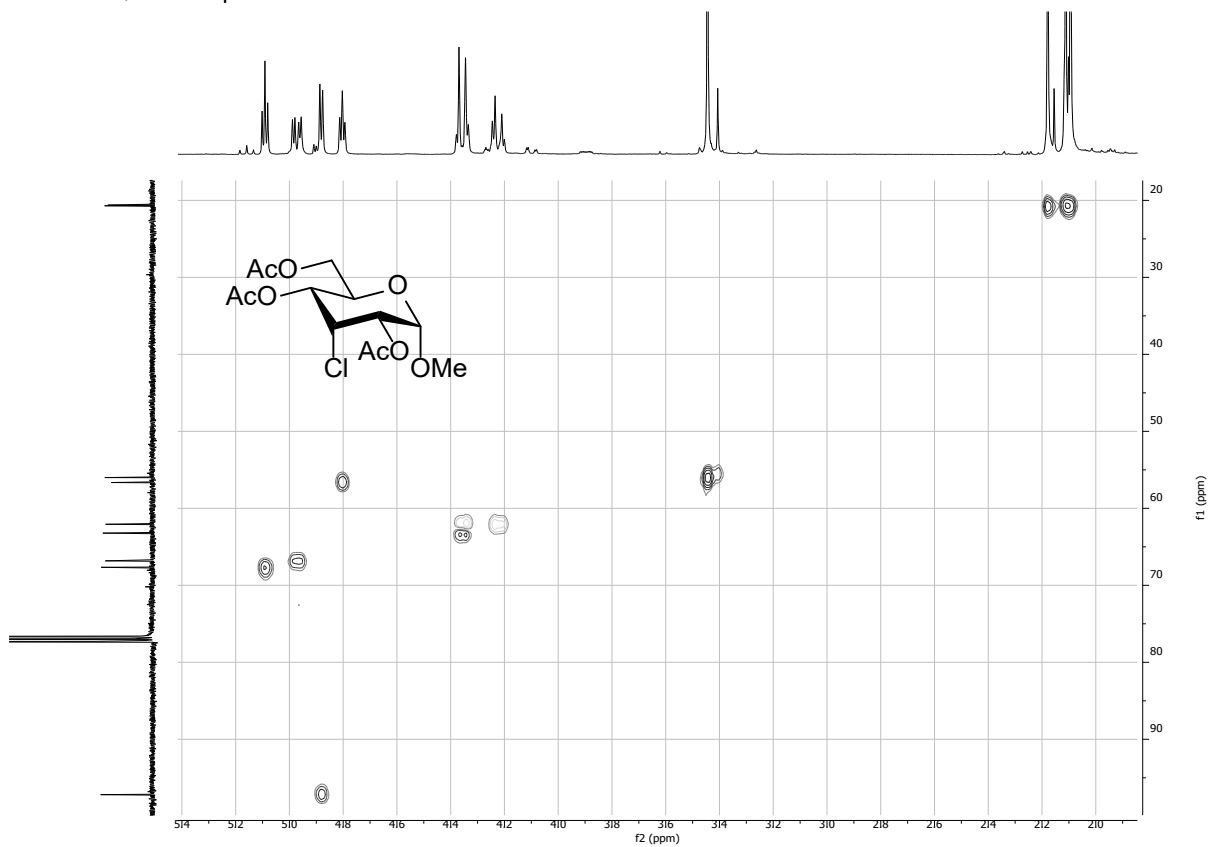



**NMR spectra of  $\beta$ -glucose derivative and sideproduct S15**  
**Methyl 3-S-benzyl-3-deoxy- $\beta$ -D-allo/glucoopyranoside (14) and sideproduct (S15)**

$^1\text{H}$  NMR, 400 MHz,  $\text{CD}_3\text{OD}$  of compounds 14 and S15

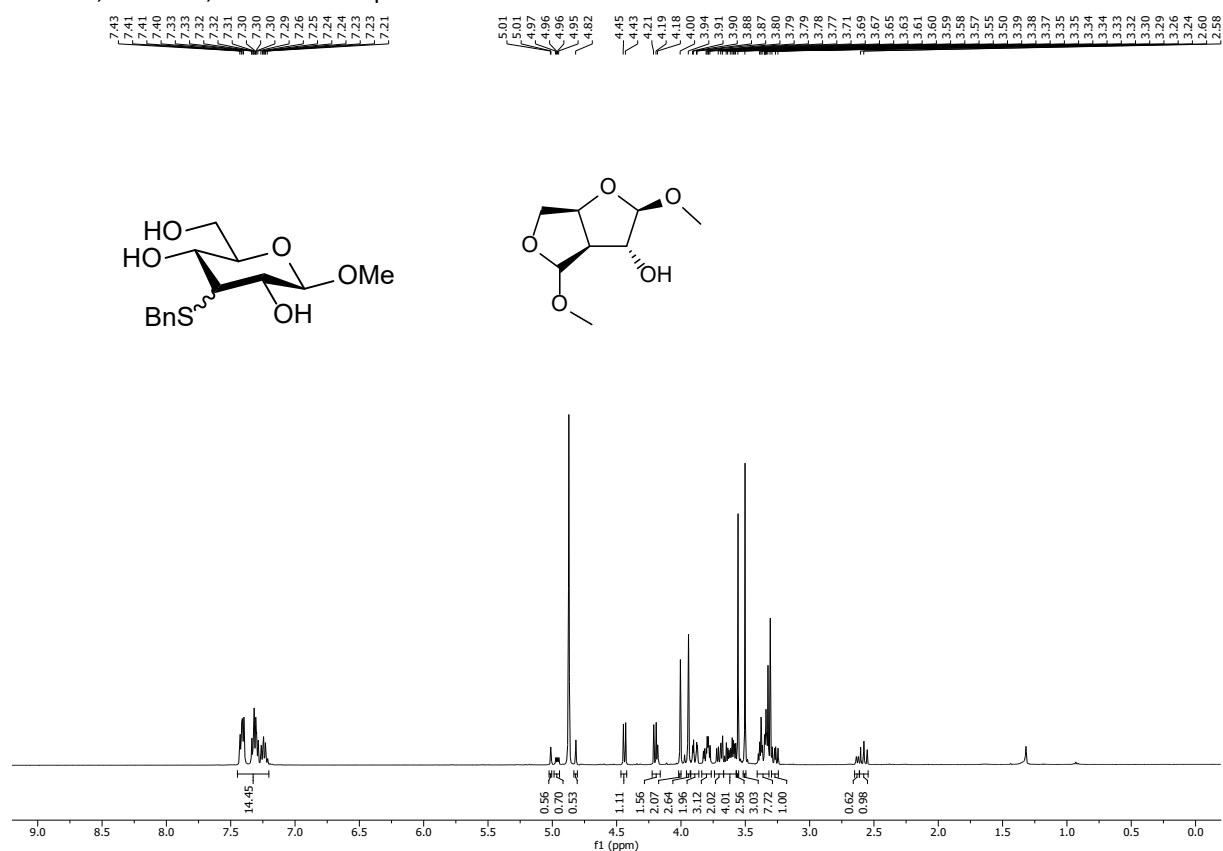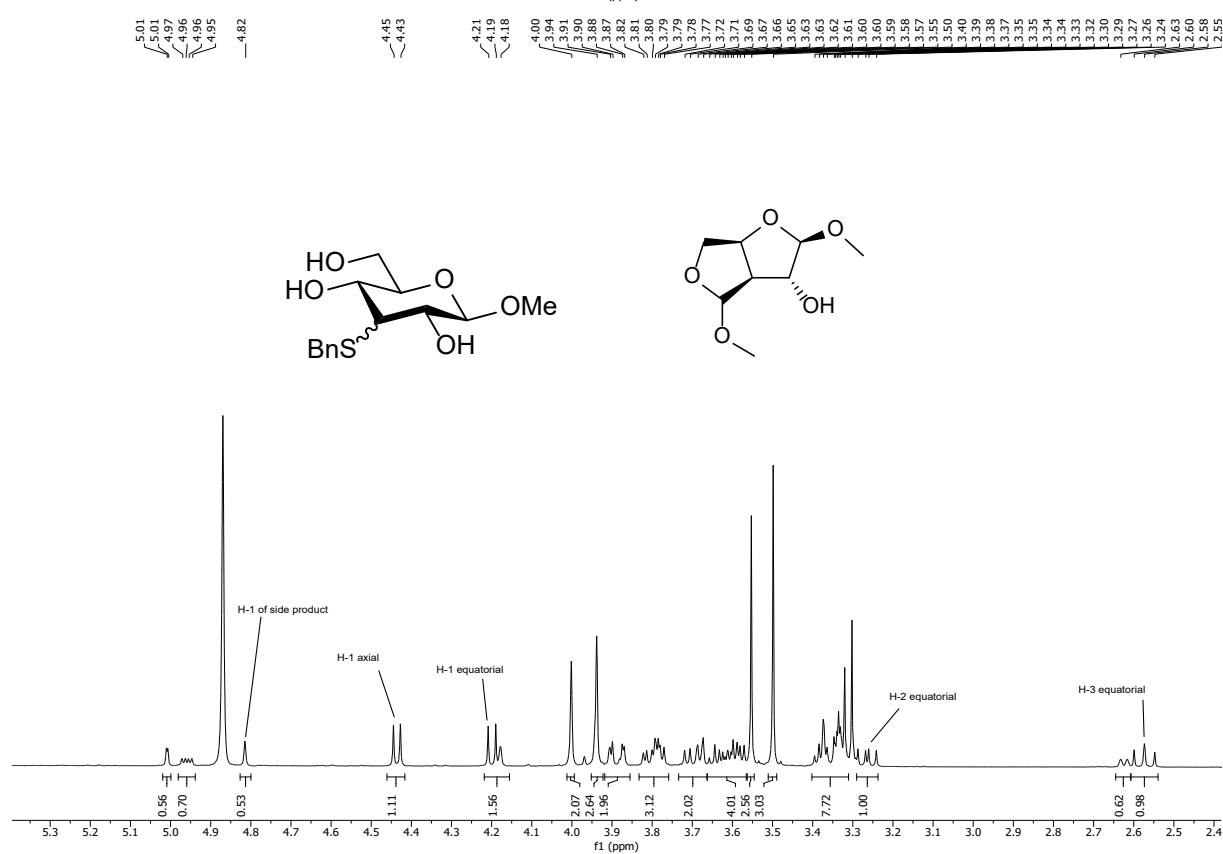

<sup>13</sup>C NMR, 101 MHz, CD<sub>3</sub>OD of compounds **14** and **S15**

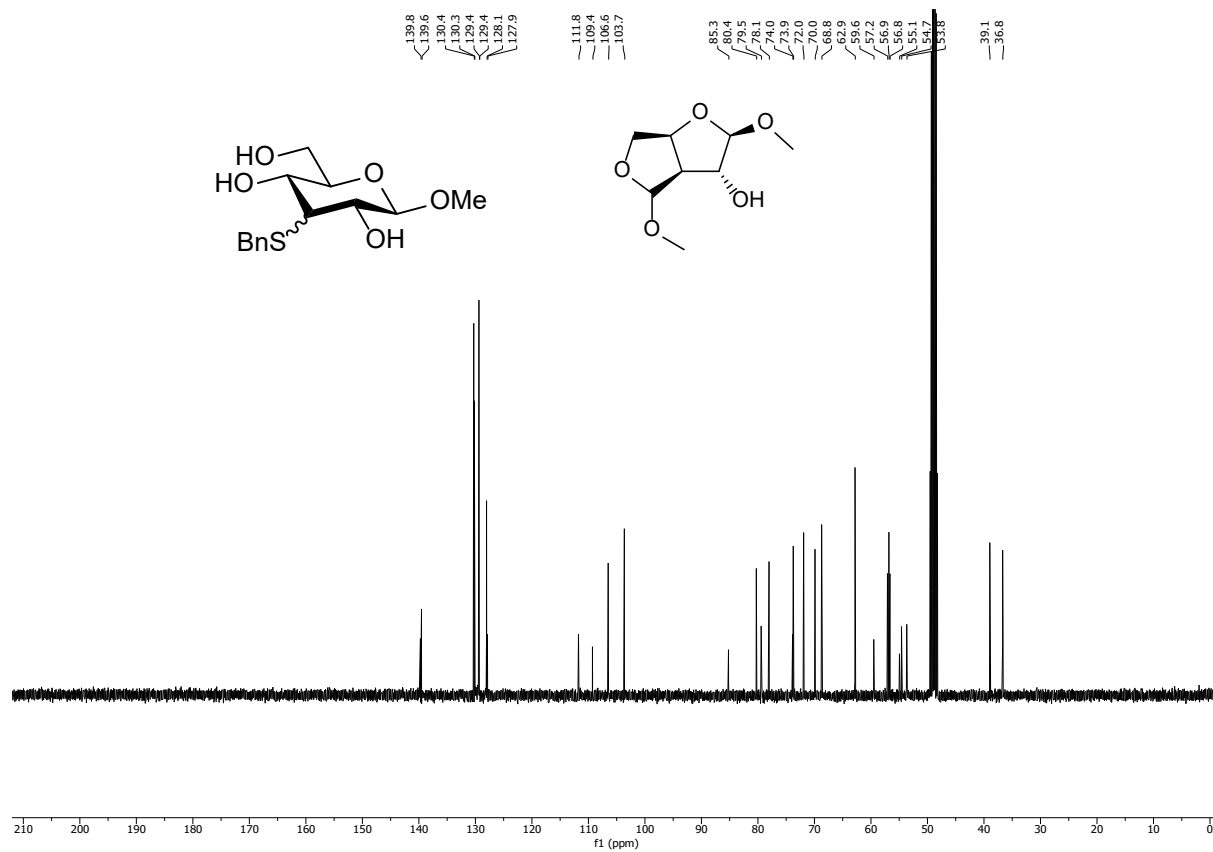

<sup>1</sup>H-<sup>1</sup>H COSY of compounds **14** and **S15**

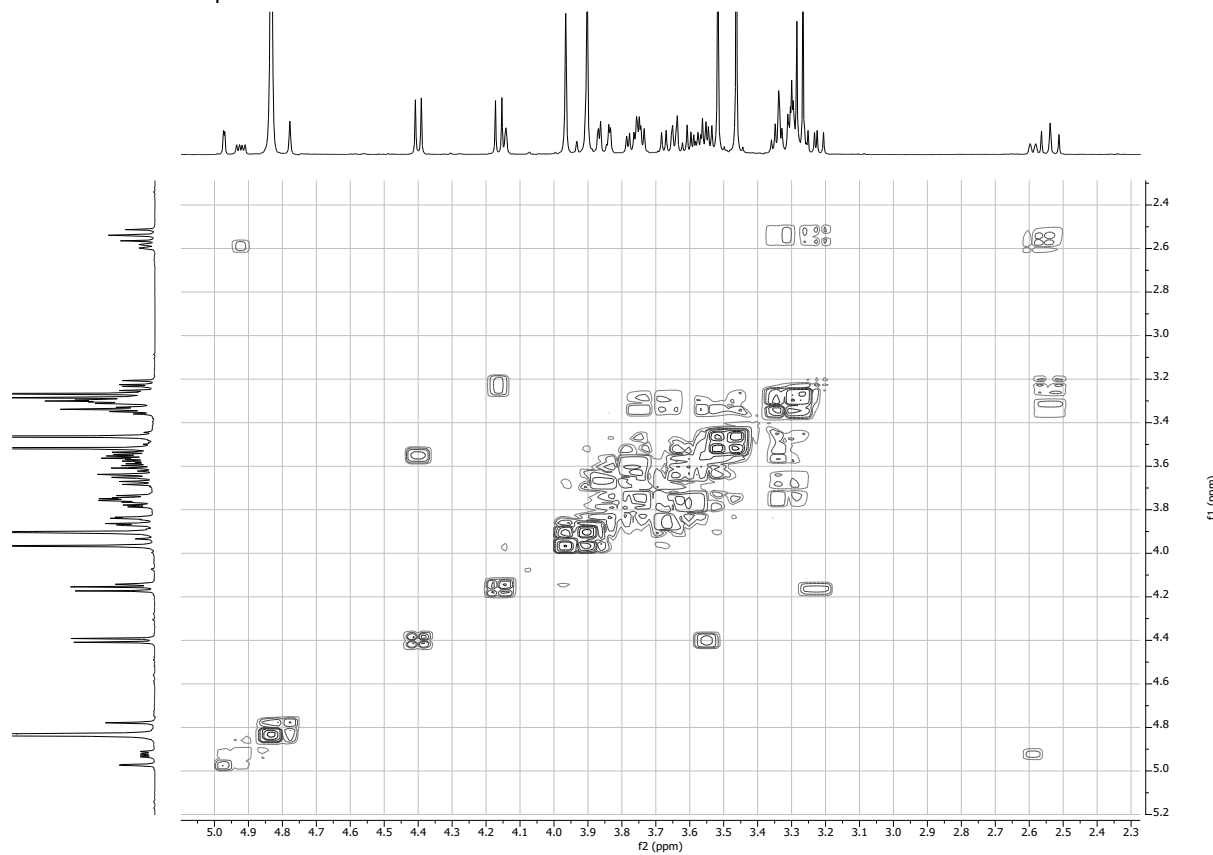

$^1\text{H}$ - $^{13}\text{C}$  HSQC of compounds **14** and **S15**

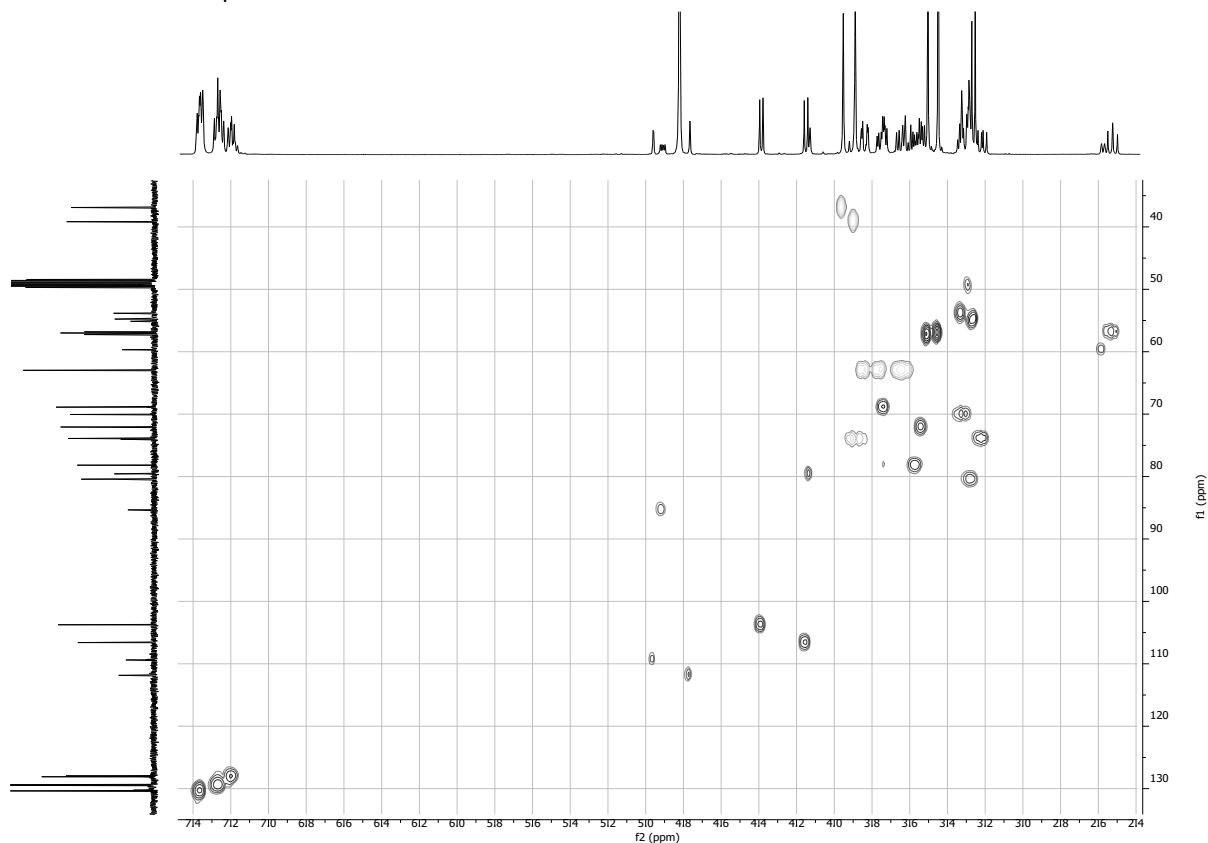

**NMR of S16, S17, and S-glycosides 20 and 22**

**Methyl 2,3,4-tri-O-acetyl-3-S-acetyl-3-deoxy- $\alpha$ -D-glucopyranoside (S16)**

$^1\text{H}$  NMR, 400 MHz,  $\text{CDCl}_3$  of compound **S16**

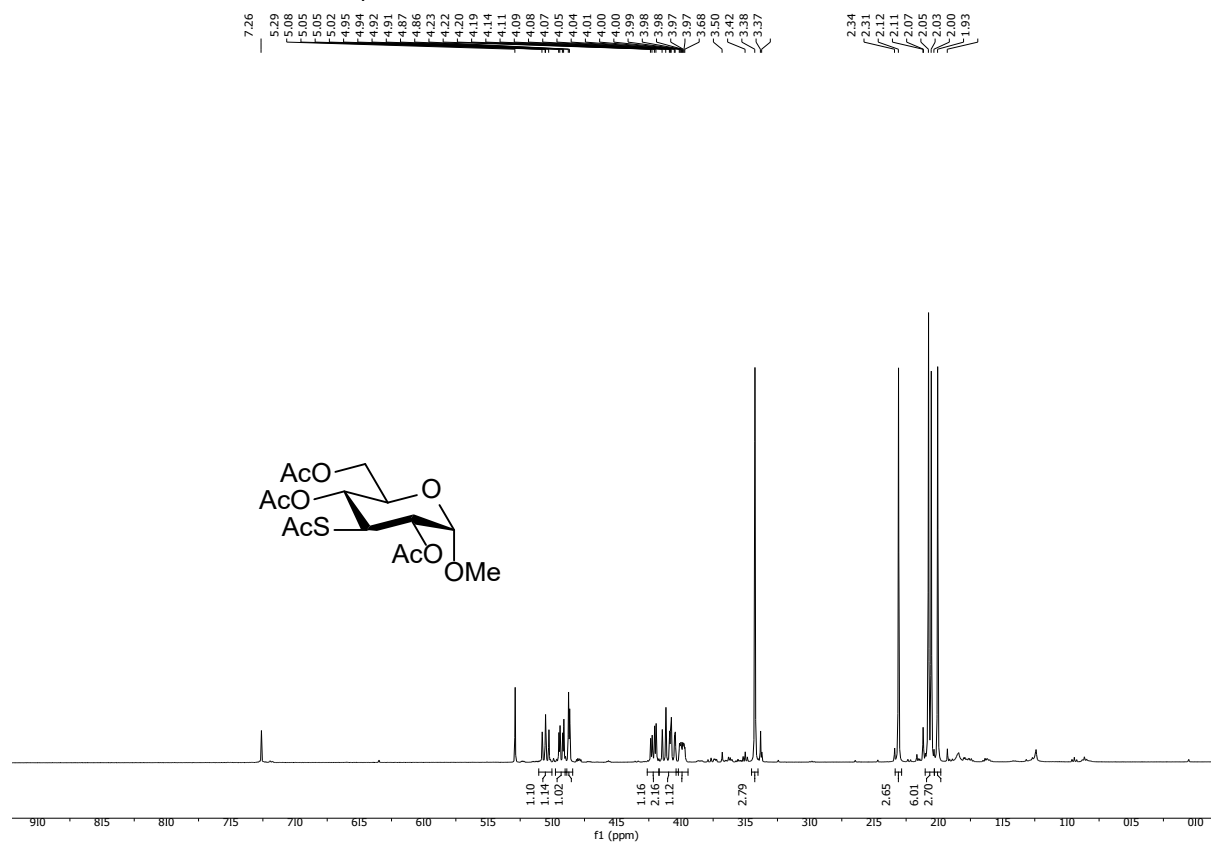

<sup>13</sup>C NMR, 101 MHz, CDCl<sub>3</sub> of compound **S16**

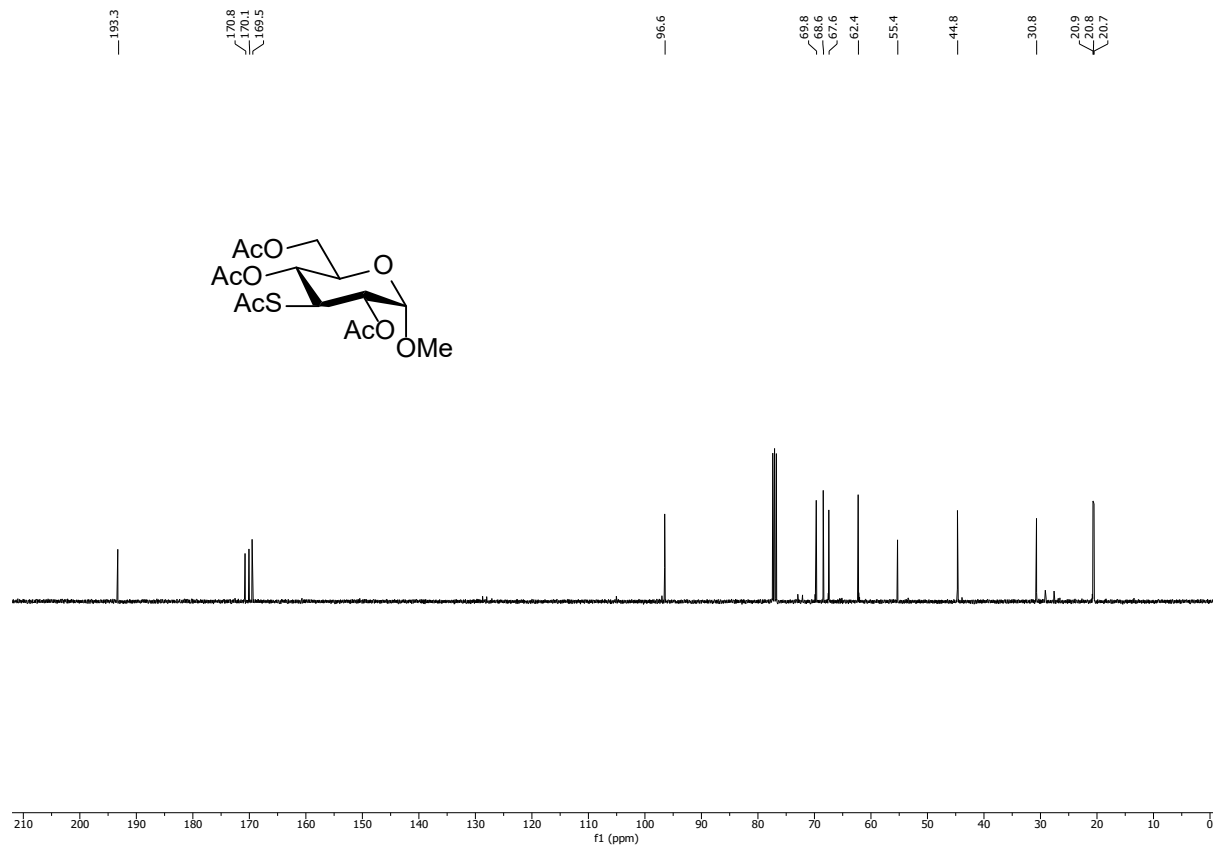

<sup>1</sup>H-<sup>1</sup>H COSY of compound **S16**

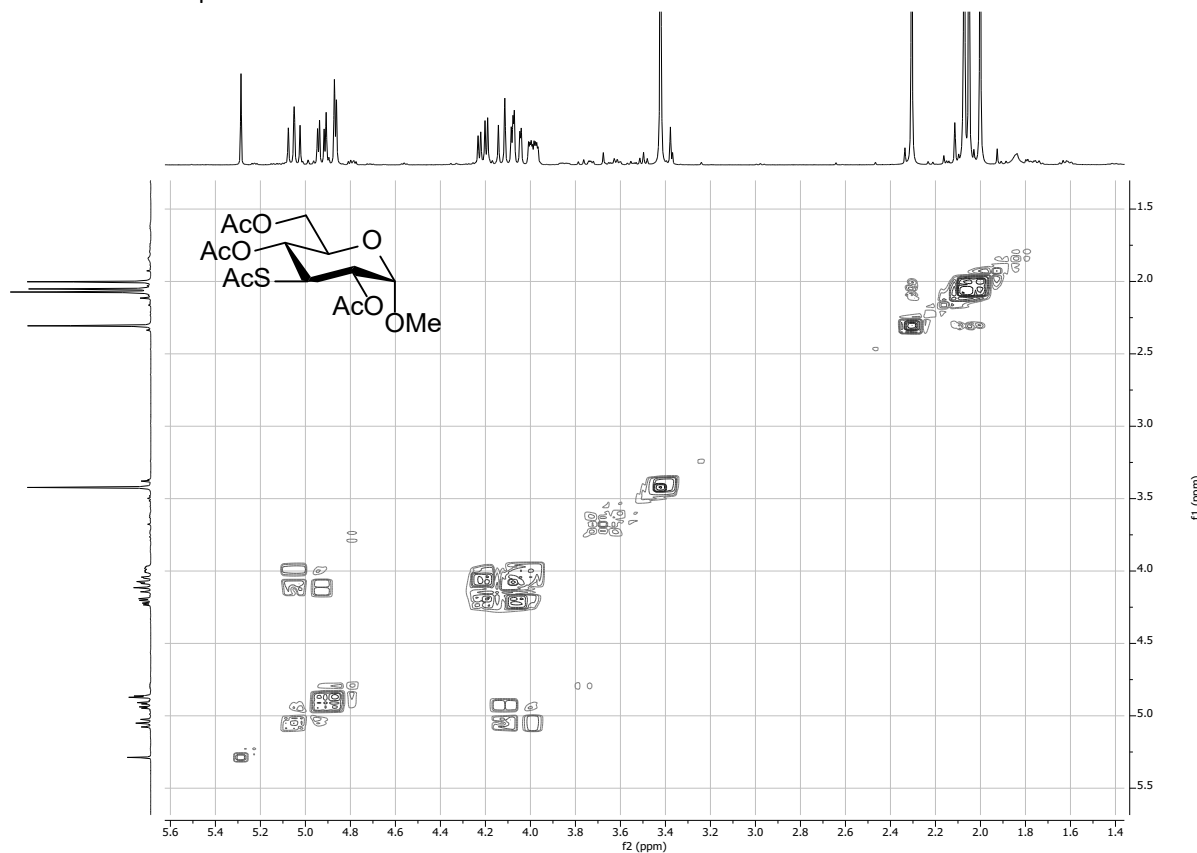

$^1\text{H}$ - $^{13}\text{C}$  HSQC of compound **S16**

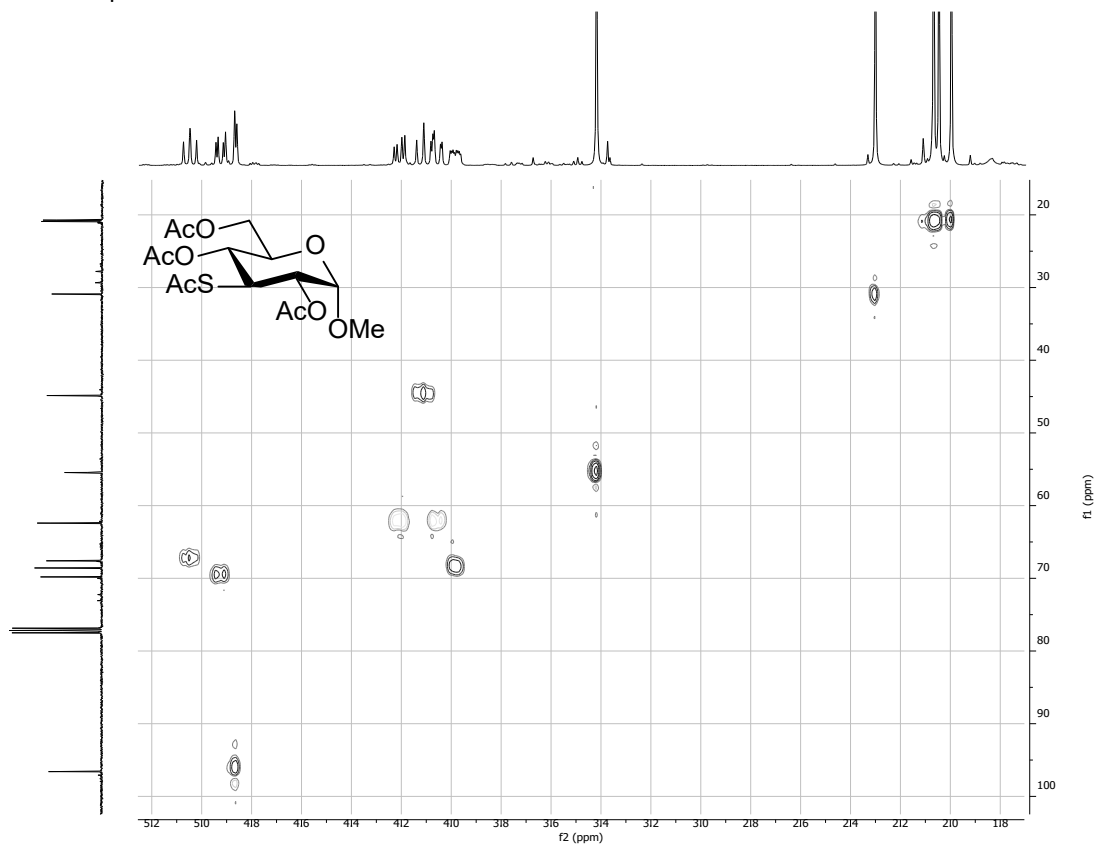

**Methyl 2,3,4,6-tri-O-acetyl-3-S-acetyl-3-deoxy- $\alpha$ -D-allopyranoside (S17)**

$^1\text{H}$  NMR, 400 MHz,  $\text{CDCl}_3$  of compound **S17**

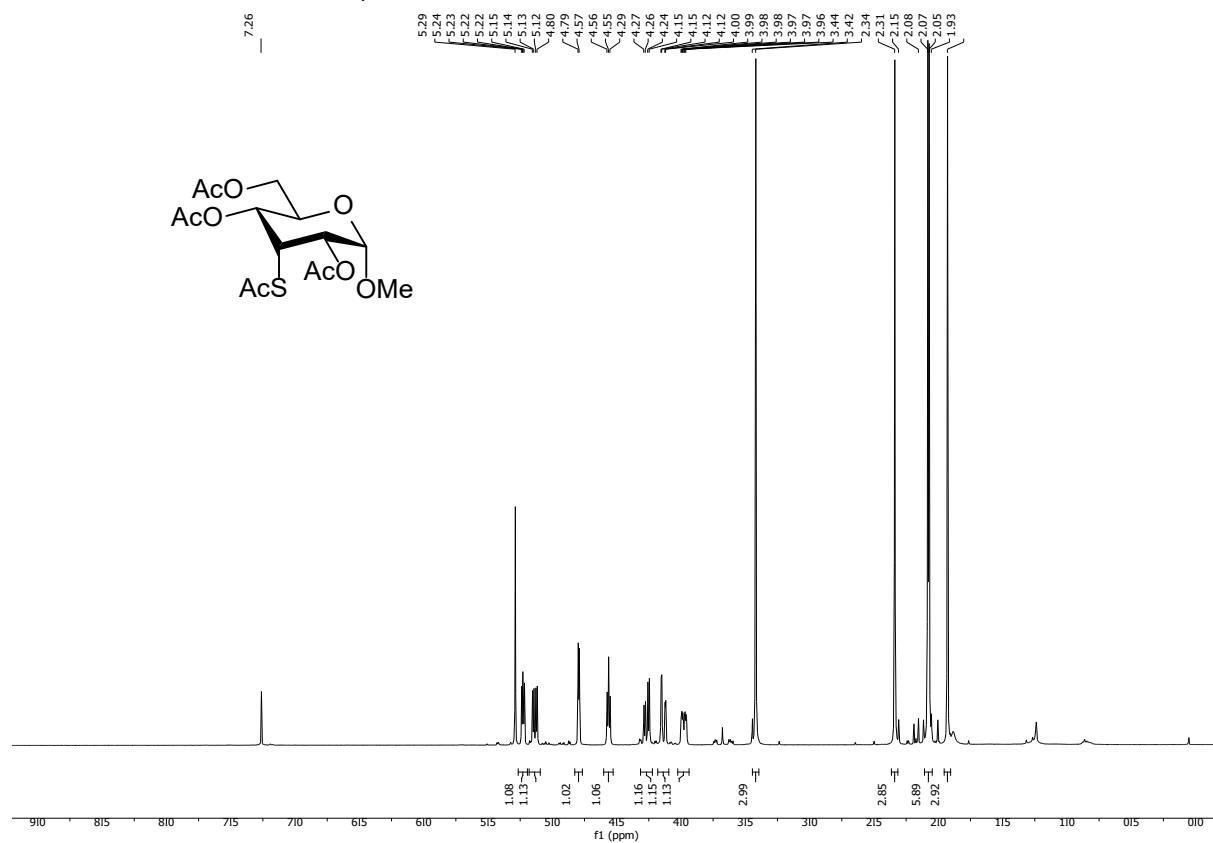

$^{13}\text{C}$  NMR, 101 MHz,  $\text{CDCl}_3$  of compound **S17**

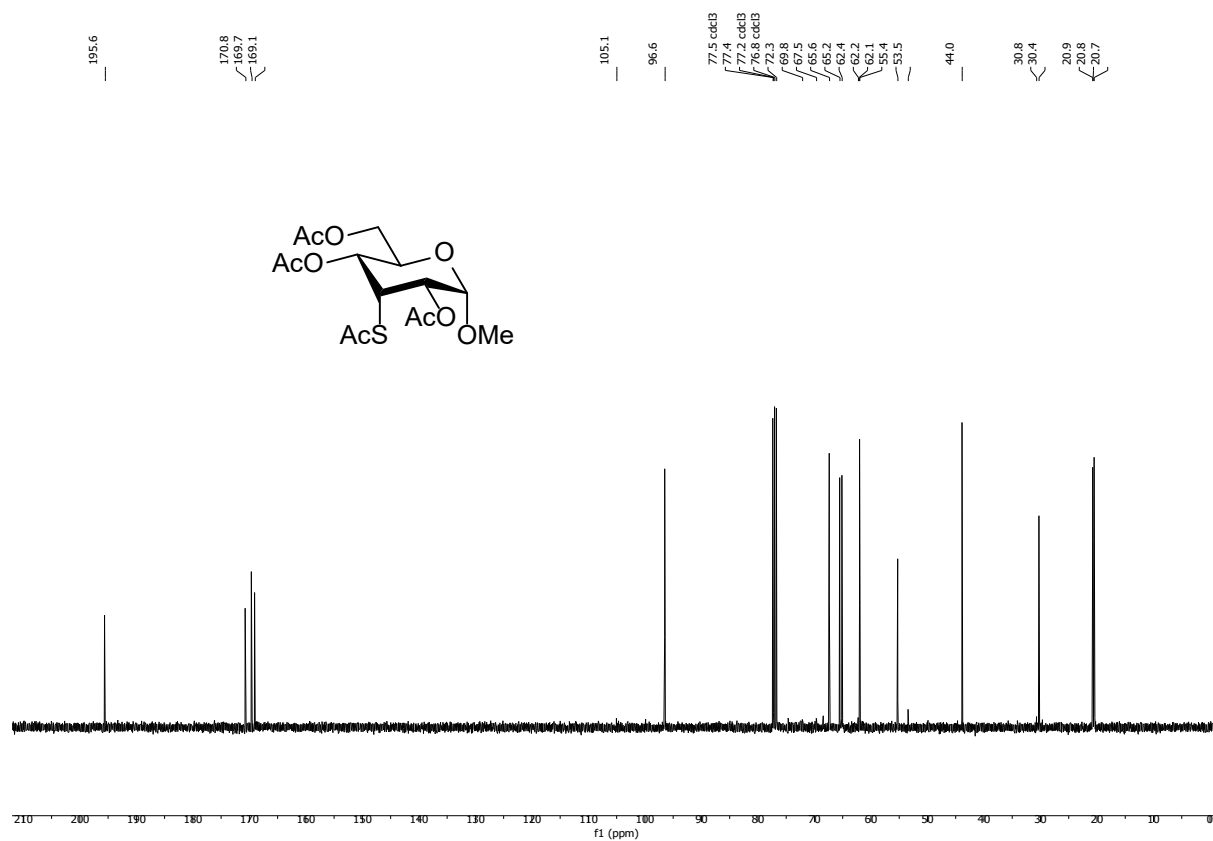

$^1\text{H}$ - $^1\text{H}$  COSY of compound **S17**

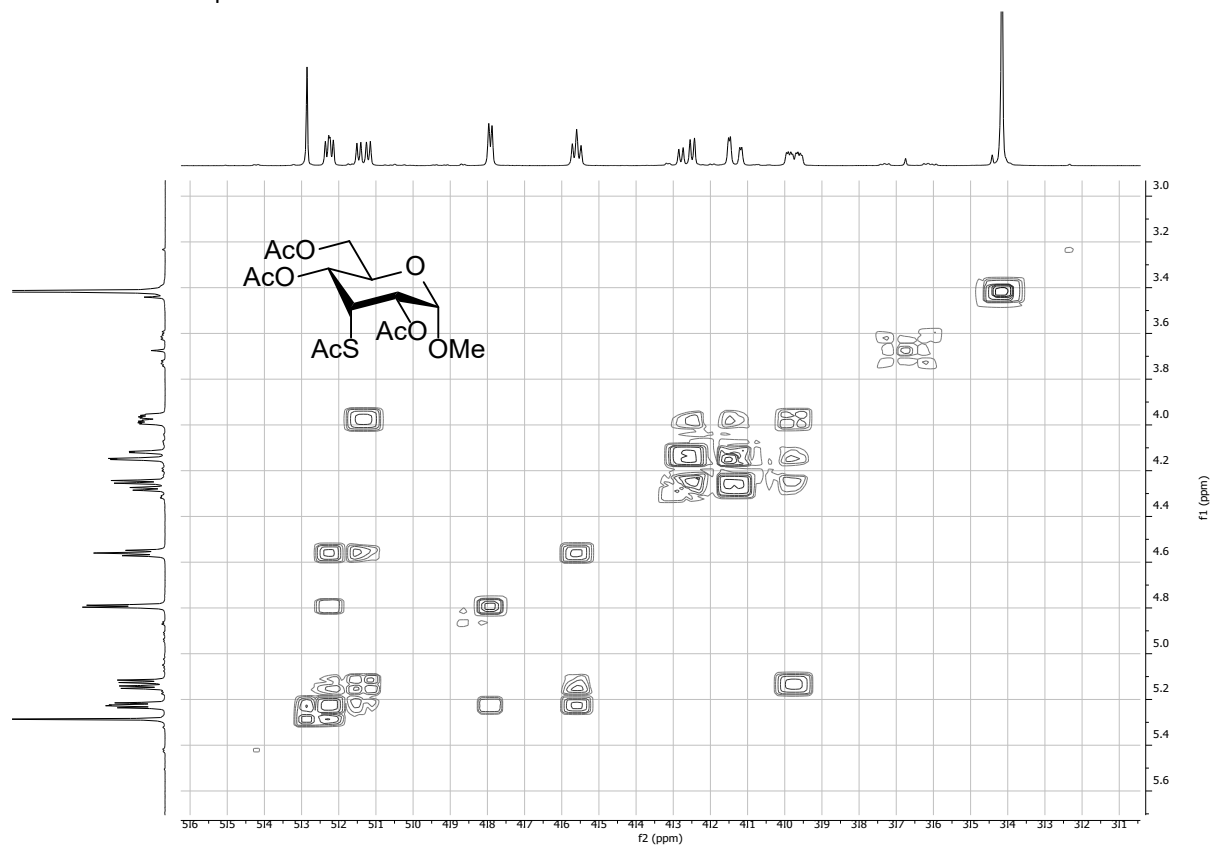

$^1\text{H}$ - $^{13}\text{C}$  HSQC of compound **S17**

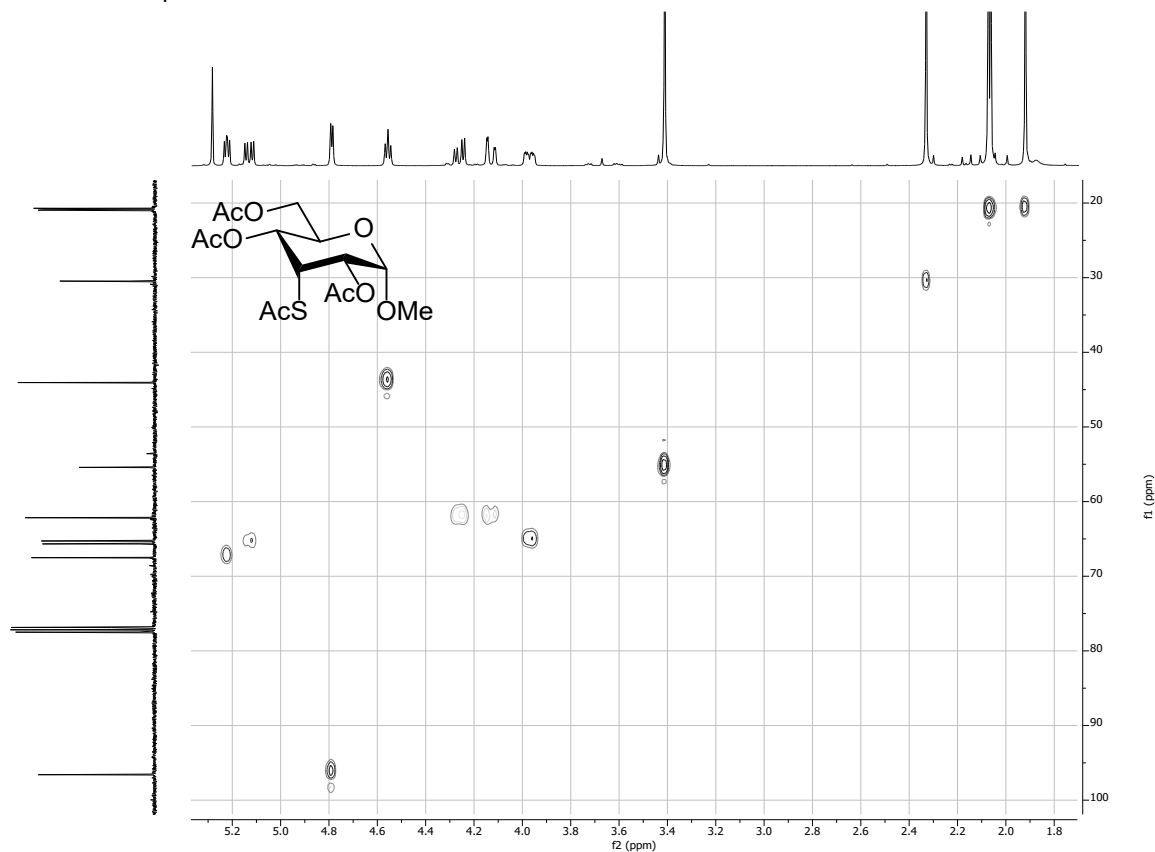

**Methyl 3-S- $\beta$ -D-glucopyranosyl-3-deoxy-3-thio- $\alpha$ -D-glucopyranoside (20)**

$^1\text{H}$  NMR, 400 MHz,  $\text{CDCl}_3$  of compound **20**

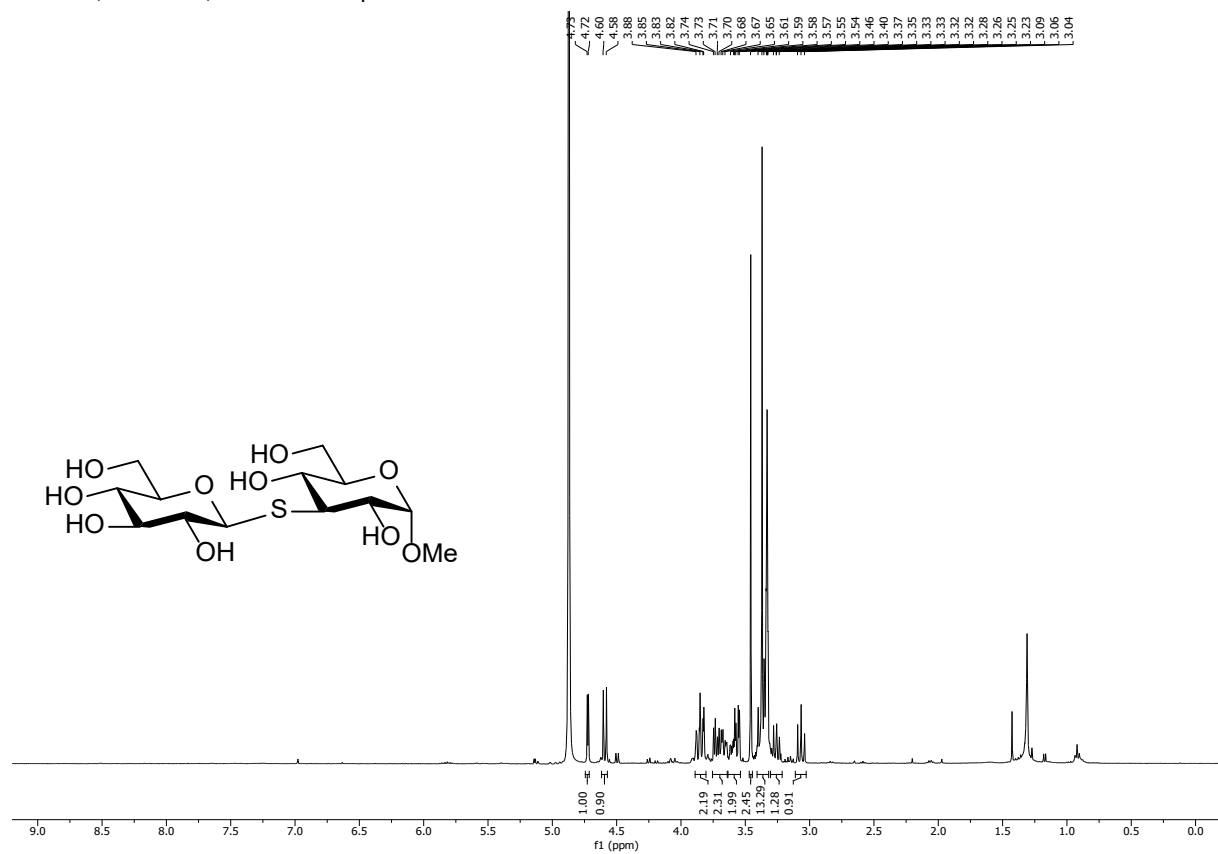

$^{13}\text{C}$  NMR, 101 MHz,  $\text{CDCl}_3$  of compound **20**

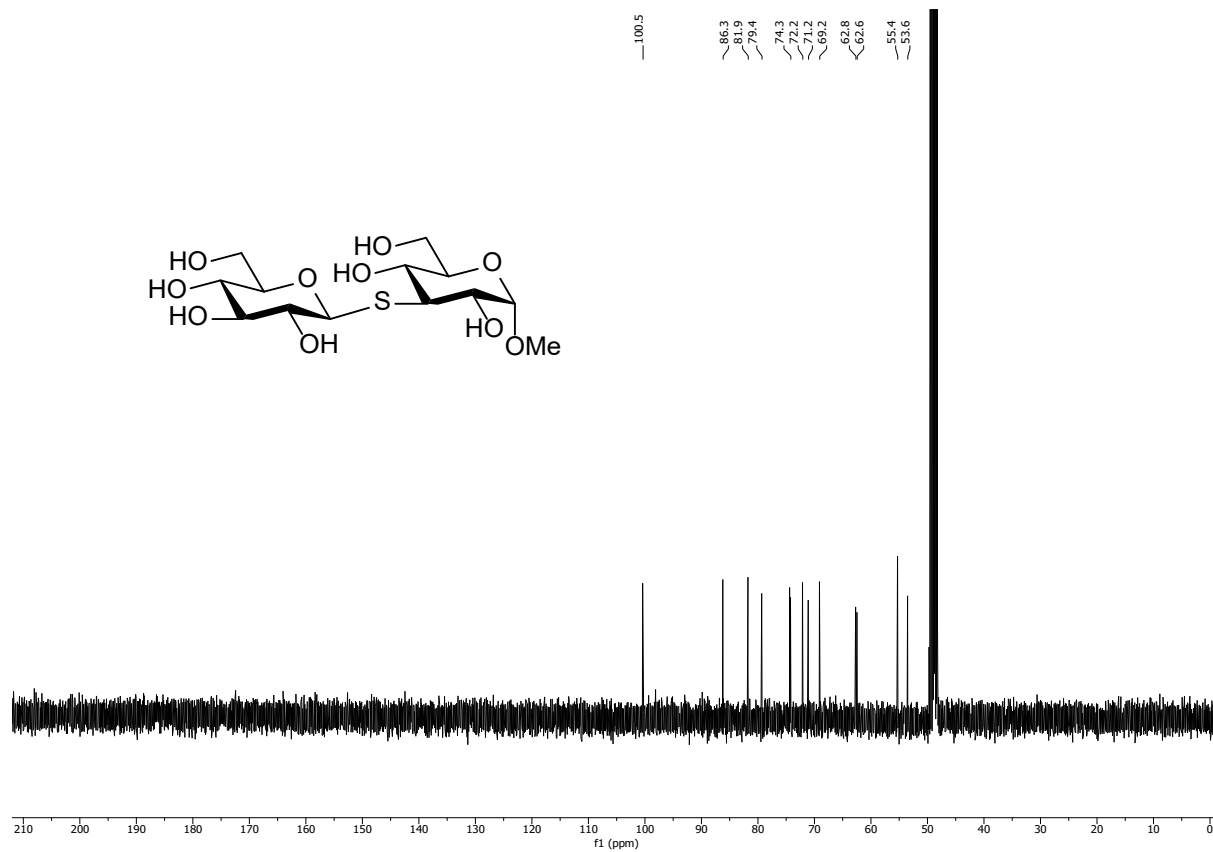

$^1\text{H}$ - $^1\text{H}$  COSY of compound **20**

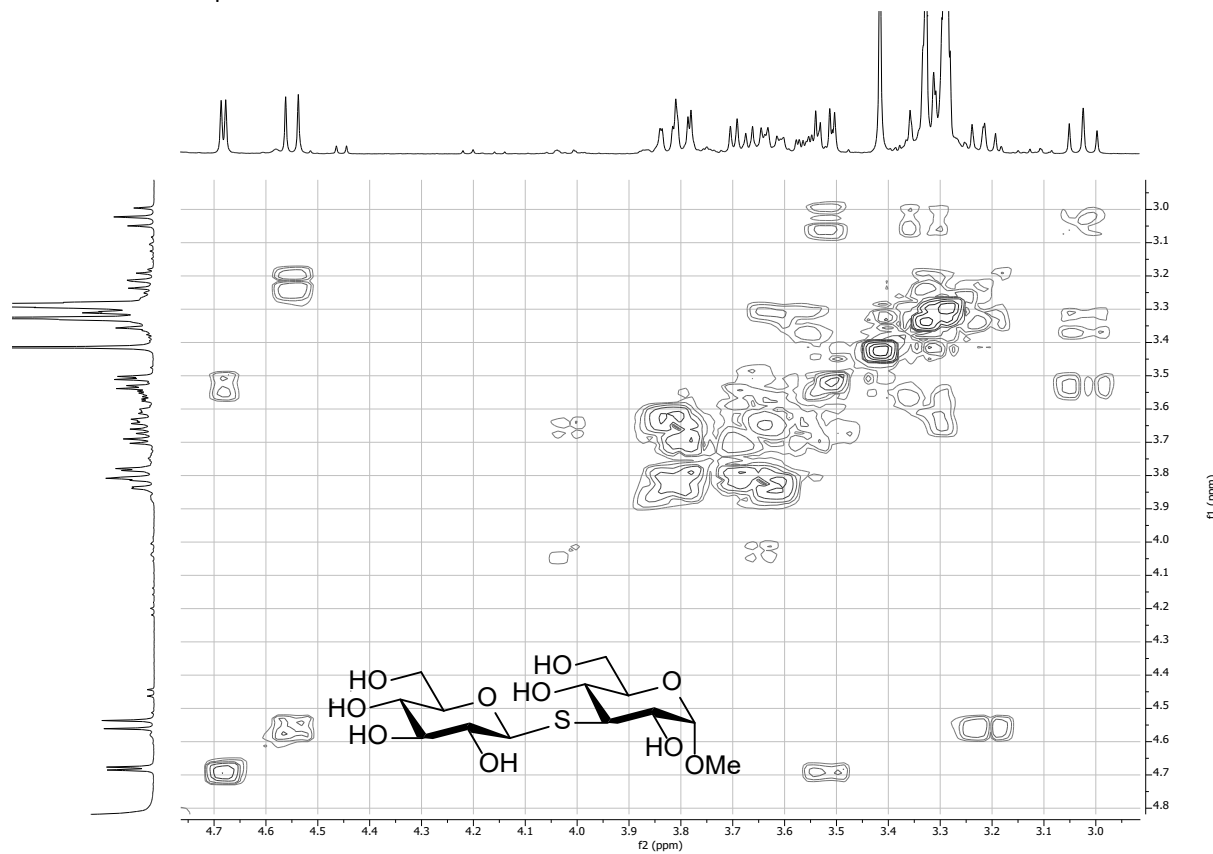



$^1\text{H}$ - $^{13}\text{C}$  HSQC of compound **20**

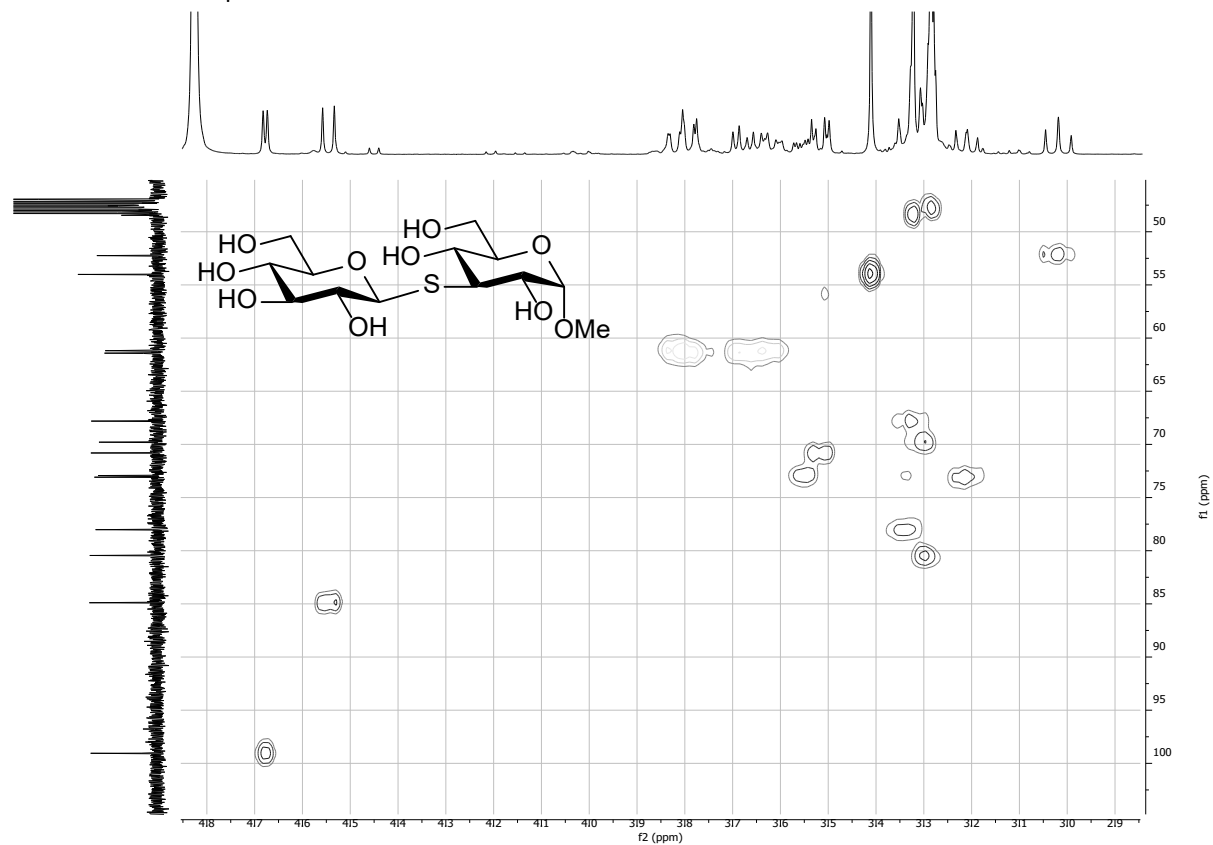

Methyl 3-S- $\beta$ -D-glucopyranosyl-3-deoxy-3-thio- $\alpha$ -D-allopyranoside (**22**)

$^1\text{H}$  NMR, 400 MHz,  $\text{CDCl}_3$  of compound **22**

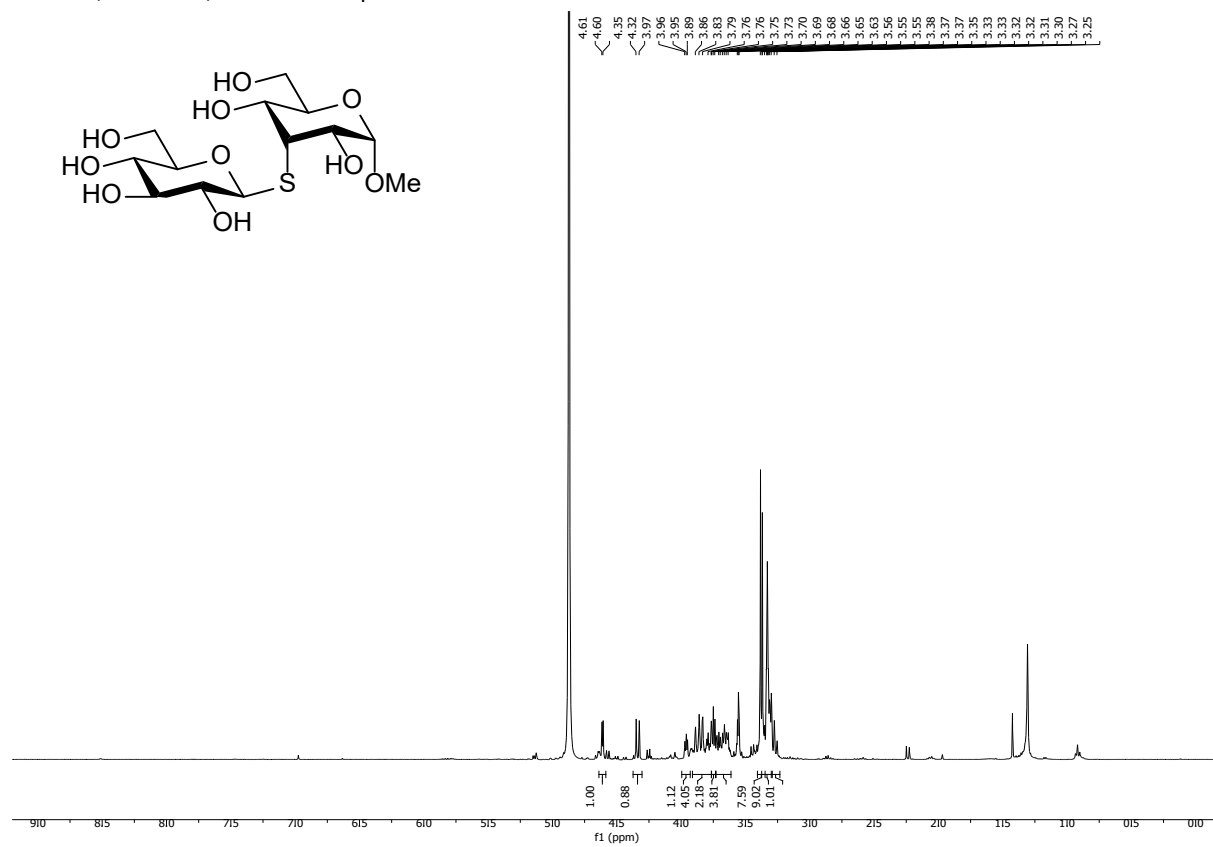

$^{13}\text{C}$  NMR, 101 MHz,  $\text{CDCl}_3$  of compound **22**

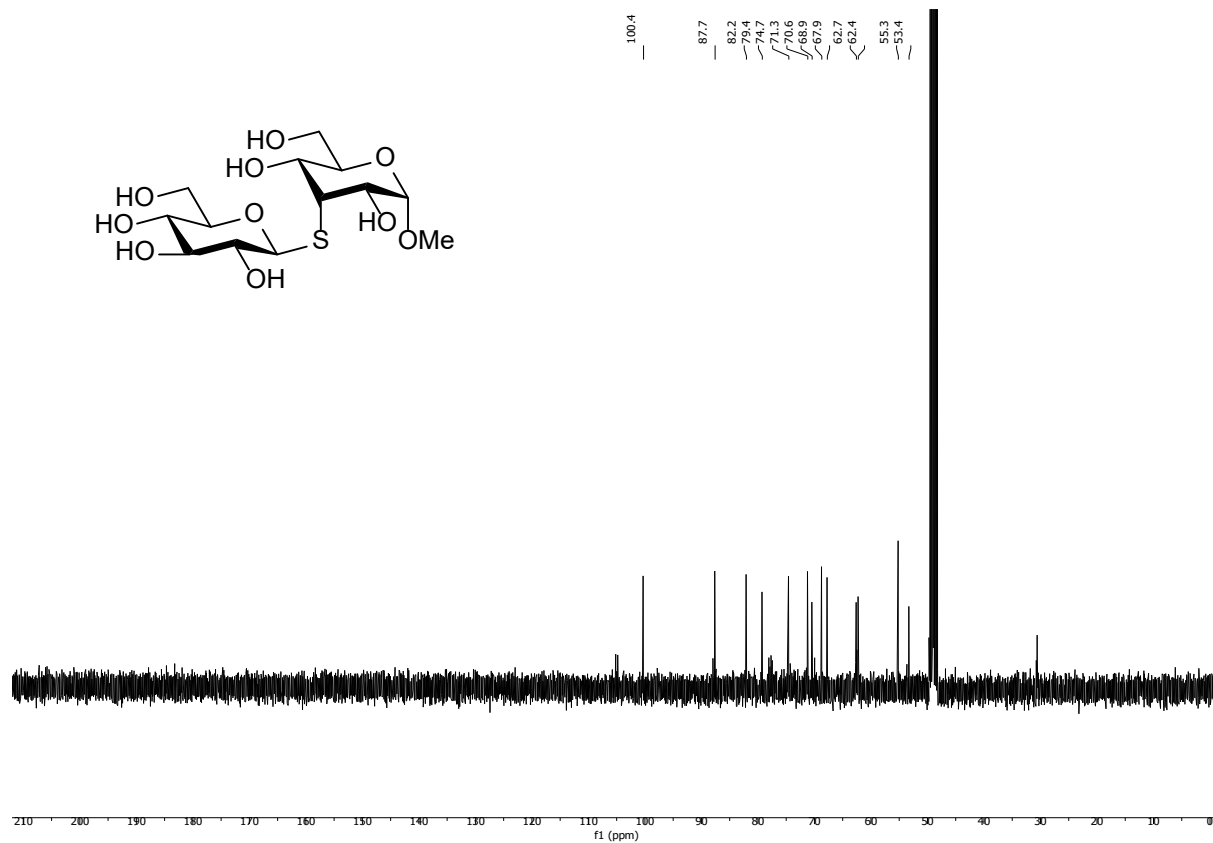

$^1\text{H}$ - $^1\text{H}$  COSY of compound **22**

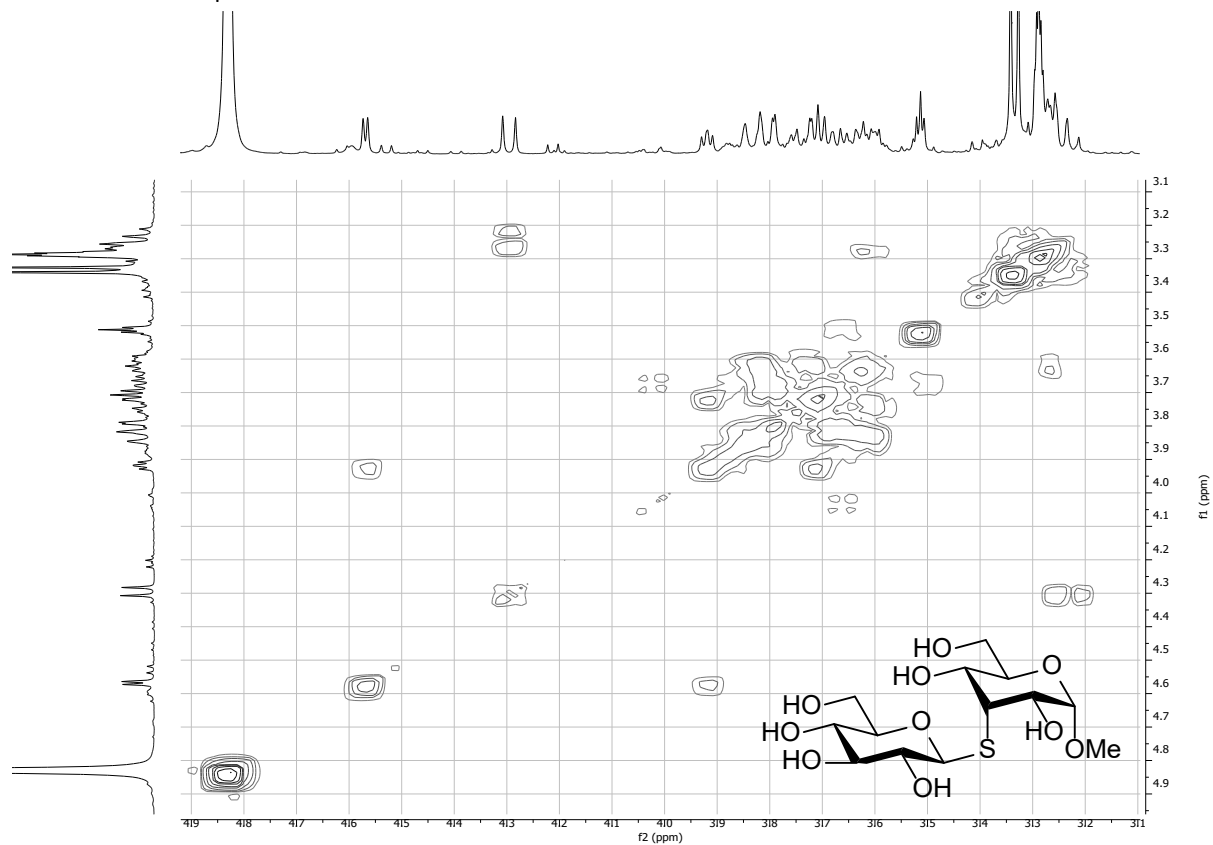

$^1\text{H}$ - $^{13}\text{C}$  HSQC of compound **22**

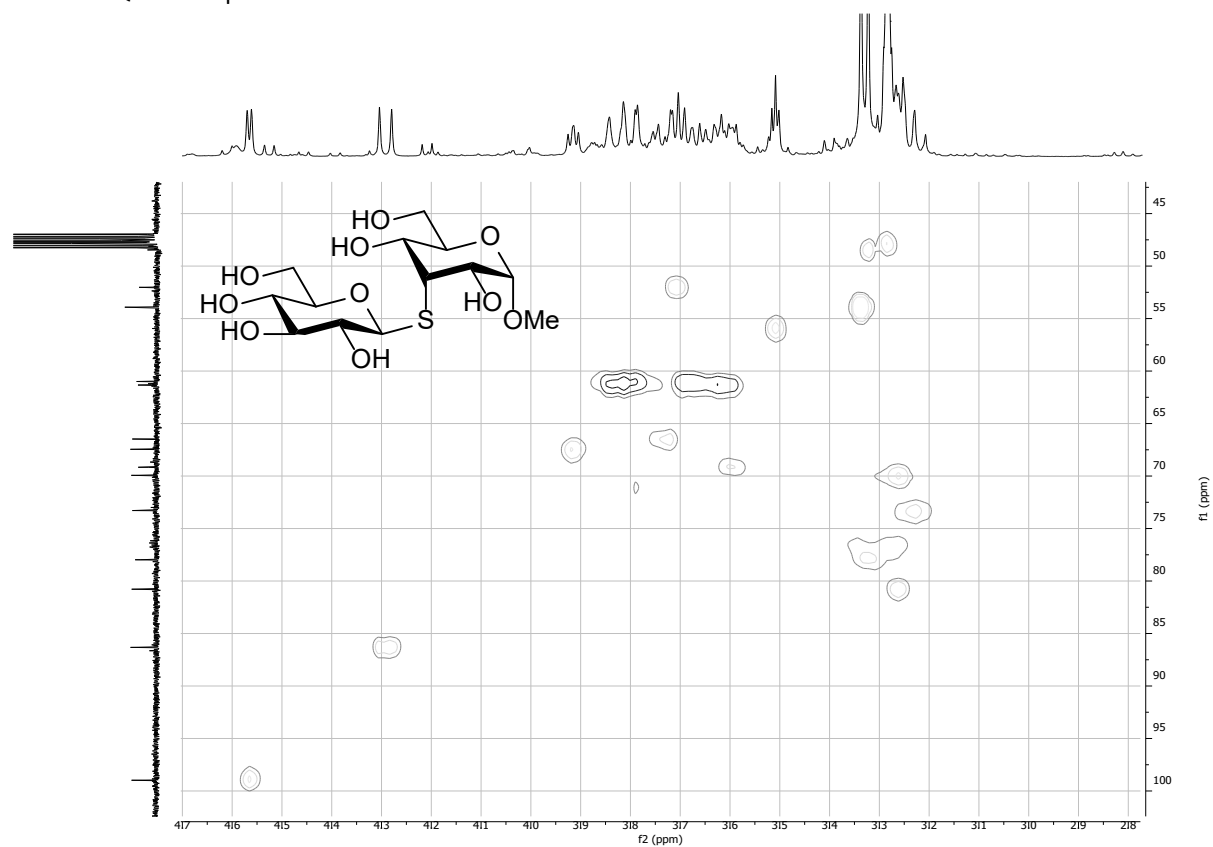

# HRMS spectra

## HRMS spectra of substitution reactions on chloroglycosides

### Methyl 3-azido-3-deoxy- $\alpha$ -D-glucopyranoside (4)

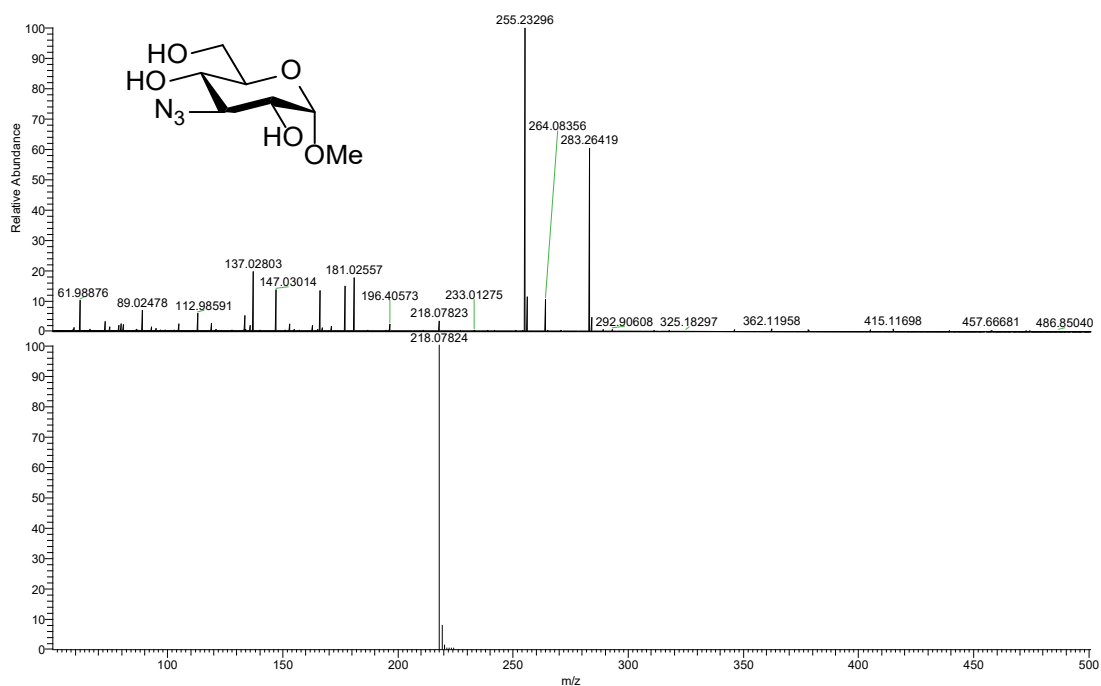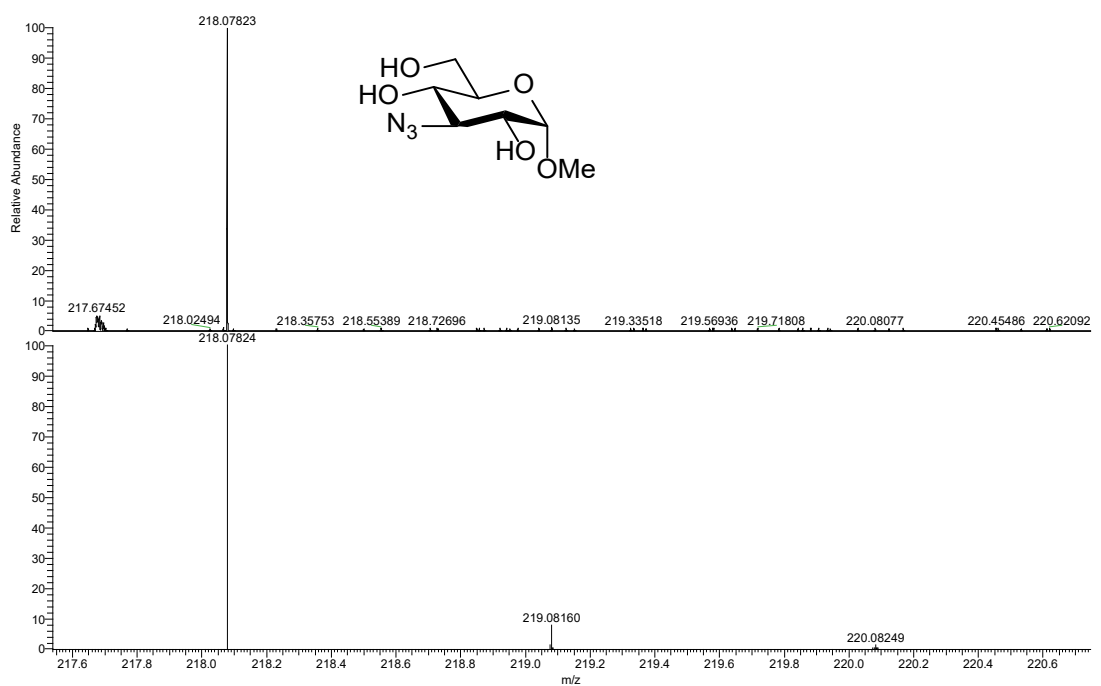

# Methyl 2-azido-2-deoxy- $\alpha$ -D-altropyranoside (S1)

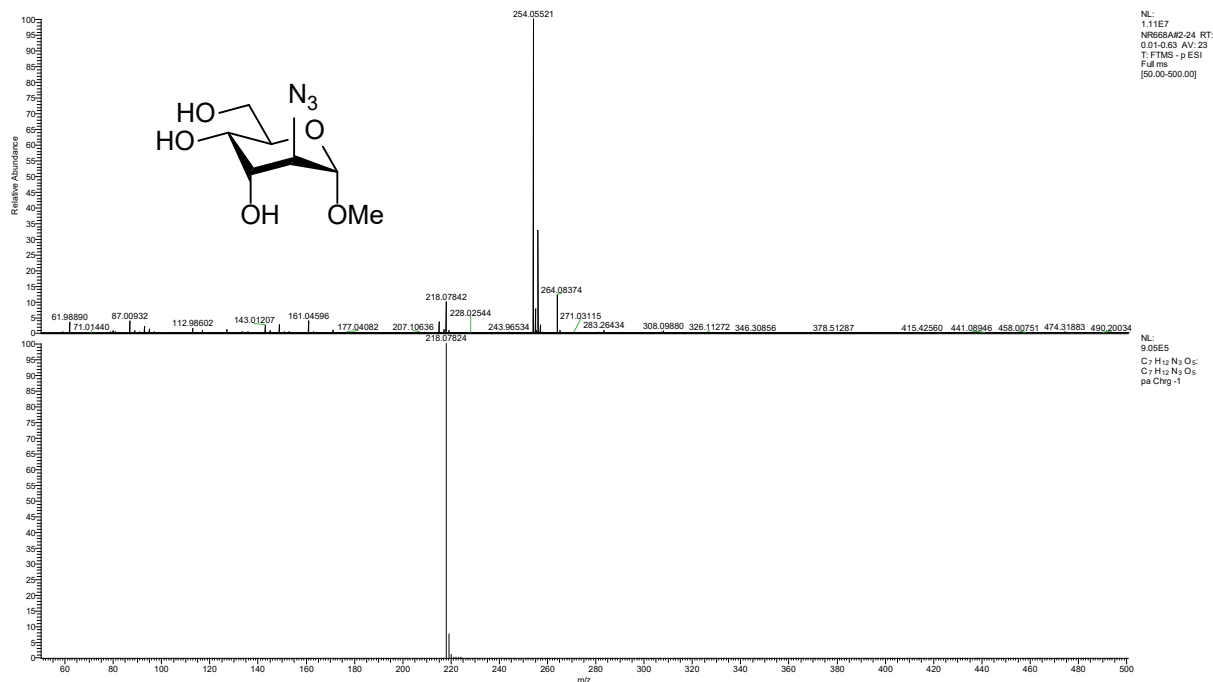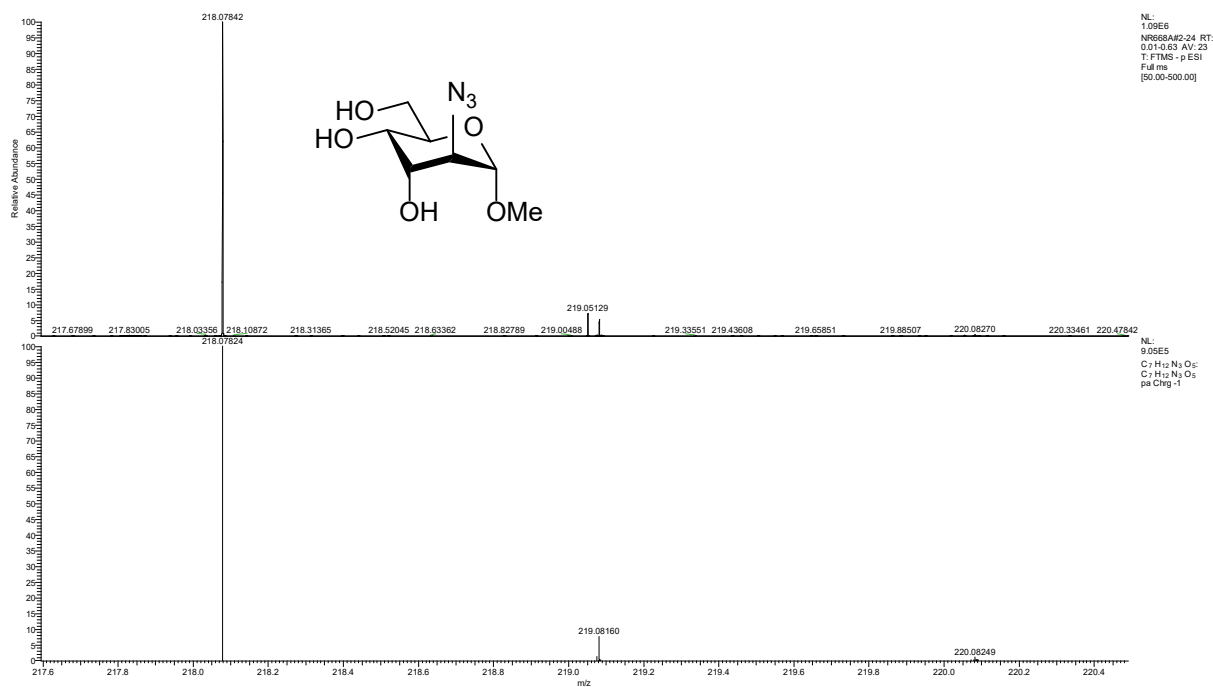

### Isopropyl 2-acetmido-3-azido-2,3-dideoxy- $\alpha$ -D-glucopyranoside (S3)

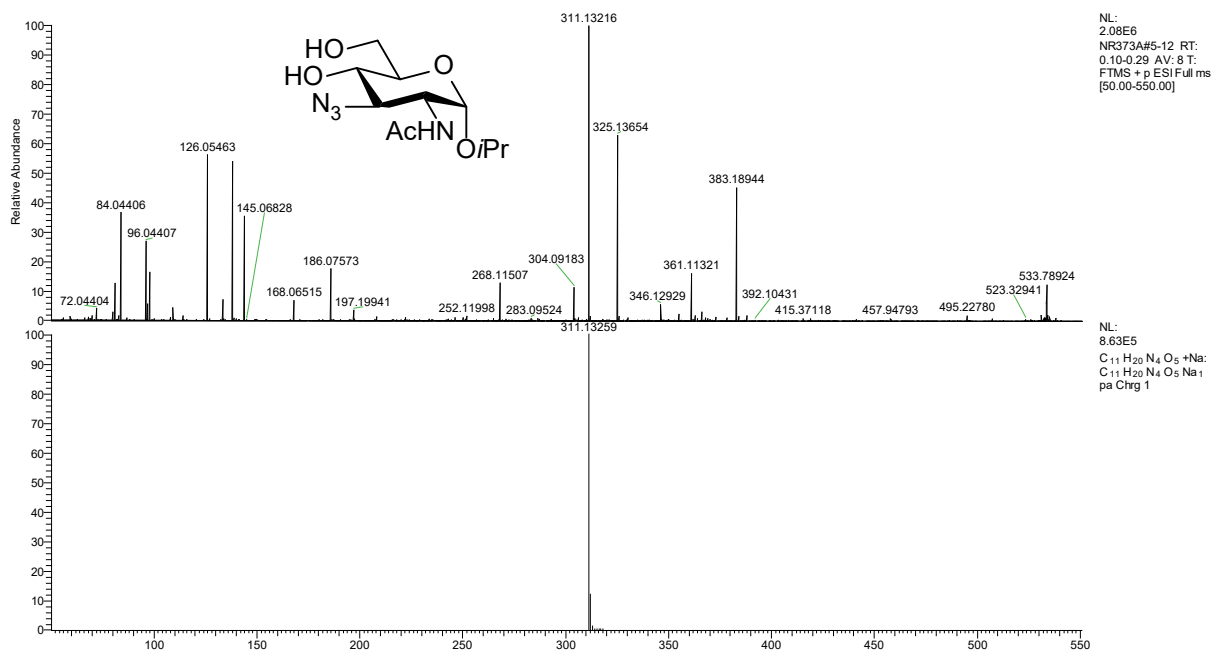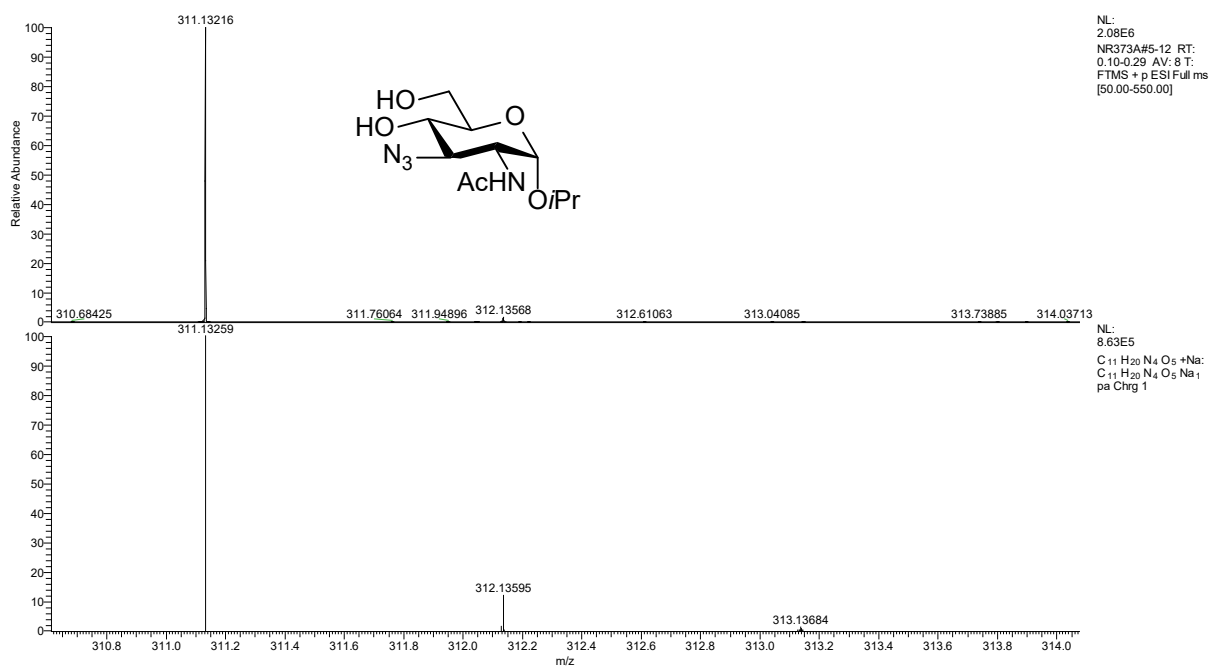

### Sideproduct of the azide intruccion on GlcNAc (S4)

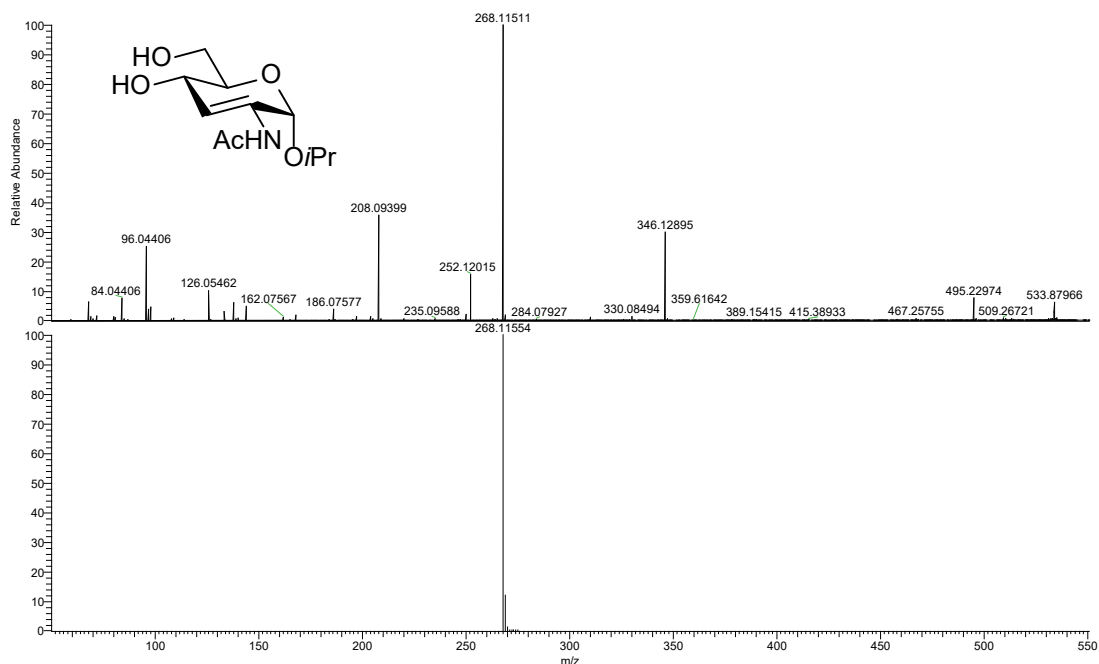

NL:  
4.34E6  
NR373B#5-12 RT:  
0.10-0.29 AV: 8 T:  
FTMS + p ESI Full  
ms [50.00-550.00]

NL:  
8.73E5  
C<sub>11</sub>H<sub>19</sub>NO<sub>5</sub>+Na:  
C<sub>11</sub>H<sub>19</sub>N<sub>1</sub>O<sub>5</sub>Na<sub>1</sub>  
pa Chrg 1

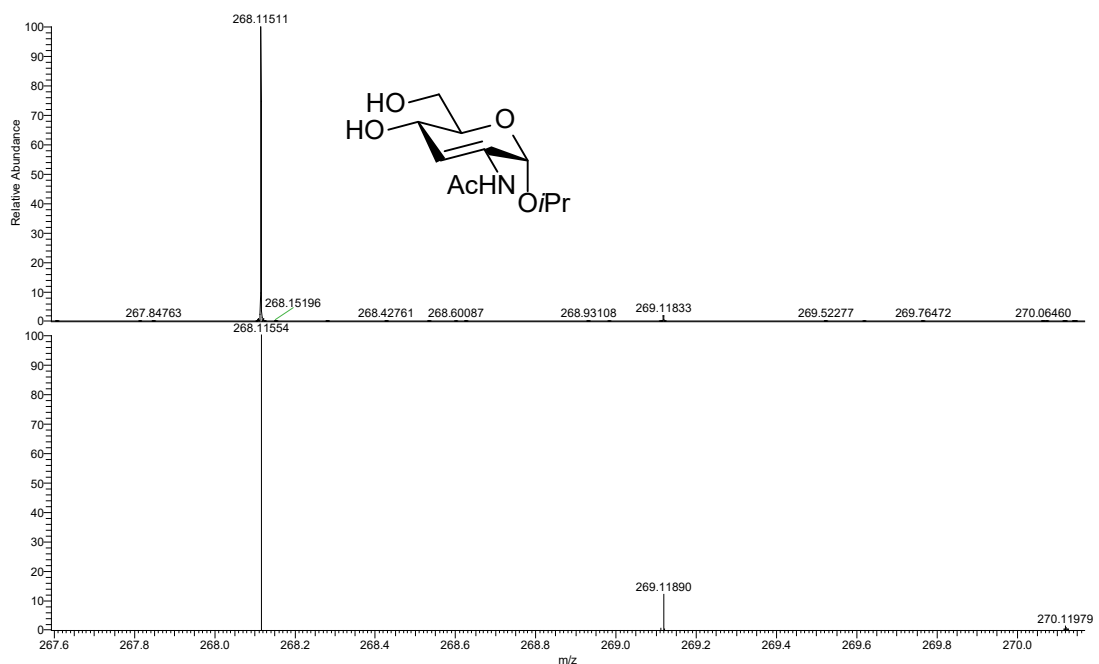

NL:  
4.34E6  
NR373B#5-12 RT:  
0.10-0.29 AV: 8 T:  
FTMS + p ESI Full  
ms [50.00-550.00]

NL:  
8.73E5  
C<sub>11</sub>H<sub>19</sub>NO<sub>5</sub>+Na:  
C<sub>11</sub>H<sub>19</sub>N<sub>1</sub>O<sub>5</sub>Na<sub>1</sub>  
pa Chrg 1

**4-tert-butylbenzyl-3-azido-3-deoxy- $\alpha$ -D-maltoside (S6)**

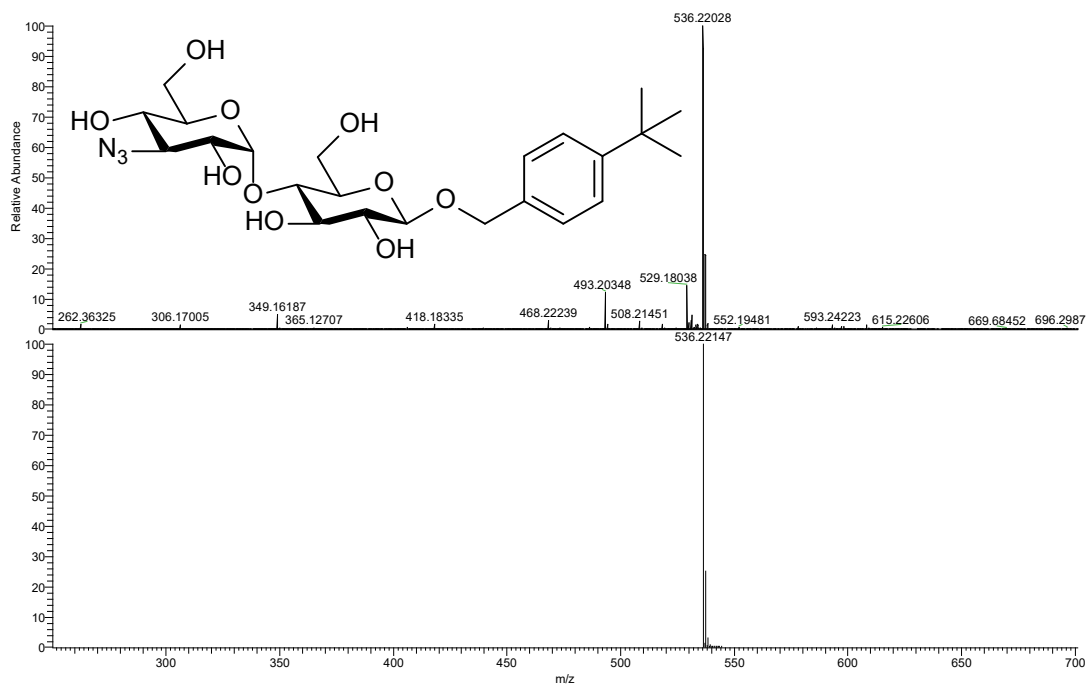

NL:  
5.71E6  
NR374#2-24 RT:  
0.01-0.62 AV: 23 T:  
FTMS + p ESI Full  
ms [250.00-700.00]

NL:  
7.51E5  
C<sub>23</sub>H<sub>35</sub>N<sub>3</sub>O<sub>10</sub> Na:  
C<sub>23</sub>H<sub>35</sub>N<sub>3</sub>O<sub>10</sub> Na<sub>1</sub>  
pa Chrg 1

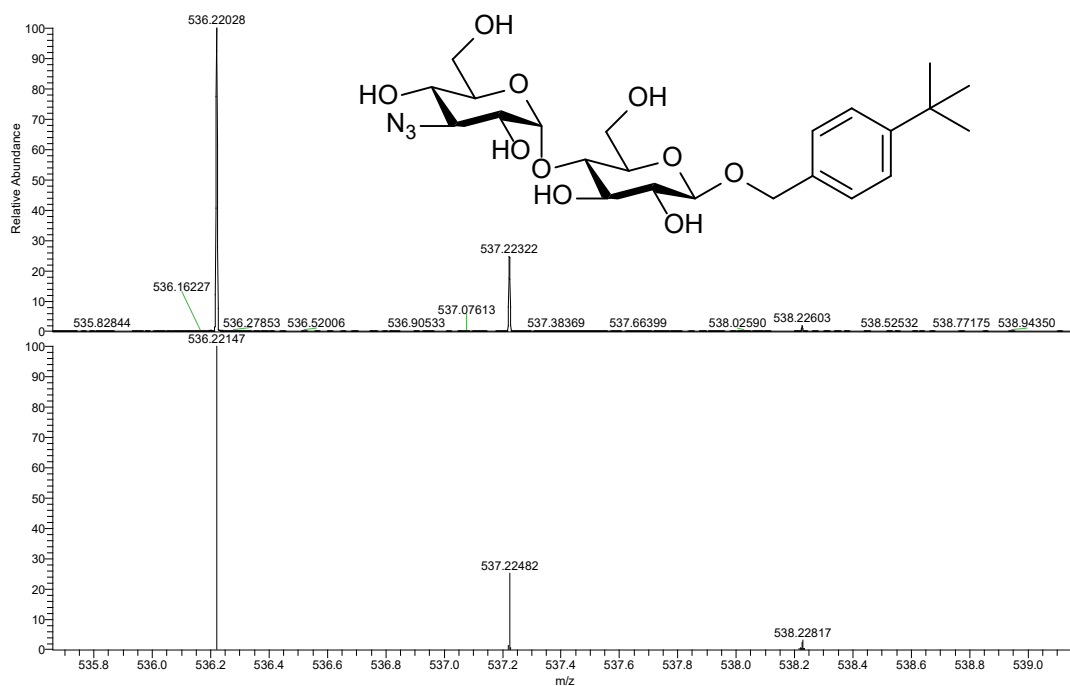

NL:  
5.71E6  
NR374#2-24 RT:  
0.01-0.62 AV: 23 T:  
FTMS + p ESI Full  
ms [250.00-700.00]

NL:  
7.51E5  
C<sub>23</sub>H<sub>35</sub>N<sub>3</sub>O<sub>10</sub> Na:  
C<sub>23</sub>H<sub>35</sub>N<sub>3</sub>O<sub>10</sub> Na<sub>1</sub>  
pa Chrg 1



**4-tert-butylbenzyl-β-D-glucopyranoside (17)**

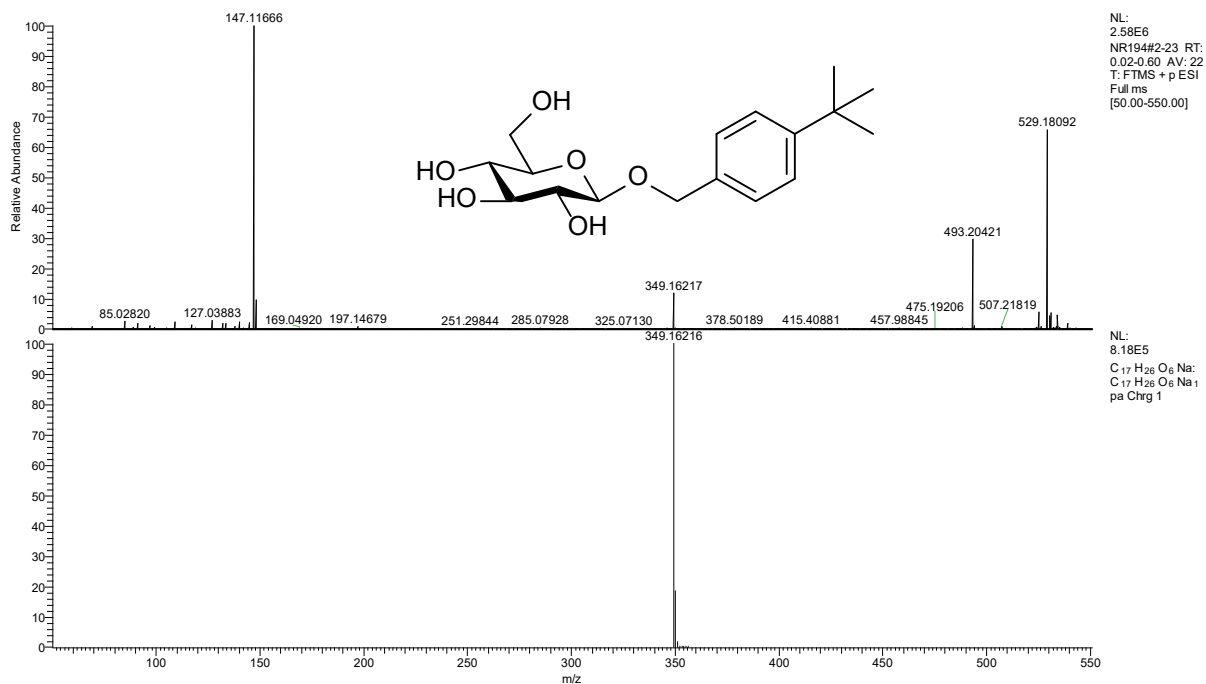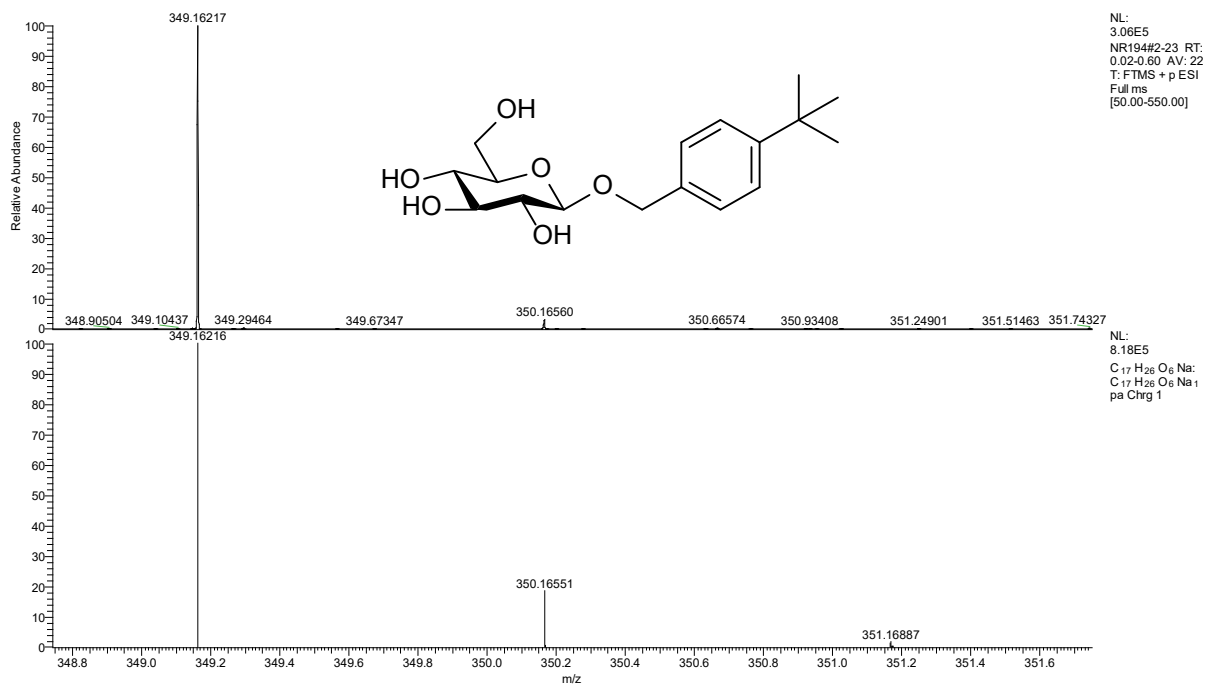

**HRMS spectra of epoxides 5 and 6**  
**Methyl 2,3-anhydro- $\alpha$ -D-glucopyranoside (5)**

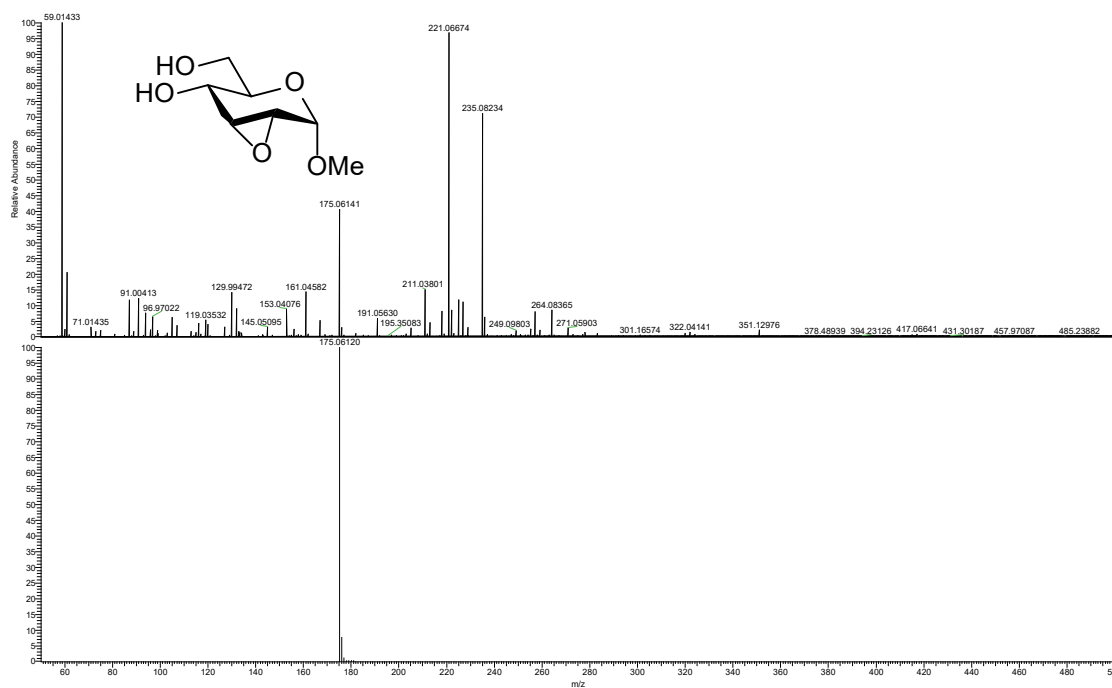

NL:  
 4.91E6  
 NR887\_22102009430  
 862.24 RT: 0.01-0.63  
 AV: 23 T: FTMS - p  
 ES(Full.ms  
 [50.00-500.00])

NL:  
 9.15E5  
 C7 H11 O5  
 C7 H11 O5  
 pa Chrg -1

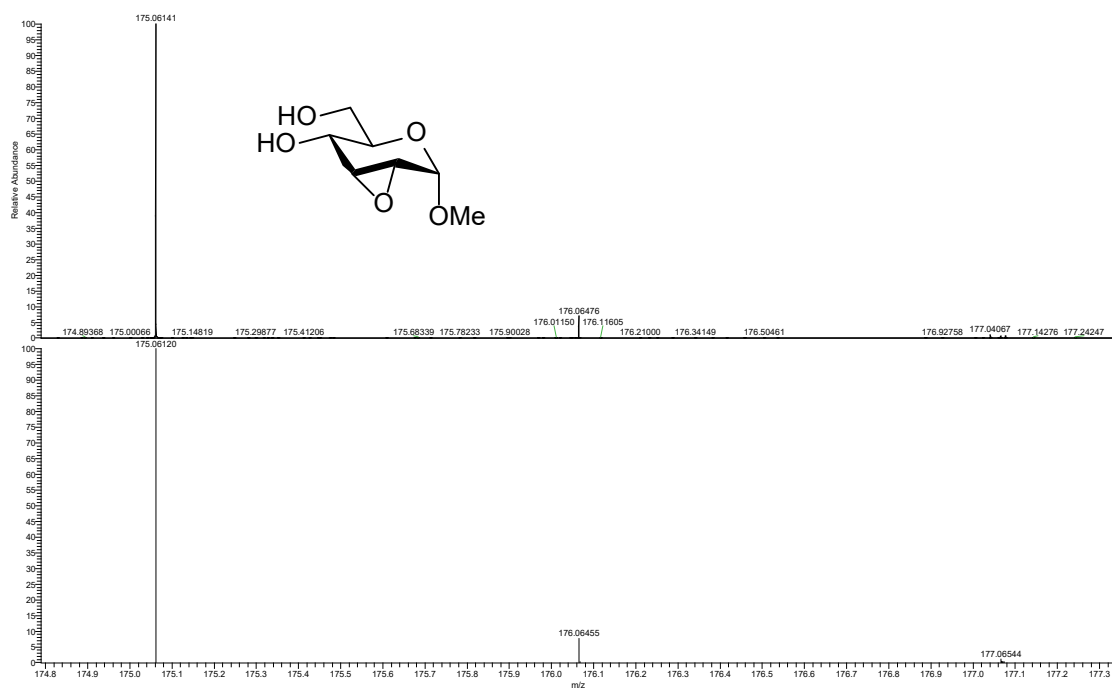

NL:  
 1.95E6  
 NR887\_22102009430  
 862.24 RT: 0.01-0.63  
 AV: 23 T: FTMS - p  
 ES(Full.ms  
 [50.00-500.00])

NL:  
 9.15E5  
 C7 H11 O5  
 C7 H11 O5  
 pa Chrg -1

### 4-tert-butylbenzyl-2,3-anhydro- $\alpha$ -D-maltoside (6)

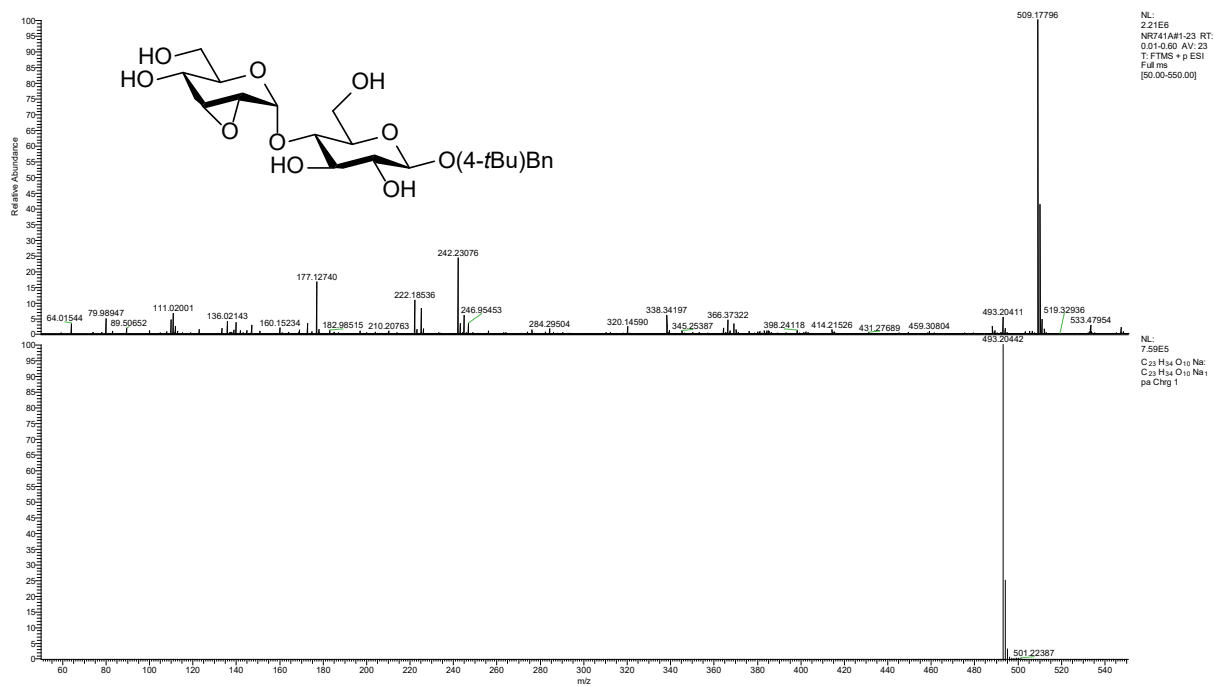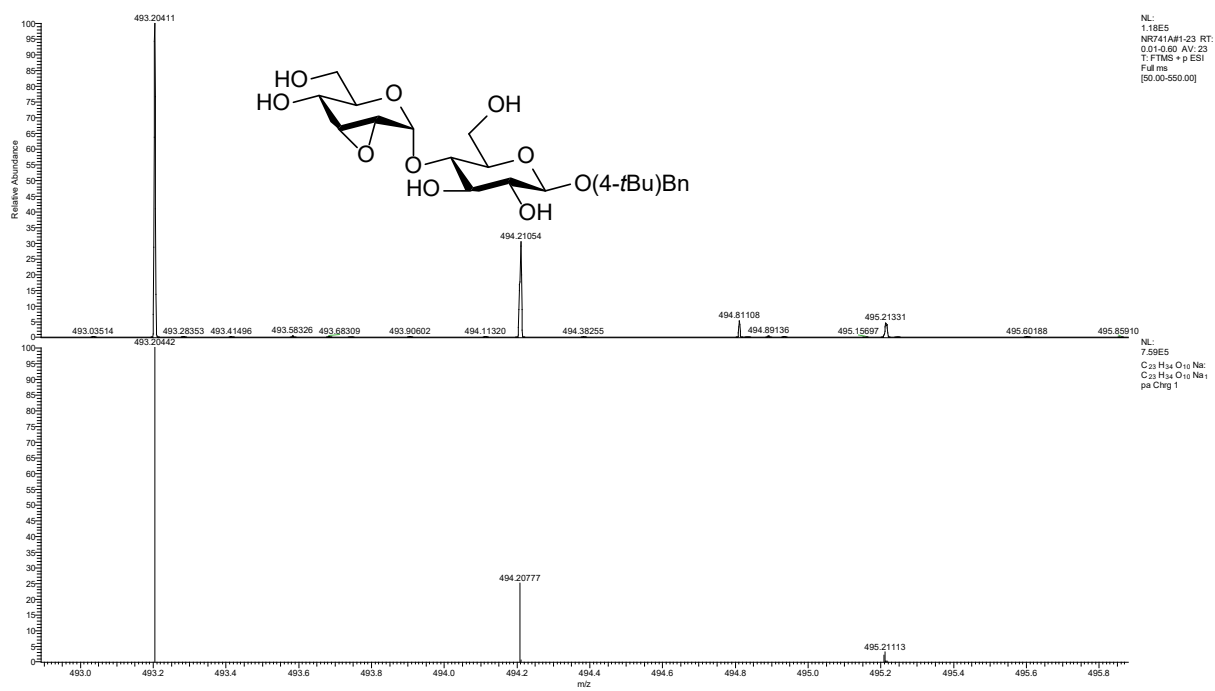

# HRMS spectra of $\alpha$ -Glc derivatives

## Methyl 3-S-phenyl-3-deoxy- $\alpha$ -D-allo/glucofuranoside (3b)

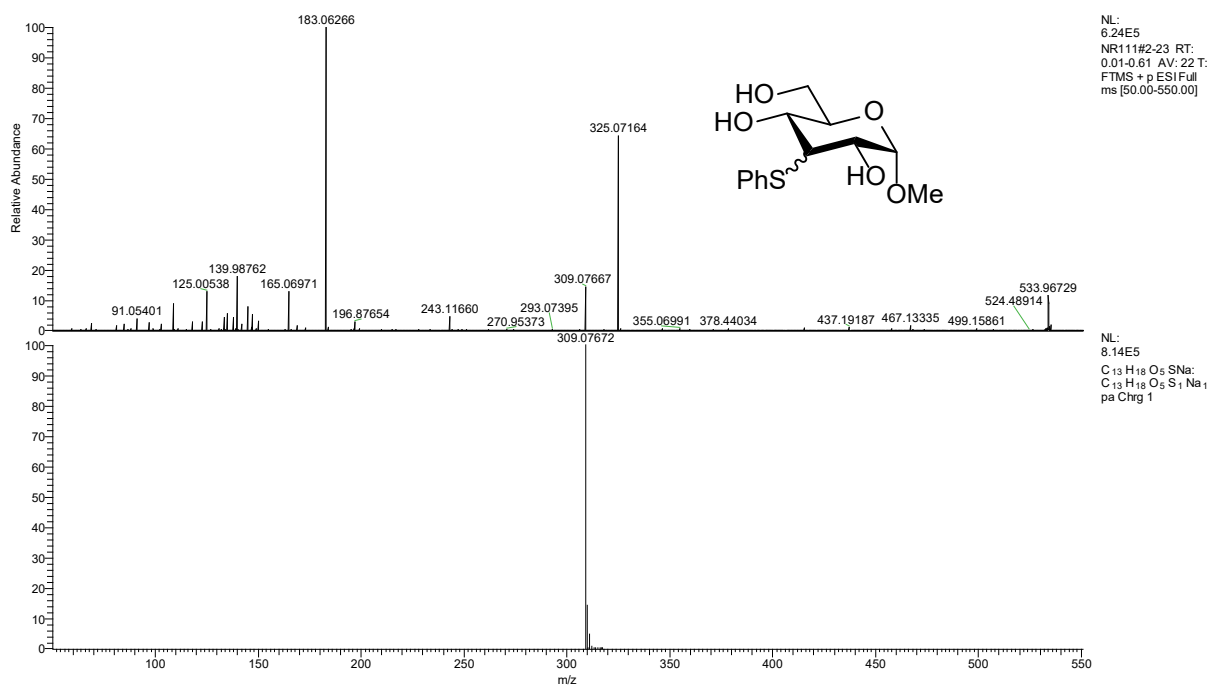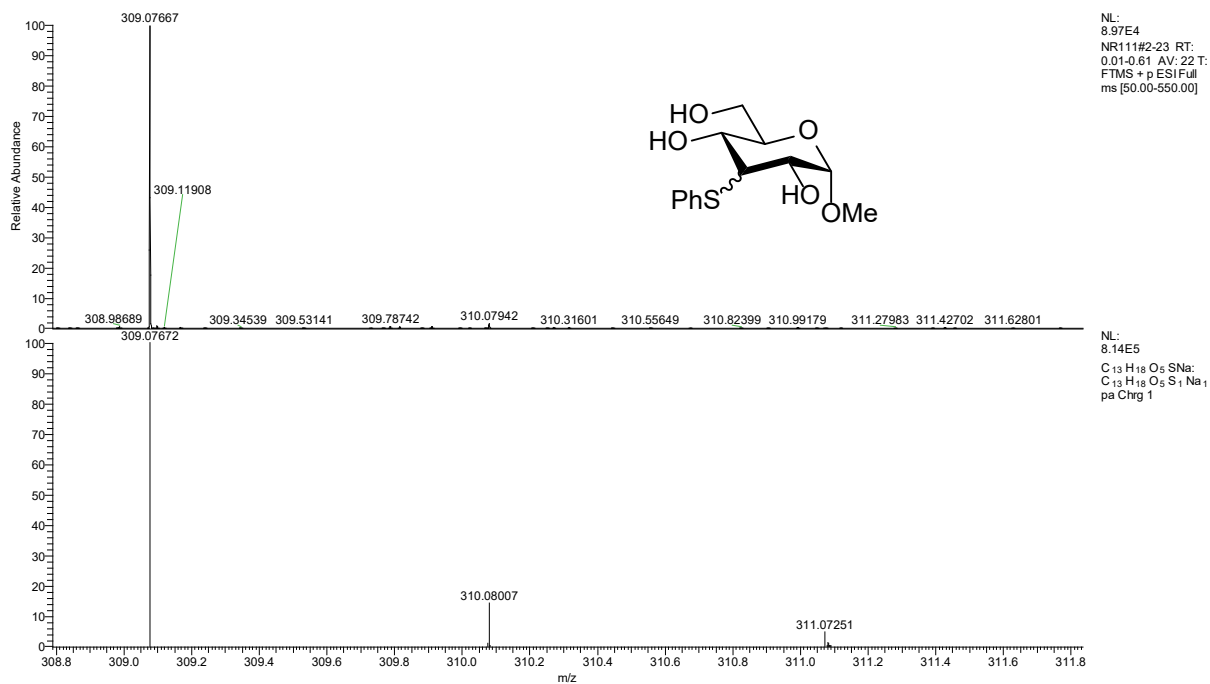

# Methyl 3-S-benzyl-3-deoxy- $\alpha$ -D-allo-glucopyranoside (3c)

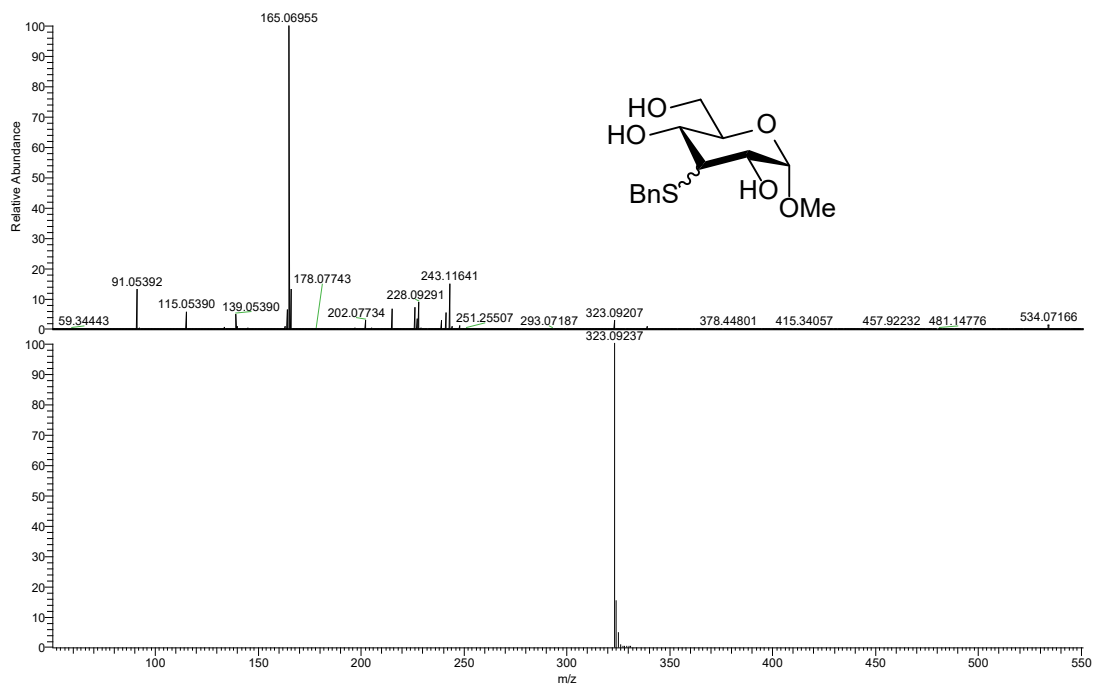

NL:  
7.13E6  
NR125#2-23 RT:  
0.02-0.60 AV: 22 T:  
FTMS + p ESI Full  
ms [50.00-550.00]

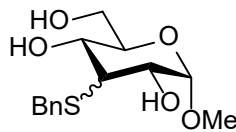

NL:  
8.05E5  
C<sub>14</sub>H<sub>20</sub>O<sub>5</sub> SNa:  
C<sub>14</sub>H<sub>20</sub>O<sub>5</sub> S<sub>1</sub> Na<sub>1</sub>  
pa Chrg 1

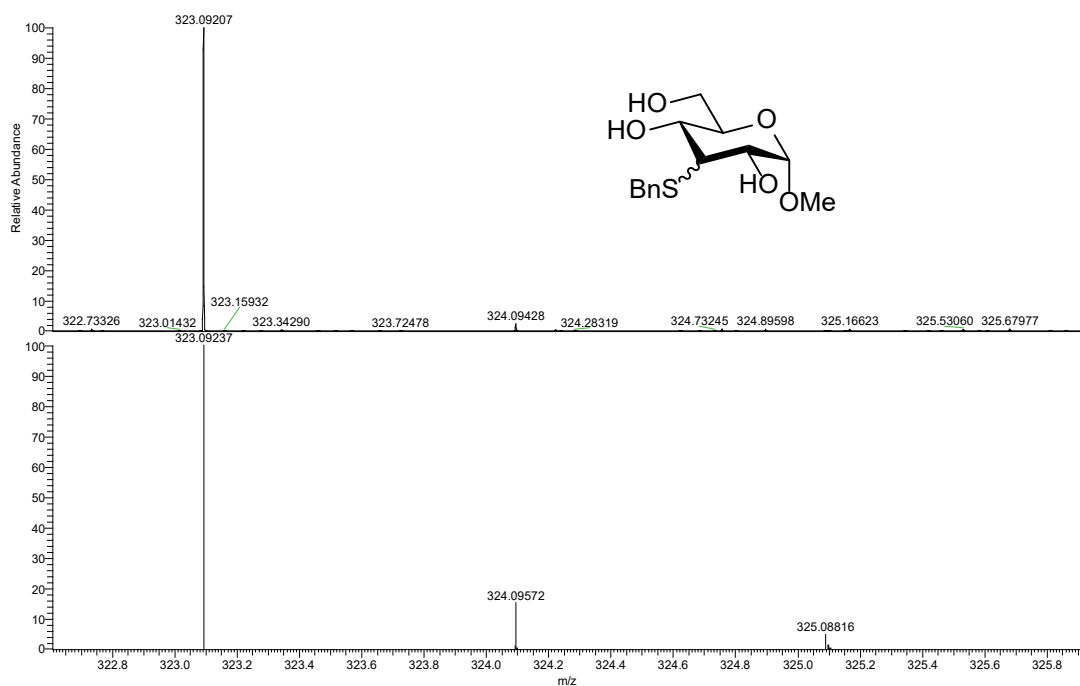

NL:  
2.14E5  
NR125#2-23 RT:  
0.02-0.60 AV: 22 T:  
FTMS + p ESI Full  
ms [50.00-550.00]

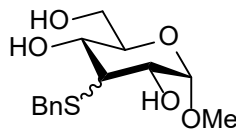

NL:  
8.05E5  
C<sub>14</sub>H<sub>20</sub>O<sub>5</sub> SNa:  
C<sub>14</sub>H<sub>20</sub>O<sub>5</sub> S<sub>1</sub> Na<sub>1</sub>  
pa Chrg 1

# HRMS spectra of Xyl derivatives

## Methyl 3-deoxy-3-S-ethyl- $\alpha$ -D-ribose/xylopyranoside (8a)

Equatorial/axial mix:

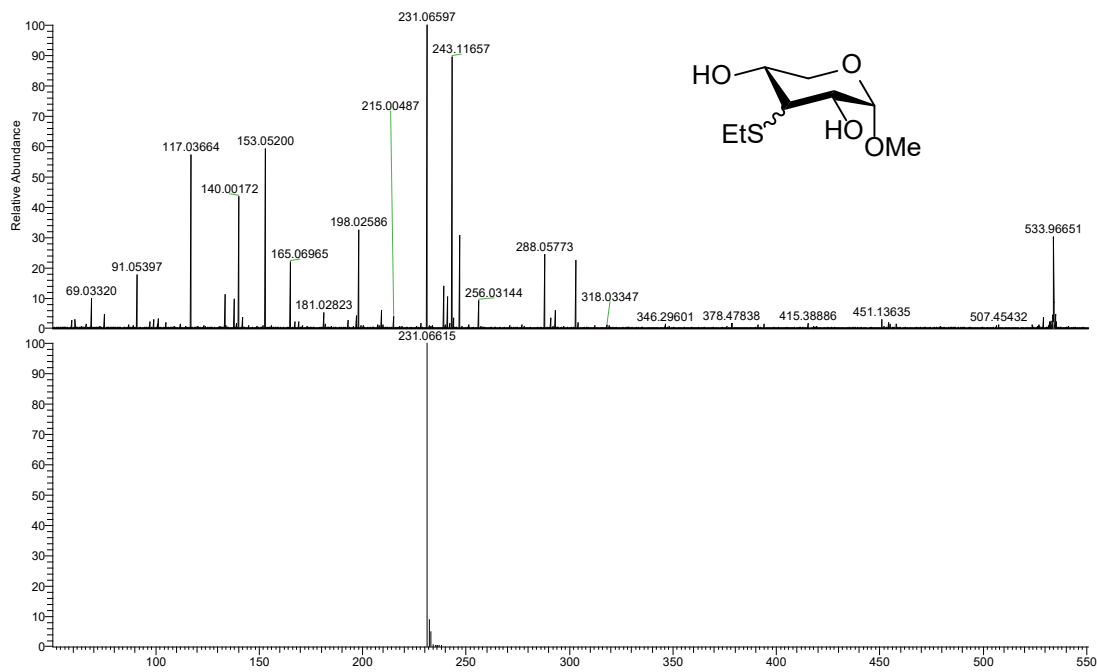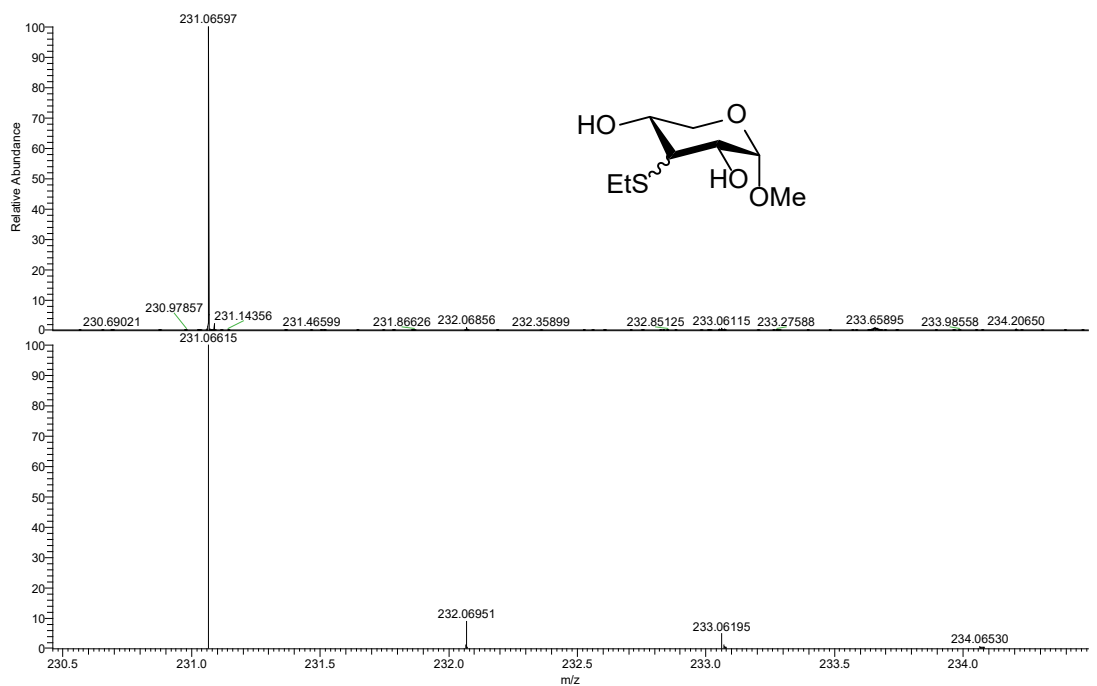

Axial:

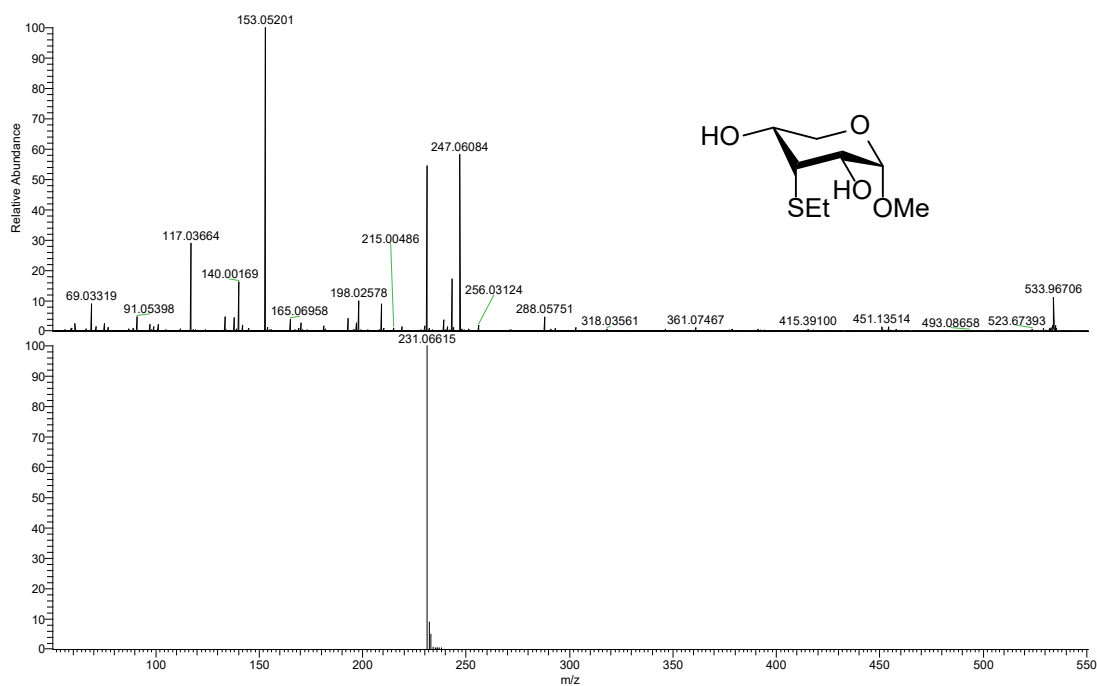

NL:  
6.58E5  
NR235C#2-23 RT:  
0.01-0.61 AV: 22  
T: FTMS + p ESI  
Full ms  
[50.00-550.00]

NL:  
8.61E5  
C<sub>8</sub>H<sub>16</sub>O<sub>4</sub> SNa:  
C<sub>8</sub>H<sub>16</sub>O<sub>4</sub> S<sub>1</sub> Na<sub>1</sub>  
pa Chrg 1

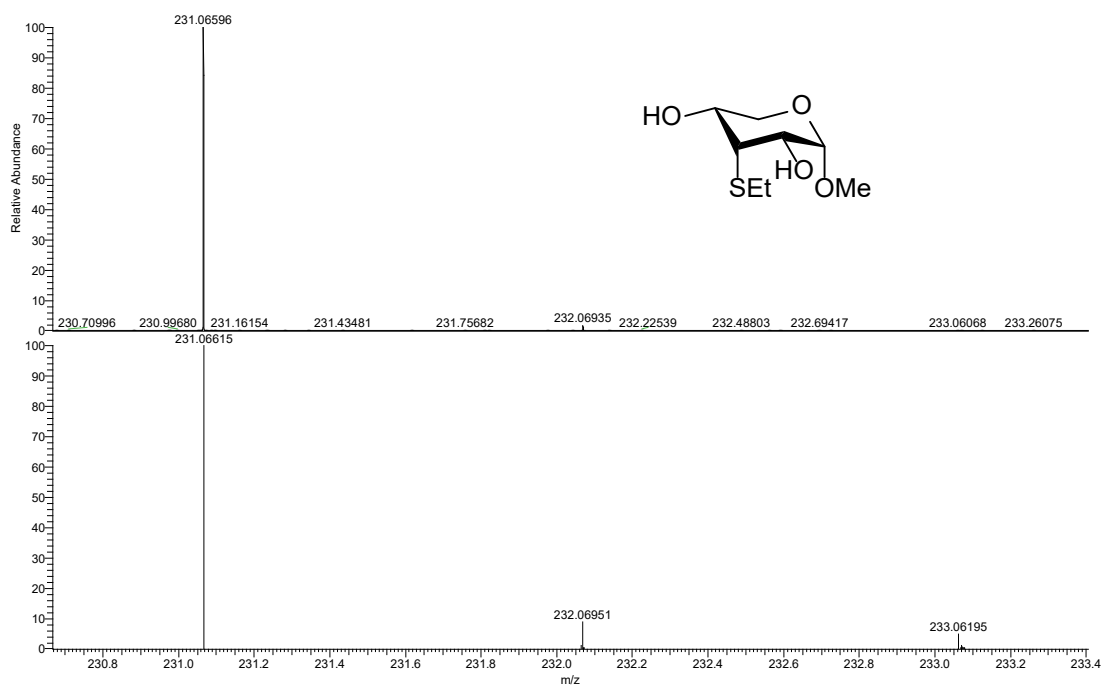

NL:  
3.58E5  
NR235C#2-23 RT:  
0.01-0.61 AV: 22  
T: FTMS + p ESI  
Full ms  
[50.00-550.00]

NL:  
8.61E5  
C<sub>8</sub>H<sub>16</sub>O<sub>4</sub> SNa:  
C<sub>8</sub>H<sub>16</sub>O<sub>4</sub> S<sub>1</sub> Na<sub>1</sub>  
pa Chrg 1

# Methyl 3-S-benzyl-3-deoxy- $\alpha$ -D-ribose/xylopyranoside (8b)

Equatorial:

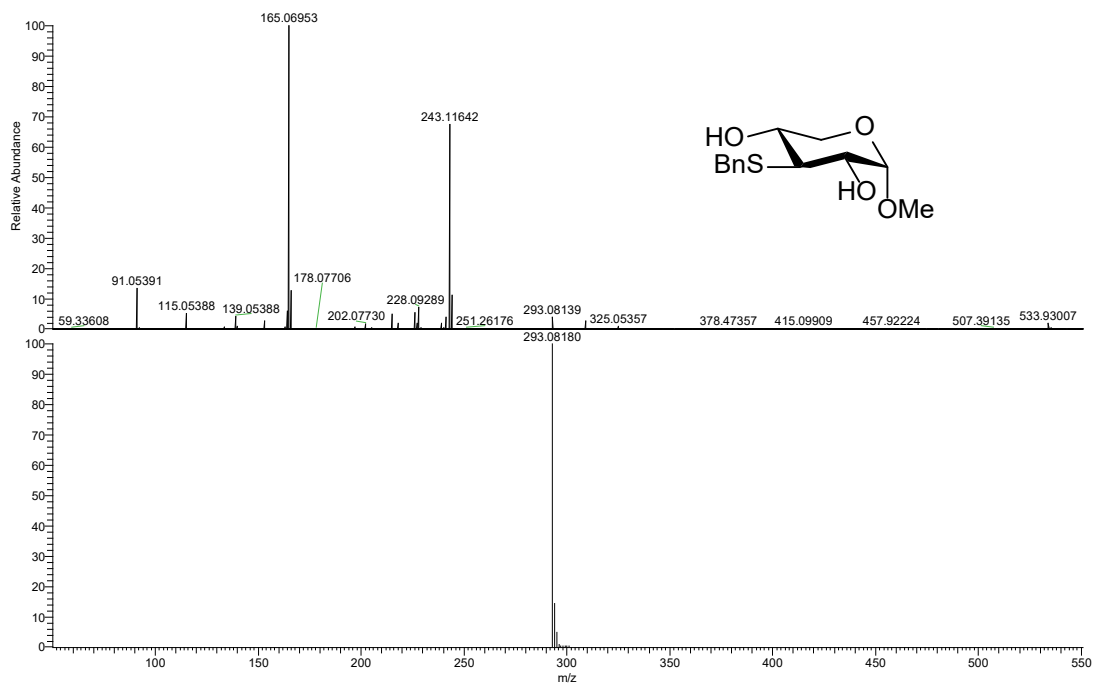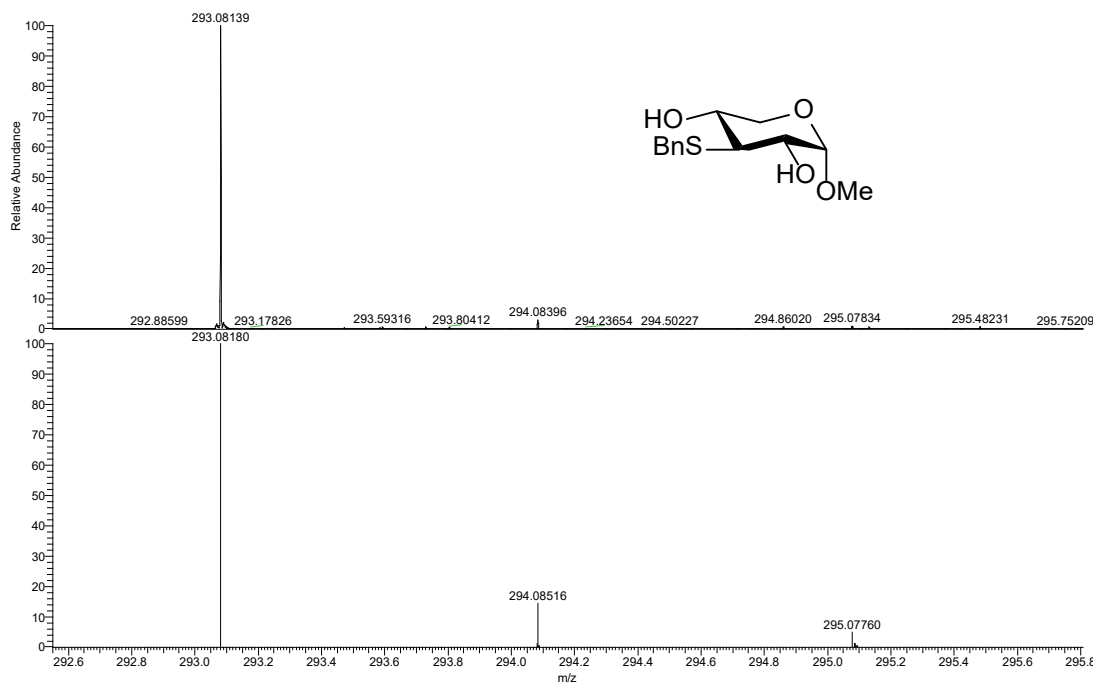



Axial:

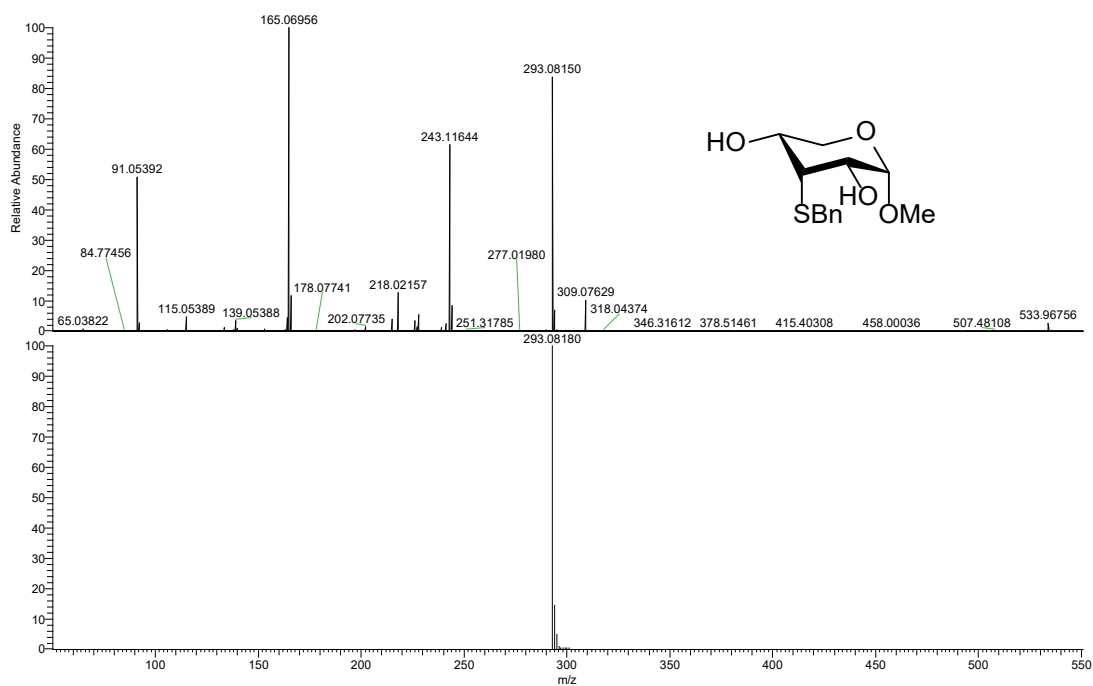

NL:  
6.28E6  
NR230B#2-23 RT:  
0.01-0.60 AV: 22 T:  
FTMS + p ESI Full  
ms [50.00-550.00]

NL:  
8.16E5  
C<sub>13</sub>H<sub>18</sub>O<sub>4</sub>SNa:  
C<sub>13</sub>H<sub>18</sub>O<sub>4</sub>S<sub>1</sub>Na<sub>1</sub>  
pa Chrg 1

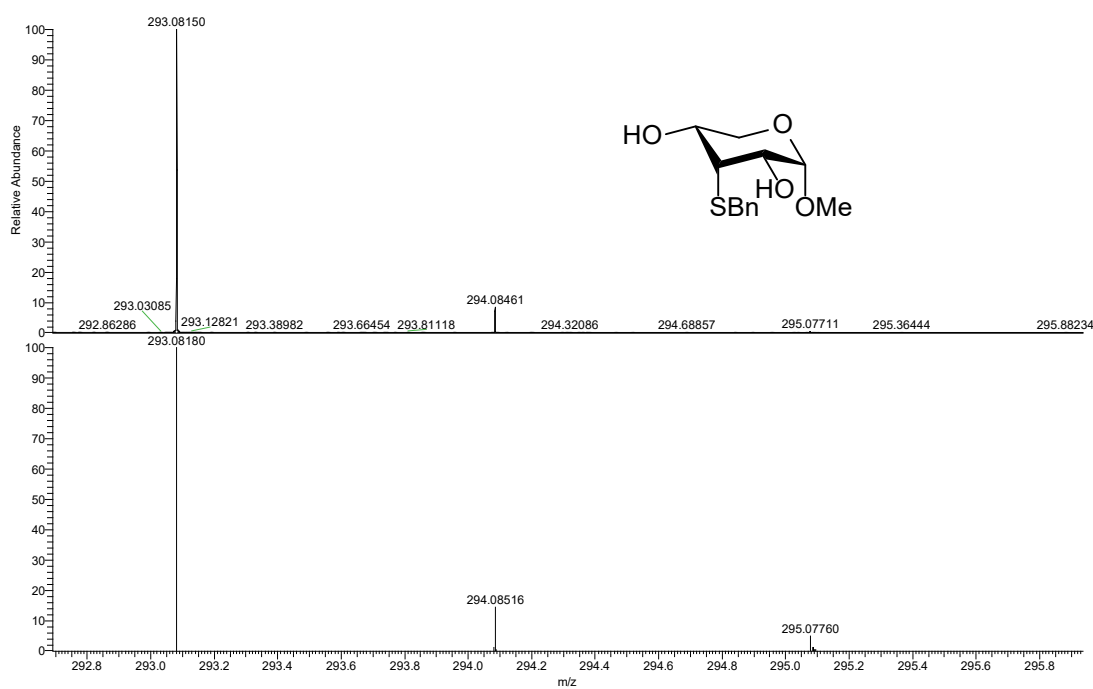

NL:  
5.27E6  
NR230B#2-23 RT:  
0.01-0.60 AV: 22 T:  
FTMS + p ESI Full  
ms [50.00-550.00]

NL:  
8.16E5  
C<sub>13</sub>H<sub>18</sub>O<sub>4</sub>SNa:  
C<sub>13</sub>H<sub>18</sub>O<sub>4</sub>S<sub>1</sub>Na<sub>1</sub>  
pa Chrg 1

### Methyl 3-S-acetyl-3-deoxy- $\alpha$ -D-ribo/xylopyranoside (8c)

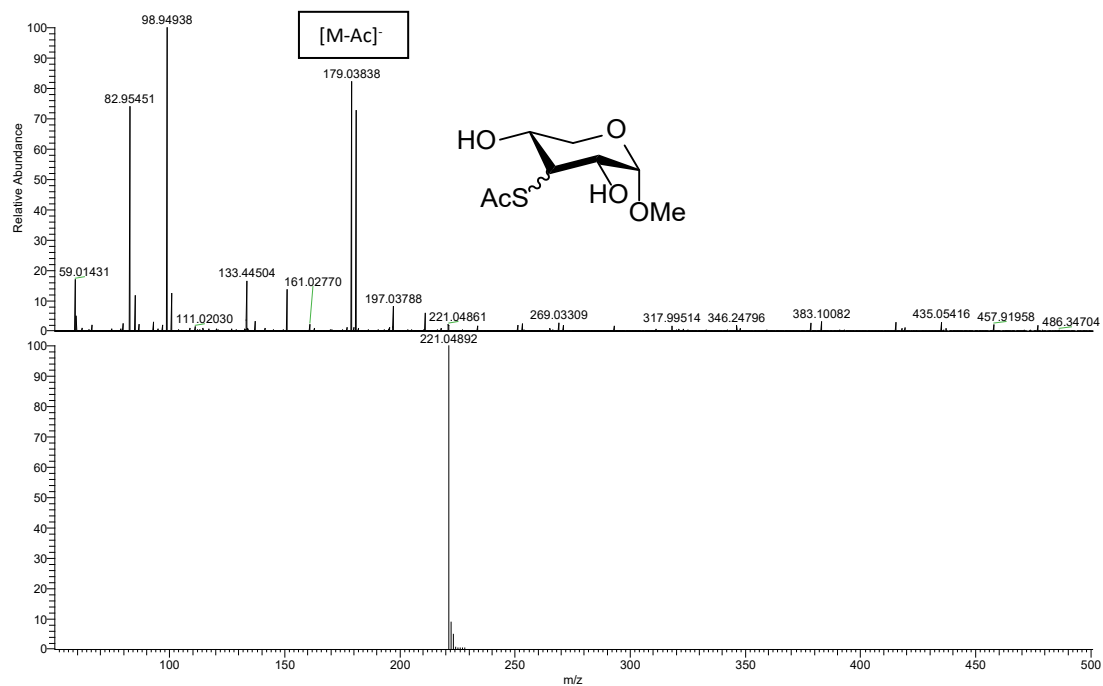

NL:  
2.98E5  
NR234C#2-24  
RT: 0.01-0.63 AV:  
23 T: FTMS - p ESI  
Full ms  
[50.00-500.00]

NL:  
8.59E5  
C<sub>8</sub>H<sub>13</sub>O<sub>5</sub>S:  
C<sub>8</sub>H<sub>13</sub>O<sub>5</sub>S<sub>1</sub>  
pa Chrg -1

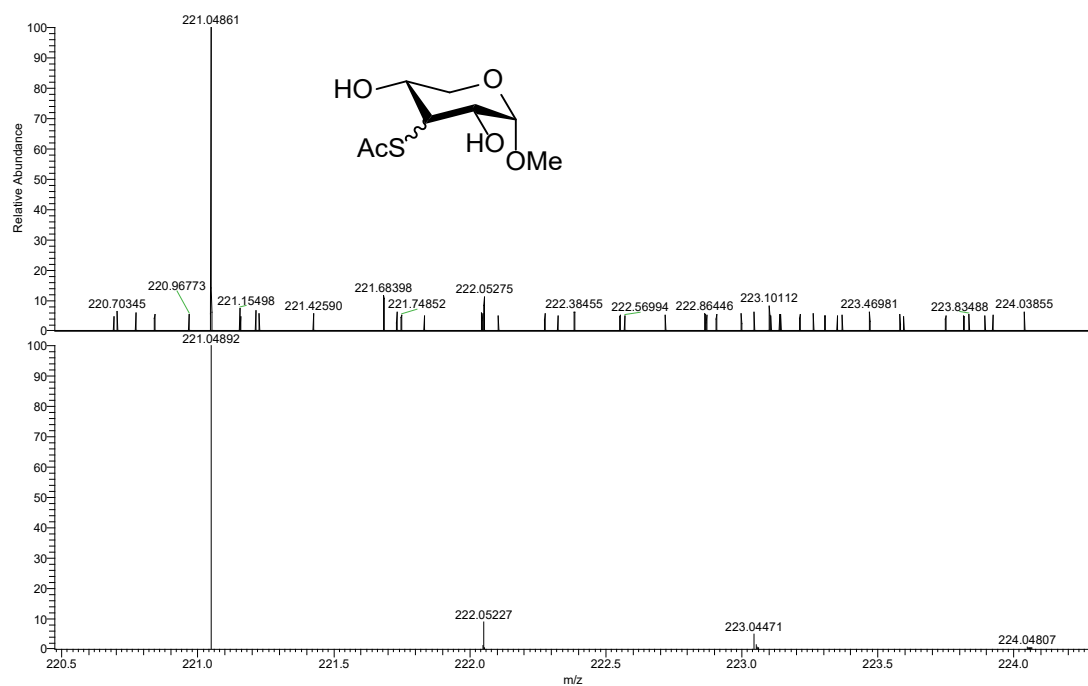

NL:  
6.20E3  
NR234C#2-24  
RT: 0.01-0.63 AV:  
23 T: FTMS - p ESI  
Full ms  
[50.00-500.00]

NL:  
8.59E5  
C<sub>8</sub>H<sub>13</sub>O<sub>5</sub>S:  
C<sub>8</sub>H<sub>13</sub>O<sub>5</sub>S<sub>1</sub>  
pa Chrg -1

# HRMS spectra of Gal derivative

## Methyl 4-S-acetyl-4-deoxy- $\alpha$ -D-galacto/gluco-pyranoside (10)

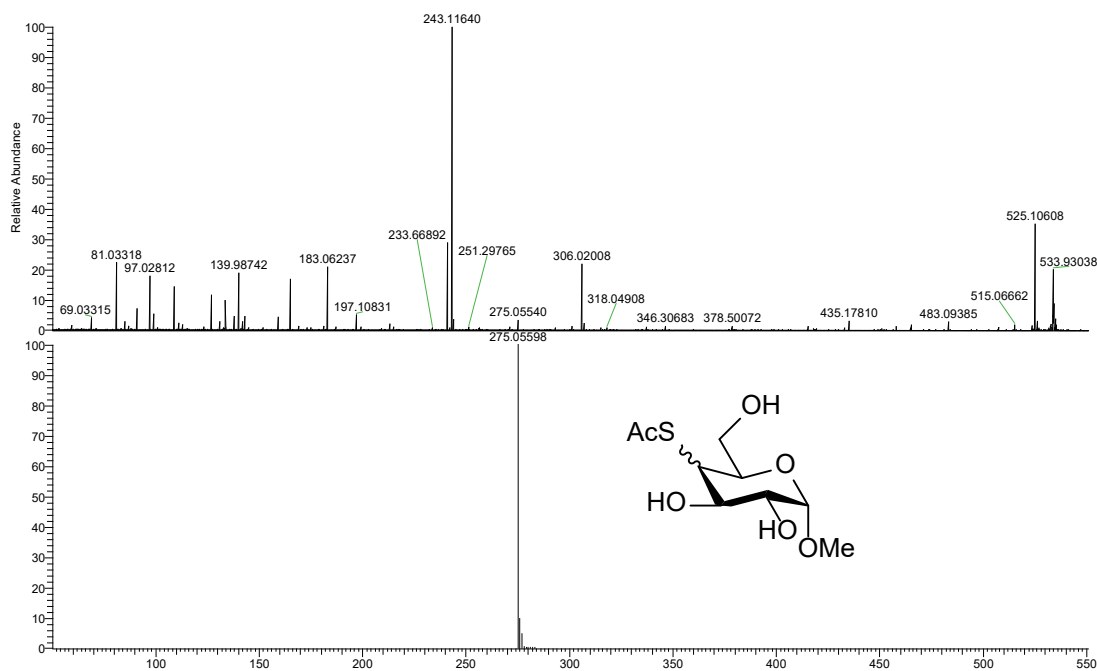

NL:  
3.97E5  
NR317B#2-23 RT:  
0.02-0.60 AV: 22  
T: FTMS + p ESI  
Full ms  
[50.00-550.00]

NL:  
8.48E5  
C<sub>9</sub>H<sub>16</sub>O<sub>6</sub> SNa:  
C<sub>9</sub>H<sub>16</sub>O<sub>6</sub> S<sub>1</sub> Na<sub>1</sub>  
pa Chrg 1

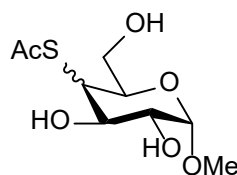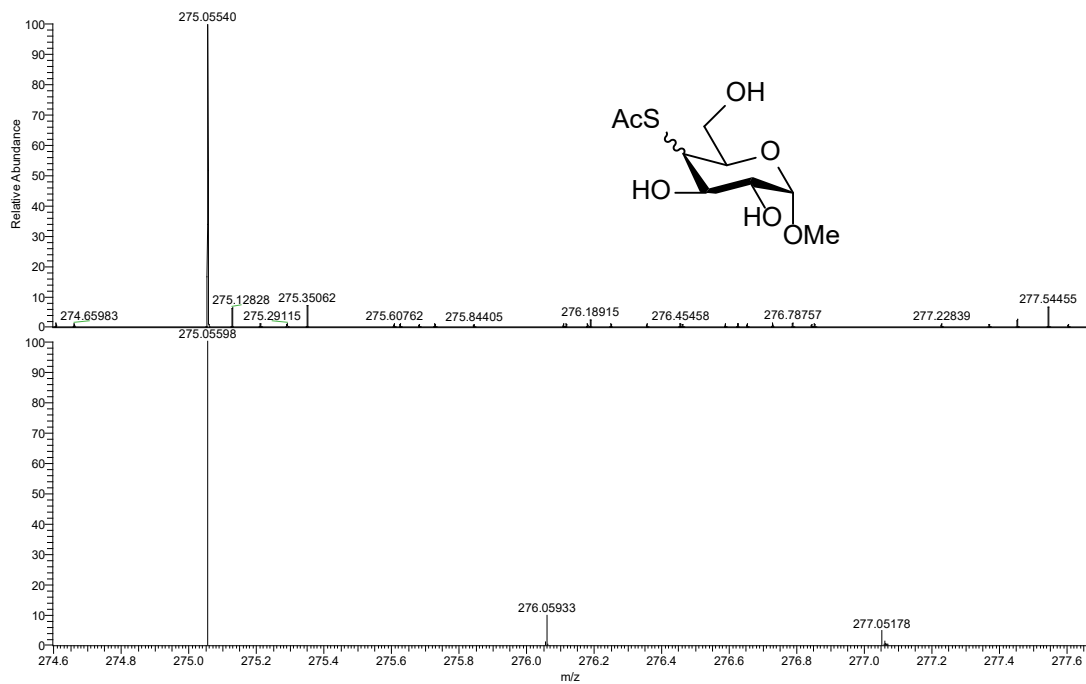

NL:  
1.33E4  
NR317B#2-23 RT:  
0.02-0.60 AV: 22  
T: FTMS + p ESI  
Full ms  
[50.00-550.00]

NL:  
8.48E5  
C<sub>9</sub>H<sub>16</sub>O<sub>6</sub> SNa:  
C<sub>9</sub>H<sub>16</sub>O<sub>6</sub> S<sub>1</sub> Na<sub>1</sub>  
pa Chrg 1

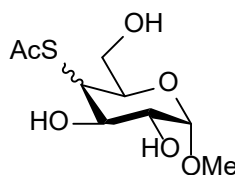

# HRMS spectra of maltose derivative

## 4-tert-butylbenzyl-3-S-benzyl-3-deoxy- $\alpha$ -D-maltoside (12)

Equatorial:

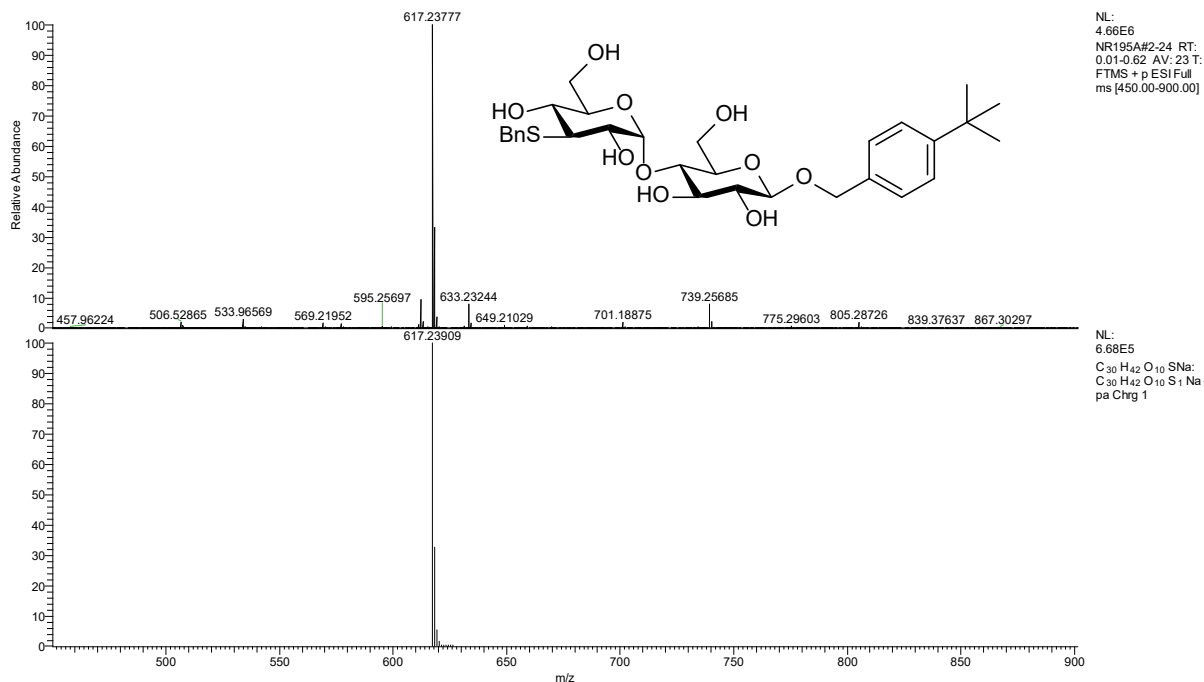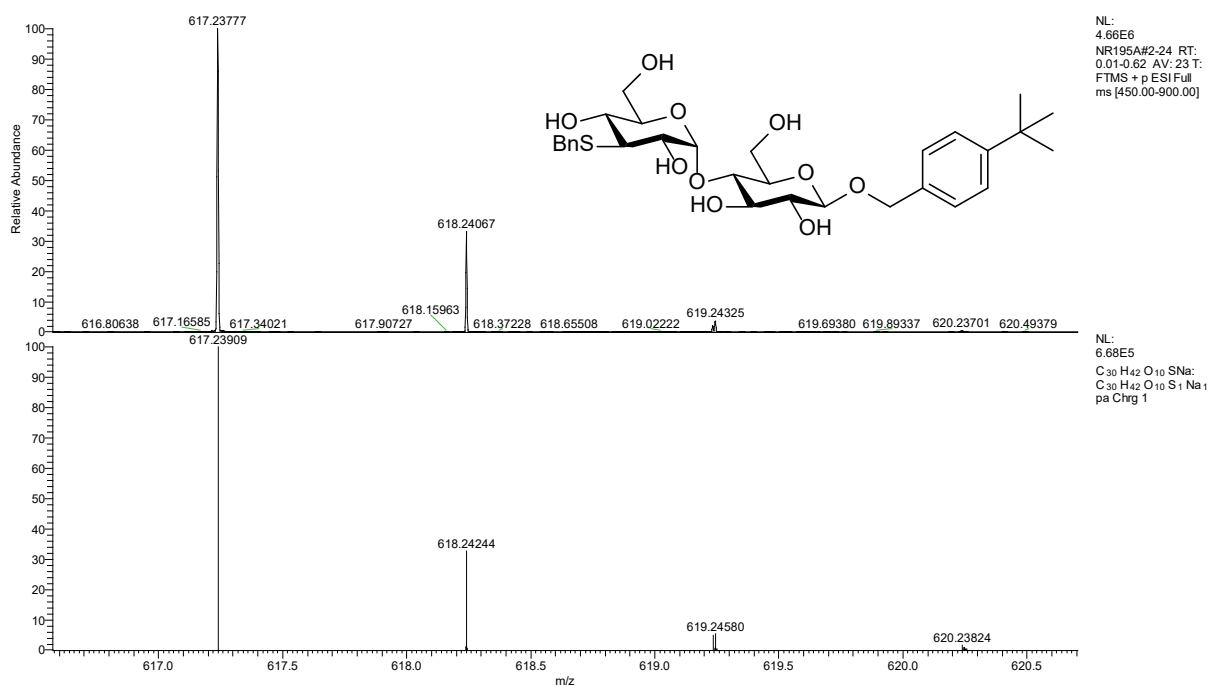

Axial:

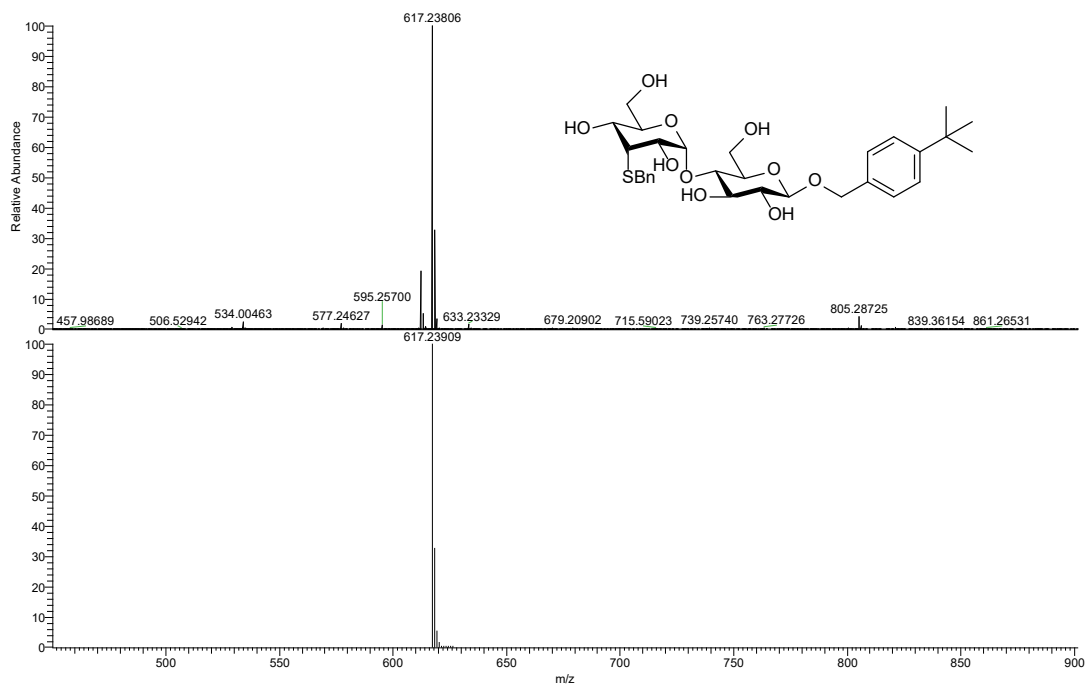

NL:  
3.27E6  
NR195B#2-24 RT:  
0.01-0.62 AV: 23 T:  
FTMS + p ESI Full  
ms [450.00-900.00]

NL:  
6.68E5  
C<sub>30</sub>H<sub>42</sub>O<sub>10</sub>SNa:  
C<sub>30</sub>H<sub>42</sub>O<sub>10</sub>S<sub>1</sub>Na<sub>1</sub>  
pa Chrg 1

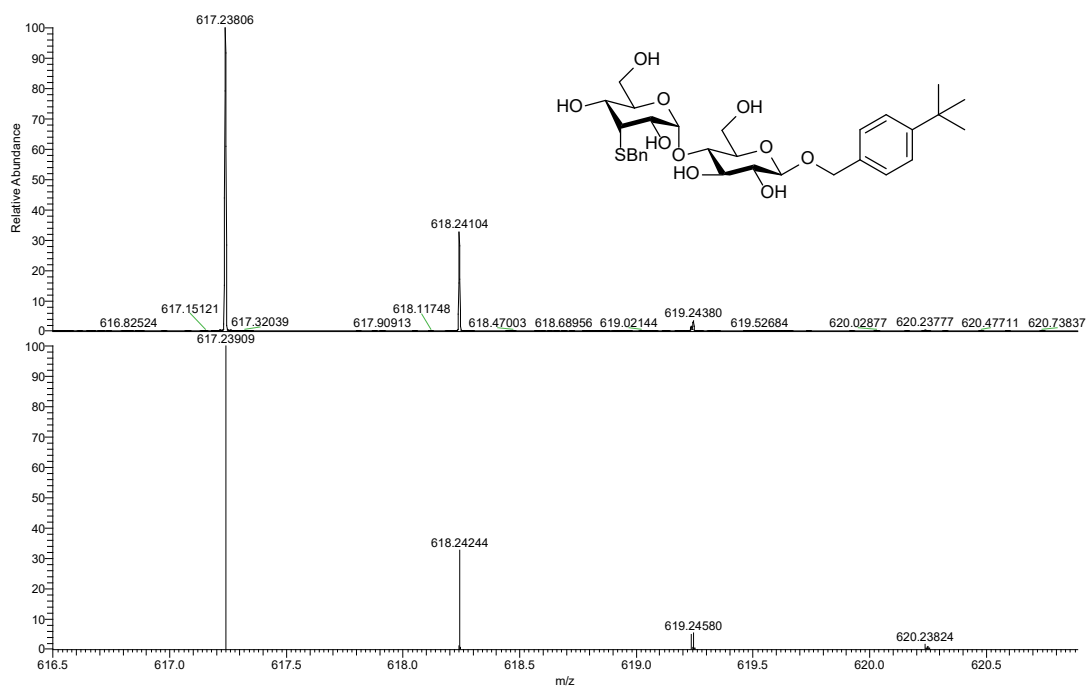

NL:  
3.27E6  
NR195B#2-24 RT:  
0.01-0.62 AV: 23 T:  
FTMS + p ESI Full  
ms [450.00-900.00]

NL:  
6.68E5  
C<sub>30</sub>H<sub>42</sub>O<sub>10</sub>SNa:  
C<sub>30</sub>H<sub>42</sub>O<sub>10</sub>S<sub>1</sub>Na<sub>1</sub>  
pa Chrg 1

# HRMS spectra of S13 and S14

## Methyl-2,4,6-O-acetyl-3-(trityl)hydrazone- $\alpha$ -D-glucopyranoside (S13)

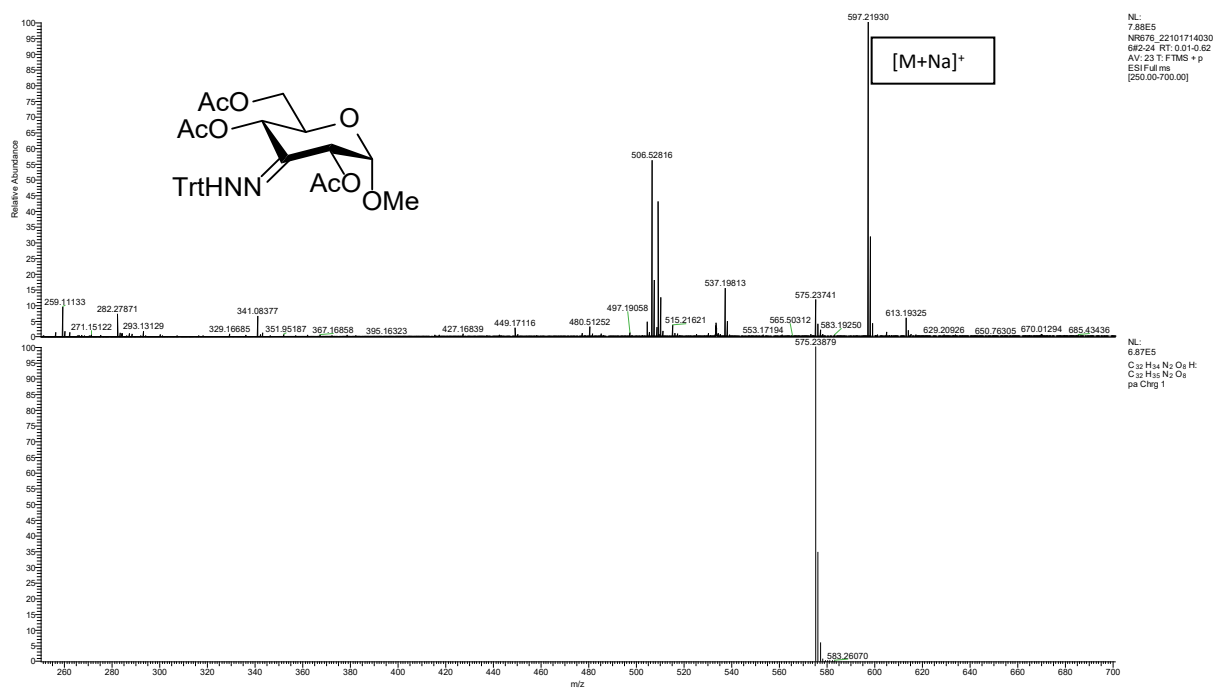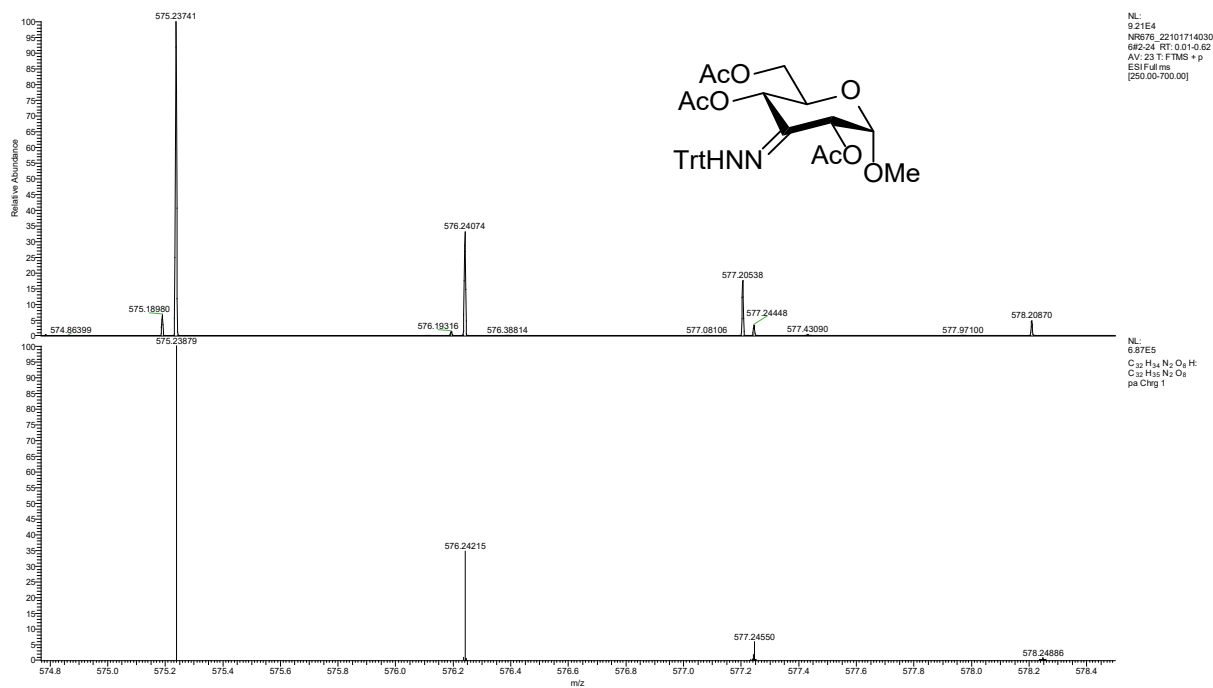

# Methyl 2,4,6-tri-O-acetyl-3-chloro-3-deoxy- $\alpha$ -D-allo/glucopyranoside (S14)

Equatorial:

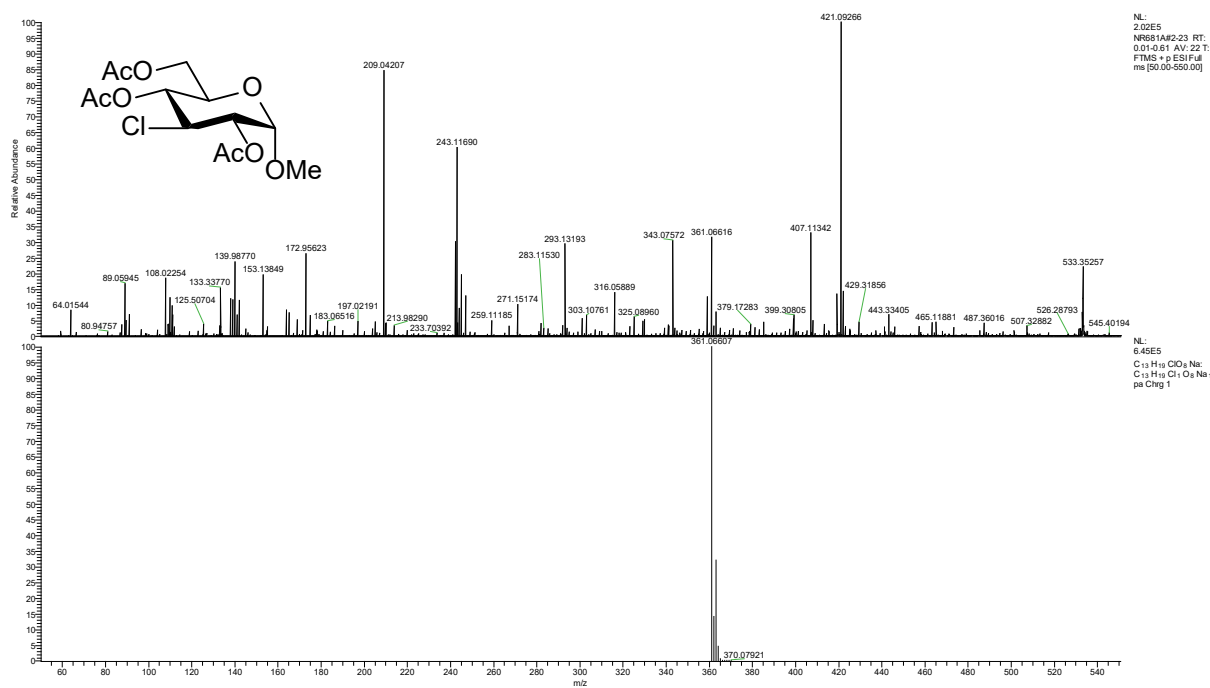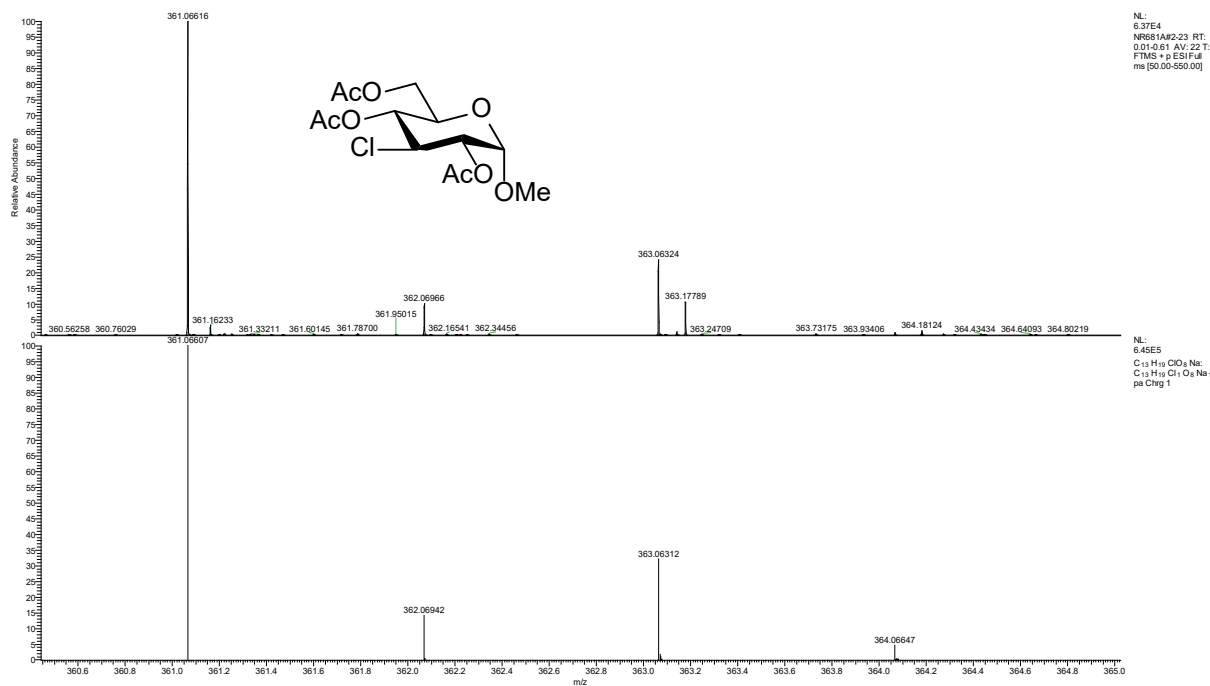

Axial:

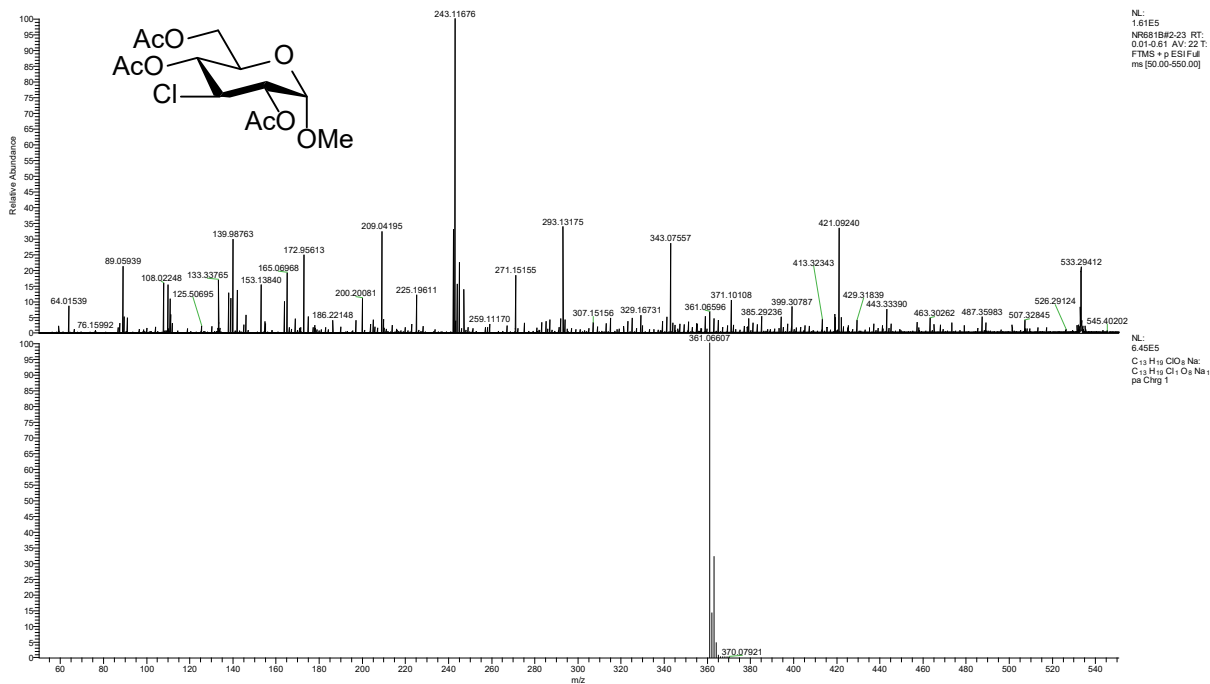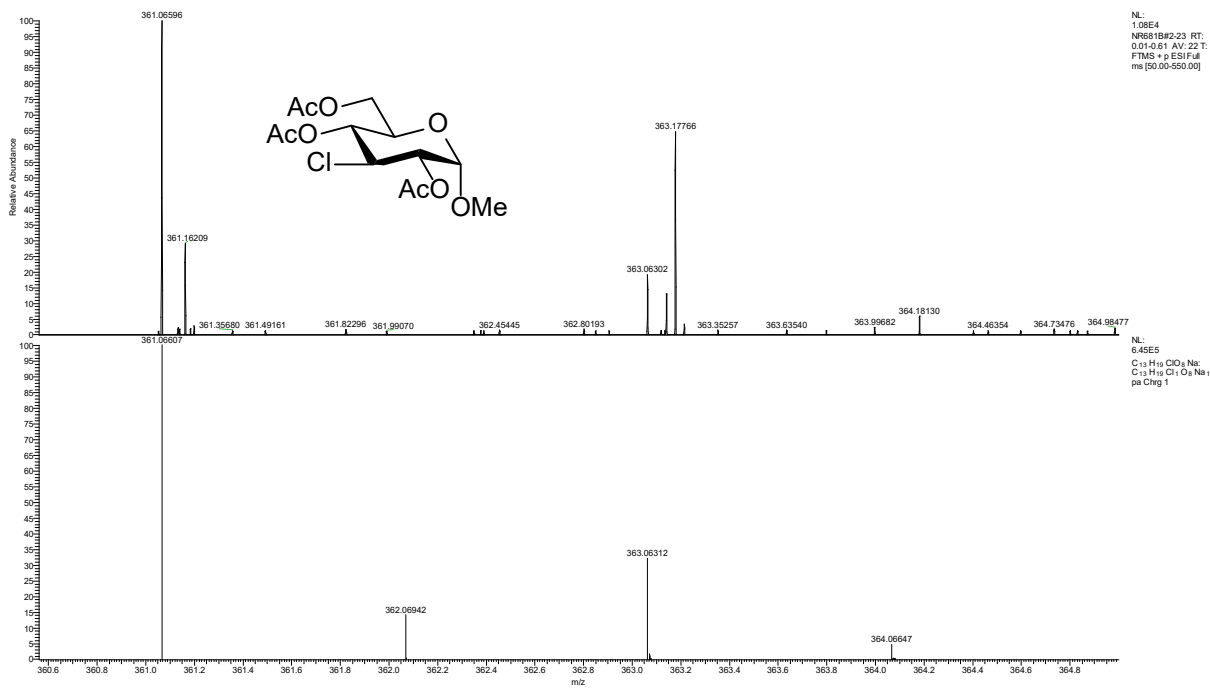



# HRMS spectra of $\beta$ -Glc derivative

## Methyl 3-S-benzyl-3-deoxy- $\beta$ -D-allo/glucofuranoside (14)

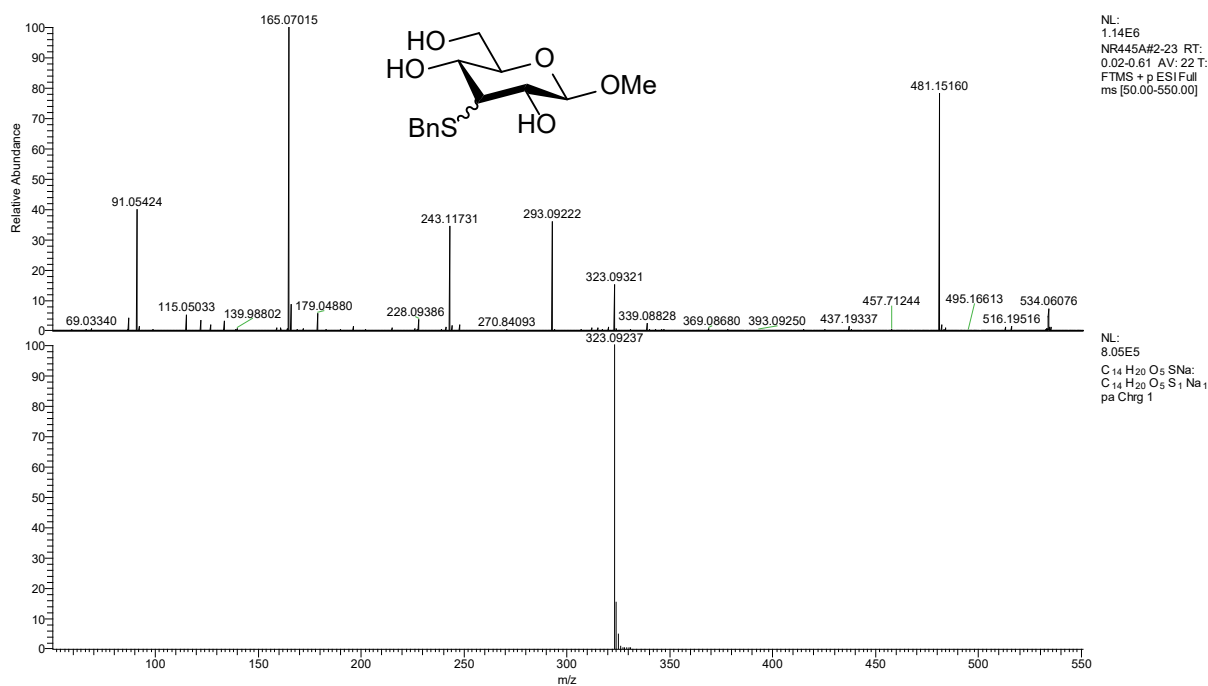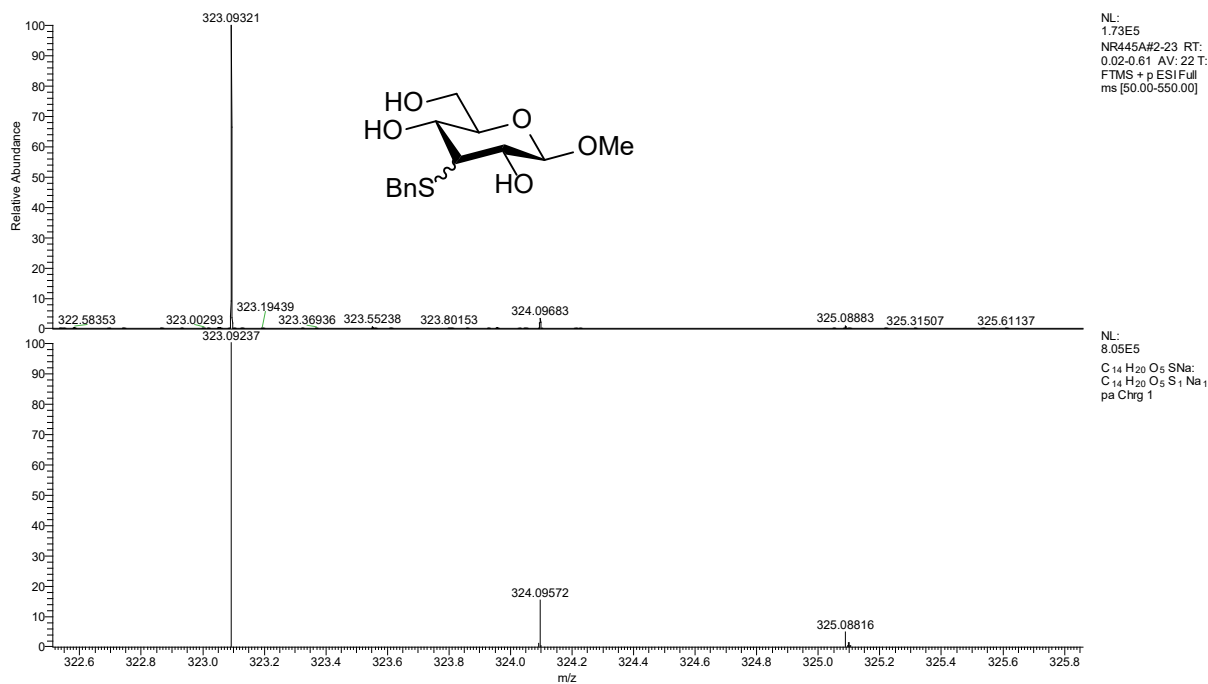

# HRMS of S16, S17, and S-glycosides 20 and 22

## Methyl 2,3,4,6-tri-O-acetyl-3-S-acetyl-3-deoxy- $\alpha$ -D-glucopyranoside (S16)

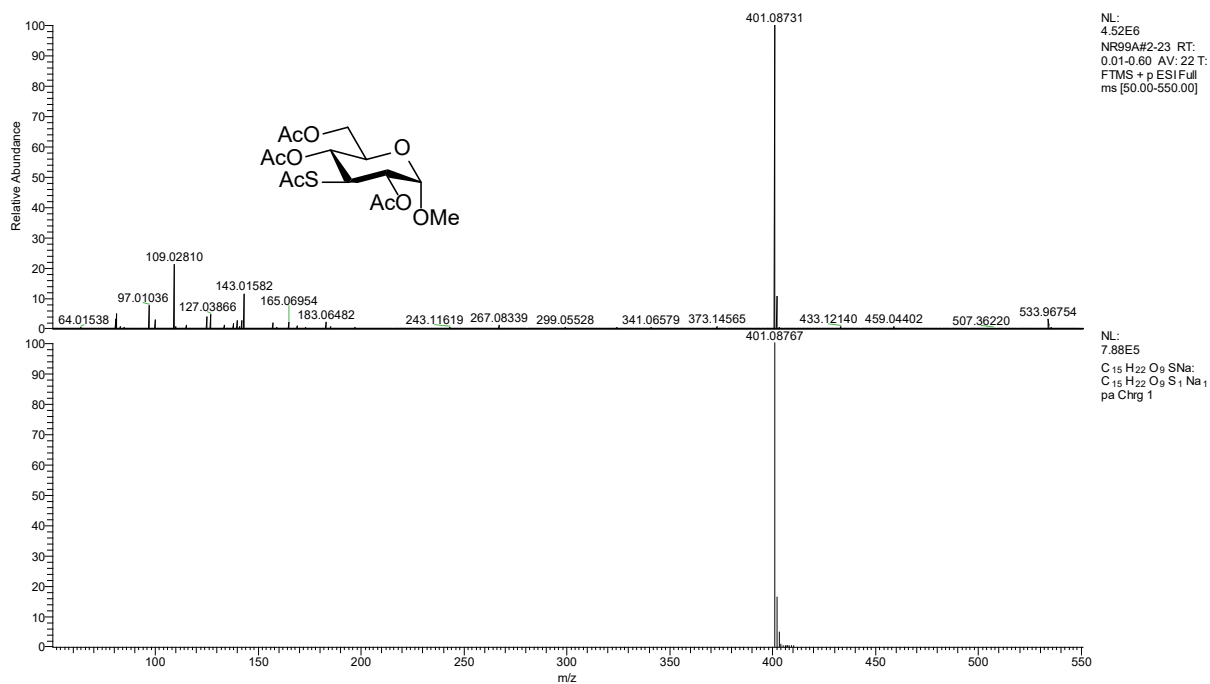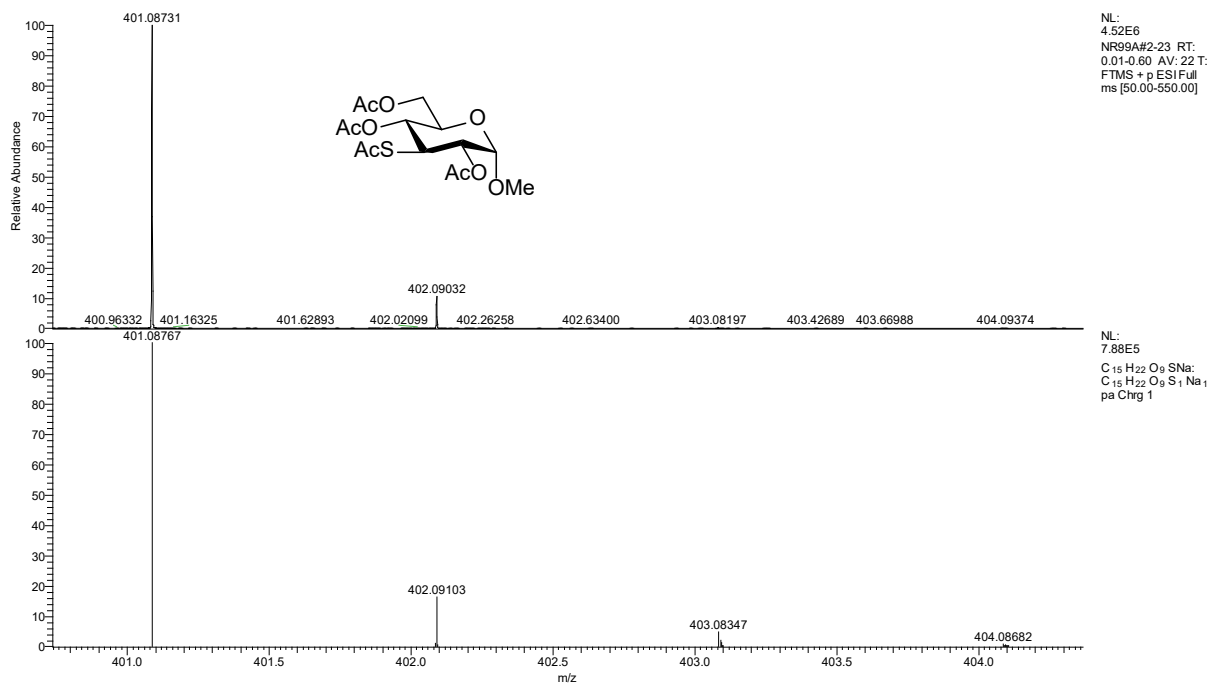

# Methyl 2,3,4,6-tri-O-acetyl-3-S-acetyl-3-deoxy- $\alpha$ -D-allopyranoside (S17)

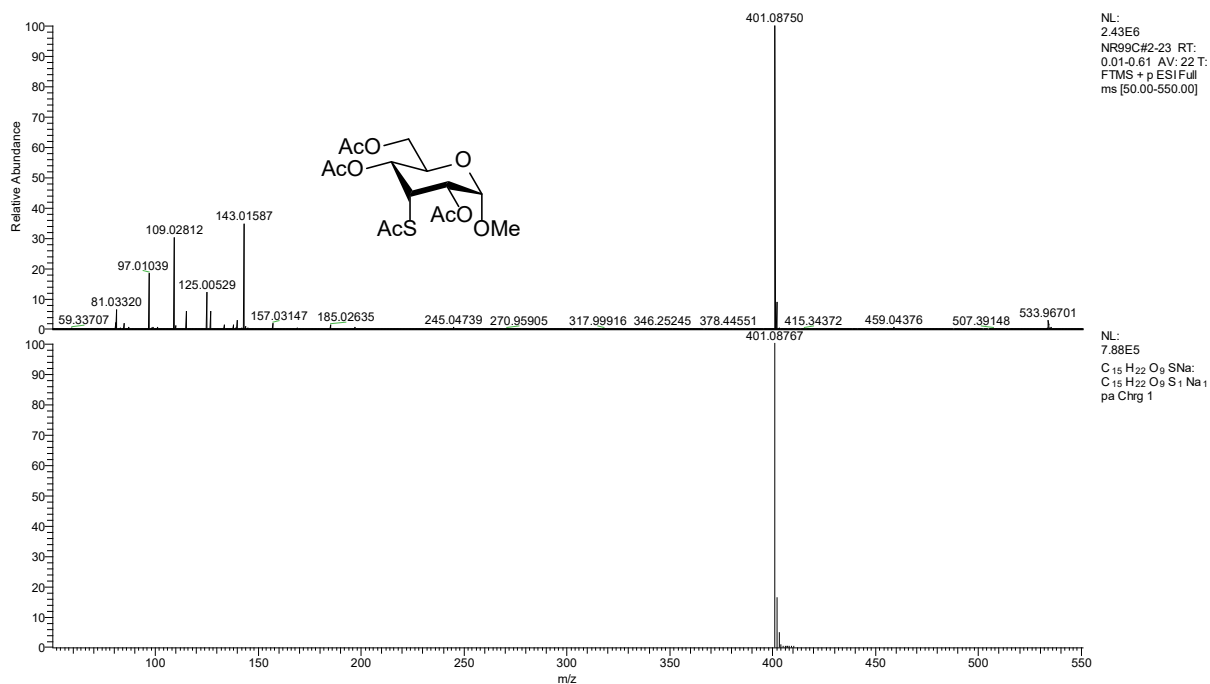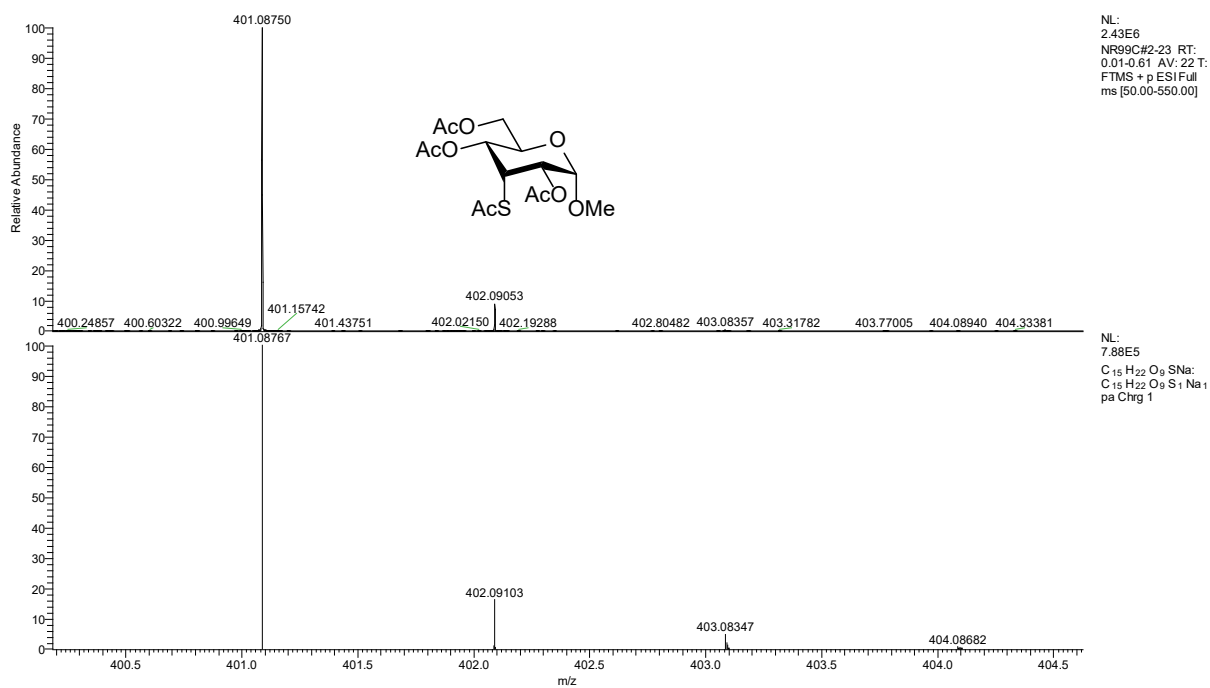

# Methyl 3-S-β-D-glucopyranosyl-3-deoxy-3-thio-α-D-glucopyranoside (20)

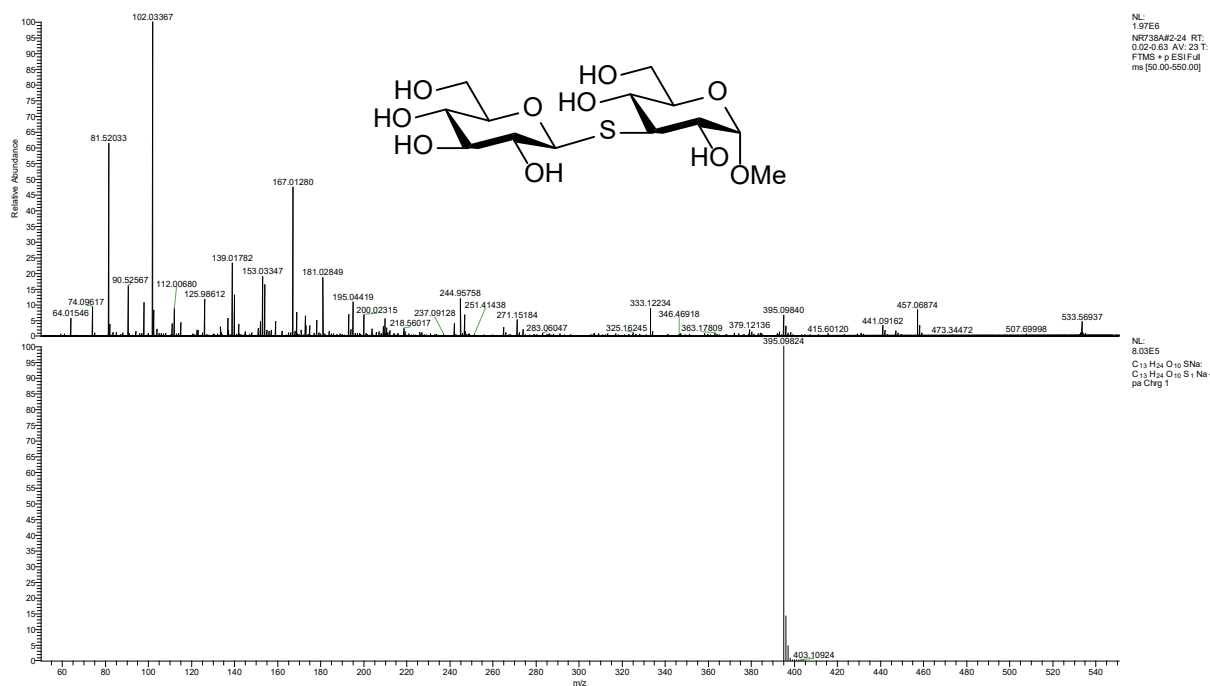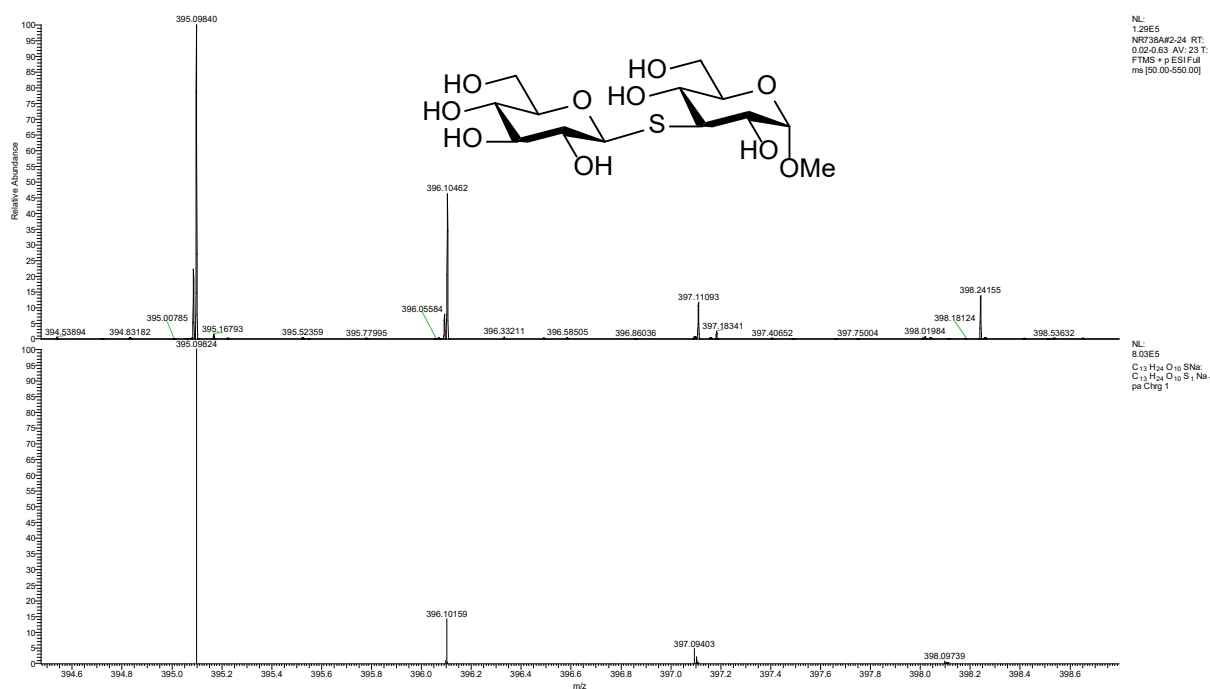

# Methyl 3-S-β-D-glucopyranosyl-3-deoxy-3-thio-α-D-allopyranoside (22)

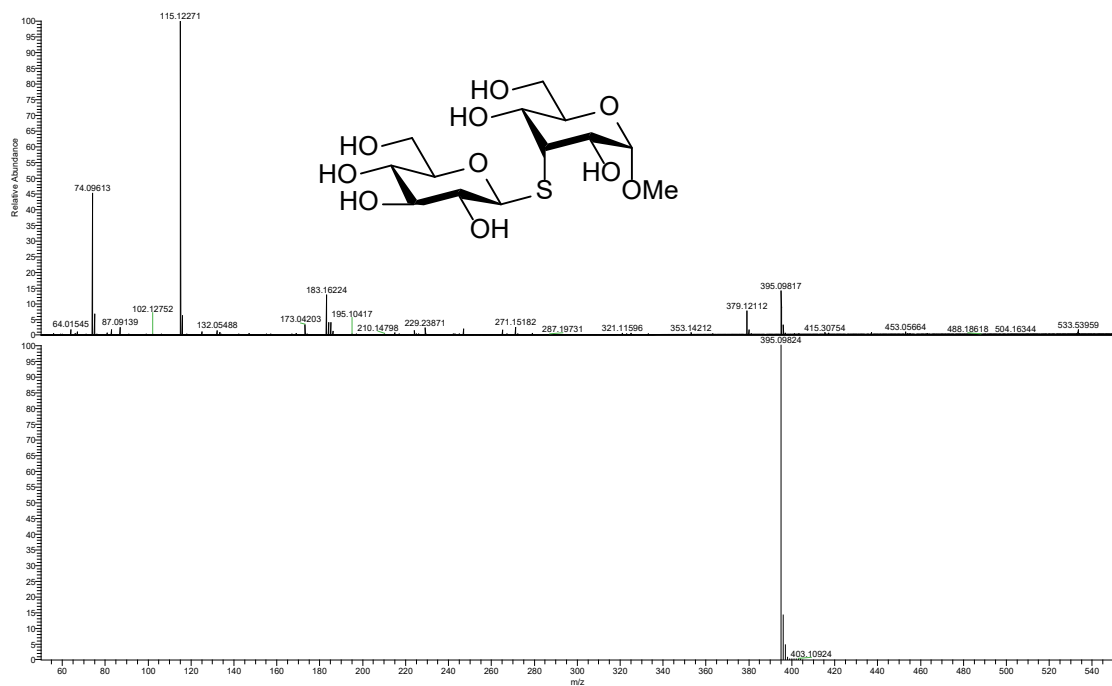

NL:  
 3.30E6  
 NR739A\_2301311026  
 S562-23 RT:  
 0.01-0.60 AV: 22 T:  
 FTMS + p ESI Full ms  
 [50.00-550.00]

NL:  
 8.03E5  
 C<sub>13</sub>H<sub>24</sub>O<sub>10</sub> SNa:  
 C<sub>13</sub>H<sub>24</sub>O<sub>10</sub> S<sub>1</sub> Na<sub>1</sub>  
 p4 Chg 1

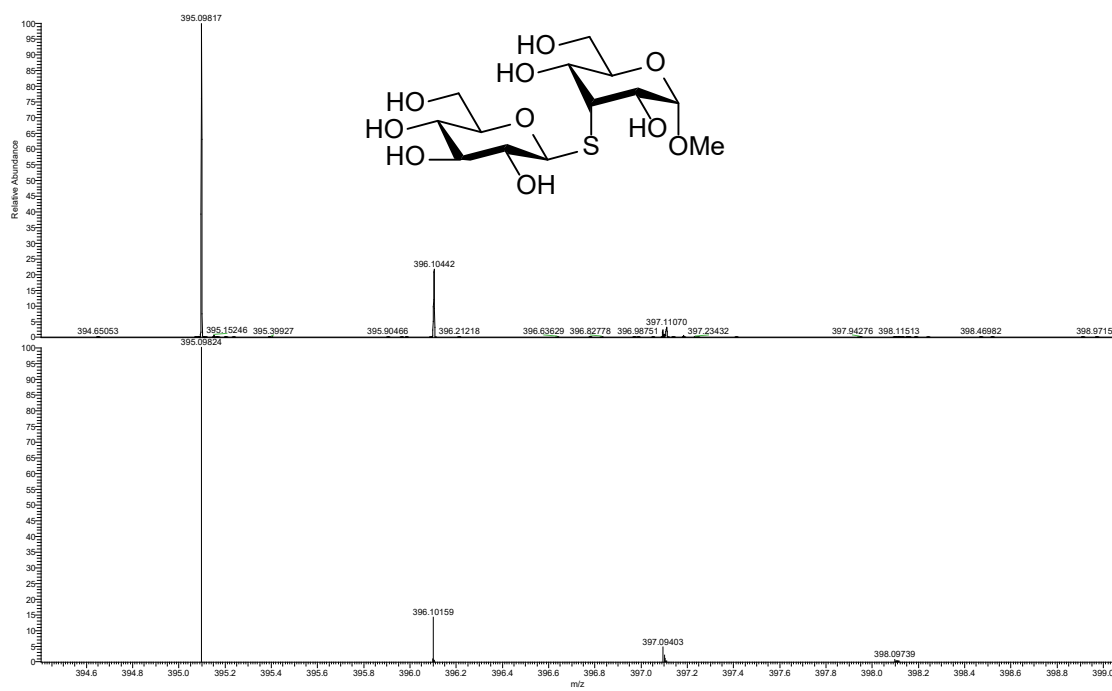

NL:  
 4.58E5  
 NR739A\_2301311026  
 S562-23 RT:  
 0.01-0.60 AV: 22 T:  
 FTMS + p ESI Full ms  
 [50.00-550.00]

NL:  
 8.03E5  
 C<sub>13</sub>H<sub>24</sub>O<sub>10</sub> SNa:  
 C<sub>13</sub>H<sub>24</sub>O<sub>10</sub> S<sub>1</sub> Na<sub>1</sub>  
 p4 Chg 1
